# Supplementary material
Source: publisher figshare collection journal article supplement (https://acs.figshare.com/ndownloader/files/10689205)
Supplement: Supplementary file 1 [file 10689205]

## Sheet: 2_Atom_Fragment_Dictionary
Dictionary for fragments with 2 heavy atoms
Key	Fragment String
frg_1	C3H3-C2
frg_2	O=C2
frg_3	O-C2
frg_4	O-C3H
frg_5	C3H2-C3H
frg_6	C3H2-C2
frg_7	OH-C2
frg_8	C3H2-[N3+]
frg_9	C3H3-[N3+]
frg_10	OH-C3H
frg_11	C3H-C2H
frg_12	C3H-C3H
frg_13	C2H=C2H
frg_14	C2H-C2H
frg_15	C2H=C2
frg_16	C3H-C2
frg_17	C2-C2
frg_18	C3H3-C3H
frg_19	N3H2-C3H2
frg_20	O-C3H2
frg_21	P3-O
frg_22	P3-OH
frg_23	P3=O
frg_24	Cl-c
frg_25	cH:c
frg_26	c:c
frg_27	cH:cH
frg_28	N_Pl3-c
frg_29	O=N_Pl3
frg_30	C3H3-C3H2
frg_31	n-C3H2
frg_32	n:cH
frg_33	n:[c.]
frg_34	c:[c.]
frg_35	[c.]:[c.]
frg_36	N3H2-c
frg_37	n:c
frg_38	C3H2-C3
frg_39	C3H3-C3
frg_40	OH-C3
frg_41	C3H-C3
frg_42	N3H2-C2
frg_43	N3H-C2
frg_44	N2=C2
frg_45	C2=C2
frg_46	N3H-C3H2
frg_47	N3H-C3H
frg_48	N3-C3H2
frg_49	N3-C2H
frg_50	N3-c
frg_51	O=C2H
frg_52	C2-c
frg_53	C3H2-C3H2
frg_54	N2-C2
frg_55	Cl-C3H2
frg_56	OH-c
frg_57	C2H-C2
frg_58	N2-C3H
frg_59	C3H2-C2H
frg_60	OH-C3H2
frg_61	C3H2-c
frg_62	C3-C2
frg_63	N3-C3H
frg_64	OH-N3
frg_65	N3-C3
frg_66	N3-C2
frg_67	N3H2-C3H
frg_68	Cl-C3
frg_69	O-C3
frg_70	C3-C2H
frg_71	S3-C3H3
frg_72	S3-C3H2
frg_73	O-C2H
frg_74	S3-C2
frg_75	n-C3H
frg_76	O-C3H3
frg_77	O-c
frg_78	C3H3-C2H
frg_79	Cl-C2
frg_80	Cl-C3H
frg_81	N1#C1
frg_82	C1-c
frg_83	C2H2=C2
frg_84	P3H-C3H2
frg_85	P3H-OH
frg_86	P3H=O
frg_87	cH:[c.]
frg_88	C3H-c
frg_89	C2H2=C2H
frg_90	S3H-C3H2
frg_91	C2H-c
frg_92	S3-OH
frg_93	S3=O
frg_94	nH:cH
frg_95	nH:c
frg_96	N2-C3H2
frg_97	N2=C2H
frg_98	N3H-C2H
frg_99	C3H-[N_Pl3+]
frg_100	C2H=[N_Pl3+]
frg_101	C2-[N_Pl3+]
frg_102	N3H-c
frg_103	nH:[c.]
frg_104	N3-C3H3
frg_105	N3H-C3H3
frg_106	Se-C2
frg_107	S3H-C2
frg_108	S3-C3
frg_109	S3-[C3^H]
frg_110	[C3^H]-[C3^H]
frg_111	[N3^]-[C3^H]
frg_112	N3H2-[C3^H]
frg_113	[C3^H]-[C2^]
frg_114	O=[C2^]
frg_115	[N3^]-[C2^]
frg_116	C3H-[N3^]
frg_117	C2H-[N1+]
frg_118	N1#[N1+]
frg_119	N2-C2H
frg_120	C3H3-c
frg_121	O-[C3^H]
frg_122	[C3^H2]-[C3^H]
frg_123	[O^]-[C3^H]
frg_124	C3H-[C3^H]
frg_125	S2=P3
frg_126	P3H2-C3H
frg_127	S3-O
frg_128	OH-As
frg_129	O=As
frg_130	S3-C3H
frg_131	c-c
frg_132	N2H=C2
frg_133	O-N2
frg_134	O=C1
frg_135	[O+]#[C1-]
frg_136	OH-C2H
frg_137	O-N3H2
frg_138	C3-[C3^]
frg_139	Cl-[C3^]
frg_140	[C3^]-[C3^]
frg_141	C2-[C3^]
frg_142	N2-C3
frg_143	C3-C3
frg_144	P3-C3H2
frg_145	S3-S3
frg_146	O-[P3+]
frg_147	OH-[P3+]
frg_148	C2-C1
frg_149	C1#C1
frg_150	N_Pl3-C3H
frg_151	O-N3H
frg_152	OH-N3H
frg_153	O=N3
frg_154	cH:[n+]
frg_155	C3H-[n+]
frg_156	C3-c
frg_157	S3H-C3H
frg_158	C3H3-[n+]
frg_159	C3H3-[N_Pl3+]
frg_160	N3H-C3
frg_161	C3H3-[S3+]
frg_162	C3H2-[S3+]
frg_163	C2H-[C3^H]
frg_164	[C3^H]-[C3^]
frg_165	C3H2-[C3^H]
frg_166	C3H3-[C3^]
frg_167	C3H2-[C3^]
frg_168	O-N3
frg_169	S3-C2H
frg_170	S3-N3H
frg_171	N2-c
frg_172	C3H2-[n+]
frg_173	c:[n+]
frg_174	s:cH
frg_175	s:c
frg_176	N2H=C2H
frg_177	N3H2-[C3^]
frg_178	[C3^H2]-[C3^]
frg_179	[C3^H2]-[C3^H2]
frg_180	OH-C1
frg_181	C3H-[N3+]
frg_182	Hg-c
frg_183	o:[c.]
frg_184	P3-N2
frg_185	[O^]-[C3^]
frg_186	OH-N2
frg_187	O=C2H2
frg_188	N3H2-C2H
frg_189	o:cH
frg_190	o:c
frg_191	S3H-S3
frg_192	N1#C1H
frg_193	S3H-C1
frg_194	OH-OH
frg_195	OH-N3H2
frg_196	S3H=O
frg_197	I-I
frg_198	Se-C3H2
frg_199	I-c
frg_200	S3H-C3H3
frg_201	OH-C3H3
frg_202	OH-N_Pl3
frg_203	O=N2H
frg_204	O=N2
frg_205	N1#N1
frg_206	O=N1
frg_207	O=O
frg_208	O-O
frg_209	nH:n
frg_210	S3-c
frg_211	c-[N_Pl3+]
frg_212	OH-[N_Pl3+]
frg_213	O=[N_Pl3+]
frg_214	S3=S2
frg_215	Se-OH
frg_216	Se=O
frg_217	Se=P3
frg_218	OH-[S3^+]
frg_219	O=[S3^+]
frg_220	[S3^+]-[C3^H2]
frg_221	S2=O
frg_222	W-OH
frg_223	W=O
frg_224	P3H-O
frg_225	S3-N3
frg_226	n:n
frg_227	N3H2-C3
frg_228	C2-[C3^H]
frg_229	OH-[C3^]
frg_230	[O^]-[C3^H2]
frg_231	C3-C1
frg_232	C3H2-Br
frg_233	c-Br
frg_234	OH-B
frg_235	C3H-B
frg_236	S3-[N3^]
frg_237	P3-C3H
frg_238	S3-N3H2
frg_239	I-C3H
frg_240	C2-[N3^]
frg_241	P3-C3H3
frg_242	P3-Cl
frg_243	F-C2
frg_244	I-C2
frg_245	n-C2H
frg_246	F-C3
frg_247	P3-C3
frg_248	N3H-N3H
frg_249	n-C3H3
frg_250	C3H-[C2+]
frg_251	[O+]-[C2+]
frg_252	C2=[OH+]
frg_253	c-[N3+]
frg_254	S3H-c
frg_255	F-c
frg_256	c-[C3^H]
frg_257	N3H-[C3^H]
frg_258	n-c
frg_259	N3H2-n
frg_260	N3-N3
frg_261	N3-N2
frg_262	C2=[c.]
frg_263	N2=[c.]
frg_264	n-C3
frg_265	C3H2-C1
frg_266	C1H#C1
frg_267	OH-O
frg_268	N2=N1
frg_269	C3H-C1
frg_270	C1-C1
frg_271	F-C3H
frg_272	C3H2-B
frg_273	o:n
frg_274	I-C3H2
frg_275	C3H-Br
frg_276	[O-]-[n+]
frg_277	S2=C2
frg_278	N3H-N3
frg_279	O-B
frg_280	c-B
frg_281	s:[c.]
frg_282	N_Pl3-C2
frg_283	C3H3-[C3^H]
frg_284	[N3^]-[C3^H2]
frg_285	S3H-C2H
frg_286	F-C3H2
frg_287	N3H2-N3H
frg_288	N_Pl3-C3H2
frg_289	nH:[n+]
frg_290	S3-F
frg_291	P3-C2H
frg_292	N2=N2
frg_293	Si-C3H3
frg_294	Si-c
frg_295	Hg-Cl
frg_296	S3=N2H
frg_297	o:[n+]
frg_298	C3-[N_Pl3+]
frg_299	[O-]-[N_Pl3+]
frg_300	n:[n+]
frg_301	C2-Br
frg_302	C3-Br
frg_303	N_Pl3-C3
frg_304	P3-N3H
frg_305	C2H-C1
frg_306	N3H-N2
frg_307	C2H-[N_Pl3+]
frg_308	C2=[N_Pl3+]
frg_309	n-C2
frg_310	N3H-[N1+]
frg_311	N3H-Br
frg_312	[C3^H]-[C2^H]
frg_313	[C2^H]=[C2^H]
frg_314	Se-C3H3
frg_315	Te-C3H3
frg_316	Te-C3H2
frg_317	[N3^H]-[C3^H2]
frg_318	[N3^H]-[C3^H]
frg_319	S3-P3
frg_320	c-As
frg_321	[n+]:[c.]
frg_322	S3H-P3
frg_323	F-Al
frg_324	c-[n+]
frg_325	N3H2-N2
frg_326	[C3^H2]-[C2^]
frg_327	S3-n
frg_328	P3-c
frg_329	O-n
frg_330	[c.]=[c.]
frg_331	C3H-[C3^]
frg_332	O-N_Pl3
frg_333	S3-N2
frg_334	S2=C1
frg_335	N2=C1
frg_336	C3H3-C1
frg_337	[O^]-[C2^]
frg_338	N2-C3H3
frg_339	ClH=C2
frg_340	s:n
frg_341	S3H-C3
frg_342	C3H3-As
frg_343	N3H-[C3^]
frg_344	O-[C3^]
frg_345	[C3^]-[C2^]
frg_346	[S3^]-[C3^H]
frg_347	[S3^]-[C2^]
frg_348	C2=[C2^]
frg_349	cH:[n.+]
frg_350	n:[n.+]
frg_351	[n.+]:[c.]
frg_352	C2-[n+]
frg_353	Hg-C3H2
frg_354	c-[C3^]
frg_355	N3H-C1
frg_356	N3-[C3^H]
frg_357	Cl-[Pt[2+]]
frg_358	Pt-Cl
frg_359	C3-[C3^H]
frg_360	P3-N3
frg_361	S3-C1
frg_362	c-[I+]
frg_363	C2H-Br
frg_364	Se-N3
frg_365	Se-c
frg_366	C1-[C3^H]
frg_367	P3-C2
frg_368	N2-N2
frg_369	Cl-C2H
frg_370	P3-[C3^H]
frg_371	N3-Cl
frg_372	I-C1
frg_373	C2H=[c.]
frg_374	Si-OH
frg_375	Si-C3H2
frg_376	Si-C3H
frg_377	C3H2-[N_Pl3+]
frg_378	N3H-N_Pl3
frg_379	C2H2=C1
frg_380	C2H=C1
frg_381	N2=C2H2
frg_382	P3-N3H2
frg_383	P3-F
frg_384	O-[n+]
frg_385	N3-[n+]
frg_386	N2=[N_Pl3+]
frg_387	N3-[N_Pl3+]
frg_388	N3H-n
frg_389	N3H2-[N3+]
frg_390	N3-Br
frg_391	N_Pl3=C2H
frg_392	c-[S3+]
frg_393	OH-[S3+]
frg_394	N_Pl3-C2H
frg_395	N2-[C3^H]
frg_396	N2=N_Pl3
frg_397	N3-N_Pl3
frg_398	N3H2-N3
frg_399	C2H-[C3^]
frg_400	S3=[OH+]
frg_401	Cl-[C3^H]
frg_402	C3H2-[Hg+]
frg_403	P3-[N3^]
frg_404	C3H-[S3+]
frg_405	Se-C1
frg_406	Zn-Cl
frg_407	c-[N3^]
frg_408	P3=N2
frg_409	Si-O
frg_410	Sn-C3H2
frg_411	C3H3-[N3^+]
frg_412	C3H2-[N3^+]
frg_413	[N3^+]-[C3^H2]
frg_414	O-As
frg_415	c-[Hg+]
frg_416	S3=N2
frg_417	N2-N_Pl3
frg_418	C2-[N3+]
frg_419	C3H3-Br
frg_420	C3H3-C3H3
frg_421	C1H#C1H
frg_422	Cl-C3H3
frg_423	I-C3H3
frg_424	N3H2-C3H3
frg_425	F-C2H
frg_426	N2H=C1
frg_427	F-B
frg_428	N_Pl3-C3H3
frg_429	Si-Cl
frg_430	Pb-C3H3
frg_431	Si-C2H
frg_432	Sn-c
frg_433	c-[Sn+]
frg_434	P3-C1
frg_435	Pb-C3H2
frg_436	C3H2-[Sn+]
frg_437	N_Pl3=C2
frg_438	C3H3-[Hg+]
frg_439	O=Bi
frg_440	S3-As
frg_441	S3-Cl
frg_442	C3H2-Al
frg_443	Cl-Al
frg_444	N2H=N2
frg_445	N2-Cl
frg_446	Hg-C3H3
frg_447	F-[C3^]
frg_448	C3H2-[P3+]
frg_449	As=As
frg_450	S3-Bi
frg_451	C2H2=[C2^]
frg_452	cH:[c^]
frg_453	[c^]:[c^]
frg_454	[c^]-[c^]
frg_455	[S3^]-[C3^H2]
frg_456	[Si^]-[Se^]
frg_457	C2H-As
frg_458	N3H2-N3H2
frg_459	Si-F
frg_460	Cl-As
frg_461	N1=C2H2
frg_462	I-C3
frg_463	F-As
frg_464	c-[N1+]
frg_465	F-[P6-]
frg_466	Sn-F
frg_467	[Si+]#[C1-]
frg_468	N3H2-C1
frg_469	N2-C1
frg_470	C2H-[N3+]
frg_471	C3H2-[C2^]
frg_472	[C2^]=[C2^]
frg_473	Cl-C1
frg_474	N3-Hg
frg_475	N3-C1
frg_476	U=O
frg_477	C3H2-[N3^]
frg_478	O-I
frg_479	C3H2-As
frg_480	Sb-c
frg_481	Sb-OH
frg_482	Sb=O
frg_483	N3-[C3^]
frg_484	P3-[N3+]
frg_485	C2-[N1+]
frg_486	[N1+]#[C1-]
frg_487	I-C2H
frg_488	Hg-C1
frg_489	F-C3H3
frg_490	C3H3-[N1+]
frg_491	C3H3-Bi
frg_492	Sb-C3H3
frg_493	Sn-C3H3
frg_494	Sb-Cl
frg_495	C3-[N3+]
frg_496	Ge-C3H2
frg_497	C2=C1
frg_498	c-Bi
frg_499	C3H2-[N1+]
frg_500	P3H2-c
frg_501	Sn-Cl
frg_502	Br-As
frg_503	C1-As
frg_504	P3H-C3
frg_505	C3H-As
frg_506	Hg-C3H
frg_507	F-[C2^]
frg_508	C3-[N3^]
frg_509	[O^]-[c^]
frg_510	[c^]:[c.]
frg_511	[S3^]-[C3^]
frg_512	C3H3-[N3^]
frg_513	P3H-C3H
frg_514	c-[P3+]
frg_515	N3-B
frg_516	Si-N3H
frg_517	P3-n
frg_518	Sn-Br
frg_519	Pb-Cl
frg_520	[C3^H]-[c^]
frg_521	[C3^H2]-[c^]
frg_522	OH-[As+]
frg_523	c-[As+]
frg_524	Pb-c
frg_525	Hg-Br
frg_526	O=Al
frg_527	Si=O
frg_528	O-Al
frg_529	Ga#As
frg_530	Se=As
frg_531	Se-As
frg_532	O=Be
frg_533	O-Bi
frg_534	O=Ca
frg_535	O=Cd
frg_536	S2=Cd
frg_537	Se=Cd
frg_538	O=Co
frg_539	S2=Fe
frg_540	OH-Fe
frg_541	O=Fe
frg_542	O=Mg
frg_543	Pb=O
frg_544	Se=Fe
frg_545	O=Mn
frg_546	O=Mo
frg_547	O=Ni
frg_548	Zn=O
frg_549	Th=O
frg_550	P2=O
frg_551	P2-O
frg_552	Sb-O
frg_553	V=O
frg_554	V-O
frg_555	O=[U[2+]]
frg_556	S3-[P3^]
frg_557	[P3^]-[P3^]
frg_558	S2=Pb
frg_559	Sr=S2
frg_560	Zn=S2
frg_561	S2=Mo
frg_562	O-Mn
frg_563	OH-Mn
frg_564	O=Cu
frg_565	S2=Cu
frg_566	S2=Co
frg_567	P2-C3H
frg_568	O-C1
frg_569	O=Cr
frg_570	OH-[Si^]
frg_571	[Si^]-[O^]
frg_572	S2=Bi
frg_573	S2=[Bi+]
frg_574	S6-C3
frg_575	S6-F
frg_576	P3=C2H
frg_577	Ga-C3H3
frg_578	Se-Se
frg_579	[N3^H]-[C2^]
frg_580	[N3^]-[C3^]
frg_581	S3H-N3H
frg_582	Sn-OH
frg_583	Sn=O
frg_584	N3H-Hg
frg_585	C2H-[N3^]
frg_586	OH-Cl
frg_587	O=Cl
frg_588	S2=As
frg_589	S3-Hg
frg_590	N2-n
frg_591	OH-[C2^]
frg_592	[C2^]-[C2^]
frg_593	Sn-C3H
frg_594	Sb-S3
frg_595	Cl-[C2^]
frg_596	C1-[C3^]
frg_597	[N3^]-[C2^H]
frg_598	C1-[C2^]
frg_599	S3-[P3+]
frg_600	S2=N1
frg_601	C3H-[I+]
frg_602	Ge-Cl
frg_603	N1=C2H
frg_604	C3H3-[C2^]
frg_605	C2-[C2^]
frg_606	C3H3-[Sn+]
frg_607	S2=N2
frg_608	Se-Cl
frg_609	C3H3-[As+]
frg_610	P2-OH
frg_611	Se=C2H2
frg_612	c:[n.+]
frg_613	C3-[N1+]
frg_614	I-As
frg_615	Si-S3
frg_616	Sn-I
frg_617	Sb#Sb
frg_618	Se=S2
frg_619	Cu-Cl
frg_620	Ti-Cl
frg_621	F-Cl
frg_622	S3H-OH
frg_623	O=B
frg_624	V-Cl
frg_625	[N2^]-[C3^H]
frg_626	[N2^]=[N2^]
frg_627	Co-Cl
frg_628	P5-F
frg_629	N3H-Cl
frg_630	OH-I
frg_631	O=I
frg_632	I-Cu
frg_633	Zr=O
frg_634	Zn-Br
frg_635	Fe-Cl
frg_636	Ni-Cl
frg_637	Ta-Cl
frg_638	Br-Br
frg_639	Br-Al
frg_640	C3H3-[Se+]
frg_641	C3H2-[Se+]
frg_642	OH-Cr
frg_643	OH-Br
frg_644	O=Br
frg_645	Mn-Cl
frg_646	I-Hg
frg_647	O-Cr
frg_648	F-F
frg_649	Cl-Cl
frg_650	Mn-F
frg_651	N2H=N1
frg_652	N3H2-N_Pl3
frg_653	P3-P3
frg_654	O-F
frg_655	Pb-F
frg_656	Zn-F
frg_657	Fe-F
frg_658	N3-F
frg_659	Sb-F
frg_660	S7-F
frg_661	Se-F
frg_662	Te-F
frg_663	U-F
frg_664	Cl-Ag
frg_665	I-Ag
frg_666	Cl-Bi
frg_667	Cu-Br
frg_668	Cd-Br
frg_669	Co-Br
frg_670	P3-Br
frg_671	Sb-Br
frg_672	OH-Mo
frg_673	F-Cd
frg_674	I-Cl
frg_675	Tl-Cl
frg_676	O-Cl
frg_677	Cr-Cl
frg_678	Eu-Cl
frg_679	In-Cl
frg_680	Ir-Cl
frg_681	Zr-Cl
frg_682	P5-Cl
frg_683	F-Co
frg_684	Ni-F
frg_685	Pb-Br
frg_686	Rh-Cl
frg_687	Lu-Cl
frg_688	Pb-I
frg_689	Te-OH
frg_690	Te=O
frg_691	Cl-Cd
frg_692	Ho-Cl
frg_693	Cl-[N3^]
frg_694	Br-B
frg_695	Cl-B
frg_696	N3H-F
frg_697	Si-N2
frg_698	N_Pl3-N_Pl3
frg_699	N3H2-Cl
frg_700	B-B
frg_701	W#C1H
frg_702	C3H3-Al
frg_703	Fe-Br
frg_704	O=[S3^]
frg_705	N3H-[N_Pl3+]
frg_706	Ga-Cl
frg_707	Ge-Br
frg_708	Cl-Au
frg_709	Ni-I
frg_710	Ti=O
frg_711	In-Br
frg_712	OH-[C3^H]
frg_713	V-OH
frg_714	N2-Br
frg_715	Si-N3
frg_716	P3H-F
frg_717	N2-[N3^]
frg_718	Ge-C3H3
frg_719	S2=Ge
frg_720	P3H-C3H3
frg_721	C3H3-[Sn[3+]]
frg_722	S2=Ni
frg_723	Ta-F
frg_724	Se-N2
frg_725	S2=N_Pl3
frg_726	Si-n
frg_727	Si-C3
frg_728	[O+]=[c.]
frg_729	C2-[O+]
frg_730	OH-[N3+]
frg_731	S2=Ca
frg_732	Os=O
frg_733	N2=[C2^]
frg_734	n-[n+]
frg_735	O=Hg
frg_736	[N2^]-[C3^]
frg_737	Te-c
frg_738	Hg-C2
frg_739	OH-Al
frg_740	C3H2-[Pb[2+]]
frg_741	F-C1
frg_742	Sn-S3
frg_743	Si-C1
frg_744	Br-Au
frg_745	O=[V[2+]]
frg_746	N3H-B
frg_747	s:[n+]
frg_748	S3H-[C3^]
frg_749	C1=C1
frg_750	C1-B
frg_751	Ge-F
frg_752	N3H-[n+]
frg_753	[N2^]=[C2^]
frg_754	N2-[N3+]
frg_755	Br-[C3^H]
frg_756	Hf-Cl
frg_757	S3H-[C3^H]
frg_758	N3H-[N3+]
frg_759	N3H-[P3+]
frg_760	N3-[P3+]
frg_761	O-[N_Pl3+]
frg_762	C2H=[O+]
frg_763	C3H3-[O+]
frg_764	Se-P3
frg_765	[C2^H]=[C2^]
frg_766	[C2^H]-[C2^]
frg_767	C2H=[N1+]
frg_768	N2H=[N1+]
frg_769	S3H=C2H2
frg_770	S7-C3H3
frg_771	S7-OH
frg_772	N3-n
frg_773	C2-B
frg_774	P5-O
frg_775	P5-c
frg_776	N3H2-[n+]
frg_777	OH-F
frg_778	[N3+]-[C3^H]
frg_779	C3H2-[As+]
frg_780	Si#Fe
frg_781	C3-[P3+]
frg_782	N3-[N3+]
frg_783	P3=C2
frg_784	Nb-Cl
frg_785	C3H-[C2^]
frg_786	c-[C2^]
frg_787	Cl-[Hg+]
frg_788	C3H2-[Sn[3+]]
frg_789	OH-[n+]
frg_790	[O^]-[O^]
frg_791	S3-[C3^]
frg_792	N3H-[N3^]
frg_793	[N3^H]-[C3^]
frg_794	[N3^H]-[N3^]
frg_795	S3-P3H
frg_796	O-[N3^]
frg_797	O-[N3+]
frg_798	C1-Br
frg_799	S3H-N3
frg_800	IH-Cl
frg_801	n-[C3^H]
frg_802	Pb-C1
frg_803	N1=C2
frg_804	N2-[N1+]
frg_805	Sn=S2
frg_806	Pd-Cl
frg_807	Te-Cl
frg_808	Tb-Cl
frg_809	Gd-Cl
frg_810	Mo-Cl
frg_811	Sm-Cl
frg_812	Yb-Cl
frg_813	Cl-[Pd+]
frg_814	OH-Co
frg_815	Ti=S2
frg_816	S3H-As
frg_817	Se=Pb
frg_818	Sb#Ni
frg_819	Pb-N2
frg_820	Si-Br
frg_821	Tm-Cl
frg_822	Pd-Br
frg_823	Cl-Br
frg_824	N2-I
frg_825	N2-Hg
frg_826	OH-[N1+]
frg_827	S3=C2H2
frg_828	Ni#As
frg_829	O=Ba
frg_830	Se=Ni
frg_831	Sb=S2
frg_832	S2=Hg
frg_833	S6-S6
frg_834	F-Ag
frg_835	Tl-F
frg_836	Tl-Br
frg_837	P5-Br
frg_838	Tl-I
frg_839	O-[C2^]
frg_840	Te=Ni
frg_841	IH=I
frg_842	O-[P5^]
frg_843	[P5^]-[O^]
frg_844	Ge-C3H
frg_845	Ge-C3
frg_846	Te=Mo
frg_847	La-Cl
frg_848	C2=[O+]
frg_849	Hg-C3
frg_850	Ge-c
frg_851	C3H3-[P3+]
frg_852	Cl-[P3+]
frg_853	Sn-C2H
frg_854	Ga-C3H2
frg_855	Br-Ag
frg_856	N_Pl3-F
frg_857	Nd-Cl
frg_858	Dy-Cl
frg_859	Th-Cl
frg_860	U-Cl
frg_861	Te=Te
frg_862	N1#B
frg_863	F-Cr
frg_864	V-F
frg_865	Re-F
frg_866	[Si-]#[O+]
frg_867	Er-Cl
frg_868	Zn-I
frg_869	Pr-Cl
frg_870	Y-Cl
frg_871	C2-As
frg_872	[Si^]-[C3^H2]
frg_873	[O^]-[N3^]
frg_874	C1=Be
frg_875	Se=C1
frg_876	S3-Br
frg_877	P3H-c
frg_878	P3H2-C3H3
frg_879	C3H3-B
frg_880	C3H2-Bi
frg_881	[S3^]-[O^]
frg_882	S2=C2H
frg_883	S6-C3H2
frg_884	[C3^H2]-[C2^H]
frg_885	N2-[P3+]
frg_886	Sn-N3
frg_887	S2=P3H
frg_888	OH-n
frg_889	c-[Si^]
frg_890	[Si^]-[Si^]
frg_891	I-Ge
frg_892	Si-Si
frg_893	Sb-C3H2
frg_894	C3-[S3+]
frg_895	N2-[n+]
frg_896	N2H=N_Pl3
frg_897	C3H-[N1+]
frg_898	n-C1
frg_899	F-[C3^H]
frg_900	C2H=[C2^]
frg_901	O=Ce
frg_902	n-n
frg_903	O=[S3+]
frg_904	I-Al
frg_905	Sn-C1
frg_906	C3H3-[Sb+]
frg_907	P3=N2H
frg_908	C3H3-[Si^]
frg_909	Si-N3H2
frg_910	Cl-[Si^]
frg_911	Si-C2
frg_912	Se=C2
frg_913	C1=[N1+]
frg_914	O=[N1+]
frg_915	[Si^]-[N3^]
frg_916	C3-As
frg_917	[C2^H]-[c^]
frg_918	[N3^H]-[N3^H]
frg_919	[N2^]-[C3^H2]
frg_920	As-As
frg_921	S2=C2H2
frg_922	Cl-[Ti+]
frg_923	Cl-[Al+]
frg_924	[N3^]-[N3^]
frg_925	N_Pl3=[c.]
frg_926	Hg-F
frg_927	Ga-F
frg_928	In-F
frg_929	Zr-F
frg_930	Nb-F
frg_931	Mo-F
frg_932	Br-Bi
frg_933	F-Bi
frg_934	I-Br
frg_935	Se-Br
frg_936	Te-I
frg_937	Te-Br
frg_938	Ir-Br
frg_939	F-Ce
frg_940	I-Au
frg_941	Sc-Cl
frg_942	Dy#As
frg_943	Gd#As
frg_944	Ho#As
frg_945	Lu#As
frg_946	Mn#As
frg_947	Tb#As
frg_948	Tl#As
frg_949	Tm#As
frg_950	Yb#As
frg_951	Cr#B
frg_952	Fe#B
frg_953	Mo#B
frg_954	Ni#B
frg_955	Ta#B
frg_956	W#B
frg_957	U#B
frg_958	Te=Ba
frg_959	Te=Ca
frg_960	Te=Co
frg_961	Te=Cu
frg_962	N1#Dy
frg_963	N1#Er
frg_964	N1#Eu
frg_965	S2=Eu
frg_966	Se=Eu
frg_967	Te=Eu
frg_968	Te=Fe
frg_969	N1#Ho
frg_970	O=Ir
frg_971	S2=Mg
frg_972	Te=Mg
frg_973	Te=Mn
frg_974	N1#Mo
frg_975	Ta#N1
frg_976	Tb#N1
frg_977	Tm#N1
frg_978	Te-Na
frg_979	O=Nb
frg_980	Se=Nb
frg_981	Te=Nb
frg_982	Pt=O
frg_983	Pd=O
frg_984	Pr=O
frg_985	Re=O
frg_986	Ru=O
frg_987	Zr-OH
frg_988	S2=Pt
frg_989	S2=Re
frg_990	Se=Re
frg_991	U=S2
frg_992	Zr=S2
frg_993	Tm=Se
frg_994	Yb=Se
frg_995	Ta=Se
frg_996	Te=Sr
frg_997	Fe#As
frg_998	K-As
frg_999	Li-As
frg_1000	Na-As
frg_1001	Pr#As
frg_1002	Mn#B
frg_1003	Nb#B
frg_1004	V#B
frg_1005	Se=Cr
frg_1006	Se=Mo
frg_1007	W#N1
frg_1008	Ti-OH
frg_1009	Se=Ge
frg_1010	Te=Re
frg_1011	Ti=Se
frg_1012	W=Se
frg_1013	Te=Ta
frg_1014	Ti=Te
frg_1015	W=Te
frg_1016	Te=Hg
frg_1017	S2=Pd
frg_1018	N1#Lu
frg_1019	Yb=Te
frg_1020	Te-Li
frg_1021	Se-Li
frg_1022	Rh=O
frg_1023	Th=S2
frg_1024	W=S2
frg_1025	U=Se
frg_1026	U=Te
frg_1027	Te-K
frg_1028	Ta=S2
frg_1029	In-C3H3
frg_1030	Se=Hf
frg_1031	S2=Nb
frg_1032	S2=Ru
frg_1033	V=S2
frg_1034	Zr=Se
frg_1035	Te-Cs
frg_1036	Te-Rb
frg_1037	Se=Be
frg_1038	Te=Be
frg_1039	OH-Bi
frg_1040	Er#As
frg_1041	La#As
frg_1042	Nb#As
frg_1043	Nd#As
frg_1044	Sm#As
frg_1045	Y#As
frg_1046	Te=Ge
frg_1047	V=Se
frg_1048	Se=Mn
frg_1049	Ta-OH
frg_1050	Ta=O
frg_1051	O=Ge
frg_1052	O-Ge
frg_1053	W-Cl
frg_1054	O=[P3^]
frg_1055	[P3^]-[O^]
frg_1056	[O^]-[B^]
frg_1057	Os-Cl
frg_1058	Pd-F
frg_1059	Mn-Br
frg_1060	Mo-Br
frg_1061	Ga-Br
frg_1062	I-Ga
frg_1063	Ta-Br
frg_1064	Th-Br
frg_1065	P3-I
frg_1066	Pt-Br
frg_1067	Sc-Br
frg_1068	Si-I
frg_1069	Y-Br
frg_1070	Ti-F
frg_1071	U-Br
frg_1072	U-I
frg_1073	V-Br
frg_1074	Y-I
frg_1075	Nb-Br
frg_1076	In-I
frg_1077	I-B
frg_1078	Pr-Br
frg_1079	Er-Br
frg_1080	La-Br
frg_1081	Nd-Br
frg_1082	Re-Br
frg_1083	Re-Cl
frg_1084	I-Cr
frg_1085	F-Dy
frg_1086	I-Gd
frg_1087	IH-Br
frg_1088	S2=Be
frg_1089	Tb-F
frg_1090	Xe-F
frg_1091	La-F
frg_1092	Pr-F
frg_1093	Sc-F
frg_1094	Y-F
frg_1095	Th-F
frg_1096	Si=S2
frg_1097	Sm-Br
frg_1098	Eu-Br
frg_1099	Yb-Br
frg_1100	Ho-F
frg_1101	Tm-F
frg_1102	Yb-F
frg_1103	Lu-F
frg_1104	F-Er
frg_1105	Sm-F
frg_1106	F-Eu
frg_1107	Gd-F
frg_1108	Re-OH
frg_1109	Kr-F
frg_1110	Hf-Br
frg_1111	I-Hf
frg_1112	Zr-Br
frg_1113	Nb-I
frg_1114	La-I
frg_1115	Pr-I
frg_1116	Nd-I
frg_1117	Sm-I
frg_1118	Tb-I
frg_1119	I-Ho
frg_1120	I-Er
frg_1121	Tm-I
frg_1122	Yb-I
frg_1123	Lu-I
frg_1124	Sb-I
frg_1125	Gd-Br
frg_1126	N3H-[P3^]
frg_1127	[P3^]-[N3^]
frg_1128	Ho-Br
frg_1129	O-[P3^]
frg_1130	Cl-[Pt+]
frg_1131	O=[Ti[2+]]
frg_1132	N2-[O+]
frg_1133	O=[Zr[2+]]
frg_1134	N1#[O+]
frg_1135	c-[C2+]
frg_1136	U-OH
frg_1137	U-O
frg_1138	C3H3-[Pb[2+]]
frg_1139	O=[Mo[2+]]
frg_1140	Se-O
frg_1141	Si-P3
frg_1142	C3H-[P3+]
frg_1143	S2=Mn
frg_1144	S2=Hf
frg_1145	Sn-C3
frg_1146	O=[Mo[4+]]
frg_1147	Os-OH
frg_1148	Te-Te
frg_1149	Se=Hg
frg_1150	OH-Ga
frg_1151	O=Ga
frg_1152	P5-C3H3
frg_1153	P5-I
frg_1154	n-Cl
frg_1155	S2=Ba
frg_1156	Te-O
frg_1157	Si=Mg
frg_1158	As#Al
frg_1159	S3H-S3H
frg_1160	N1#Cr
frg_1161	Br-[C3^]
frg_1162	N1#Al
frg_1163	Yb#N1
frg_1164	Nb#N1
frg_1165	V#N1
frg_1166	Sb#Al
frg_1167	In#As
frg_1168	Te=Cd
frg_1169	Sn-n
frg_1170	O=Ag
frg_1171	Pb=Pb
frg_1172	Ti#N1
frg_1173	Cl-[Sn+]
frg_1174	C2=[N1+]
frg_1175	N2=[N1+]
frg_1176	n-B
frg_1177	P5-C3H2
frg_1178	Zr#N1
frg_1179	Tl-C3H
frg_1180	[C3^H2]-[B^]
frg_1181	[N3^H]-[B^]
frg_1182	N_Pl3-n
frg_1183	Se-C2H
frg_1184	[N_Pl3+]=[c.]
frg_1185	N2-[N_Pl3+]
frg_1186	Ru-Cl
frg_1187	Si-[C3^H]
frg_1188	In-C3H2
frg_1189	Se=Ba
frg_1190	Se=Ca
frg_1191	Se=Co
frg_1192	N3H2-[N_Pl3+]
frg_1193	N2H=[N_Pl3+]
frg_1194	IH-I
frg_1195	C3H2-[O+]
frg_1196	C2H-B
frg_1197	Se-S3
frg_1198	Th=Se
frg_1199	Zr#As
frg_1200	c-[O+]
frg_1201	N3-[C2^]
frg_1202	C2H2=[N_Pl3+]
frg_1203	I-Bi
frg_1204	Ti-I
frg_1205	[P3^]-[C3^H2]
frg_1206	[P3^]-[C3^H]
frg_1207	c-[P3^]
frg_1208	C3H3-[S2+]
frg_1209	C2=[S2+]
frg_1210	N_Pl3-[C3^]
frg_1211	Sb#Eu
frg_1212	Zr#Sb
frg_1213	Th=Te
frg_1214	[N_Pl3+]=[C2^]
frg_1215	C3-[n+]
frg_1216	Se-C3H
frg_1217	S3-[N3+]
frg_1218	S7-C3H2
frg_1219	C3-Al
frg_1220	c:[c^]
frg_1221	S3H-[C2^]
frg_1222	[N2^]-[C2^]
frg_1223	S2=[C2^]
frg_1224	N1#Ga
frg_1225	N1#In
frg_1226	U#N1
frg_1227	N1#Ce
frg_1228	Pr#N1
frg_1229	N1#La
frg_1230	Nd#N1
frg_1231	Sc#N1
frg_1232	Y#N1
frg_1233	Sm#N1
frg_1234	N1#Gd
frg_1235	Co#As
frg_1236	N3H-I
frg_1237	N3-[N3^]
frg_1238	O-[Si^]
frg_1239	P3H2-C3H2
frg_1240	V=Te
frg_1241	Sn=C2H
frg_1242	N3H2-[C2^]
frg_1243	N3H-[C2^]
frg_1244	Sn-O
frg_1245	S7-Br
frg_1246	Tl#Sb
frg_1247	P2=N2
frg_1248	P2-N2
frg_1249	N3-I
frg_1250	Sn-N2
frg_1251	P3H-C2
frg_1252	I-[C3^H]
frg_1253	N3H-[S3+]
frg_1254	C2-[S3+]
frg_1255	Sm#Sb
frg_1256	Zr=Te
frg_1257	Eu#As
frg_1258	[n+]-[B-]
frg_1259	P2=C2H
frg_1260	P2-C2H
frg_1261	Ti-Br
frg_1262	O-Nb
frg_1263	Re-O
frg_1264	Sn=Se
frg_1265	Ti-O
frg_1266	N2H=C2H2
frg_1267	P3H2-C3
frg_1268	N2H=N2H
frg_1269	S7-N3
frg_1270	N2-F
frg_1271	I-Ce
frg_1272	S2=B
frg_1273	S3-B
frg_1274	Te=Sn
frg_1275	[B^]-[B^]
frg_1276	[C3^]-[B^]
frg_1277	N_Pl3-Cl
frg_1278	Os-F
frg_1279	S6-Cl
frg_1280	N3H2-Br
frg_1281	O-Br
frg_1282	Te-C3H
frg_1283	c-[N3^+]
frg_1284	[N3^+]-[C3^H]
frg_1285	C1-[n+]
frg_1286	C2H-[O+]
frg_1287	C2-At
frg_1288	Si=Si
frg_1289	Se-C3
frg_1290	P5-OH
frg_1291	Sn-[N3^]
frg_1292	C2-[P3+]
frg_1293	S7-c
frg_1294	S3-[S3+]
frg_1295	c:[c^.]
frg_1296	cH:[c^.]
frg_1297	[c^.]=[c^.]
frg_1298	[c^.]:[c^.]
frg_1299	[N1+]-[C3^]
frg_1300	[N3^]-[N2^]
frg_1301	C3-[C2^]
frg_1302	Se-N3H
frg_1303	C3H2-[S3^+]
frg_1304	Sn-C2
frg_1305	[C3^]-[C2^H]
frg_1306	C3H3-[C2+]
frg_1307	C3H2-[C2+]
frg_1308	c-[Se+]
frg_1309	n-[N_Pl3+]
frg_1310	Se=C2H
frg_1311	n-Br
frg_1312	O-[S3+]
frg_1313	P3H-N3H
frg_1314	P3H-[N3^]
frg_1315	[N2^]=[C2^H]
frg_1316	c:[n.]
frg_1317	[n.]:[c.]
frg_1318	S3=C2
frg_1319	n:[c^]
frg_1320	Te-C2H
frg_1321	C2H=As
frg_1322	C2H=Bi
frg_1323	C2H-Bi
frg_1324	Sb=C2H
frg_1325	Sb-C2H
frg_1326	Si=C2H
frg_1327	C3-[c^]
frg_1328	[s^]:[c^]
frg_1329	[s^]:[s^]
frg_1330	C3-[P3^]
frg_1331	P2-c
frg_1332	P2=[c.]
frg_1333	Sb-C3
frg_1334	S3-Pb
frg_1335	Ga-c
frg_1336	[C2^H]-[C2^H]
frg_1337	Ga-C2H
frg_1338	Zr-I
frg_1339	Se-[P3^]
frg_1340	Ge-C1
frg_1341	P5-N3
frg_1342	P3=B
frg_1343	P3H2-C2
frg_1344	[P3^]-[C2^]
frg_1345	Tl-C3H3
frg_1346	C3H-[P3^]
frg_1347	[C2^]-[c^]
frg_1348	P3=C2H2
frg_1349	[P5^]-[N3^]
frg_1350	Cl-[P5^]
frg_1351	F-[P5^]
frg_1352	Si=C2H2
frg_1353	P3H=B
frg_1354	C1=[C2^]
frg_1355	P2-C3H3
frg_1356	P2=C2H2
frg_1357	[c^H]:[c^H]
frg_1358	[s^]:[c^H]
frg_1359	[S3^]-[C2^H]
frg_1360	C3-[As^]
frg_1361	[As^]-[As^]
frg_1362	[Si^]-[N3^H]
frg_1363	Te=Se
frg_1364	Te-Si
frg_1365	Si=C1
frg_1366	[Si^]-[C1^]
frg_1367	[C1^]#[C1^]
frg_1368	S2=Ce
frg_1369	[Si^]=[C1^]
frg_1370	O-Mo
frg_1371	Tm=O
frg_1372	Ge=Ge
frg_1373	O=[Mo^]
frg_1374	[O^]-[Mo^]
frg_1375	[P3^]-[As^]
frg_1376	S3-[As^]
frg_1377	Si-B
frg_1378	Ce#Ce
frg_1379	S2=S2
frg_1380	s:s
frg_1381	[Te^]-[Te^]
frg_1382	P3H2-C1
frg_1383	C1=B
frg_1384	Pt-F
frg_1385	W-Br
frg_1386	P2-C2
frg_1387	P2=C2
frg_1388	P3H2-P3H
frg_1389	S6-N3
frg_1390	S3H-B
frg_1391	S5-F
frg_1392	S5=O
frg_1393	Pu-F
frg_1394	W-F
frg_1395	S2=N2H
frg_1396	B-[O+]
frg_1397	F-Br
frg_1398	I-F
frg_1399	O=ClH
frg_1400	Si-S3H
frg_1401	P3-[S2-]
frg_1402	S3H-[P3+]
frg_1403	P3=Co
frg_1404	I-Co
frg_1405	Li-Li
frg_1406	Si-P3H2
frg_1407	F-[P3+]
frg_1408	N3H2-B
frg_1409	Si-Se
frg_1410	P2=B
frg_1411	Si-As
frg_1412	N_Pl3-I
frg_1413	Pt-I
frg_1414	N3H2-F
frg_1415	S3#N1
frg_1416	Hg-C2H
frg_1417	[C3^]-[c^]
frg_1418	[S3^]-[S3^]
frg_1419	C1-Al
frg_1420	C2H2=As
frg_1421	C2H-[C2^]
frg_1422	[S3^]-[c^]
frg_1423	P2-Cl
frg_1424	P3=Fe
frg_1425	Fe=C1
frg_1426	N_Pl3-[C3^H]
frg_1427	Br-[Pt+]
frg_1428	I-[Pt+]
frg_1429	Yb=O
frg_1430	Na-Na
frg_1431	S7-S3
frg_1432	S2=P2
frg_1433	C2=As
frg_1434	[Si^]-[C3^H]
frg_1435	F-[S3+]
frg_1436	C3H3-[P5^]
frg_1437	C3H2-[P5^]
frg_1438	c-[P5^]
frg_1439	N3-[P5^]
frg_1440	Pb-C3
frg_1441	OH-[N3^]
frg_1442	[N3^]-[N_Pl3^+]
frg_1443	O=[N_Pl3^+]
frg_1444	[N_Pl3^+]-[C3^]
frg_1445	Te-C2
frg_1446	[c^.]:[c.]
frg_1447	[c^]:[c^.]
frg_1448	Sb=Sb
frg_1449	nH:nH
frg_1450	N_Pl3=C2H2
frg_1451	Pb-C3H
frg_1452	N1#Ge
frg_1453	C3-[Hg+]
frg_1454	Ga-C1
frg_1455	Mo#Mo
frg_1456	Mo=Mo
frg_1457	C3-B
frg_1458	Ge-C2
frg_1459	N3H2-[N3^]
frg_1460	S3-[C2^]
frg_1461	C3-[Si^]
frg_1462	N2H=[C2^]
frg_1463	[Se^]-[C3^]
frg_1464	[P3^H]-[P2^]
frg_1465	[P2^]=[P2^]
frg_1466	Pb-N3
frg_1467	P2-F
frg_1468	P3H2-OH
frg_1469	Si-[C3^]
frg_1470	N3-As
frg_1471	I-[C3^]
frg_1472	P3H2-C2H
frg_1473	Mn-I
frg_1474	IH-F
frg_1475	N3H2-[P3+]
frg_1476	Se-[C2^]
frg_1477	Mo-I
frg_1478	Te-S3
frg_1479	Te-Se
frg_1480	C3H2-[Si^]
frg_1481	S5=C2H2
frg_1482	N3-[B^]
frg_1483	[P3^]-[B^]
frg_1484	Si-[P3^]
frg_1485	N2-B
frg_1486	[P3^]-[C3^]
frg_1487	Cu=ClH
frg_1488	ClH=Ag
frg_1489	P5-N3H
frg_1490	Si=C2
frg_1491	P2-C3
frg_1492	P3-[P3^]
frg_1493	Te=C2
frg_1494	C3H3-[c^]
frg_1495	[Si^]-[P3^]
frg_1496	N2-[C3^]
frg_1497	[N1+]-[N1+]
frg_1498	P2=P2
frg_1499	N2=[P3^]
frg_1500	[s^]:[c^.]
frg_1501	S3H-N2
frg_1502	Ge-C2H
frg_1503	Cl-[S3+]
frg_1504	Br-[S3+]
frg_1505	O-[As^]
frg_1506	[O^]-[As^]
frg_1507	[Pb^]-[N3^]
frg_1508	S3-I
frg_1509	S5=C2H
frg_1510	P3H-P3
frg_1511	F-[B^]
frg_1512	[S3^]-[B^]
frg_1513	I-Fe
frg_1514	Fe=C2H2
frg_1515	C3-[n^]
frg_1516	[n^]:[n^]
frg_1517	O=[Ti^]
frg_1518	[Ti^]-[O^]
frg_1519	N3-[P3^]
frg_1520	[P3^]=[C2^H]
frg_1521	[P3^]-[C2^H]
frg_1522	[P3^H]-[C3^H]
frg_1523	OH-Nb
frg_1524	Se-I
frg_1525	[P3^]=[C2^]
frg_1526	n:[s+]
frg_1527	Rh-Br
frg_1528	Cl-[Rh+]
frg_1529	[C2^]=[c.]
frg_1530	O=[Os[2+]]
frg_1531	[N3^H]-[c^]
frg_1532	S3=C2H
frg_1533	S3H-[N3+]
frg_1534	P3H-Cl
frg_1535	Cl-[C2+]
frg_1536	S3-[N_Pl3+]
frg_1537	B-[B^]
frg_1538	S7-[C3^H]
frg_1539	S7-C3
frg_1540	C2H-[S3+]
frg_1541	[O^]-[C2^H]
frg_1542	S7-O
frg_1543	Si#N1
frg_1544	Cl-Ce
frg_1545	P3H2-Cl
frg_1546	C2-[Te+]
frg_1547	C2=[Te+]
frg_1548	P3H-C2H
frg_1549	Si=Ca
frg_1550	Si=Ce
frg_1551	Si=Fe
frg_1552	Se=Ga
frg_1553	Si=Mn
frg_1554	Si=N2
frg_1555	Si=Nb
frg_1556	Si=Re
frg_1557	Ta=Si
frg_1558	Ti=Si
frg_1559	U=Si
frg_1560	V=Si
frg_1561	Zr=Si
frg_1562	Si=Pr
frg_1563	S7-C2
frg_1564	Th=Si
frg_1565	C1#[N1+]
frg_1566	Si=Mo
frg_1567	Ge#As
frg_1568	N_Pl3-Br
frg_1569	O=BrH
frg_1570	Ru-OH
frg_1571	N3H2-[S3+]
frg_1572	N3-[S3+]
frg_1573	c-[n^]
frg_1574	[o^]:[n^]
frg_1575	S3H-O
frg_1576	c-[C2H2+]
frg_1577	Ru-I
frg_1578	Ru-Br
frg_1579	S3-N_Pl3
frg_1580	o:o
frg_1581	N3=C2H
frg_1582	S7-C3H
frg_1583	P3-[S3+]
frg_1584	S2=Cl
frg_1585	O=[Tc[3+]]
frg_1586	C2H-[n+]
frg_1587	S2=Ag
frg_1588	C2H-[P3+]
frg_1589	OH-Ge
frg_1590	Bi=As
frg_1591	Si#Mo
frg_1592	P3H-N3
frg_1593	Se-[P3+]
frg_1594	c:[s+]
frg_1595	[s+]:[c.]
frg_1596	S3-P5
frg_1597	P2-N3H
frg_1598	N_Pl3-[S3+]
frg_1599	N2-[C2^]
frg_1600	[N3^]-[c^]
frg_1601	OH-[P3^]
frg_1602	P5-N3H2
frg_1603	Sn=N2
frg_1604	Si-[N3^]
frg_1605	Se=P3H
frg_1606	[S7^]-[C2^]
frg_1607	[S7^]-[N2^]
frg_1608	C3-[S7^]
frg_1609	F-[S7^]
frg_1610	P3H=N2H
frg_1611	Br-[C2^]
frg_1612	Pb-C2
frg_1613	P3-[C2^]
frg_1614	I-[C2^]
frg_1615	P3-[C3^]
frg_1616	I-Cd
frg_1617	C2H-[Si^]
frg_1618	Ni-Br
frg_1619	c-[As^]
frg_1620	P5-C3
frg_1621	P5-[N3^]
frg_1622	Sn-N3H
frg_1623	C3H3-[P3^]
frg_1624	S2=[P3^]
frg_1625	[S3^]-[P3^]
frg_1626	P5-C3H
frg_1627	c-[B^]
frg_1628	P5-[C3^H]
frg_1629	n-[C3^]
frg_1630	Sb#Co
frg_1631	O=Hf
frg_1632	Ce-Br
frg_1633	nH:[n.]
frg_1634	Pb-C2H
frg_1635	[S3^]-[N3^]
frg_1636	[S3^]-[N3^H]
frg_1637	Tl-C3H2
frg_1638	[N_Pl3+]-[N_Pl3+]
frg_1639	C1-[N3^]
frg_1640	[Se^]-[C3^H2]
frg_1641	C2-[As^]
frg_1642	S2=[S3^]
frg_1643	N3H2-[P3^]
frg_1644	n-[P3^]
frg_1645	n:[n.]
frg_1646	Sb-C1
frg_1647	Te-n
frg_1648	Sb-C2
frg_1649	P5-[C3^]
frg_1650	c-[Sb+]
frg_1651	S6-c
frg_1652	S7-Cl
frg_1653	S5-c
frg_1654	S5-O
frg_1655	S5-C3H3
frg_1656	Se-[C3^H]
frg_1657	Se=N2
frg_1658	P5-C2
frg_1659	C3-Bi
frg_1660	Se-N3H2
frg_1661	C2=Au
frg_1662	C3H3-[Bi+]
frg_1663	N3-[Si^]
frg_1664	C2-[P5^]
frg_1665	[S3^]-[P5^]
frg_1666	P2-N3
frg_1667	V=N2
frg_1668	S7-N3H
frg_1669	C3H-[Si^]
frg_1670	N3H2-[P5^]
frg_1671	Se=Mg
frg_1672	[o^]:[n^H]
frg_1673	[n^H]:[c^.]
frg_1674	[o^]:[c^.]
frg_1675	C2=[c^.]
frg_1676	Tl-c
frg_1677	C3H2-[n^]
frg_1678	C3H3-[n^]
frg_1679	cH:[n.]
frg_1680	S3=[c.]
frg_1681	C2H-[B-]
frg_1682	C2H=[B-]
frg_1683	s:[s+]
frg_1684	P3=C1
frg_1685	Se-[N_Pl3+]
frg_1686	Cl-[Ir+]
frg_1687	N3H-[B^]
frg_1688	[N2^]-[B^]
frg_1689	Se-[C3^]
frg_1690	N2-[P5^]
frg_1691	S2=[Mo[2+]]
frg_1692	O=[N3^]
frg_1693	[N3+]-[C2^]
frg_1694	[N_Pl3+]=[B-]
frg_1695	N3-[B-]
frg_1696	C3-[B-]
frg_1697	N2H=[S3+]
frg_1698	I=C2
frg_1699	C2-[I+]
frg_1700	N_Pl3-[N3^]
frg_1701	[N3+]-[C3^]
frg_1702	C1-[P3+]
frg_1703	N2=I
frg_1704	Si-[C2^]
frg_1705	n-[P3+]
frg_1706	[n.+]:[n.]
frg_1707	C2-[n^]
frg_1708	[n^]:[c^]
frg_1709	c-[c^]
frg_1710	[O-]-[N_Pl3^+]
frg_1711	[N2^]=[N_Pl3^+]
frg_1712	[N_Pl3^+]-[C2^]
frg_1713	[N_Pl3^+]-[C3^H]
frg_1714	n-F
frg_1715	[N_Pl3+]-[B^-]
frg_1716	[C2^]-[B^-]
frg_1717	[N_Pl3^+]=[B^-]
frg_1718	C3-[B^-]
frg_1719	[N_Pl3^+]-[B^-]
frg_1720	C3-[N_Pl3^+]
frg_1721	C2=[P3^]
frg_1722	[n^]:[c^.]
frg_1723	S7-C2H
frg_1724	S3#C1H
frg_1725	cH:[s+]
frg_1726	[P3+]-[B-]
frg_1727	IH-c
frg_1728	[C2+]-[B-]
frg_1729	c-[B-]
frg_1730	S5-OH
frg_1731	[N3+]-[B-]
frg_1732	n-Hg
frg_1733	C3H-[N3^+]
frg_1734	Cl-[Co[2+]]
frg_1735	Cl-[Ni[2+]]
frg_1736	Cl-[Cu+]
frg_1737	Cl-[Zn+]
frg_1738	N3H2-[B-]
frg_1739	O-[B-]
frg_1740	[N3^+]-[C3^]
frg_1741	F-[B-]
frg_1742	N3H-[B-]
frg_1743	C1=[Fe+]
frg_1744	C3H-[Hg+]
frg_1745	IH-C2H
frg_1746	[S3^+]-[C3^H]
frg_1747	[S3^+]-[C2^H]
frg_1748	[S3^+]-[C2^]
frg_1749	C3H3-[S3^+]
frg_1750	C3H-[S3^+]
frg_1751	C3H2-[B-]
frg_1752	[O+]-[B-]
frg_1753	C3H-[B-]
frg_1754	IH-IH
frg_1755	[P3+]-[C3^H]
frg_1756	Br-[Ni+]
frg_1757	Cl-[B-]
frg_1758	N3H2-As
frg_1759	P3H-N3H2
frg_1760	P3H=N2
frg_1761	N2-[S3+]
frg_1762	Lr-Cl
frg_1763	Br-[B-]
frg_1764	I-[B-]
frg_1765	Br-[Pt[2+]]
frg_1766	Cl-[Co+]
frg_1767	[n+]-[C3^]
frg_1768	C1-[N3+]
frg_1769	Cl-[Ni+]
frg_1770	I-[Pt[2+]]
frg_1771	IH-C3H
frg_1772	Pd-I
frg_1773	Ga-C3H
frg_1774	C2H-[N3^+]
frg_1775	C2-[N3^+]
frg_1776	I-[Hg+]
frg_1777	S3-[n+]
frg_1778	[P3^+]-[C3^]
frg_1779	C3H3-[P3^+]
frg_1780	c-[P3^+]
frg_1781	S7-N2
frg_1782	Cl-[Ru[2+]]
frg_1783	c-[Te+]
frg_1784	I-[Pd+]
frg_1785	[N_Pl3+]-[B-]
frg_1786	S6-O
frg_1787	As=[c.]
frg_1788	O=[Os^]
frg_1789	[Os^]-[O^]
frg_1790	Sb-C3H
frg_1791	W-O
frg_1792	[S3^+]-[C3^]
frg_1793	S3-[B-]
frg_1794	I-[Ni[2+]]
frg_1795	C2-[B-]
frg_1796	Sn-[C3^H]
frg_1797	[Se^]-[C2^]
frg_1798	[Se^]=[C2^]
frg_1799	[Se^]-[Se^]
frg_1800	C3H-Bi
frg_1801	C3H-[Bi[2+]]
frg_1802	IH-C2
frg_1803	n-[B-]
frg_1804	Pb-N3H
frg_1805	O-[I+]
frg_1806	S3-[O+]
frg_1807	Cl-[O+]
frg_1808	C3H-[O+]
frg_1809	C2-[C2H+]
frg_1810	OH-[C2+]
frg_1811	P2-C3H2
frg_1812	C2-[C2+]
frg_1813	P3-[O+]
frg_1814	[o^]:[o^]
frg_1815	P3-[OH+]
frg_1816	[Hg^]-[C3^H2]
frg_1817	[Hg^]-[C3^H]
frg_1818	[O^+]-[N3^]
frg_1819	[O^+]-[C3^H]
frg_1820	[O^+]-[C3^]
frg_1821	[O^+]-[O^]
frg_1822	C3H-[O^+]
frg_1823	OH-[O+]
frg_1824	O-[O+]
frg_1825	[P3+]-[O+]
frg_1826	C3H2-[S2+]
frg_1827	O=[S2+]
frg_1828	N3-[OH+]
frg_1829	OH-[OH+]
frg_1830	P3-B
frg_1831	S5-N3H2
frg_1832	O=[OH+]
frg_1833	Re=C1
frg_1834	C3H-[OH+]
frg_1835	[O+]-[O+]
frg_1836	C3H2-[O^+]
frg_1837	[O^+]-[O^+]
frg_1838	[P3^]-[O^+]
frg_1839	P3-[O^+]
frg_1840	[O^]-[N3^H]
frg_1841	C3-[O+]
frg_1842	B-[P3+]
frg_1843	c-[S3^+]
frg_1844	C3H3-[As^]
frg_1845	OH-[As^]
frg_1846	[C3^H2]-[As^]
frg_1847	[O^+]-[C3^H2]
frg_1848	O=[P3^H]
frg_1849	[P3^H]-[O^]
frg_1850	[Se^]-[C3^H]
frg_1851	[Se^]-[N3^]
frg_1852	P3H2-O
frg_1853	OH-[P5^]
frg_1854	IH-C3H2
frg_1855	OH-IH
frg_1856	[Si+]-[Si+]
frg_1857	C3H3-[B-]
frg_1858	Cl=[OH+]
frg_1859	[S3+]-[C3^]
frg_1860	[n+]-[C3^H]
frg_1861	n-[N3^]
frg_1862	[C3^H]-[B^]
frg_1863	B-[C3^]
frg_1864	Ru=C2
frg_1865	C3-[Sn+]
frg_1866	C3H3-[C2H2+]
frg_1867	P3=[OH+]
frg_1868	C1H#[N1+]
frg_1869	[Sn-]-[IH+]
frg_1870	c-[Sn-]
frg_1871	Si-[N_Pl3+]
frg_1872	C2=[B-]
frg_1873	[N3+]-[B[2+]]
frg_1874	C1-[B-]
frg_1875	[N3+]-[N3+]
frg_1876	I-[Ru+]
frg_1877	Br-[Co+]
frg_1878	I-[Co+]
frg_1879	I-[Co[2+]]
frg_1880	Br-[Co[2+]]
frg_1881	P3H-Br
frg_1882	P3H2-N3
frg_1883	C2H=[OH+]
frg_1884	C1-[I+]
frg_1885	C2H-[Sb+]
frg_1886	[O+]-[n+]
frg_1887	C2=B
frg_1888	C3-[C2+]
frg_1889	C3H-[B^]
frg_1890	C2-[Hg+]
frg_1891	S7-C1
frg_1892	F-[S5+]
frg_1893	Tb#[O+]
frg_1894	Br-[Rh+]
frg_1895	Mn=C1
frg_1896	O=[W^]
frg_1897	[W^]-[O^]
frg_1898	Sn=Sn
frg_1899	O-Fe
frg_1900	Sr=O
frg_1901	Y=O
frg_1902	Y-O
frg_1903	Ta-O
frg_1904	Re-I
frg_1905	Tm-Br
frg_1906	Lu-Br
frg_1907	Al#[O+]
frg_1908	Pb-n
frg_1909	I-Dy
frg_1910	W=C1
frg_1911	W=P3
frg_1912	Cr=C1
frg_1913	Cr=C2
frg_1914	P3=Mo
frg_1915	I-Eu
frg_1916	Mn=As
frg_1917	Fe=C2
frg_1918	W#W
frg_1919	W=W
frg_1920	F-[S2+]
frg_1921	Co=C1
frg_1922	S6-C2H
frg_1923	[Ge^]=[C1^]
frg_1924	[Ge^]=[Ge^]
frg_1925	Se#C1H
frg_1926	Mo=C2
frg_1927	W=C2
frg_1928	S3=Cr
frg_1929	Cr#Cr
frg_1930	Mo#Cr
frg_1931	Co=C2H2
frg_1932	F-Cu
frg_1933	Ge=C2H2
frg_1934	Sn=C2H2
frg_1935	Pb=C2H2
frg_1936	Ir=C1
frg_1937	Se-B
frg_1938	S6-N3H
frg_1939	Br-[N3^]
frg_1940	W-I
frg_1941	[P3^H]-[P3^H]
frg_1942	N2=Fe
frg_1943	C2H2=[Fe+]
frg_1944	W#C1
frg_1945	F-[N3^]
frg_1946	N3H-[Si^]
frg_1947	S6-N2
frg_1948	Rh-I
frg_1949	C1#[W+]
frg_1950	N3=C2
frg_1951	[N_Pl3+]-[C3^H]
frg_1952	Cr#C1
frg_1953	P3=Cr
frg_1954	Ge-[C3^H]
frg_1955	B-[N3^]
frg_1956	C3-[P5^]
frg_1957	Br-[P5^]
frg_1958	[P5^]-[C3^H2]
frg_1959	[Si^]-[C2^]
frg_1960	Cl-[P3^]
frg_1961	P3H-N2
frg_1962	N3H-[P5^]
frg_1963	S7-I
frg_1964	C3H-[Sn+]
frg_1965	S6-C2
frg_1966	Br-[P3^]
frg_1967	[Si^]-[S3^]
frg_1968	Si-P3H
frg_1969	I-[Bi[2+]]
frg_1970	[n+]:[n+]
frg_1971	P5-N2
frg_1972	C3H3-[Ge^]
frg_1973	[Ge^]-[C3^H2]
frg_1974	C3H2-[Ge^]
frg_1975	N3-[n^]
frg_1976	S6-N3H2
frg_1977	C3H-[n^]
frg_1978	P3-As
frg_1979	P5-C2H
frg_1980	N3-Al
frg_1981	P5-C1
frg_1982	[S7^]-[C3^]
frg_1983	C3H2-[B^]
frg_1984	Pd=P3
frg_1985	[Ge^]-[C3^]
frg_1986	Cl-[Ge^]
frg_1987	[Si^]-[c^]
frg_1988	Te-B
frg_1989	S6-C3H3
frg_1990	N1=[C2^]
frg_1991	Cl-[Rh[2+]]
frg_1992	Sn-[C3^]
frg_1993	P2-[C3^H]
frg_1994	Ni=C2
frg_1995	C3H2-[P3^]
frg_1996	o:[c^]
frg_1997	Tl-C3
frg_1998	Tl-S3
[truncated: 701 more rows]

## Sheet: 3_Atom_Fragments_Dictionary
Dictionary for fragments with 3 heavy atoms
Key	Fragment String
frg_1	O=C2-C3H3
frg_2	O-C2-C3H3
frg_3	C3H-O-C2
frg_4	O=C2-O
frg_5	O-C3H-C3H2
frg_6	C3H-C3H2-[N3+]
frg_7	C3H-C3H2-C2
frg_8	OH-C2-C3H2
frg_9	O=C2-C3H2
frg_10	C3H2-C3H-C3H2
frg_11	OH-C2=O
frg_12	C3H3-[N3+]-C3H2
frg_13	C3H3-[N3+]-C3H3
frg_14	OH-C3H-C2H
frg_15	OH-C3H-C3H
frg_16	C3H-C3H-C2
frg_17	C3H-C2H=C2H
frg_18	C2H=C2H-C2H
frg_19	C3H-C3H-C2H
frg_20	C2H-C2H=C2
frg_21	C3H-C2=C2H
frg_22	C2H=C2-C2
frg_23	OH-C2-C2
frg_24	O=C2-C2
frg_25	OH-C3H-C2
frg_26	C3H-C2-C2
frg_27	OH-C3H-C3H3
frg_28	C3H3-C3H-C3H2
frg_29	N3H2-C3H2-C3H
frg_30	OH-C3H-C3H2
frg_31	N3H2-C3H2-C2
frg_32	C3H2-C2-C3H2
frg_33	O-C3H2-C2
frg_34	P3-O-C3H2
frg_35	OH-P3-O
frg_36	O=P3-O
frg_37	OH-P3-OH
frg_38	OH-P3=O
frg_39	Cl-c:cH
frg_40	Cl-c:c
frg_41	cH:c:c
frg_42	N_Pl3-c:c
frg_43	cH:cH:c
frg_44	cH:c:cH
frg_45	N_Pl3-c:cH
frg_46	O=N_Pl3-c
frg_47	c:cH:c
frg_48	O=N_Pl3=O
frg_49	n-C3H2-C3H3
frg_50	cH:n-C3H2
frg_51	C3H2-n:[c.]
frg_52	n:[c.]:n
frg_53	n:[c.]:[c.]
frg_54	n:cH:n
frg_55	cH:n:[c.]
frg_56	n:[c.]:c
frg_57	N3H2-c:[c.]
frg_58	n:c:[c.]
frg_59	cH:n:c
frg_60	c:[c.]:[c.]
frg_61	N3H2-c:n
frg_62	C3H3-C3H2-C3
frg_63	C3H3-C3-C3H2
frg_64	OH-C3-C3H2
frg_65	C3H2-C3-C3H
frg_66	OH-C3H-C3
frg_67	C3-C3H-C2
frg_68	OH-C3-C3H3
frg_69	C3H3-C3-C3H
frg_70	OH-C3-C3H
frg_71	OH-C2-C3H
frg_72	O=C2-C3H
frg_73	C3H-C3H-C3H
frg_74	O-C3H-C3H
frg_75	P3-O-C3H
frg_76	N3H2-C2-N3H
frg_77	N3H2-C2=N2
frg_78	C2=N2-C2
frg_79	C2-N3H-C2
frg_80	N3H-C2-N3H
frg_81	N3H-C2=C2
frg_82	N3H-C2=N2
frg_83	C2=C2-C2
frg_84	C3H2-N3H-C2
frg_85	N3H-C3H2-C3H
frg_86	N3H-C3H-C3H2
frg_87	C3H-N3H-C2
frg_88	N3-C3H2-C3H
frg_89	C3H2-N3-C2H
frg_90	C3H2-N3-c
frg_91	N3-c:cH
frg_92	O=C2H-N3
frg_93	C2H-N3-c
frg_94	cH:c-C2
frg_95	O=C2-c
frg_96	N3H-C2-c
frg_97	O=C2-N3H
frg_98	N3H-C3H-C2
frg_99	C3H2-C3H2-C3H
frg_100	C3H2-C3H2-C2
frg_101	C3H2-C3H-C2
frg_102	N3H-C2-C2
frg_103	N2-C2-C2
frg_104	O=C2-N2
frg_105	Cl-C3H2-C3H2
frg_106	OH-c:cH
frg_107	OH-c:c
frg_108	c:c:c
frg_109	C3H3-C3H2-C3H2
frg_110	C3H2-C3H2-C3H2
frg_111	C3H2-C2-C2H
frg_112	C2H=C2H-C2
frg_113	O=C2-C2H
frg_114	C3H2-C3H-C3H
frg_115	C3H2-C2-C3H
frg_116	C3H2-C3H-C3
frg_117	C3H-C3H-C3
frg_118	C3H2-C3H2-C3
frg_119	C3H-C3-C3H
frg_120	N3H-C2-C3H2
frg_121	N3H-C3H2-C3H2
frg_122	N2-C3H-C2
frg_123	C3H-N2=C2
frg_124	C3H-C3H2-C2H
frg_125	C3H2-C2H=C2H
frg_126	N2-C3H-C3H2
frg_127	N2=C2-C2H
frg_128	C2H-C2-C2
frg_129	N2=C2-C2
frg_130	OH-C3H2-C3H
frg_131	C2-C2-C2
frg_132	OH-C2-c
frg_133	C2-c:c
frg_134	cH:cH:cH
frg_135	C3H2-C3H2-c
frg_136	cH:c-C3H2
frg_137	C3H2-c:c
frg_138	C3H2-C3-C2
frg_139	OH-C2-C3
frg_140	O=C2-C3
frg_141	C3H3-C2-C3
frg_142	OH-C3-C2
frg_143	C2-C3-C2
frg_144	C3H3-C3-C2
frg_145	N3H2-C2-C2
frg_146	N3H2-C2=C2
frg_147	C2H-C2=C2
frg_148	O=C2H-C2H
frg_149	N3H-C2-C3H
frg_150	N3-C3H-C2
frg_151	C3H-N3-C3
frg_152	OH-N3-C3H
frg_153	N2-C3H-C3H
frg_154	N3-C3H-C3H
frg_155	C3H-N3-C3H
frg_156	N3-C3H-N2
frg_157	OH-C3H-N3
frg_158	N3-C3H-C3
frg_159	N3-C3-C3H
frg_160	OH-N3-C3
frg_161	OH-C3-N3
frg_162	N3H-C2-N3
frg_163	OH-N3-C2
frg_164	C3H-N3-C2
frg_165	N3-C2=C2
frg_166	N3H-C3H-C3H
frg_167	C3H3-C2-C2
frg_168	N2=C2-C3H
frg_169	N2-C2=C2
frg_170	C3H-C2-C3H
frg_171	O-C3H2-C3H
frg_172	O-P3-O
frg_173	P3-O-P3
frg_174	N3H2-C2=C2H
frg_175	OH-C2-C2H
frg_176	N3H2-C3H-C2H
frg_177	N3H2-C3H-C2
frg_178	O=C2H-C3H
frg_179	C2H-C3H-C2
frg_180	OH-C3H2-C3
frg_181	Cl-C3H2-C2H
frg_182	O=C2H-C3H2
frg_183	OH-C3H2-C3H2
frg_184	C3-C3H2-C2
frg_185	Cl-C3-C3H2
frg_186	O-C3-C3H2
frg_187	C3H2-C3-C2H
frg_188	C3-C2H=C2H
frg_189	C3-O-C2
frg_190	O-C3-Cl
frg_191	Cl-C3-C2H
frg_192	O-C2-C2H
frg_193	O-C3-C2H
frg_194	C3H3-C3H-C3H3
frg_195	C3H3-C3H-C3H
frg_196	C3H2-C2-C2
frg_197	C3H3-C3-C3H3
frg_198	C3-C2-C2
frg_199	O-C3H2-C3
frg_200	C3H2-O-C2
frg_201	O-C2-C2
frg_202	C3H-O-C3H
frg_203	OH-C3H-O
frg_204	C3H-C3H2-C3H
frg_205	C3H3-S3-C3H2
frg_206	S3-C3H2-C3H2
frg_207	O-C2H=C2
frg_208	OH-C2=C2H
frg_209	P3-O-C2H
frg_210	C2-C3H-C2
frg_211	C3H3-C3H2-C3H
frg_212	C3H3-C3H-C2
frg_213	O=C2-N3H2
frg_214	N3H2-C2-C3H2
frg_215	S3-C2-C3H
frg_216	C3H2-S3-C2
frg_217	S3-C2=O
frg_218	O-C3H-n
frg_219	cH:n-C3H
frg_220	C3H-n:[c.]
frg_221	n-C3H-C3H
frg_222	C3H3-C2-C3H
frg_223	C3H3-C2-C3H3
frg_224	C3H3-C2=C2H
frg_225	C3H2-C2H=C2
frg_226	C3H2-C3H2-C2H
frg_227	C3H3-C2-C3H2
frg_228	C3H2-C2=C2H
frg_229	C2H-C3H2-c
frg_230	C3H3-O-c
frg_231	O-c:cH
frg_232	O-c:c
frg_233	C3H3-C2H=C2H
frg_234	C3H3-C3H2-C2
frg_235	O-C3H-C2
frg_236	O-C3-C3H3
frg_237	P3-O-C3
frg_238	O-C3-C3H
frg_239	O-C3H-N3
frg_240	C3H-N3-C2H
frg_241	N3-C2-N2
frg_242	O=C2-N3
frg_243	N3-C2H=C2H
frg_244	C2H-N3-C2
frg_245	N3H2-C2-C2H
frg_246	Cl-C2-C3H
frg_247	C3H-C2H=C2
frg_248	Cl-C2=C2H
frg_249	Cl-C3H-C2
frg_250	Cl-C3H-C2H
frg_251	N3H2-C3H-C3H3
frg_252	N3H2-C3H-C3H2
frg_253	OH-C3H2-C2
frg_254	C3H3-C2-C2H
frg_255	C2-C3H2-C2
frg_256	S3-C2-C3H2
frg_257	N3H2-C3H2-C3H2
frg_258	C3H2-C2-C3
frg_259	C3H-C3-C2
frg_260	C3-C2=C2H
frg_261	C3H3-C3H-C3
frg_262	Cl-C3H2-C3H
frg_263	N1#C1-c
frg_264	cH:c-C1
frg_265	n:cH:c
frg_266	n:cH:cH
frg_267	cH:n:cH
frg_268	C2=C2H-C2
frg_269	C3H-C2-C2H
frg_270	O-C3H-C2H
frg_271	O-C2=C2H2
frg_272	C2H2=C2-C2
frg_273	P3H-C3H2-C2
frg_274	OH-P3H-C3H2
frg_275	O=P3H-C3H2
frg_276	OH-P3H=O
frg_277	C3H2-C3-C3H2
frg_278	N3H2-c:c
frg_279	C3H2-C2-c
frg_280	c:cH:[c.]
frg_281	cH:cH:[c.]
frg_282	n:[c.]:cH
frg_283	cH:[c.]:[c.]
frg_284	cH:c-C3H
frg_285	cH:c:[c.]
frg_286	cH:[c.]:c
frg_287	OH-C3H-c
frg_288	C3H-C3H-c
frg_289	C3H-c:[c.]
frg_290	C3H2-N3-C3H
frg_291	N3-C3H-C3H2
frg_292	C3H-C3-C2H
frg_293	N3-C3H2-C3H2
frg_294	C3H2-N3-C3H2
frg_295	N3-C3H2-C3
frg_296	C3-C2H=C2H2
frg_297	OH-C3-C2H
frg_298	O-C3H-O
frg_299	S3H-C3H2-C2
frg_300	S3-C2-C2H
frg_301	cH:c-C2H
frg_302	O=C2H-c
frg_303	OH-C3H2-c
frg_304	O-C2-C3H2
frg_305	C2-O-C2
frg_306	O-C2=C2H
frg_307	C2H-C3H2-C2
frg_308	C2-C3H2-c
frg_309	S3-C3H2-C3H
frg_310	OH-S3-C3H2
frg_311	O=S3-C3H2
frg_312	OH-S3=O
frg_313	S3-C3H2-C2
frg_314	N3H2-C3H-C3H
frg_315	C3H2-O-C3H
frg_316	C2H=C2-C2H
frg_317	nH:c:c
frg_318	nH:c-C2
frg_319	nH:cH:n
frg_320	cH:nH:c
frg_321	n:c:c
frg_322	N3H2-C2-N3H2
frg_323	C3H2-N2=C2
frg_324	N2-C3H2-C3H2
frg_325	C3H-N2=C2H
frg_326	N3H-C2H=N2
frg_327	C2H-N3H-C2
frg_328	S3H-C3H2-C3H
frg_329	C3H2-C3H2-[N3+]
frg_330	C2=C2-[N_Pl3+]
frg_331	C3H2-C3H-[N_Pl3+]
frg_332	C3H-[N_Pl3+]=C2H
frg_333	C3H-[N_Pl3+]-C2
frg_334	N3-C2H=[N_Pl3+]
frg_335	C2H=[N_Pl3+]-C2
frg_336	C2-C2-[N_Pl3+]
frg_337	N3H-C2-C2H
frg_338	O-C3H-C3H3
frg_339	C3H2-N3H-c
frg_340	N3H-c:cH
frg_341	N3-C2-C2
frg_342	nH:[c.]:cH
frg_343	nH:[c.]:[c.]
frg_344	nH:cH:c
frg_345	cH:nH:[c.]
frg_346	C3H-C3H2-c
frg_347	C3H2-c:[c.]
frg_348	C3H3-N3-C3H
frg_349	C3H3-N3-C2
frg_350	C3H3-N3H-C3H2
frg_351	N3H-C3H2-C2
frg_352	N3-C2H=C2
frg_353	Se-C2-N3
frg_354	N3-C2=N2
frg_355	Se-C2=N2
frg_356	S3H-C2-N3
frg_357	S3H-C2=N2
frg_358	O-C3H-N3H2
frg_359	O-C3H-N3H
frg_360	C3H2-N3H-C2H
frg_361	O=C2H-N3H
frg_362	N3H2-c:cH
frg_363	C3H-n:c
frg_364	n:c:cH
frg_365	N2=C2-C3H2
frg_366	O-C3H-N2
frg_367	N3H-c:n
frg_368	C2-N3H-c
frg_369	N3H-c:c
frg_370	C3H2-C3H-C2H
frg_371	C3H2-N3H-C3H
frg_372	N3H-C3H-N2
frg_373	S3-C3-C3H3
frg_374	C3-C3H-[N3^]
frg_375	C3-S3-[C3^H]
frg_376	S3-[C3^H]-[C3^H]
frg_377	S3-[C3^H]-[N3^]
frg_378	S3-C3-C3H
frg_379	[C3^H]-[N3^]-[C2^]
frg_380	C3H-[N3^]-[C3^H]
frg_381	N3H2-[C3^H]-[C3^H]
frg_382	[C3^H]-[C3^H]-[C2^]
frg_383	O=[C2^]-[C3^H]
frg_384	[N3^]-[C2^]-[C3^H]
frg_385	[N3^]-[C3^H]-[C3^H]
frg_386	N3H2-[C3^H]-[C2^]
frg_387	C3H-[N3^]-[C2^]
frg_388	O=[C2^]-[N3^]
frg_389	C2-C3H-[N3^]
frg_390	C2=C2H-[N1+]
frg_391	N1#[N1+]-C2H
frg_392	N2=C2-N2
frg_393	C2H=N2-C2
frg_394	N2=C2H-N2
frg_395	C2H=N2-C2H
frg_396	N2=C2H-C2
frg_397	nH:c-N3H
frg_398	N3H2-C3H2-c
frg_399	N2-C2-c
frg_400	OH-C2-C3H3
frg_401	O=C2H-C3H3
frg_402	N3H2-C2-C3H3
frg_403	S3-C2-C3H3
frg_404	O-C3H2-C2H
frg_405	N3H-C2-C3H3
frg_406	P3-O-C2
frg_407	O-C3H2-C3H2
frg_408	nH:[c.]:c
frg_409	C3H2-S3-C3H2
frg_410	N3H-c:[c.]
frg_411	C3H-N3H-c
frg_412	N3H2-C2-c
frg_413	n:c-C2
frg_414	N3H-C3H-N3H
frg_415	N3H2-C2-C3H
frg_416	C3H-O-C3
frg_417	O-C3-O
frg_418	O-C3-C2
frg_419	C3H-C3H2-C3
frg_420	cH:c-C3H3
frg_421	C3H3-c:c
frg_422	C3H-C3H-[C3^H]
frg_423	C3H-O-[C3^H]
frg_424	O-[C3^H]-[C3^H2]
frg_425	O-[C3^H]-[O^]
frg_426	[C3^H]-[O^]-[C3^H]
frg_427	[C3^H]-[C3^H2]-[C3^H]
frg_428	[O^]-[C3^H]-[C3^H2]
frg_429	C3H-[C3^H]-[C3^H2]
frg_430	C3H2-C3H-[C3^H]
frg_431	C3H-[C3^H]-[O^]
frg_432	n:c-C3H3
frg_433	c:n:c
frg_434	n:c:n
frg_435	O-C3H2-c
frg_436	O-C3H2-C3H3
frg_437	S2=P3-O
frg_438	P3-O-c
frg_439	OH-C3H-N3H2
frg_440	P3H2-C3H-N3H2
frg_441	P3H2-C3H-OH
frg_442	S3-O-P3
frg_443	OH-S3-O
frg_444	O=S3-O
frg_445	O=S3=O
frg_446	C2H-C3H2-C2H
frg_447	OH-As-OH
frg_448	OH-As=O
frg_449	OH-C2-O
frg_450	O-C2=C2
frg_451	OH-C2=C2
frg_452	N3-C3H2-C3H3
frg_453	N3H-C3H-C3H3
frg_454	[c.]:c:[c.]
frg_455	[c.]:n:[c.]
frg_456	S3-O-C3H
frg_457	C2-C3H2-[N3+]
frg_458	C2H-C3H2-[N3+]
frg_459	nH:c-C2H
frg_460	nH:c-C3H2
frg_461	c-C3H2-c
frg_462	c:nH:c
frg_463	C2H-c:c
frg_464	C2=C2H-c
frg_465	N3H-C2=C2H
frg_466	C3H3-C2=C2
frg_467	C2H2=C2H-C2
frg_468	C3H2-C2=C2
frg_469	S3-C3H-C3H2
frg_470	C3H2-S3-C3H
frg_471	S3-C3H-C3H
frg_472	cH:c-c
frg_473	c:c-c
frg_474	C3H3-N3-C3H2
frg_475	N3H2-C2-N3
frg_476	N3-C2=N2H
frg_477	C3H2-N3-C2
frg_478	N3H-C3H-C2H
frg_479	N3-C3H-C2H
frg_480	N3H2-C2=N2H
frg_481	N2-O-C3H2
frg_482	O-N2=C2
frg_483	OH-C2-N3H2
frg_484	O-C2-N3H2
frg_485	O=C1=O
frg_486	OH-C2H=O
frg_487	N3H2-O-C3H2
frg_488	C3H3-C3H-C2H
frg_489	Cl-C3H-Cl
frg_490	Cl-C3-Cl
frg_491	Cl-C3-[C3^]
frg_492	C3-[C3^]-[C3^]
frg_493	Cl-[C3^]-C3
frg_494	[C3^]-[C3^]-[C3^]
frg_495	Cl-[C3^]-[C3^]
frg_496	[C3^]-C3-[C3^]
frg_497	C2-[C3^]-[C3^]
frg_498	O=C2-[C3^]
frg_499	[C3^]-C2-[C3^]
frg_500	Cl-[C3^]-C2
frg_501	Cl-C3H2-C2
frg_502	C2H=C2H-c
frg_503	OH-C3H2-C2H
frg_504	S3H-C3H2-C3H2
frg_505	N2=C2-C3
frg_506	C3H-C2-C3
frg_507	N2-C3-C3H
frg_508	C3H-C3-C3
frg_509	N2-C3H-C3
frg_510	N2-C2-C3
frg_511	C3-C2=C2
frg_512	C3-N2=C2
frg_513	N2-C3-C3H3
frg_514	N2-C3-C3
frg_515	C3H3-C3-C3
frg_516	C3H2-C3-C3
frg_517	n:c-C3H
frg_518	C3H2-C3H-c
frg_519	N2-C3H2-C3H
frg_520	C3H-c:c
frg_521	C3H2-N2=C2H
frg_522	C2H-N3H-c
frg_523	C2-O-c
frg_524	C3H3-C3H-c
frg_525	nH:c:cH
frg_526	C2-C2-c
frg_527	C2=C2-c
frg_528	C2-C3H-c
frg_529	C3H-C2=C2
frg_530	C2H2=C2H-c
frg_531	OH-C3H-N3H
frg_532	P3-C3H2-C3H2
frg_533	OH-P3-C3H2
frg_534	O=P3-C3H2
frg_535	O-C2-c
frg_536	C3H-O-c
frg_537	S3-S3-C3H2
frg_538	O-C2-C3H
frg_539	N3H-C2H=C2
frg_540	O-c:n
frg_541	N3-C2-C3H
frg_542	C2-N3-c
frg_543	N3-C2=C2H
frg_544	N3-c:c
frg_545	C3H3-N3-c
frg_546	N3H2-C3H2-C2H
frg_547	C3H3-C2-c
frg_548	C2H=C2-c
frg_549	C2H-C2-C2H
frg_550	C3H2-N3H-C3H2
frg_551	P3-O-[P3+]
frg_552	OH-[P3+]-O
frg_553	O-[P3+]-O
frg_554	C3H-O-[P3+]
frg_555	OH-[P3+]-OH
frg_556	OH-C2-C1
frg_557	C2-C1#C1
frg_558	O=C2-C1
frg_559	OH-C2-OH
frg_560	S3-C2-c
frg_561	C3H-N3H-C3H
frg_562	N2-C2=C2H
frg_563	S3-C3H-c
frg_564	S3-C3H-C3H3
frg_565	C3H3-N3H-C2
frg_566	S3-C3H-C2
frg_567	N2-C3H-C2H
frg_568	N_Pl3-C3H-C3H3
frg_569	O=N_Pl3-C3H
frg_570	N3H-O-C3H2
frg_571	O-N3H-C2
frg_572	OH-N3H-C3H2
frg_573	OH-P3H-OH
frg_574	N3-C2-C3H2
frg_575	N3-C3H-c
frg_576	O=N3-C3H3
frg_577	O=N3-C3H2
frg_578	O=N3-C3H
frg_579	c:cH:[n+]
frg_580	cH:cH:[n+]
frg_581	cH:[n+]:cH
frg_582	cH:[n+]-C3H
frg_583	O-C3H-[n+]
frg_584	C3H-C3H-[n+]
frg_585	N3H-C3H-c
frg_586	C3H3-N3-C3
frg_587	N3-C3-C3H2
frg_588	N3-C3-c
frg_589	C3-N3-C2
frg_590	C3H2-C3-c
frg_591	cH:c-C3
frg_592	OH-C3-c
frg_593	Cl-C2-C2H
frg_594	S3H-C3H-C3H2
frg_595	C2H-C2-c
frg_596	N3H-C2-N2
frg_597	cH:[n+]-C3H3
frg_598	C3H3-[N_Pl3+]=C2H
frg_599	C3H3-[N_Pl3+]-C3H
frg_600	c-C3H-[N_Pl3+]
frg_601	C3H2-C2H=[N_Pl3+]
frg_602	C3H2-N3-C3
frg_603	OH-C3H2-N3
frg_604	C3H-C2-c
frg_605	C3H-N3H-C3
frg_606	N3H-C3-C3H3
frg_607	N3H-C3-C3H2
frg_608	C3H3-[S3+]-C3H3
frg_609	C3H3-[S3+]-C3H2
frg_610	C3H2-C3H2-[S3+]
frg_611	S3H-C2-C3H
frg_612	S3H-C2=C2
frg_613	C2=C2H-[C3^H]
frg_614	C2H-[C3^H]-[C3^H]
frg_615	C2H-[C3^H]-[C3^]
frg_616	[C3^H]-[C3^]-[C3^H]
frg_617	C3H3-[C3^]-[C3^H]
frg_618	C3H2-[C3^]-[C3^H]
frg_619	C3H2-[C3^H]-[C3^H]
frg_620	[C3^H]-[C3^H]-[C3^]
frg_621	O-C3H2-[C3^H]
frg_622	C3H2-[C3^H]-[C3^]
frg_623	C3H2-C3H2-[C3^]
frg_624	C3H3-[C3^]-C3H2
frg_625	O-C3H-c
frg_626	C3H3-N3-C3H3
frg_627	O-N3-C3H3
frg_628	P3-O-N3
frg_629	nH:c-N3H2
frg_630	S3-O-C3H2
frg_631	C3H2-S3-C2H
frg_632	S3-C2H=O
frg_633	S3-N3H-C3H
frg_634	OH-S3-N3H
frg_635	O=S3-N3H
frg_636	P3-C3H2-C2H
frg_637	S3-S3-OH
frg_638	S3-S3-S3
frg_639	S3-S3=O
frg_640	N2-C3H2-C2
frg_641	N2-c:c
frg_642	C2=N2-c
frg_643	N2-c:cH
frg_644	c-C3H2-[n+]
frg_645	cH:[n+]-C3H2
frg_646	C3H2-[n+]:c
frg_647	c:c:[n+]
frg_648	C3H3-c:[n+]
frg_649	s:cH:[n+]
frg_650	cH:s:c
frg_651	cH:[n+]:c
frg_652	s:c-C3H2
frg_653	s:c:c
frg_654	N3H-C2-C3
frg_655	C3-c:c
frg_656	C3H3-C3-c
frg_657	C3-C3-c
frg_658	nH:c-C3
frg_659	O-C3-C3
frg_660	C3-C3-C3
frg_661	OH-C3-C3
frg_662	O-C3-N2
frg_663	N2-C2-C3H2
frg_664	C3-C2-C2H
frg_665	C3-N3H-C2
frg_666	N3H-C3-C2
frg_667	N3H-C3-C3
frg_668	C3-C3-C2
frg_669	N2-C3-C3H2
frg_670	N2-C3-C2
frg_671	C3H3-C3H2-C2H
frg_672	N3-C2H=N2H
frg_673	N3H-C3-C3H
frg_674	N3H-C3H-C3
frg_675	N3H2-[C3^]-[C3^H2]
frg_676	N3H2-[C3^]-C2
frg_677	OH-C2-[C3^]
frg_678	[C3^H2]-[C3^H2]-[C3^]
frg_679	[C3^H2]-[C3^]-[C3^H2]
frg_680	C2-[C3^]-[C3^H2]
frg_681	C3-C2=C2H2
frg_682	OH-C1#N1
frg_683	C2H-C3-C2
frg_684	P3-C3H2-C2
frg_685	OH-C2H=C2
frg_686	O-C3-N3H
frg_687	O=C2H-C3
frg_688	N3H-C3-C2H
frg_689	C3H3-[N3+]-C3H
frg_690	C3H2-C3H-[N3+]
frg_691	C2-C3H-[N3+]
frg_692	C3H2-[N3+]-C3H
frg_693	Hg-c:cH
frg_694	[c.]:[c.]:[c.]
frg_695	o:[c.]:[c.]
frg_696	[c.]:o:[c.]
frg_697	o:[c.]:cH
frg_698	C3H-S3-C2
frg_699	C3-O-c
frg_700	OH-C3-O
frg_701	N3-C3H2-C2
frg_702	P3-N2=C2
frg_703	OH-P3-N2
frg_704	O=P3-N2
frg_705	N2=C2H-C2H
frg_706	nH:c-C3H
frg_707	n-C3H-C3H2
frg_708	S2=P3-OH
frg_709	c:c:[c.]
frg_710	OH-c:[c.]
frg_711	N2-C2-C3H3
frg_712	C2-N3-C2
frg_713	N3-C2-C3H3
frg_714	C3H3-N3H-C3H3
frg_715	C3H3-S3-C3H3
frg_716	O=S3-C3H3
frg_717	N2=C2-C3H3
frg_718	C3H2-C3H2-[C3^H]
frg_719	C3H2-[C3^H]-[O^]
frg_720	[O^]-[C3^]-[C3^H]
frg_721	[C3^H]-[O^]-[C3^]
frg_722	C3H3-[C3^]-[O^]
frg_723	[O^]-[C3^H]-[C3^]
frg_724	C3H3-[C3^]-C3H3
frg_725	OH-N2=C2H
frg_726	N2=C2H-c
frg_727	S3-O-c
frg_728	OH-C3H2-C3H3
frg_729	O=C2H-N3H2
frg_730	C3H2-O-c
frg_731	o:cH:c
frg_732	cH:o:c
frg_733	o:c-C3H2
frg_734	o:c:cH
frg_735	N3H-C3H2-c
frg_736	Cl-C3H-C3H
frg_737	S3H-S3-C3H2
frg_738	O=C2H-C2
frg_739	S3H-C1#N1
frg_740	O=S3H-C3H2
frg_741	O=S3H=O
frg_742	nH:cH:cH
frg_743	cH:nH:cH
frg_744	N2H=C2-C3H2
frg_745	N2H=C2-C2
frg_746	cH:[c.]:cH
frg_747	C3H2-C2=C2H2
frg_748	C3H2-O-C3
frg_749	Se-C3H2-C3H
frg_750	I-c:cH
frg_751	I-c:c
frg_752	c-O-c
frg_753	C3-C3H-C3
frg_754	[O^]-[C3^H]-[C3^H]
frg_755	C2H-[C3^H]-[O^]
frg_756	C2H=C2H-[C3^H]
frg_757	S3-C3H-C2H
frg_758	S3-S3-C3H
frg_759	C3H3-C2=C2H2
frg_760	S3-C2-C2
frg_761	N3-C3H2-N3
frg_762	N3-C3H-C3H3
frg_763	C3H-N3-c
frg_764	C3H3-O-C2
frg_765	N3H2-C2H=N2
frg_766	C3H-N3H-C2H
frg_767	N3H-C3H2-N3
frg_768	N3H2-C3H-N3
frg_769	N3H2-C3H-c
frg_770	C2H-N3-C2H
frg_771	OH-N_Pl3=O
frg_772	OH-N2=O
frg_773	O=N1#N1
frg_774	O=N3-c
frg_775	C3H2-C2H=C2H2
frg_776	N3H2-c:[n+]
frg_777	C3H-[n+]:c
frg_778	[n+]:c:[c.]
frg_779	n:cH:[n+]
frg_780	N2-C2-C2H
frg_781	nH:c-c
frg_782	C2H-C3H-C2H
frg_783	C2H-C3-C2H
frg_784	O-O-C3H
frg_785	C3H-C2H=C2H2
frg_786	N2-C2-C3H
frg_787	n:cH:[c.]
frg_788	nH:n:cH
frg_789	n:nH:cH
frg_790	N3H-C2H=C2H
frg_791	N3H-C3H2-N2
frg_792	N2=C2H-C3H
frg_793	N3H2-C2-N2
frg_794	C3H2-S3-c
frg_795	S3-c:cH
frg_796	S3-c:c
frg_797	c:c-[N_Pl3+]
frg_798	cH:c-[N_Pl3+]
frg_799	OH-[N_Pl3+]-c
frg_800	O=[N_Pl3+]-c
frg_801	OH-[N_Pl3+]=O
frg_802	C3H-C3H2-[S3+]
frg_803	C3H2-[S3+]-C3H2
frg_804	OH-S3-OH
frg_805	S2=S3-OH
frg_806	S2=S3=O
frg_807	S3H-S3-OH
frg_808	S3H-S3=O
frg_809	OH-Se-OH
frg_810	OH-Se=O
frg_811	O=Se=O
frg_812	Se=P3-OH
frg_813	OH-[S3^+]=O
frg_814	OH-[S3^+]-[C3^H2]
frg_815	[S3^+]-[C3^H2]-[C3^H2]
frg_816	O=[S3^+]-[C3^H2]
frg_817	[C3^H2]-[S3^+]-[C3^H2]
frg_818	O=S2=O
frg_819	s:cH:n
frg_820	C3H3-C2H=C2
frg_821	OH-W-OH
frg_822	OH-W=O
frg_823	O=W=O
frg_824	O-C3H2-N3H
frg_825	OH-P3H-O
frg_826	P3H-O-P3H
frg_827	O=P3H-O
frg_828	N2=C2H-C3H2
frg_829	O=S3-c
frg_830	N3-S3-c
frg_831	S3-N3-C3H2
frg_832	S3-N3-c
frg_833	O=S3-N3
frg_834	C3H3-C3-C2H
frg_835	C3H-C3H2-[C3^H]
frg_836	C3H2-[C3^H]-[C3^H2]
frg_837	[C3^H2]-[C3^H]-[C3^H2]
frg_838	n:c-Cl
frg_839	C3H3-N3H-C3H
frg_840	N3H-C3-c
frg_841	c-C3-c
frg_842	C3H-C3-c
frg_843	O-N3-C3H2
frg_844	N3-O-C2
frg_845	O-C2-N3H
frg_846	O-N3-C2
frg_847	c-C3H-[N3+]
frg_848	nH:n:c
frg_849	nH:n:n
frg_850	n:n:c
frg_851	n:nH:n
frg_852	n:c-c
frg_853	N3H2-C3-c
frg_854	C2-C3-c
frg_855	N3H2-C3-C3H3
frg_856	N3H2-C3-C2
frg_857	[C3^H]-[C3^H2]-[C3^]
frg_858	C2-[C3^H]-[C3^H2]
frg_859	OH-C2-[C3^H]
frg_860	O=C2-[C3^H]
frg_861	c-C3H-c
frg_862	N3H-O-C2
frg_863	N3-C3H2-[C3^]
frg_864	OH-[C3^]-C3H2
frg_865	C3H2-[C3^]-[C3^H2]
frg_866	OH-[C3^]-[C3^H2]
frg_867	N3-C3H2-C2H
frg_868	C3H2-[C3^]-C2
frg_869	C2-[C3^]-[O^]
frg_870	[C3^H2]-[O^]-[C3^]
frg_871	[O^]-[C3^H2]-[C3^]
frg_872	C3H2-[C3^]-[O^]
frg_873	[O^]-[C3^]-[C3^H2]
frg_874	OH-N3-C3H2
frg_875	C3H2-C3-C1
frg_876	N1#C1-C3
frg_877	C3H-C3-C1
frg_878	C1-C3-c
frg_879	c-S3-c
frg_880	O-c:[c.]
frg_881	C3H2-N3H-C3
frg_882	C2-C3H2-Br
frg_883	cH:c-Br
frg_884	c:c-Br
frg_885	S3H-C2-N3H
frg_886	N3-C3H2-[C3^H]
frg_887	O-C3H-C3
frg_888	[C3^H2]-[C3^H2]-[C3^H]
frg_889	C3H-C3H-[N3+]
frg_890	O-C3H2-O
frg_891	N3-C3H-N3
frg_892	C3H-C2=C2H2
frg_893	N3H2-C3-C3H2
frg_894	C3-C3H-C2H
frg_895	n:nH:c
frg_896	N3-C3H-[C3^H]
frg_897	C3H-[C3^H]-[C3^H]
frg_898	S3-N3-C3H
frg_899	OH-N3H-C2
frg_900	N3H-S3-C3H3
frg_901	OH-B-OH
frg_902	OH-B-C3H
frg_903	C3H2-C3H-B
frg_904	N3H-C3H-B
frg_905	s:c-C2
frg_906	N2=C2-c
frg_907	c:s:c
frg_908	s:c:cH
frg_909	n-C3H2-c
frg_910	n:n-C3H2
frg_911	n:n:n
frg_912	n:n:cH
frg_913	N3-c:[c.]
frg_914	C1-c:c
frg_915	C3H2-n:c
frg_916	n:c-C3H2
frg_917	C3H-S3-C3
frg_918	S3-C3H-N3H
frg_919	nH:c:n
frg_920	N3H2-C3H-[C3^H]
frg_921	[C3^H2]-[C3^H]-[C3^H]
frg_922	C2-[C3^H]-[C3^H]
frg_923	C2-C3H-[C3^H]
frg_924	S3-N3H-C3H2
frg_925	N3H-S3-c
frg_926	S3-N3H-C2
frg_927	C3H3-C3H2-[C3^H]
frg_928	C3H2-[C3^H]-[C2^]
frg_929	S3-[N3^]-[C3^H]
frg_930	O=S3-[N3^]
frg_931	c-S3-[N3^]
frg_932	C2-[C3^H]-[N3^]
frg_933	S3-[N3^]-[C2^]
frg_934	P3-C3H-C3H2
frg_935	OH-P3-C3H
frg_936	O=P3-C3H
frg_937	P3-C3H-O
frg_938	O=S3-C3H
frg_939	C3H-S3-c
frg_940	S3-c:s
frg_941	N3H2-S3-c
frg_942	O=S3-N3H2
frg_943	c:n:[c.]
frg_944	c:nH:[c.]
frg_945	N2H=C2-c
frg_946	I-C3H-C3H2
frg_947	I-C3H-C2
frg_948	C2-C2-[N3^]
frg_949	C2-[N3^]-[C2^]
frg_950	C2-[N3^]-[C3^H]
frg_951	S3-C2H=C2
frg_952	C2H-S3-[C3^H]
frg_953	C2H=C2-[N3^]
frg_954	C3H3-C3H-[C3^H]
frg_955	O-C3H-[C3^H]
frg_956	C3H-[C3^H]-[C2^]
frg_957	c:[c.]:c
frg_958	P3H-C3H2-N3H
frg_959	N3H-C3H2-C3H3
frg_960	C3H3-O-C3H2
frg_961	O-P3-C3H3
frg_962	O-P3-Cl
frg_963	Cl-P3-C3H3
frg_964	O=P3-C3H3
frg_965	O=P3-Cl
frg_966	O-C2-N3
frg_967	F-C2=C2H
frg_968	F-C2-C2
frg_969	I-C2=C2H
frg_970	I-C2-C2
frg_971	S3-C3H2-C2H
frg_972	N2-c:n
frg_973	C2H-n:c
frg_974	cH:n-C2H
frg_975	N2=C2H-n
frg_976	C2H=N2-c
frg_977	F-C3-C2
frg_978	F-C3-F
frg_979	O-P3-C3
frg_980	P3-C3-F
frg_981	P3-C3-C3H2
frg_982	OH-P3-C3
frg_983	O=P3-C3
frg_984	F-C3-C3H2
frg_985	C3H2-[N3+]-C3H2
frg_986	c-C2-c
frg_987	N3H-N3H-C3H3
frg_988	N3-C2-c
frg_989	N3-C2-N3
frg_990	N3-c:n
frg_991	C3H3-n:c
frg_992	cH:n-C3H3
frg_993	S3-C2-N3H2
frg_994	S3-C2=N2H
frg_995	C3H-C3H-[C2+]
frg_996	C3H2-C3H-[C2+]
frg_997	C3H-[C2+]-[O+]
frg_998	C3H-[C2+]-C3H
frg_999	C3H-C2=[OH+]
frg_1000	C3H3-[N3+]-c
frg_1001	cH:c-[N3+]
frg_1002	C3H2-[N3+]-c
frg_1003	N3H-N3H-C2
frg_1004	C3-O-C3
frg_1005	c-c:[c.]
frg_1006	c-N3H-c
frg_1007	S3H-c:n
frg_1008	F-c:cH
frg_1009	c:c-[C3^H]
frg_1010	F-c:c
frg_1011	c-[C3^H]-[C3^H2]
frg_1012	c-[C3^H]-[C3^H]
frg_1013	N3H-[C3^H]-[C3^H]
frg_1014	N3H-[C3^H]-[C3^H2]
frg_1015	C2-N3H-[C3^H]
frg_1016	S3-c:[c.]
frg_1017	S3-c:n
frg_1018	F-C3-c
frg_1019	n-c:c
frg_1020	n-c:cH
frg_1021	cH:n-c
frg_1022	n-C3H2-C3H2
frg_1023	OH-S3-c
frg_1024	N3H2-n:n
frg_1025	N3H2-n:[c.]
frg_1026	n:n:[c.]
frg_1027	N3-C3H2-c
frg_1028	N3H-N3H-C3H2
frg_1029	C3H2-O-C3H2
frg_1030	C3H3-O-C3H
frg_1031	P3-O-C3H3
frg_1032	N3-N3-C3H2
frg_1033	OH-N3-N3
frg_1034	N3-N3-N2
frg_1035	N3-N3-C3H3
frg_1036	O=N2-N3
frg_1037	OH-N3-N2
frg_1038	S3-C2=C2
frg_1039	S3H-C2-O
frg_1040	O-C2=N2
frg_1041	S3-N3-C3H3
frg_1042	N3-S3-C2
frg_1043	N3-C2=[c.]
frg_1044	n:[c.]=C2
frg_1045	C2=[c.]:[c.]
frg_1046	N3H2-C2=[c.]
frg_1047	N2=[c.]:[c.]
frg_1048	N2=[c.]:n
frg_1049	C2-N2=[c.]
frg_1050	s:c-N2
frg_1051	s:c:n
frg_1052	s:cH:cH
frg_1053	n:n-c
frg_1054	c:n-c
frg_1055	n:c-C3
frg_1056	n:n-C3
frg_1057	n-C3-C3H3
frg_1058	C3-n:[c.]
frg_1059	c-N3-c
frg_1060	N3-C3H2-C1
frg_1061	C3H2-C1#C1H
frg_1062	C2H-C3H2-[C3^H]
frg_1063	C3-C3H2-c
frg_1064	OH-O-C3H
frg_1065	N2-C3H-c
frg_1066	N1=N2-C3H
frg_1067	N2=N1#N1
frg_1068	S3H-C3H-c
frg_1069	S3H-C3H-C3H
frg_1070	C3H2-C3H2-C1
frg_1071	C3H2-C1#C1
frg_1072	C3H-C3H2-C1
frg_1073	C2H-C2=[c.]
frg_1074	C2=[c.]:c
frg_1075	C2-C2=[c.]
frg_1076	N2=[c.]:cH
frg_1077	Br-c:[c.]
frg_1078	N2-C3H2-c
frg_1079	OH-C3H-C1
frg_1080	C3H-C1#C1
frg_1081	C2H-C3H-C1
frg_1082	C1#C1-C1
frg_1083	C2H-C3H2-C1
frg_1084	C3-C3-C1
frg_1085	C3-C1#C1H
frg_1086	OH-C3-C1
frg_1087	N2-O-C2
frg_1088	N3-C2-C2H
frg_1089	[c.]:cH:[c.]
frg_1090	C3H3-O-C3
frg_1091	n-C3-C3
frg_1092	O-C3-n
frg_1093	cH:n-C3
frg_1094	F-C3H-C3H
frg_1095	F-C3H-C3H2
frg_1096	n-C3H-C2H
frg_1097	C3H-O-C2H
frg_1098	C3H2-C3H2-B
frg_1099	OH-B-C3H2
frg_1100	O=N2-C2
frg_1101	C3H3-C3H2-[n+]
frg_1102	C2-c:[n+]
frg_1103	c:[n+]:c
frg_1104	S3-N3H-c
frg_1105	N3H2-C3H-N3H
frg_1106	C3H-N3H-[C3^H]
frg_1107	[C3^H2]-[C3^H2]-[C3^H2]
frg_1108	o:c-c
frg_1109	c:o:c
frg_1110	o:n:c
frg_1111	n:o:c
frg_1112	n:n-C3H3
frg_1113	N3-N3-C3H
frg_1114	N3-N3-C2
frg_1115	N2H=C2-C3H
frg_1116	C2-c:[c.]
frg_1117	S3-N3-C2H
frg_1118	s:c-N3H
frg_1119	S3-C3H2-c
frg_1120	C2H-n:[c.]
frg_1121	n:c-C2H
frg_1122	n-C2H=C2H
frg_1123	N2-C2H=C2
frg_1124	C2H-N2=C2
frg_1125	C3H3-n:[c.]
frg_1126	S3-C2=N2
frg_1127	s:c-N3H2
frg_1128	S3H-c:[c.]
frg_1129	I-C3H2-C3H
frg_1130	C3H-C3H-C1
frg_1131	N1#C1-C3H
frg_1132	C2-C3H-C1
frg_1133	Cl-C3-C3H3
frg_1134	C3-C3H-Br
frg_1135	Cl-C3-C3H
frg_1136	C3H2-C3H-Br
frg_1137	C3-C3H2-Br
frg_1138	F-C3H-C2
frg_1139	OH-N3-c
frg_1140	N3H2-C3H2-C3
frg_1141	S3-C3H2-C3
frg_1142	cH:[n+]-[O-]
frg_1143	c:[n+]-[O-]
frg_1144	cH:c:[n+]
frg_1145	S3H-c:[n+]
frg_1146	S3H-c:cH
frg_1147	OH-N3-C2H
frg_1148	S2=C2-N3
frg_1149	S2=C2-C2H
frg_1150	nH:c-C3H3
frg_1151	[c.]:nH:[c.]
frg_1152	[n+]:cH:[c.]
frg_1153	C3H3-S3-c
frg_1154	N3-N3H-C2
frg_1155	N3H-N3-C3H2
frg_1156	N3H-N3-C2
frg_1157	N2-C2H=C2H
frg_1158	C3H2-O-B
frg_1159	O-B-c
frg_1160	cH:c-B
frg_1161	c-B-c
frg_1162	n-C3-C3H
frg_1163	N2-N3-C3H3
frg_1164	N2-N3-c
frg_1165	O-C2-Cl
frg_1166	Cl-C2=C2
frg_1167	Cl-C2-c
frg_1168	N3H-C3H2-C2H
frg_1169	N3-N2=C2
frg_1170	N2-N3-C3H2
frg_1171	N2-N3-C2
frg_1172	c:s:[c.]
frg_1173	s:[c.]:[c.]
frg_1174	s:[c.]:cH
frg_1175	OH-N3-OH
frg_1176	N_Pl3-C2-C2
frg_1177	O=N_Pl3-C2
frg_1178	N_Pl3-C2=C2H
frg_1179	s:c-c
frg_1180	C3H3-[C3^H]-[C3^H2]
frg_1181	C3H3-[C3^H]-[N3^]
frg_1182	[C3^H2]-[N3^]-[C3^H]
frg_1183	[N3^]-[C3^H2]-[C3^H]
frg_1184	C2-[N3^]-[C3^H2]
frg_1185	[N3^]-[C3^H]-[C3^H2]
frg_1186	P3-C3H2-c
frg_1187	S3H-C2H=C2H
frg_1188	S3-N3H-C3H3
frg_1189	N3H-S3-N3H
frg_1190	Cl-C3H-C3H2
frg_1191	P3-C3H2-C3H
frg_1192	N3-C2-C3
frg_1193	N1#C1-C3H2
frg_1194	nH:c:[c.]
frg_1195	nH:c-Br
frg_1196	nH:n:[c.]
frg_1197	N_Pl3-c:[c.]
frg_1198	F-C3H2-C3H
frg_1199	C3H-C1#C1H
frg_1200	N3H2-N3H-C3H2
frg_1201	[N3^]-[C3^H2]-[C3^H2]
frg_1202	[C3^H2]-[N3^]-[C3^H2]
frg_1203	cH:[c.]=C2
frg_1204	C3H3-N3-C2H
frg_1205	N3-C2H=N2
frg_1206	OH-B-c
frg_1207	N_Pl3-C3H2-C3H2
frg_1208	O=N_Pl3-C3H2
frg_1209	O=N2-c
frg_1210	N3H2-C3H2-C1
frg_1211	C1#C1-c
frg_1212	o:c:n
frg_1213	o:c-C3
frg_1214	nH:[n+]-C3H
frg_1215	nH:[n+]:c
frg_1216	n:nH:[n+]
frg_1217	C3H-c:[n+]
frg_1218	C3H2-C3H-[n+]
frg_1219	F-S3-c
frg_1220	O=S3-F
frg_1221	P3-C2H=C2H
frg_1222	OH-P3-C2H
frg_1223	O=P3-C2H
frg_1224	N2=N2-c
frg_1225	N2=N2-C2
frg_1226	N2-C2=[c.]
frg_1227	C3H3-Si-C3H3
frg_1228	C3H3-Si-c
frg_1229	Si-c:cH
frg_1230	cH:s:[c.]
frg_1231	C3H2-C2=[c.]
frg_1232	F-S3-C3H2
frg_1233	F-c:[c.]
frg_1234	F-C3-C3
frg_1235	OH-C3-OH
frg_1236	Cl-Hg-c
frg_1237	C1-c:[c.]
frg_1238	N3H2-N3H-C2
frg_1239	I-c:[c.]
frg_1240	N2H=S3-C3H2
frg_1241	N2H=S3-C3H3
frg_1242	N2H=S3=N2H
frg_1243	o:[n+]-[O-]
frg_1244	C1-c:[n+]
frg_1245	n:o:[n+]
frg_1246	o:[n+]:c
frg_1247	S3H-C3H2-N3H
frg_1248	S3H-C2-C2H
frg_1249	O-S3-N3H
frg_1250	C3H3-C3-[N_Pl3+]
frg_1251	C3-[N_Pl3+]=C2H
frg_1252	C3-[N_Pl3+]-[O-]
frg_1253	C3H2-C3-[N_Pl3+]
frg_1254	C2H=[N_Pl3+]-[O-]
frg_1255	C1-C3H2-C1
frg_1256	C2-S3-c
frg_1257	N2-C3H-C3H3
frg_1258	N3-C3-C3H3
frg_1259	C3-N3-c
frg_1260	N3H-c:[n+]
frg_1261	n:[n+]:c
frg_1262	C3H3-[n+]:c
frg_1263	s:c:[n+]
frg_1264	c:n:[n+]
frg_1265	n:[n+]-C3H3
frg_1266	s:c-Br
frg_1267	C2H=C2-Br
frg_1268	C2-C2-Br
frg_1269	C3H2-C3-Br
frg_1270	N_Pl3-C3-Br
frg_1271	O=N_Pl3-C3
frg_1272	N_Pl3-C3-C3H2
frg_1273	N3-C2-F
frg_1274	O-P3-N3H
frg_1275	P3-N3H-P3
frg_1276	OH-P3-N3H
frg_1277	O=P3-N3H
frg_1278	C2H=C2H-C1
frg_1279	C2H-C1#C1H
frg_1280	N3-C3-C3
frg_1281	O-C3-N3
frg_1282	C3-N3-C2H
frg_1283	N2-N3H-C2
frg_1284	N3H-N2=C2H
frg_1285	o:c-C2H
frg_1286	o:c-N_Pl3
frg_1287	O-S3-c
frg_1288	C3-C3H2-C2H
frg_1289	P3-C3-c
frg_1290	N2-N3-C3H
frg_1291	N3-N2=C2H
frg_1292	o:cH:cH
frg_1293	cH:o:[c.]
frg_1294	C3H-C3H-[N_Pl3+]
frg_1295	C3H-[N_Pl3+]-C2H
frg_1296	C3H-[N_Pl3+]=C2
frg_1297	O-C3H-[N_Pl3+]
frg_1298	N2-C2=[N_Pl3+]
frg_1299	C2-C2=[N_Pl3+]
frg_1300	N2=C2H-[N_Pl3+]
frg_1301	C2H-[N_Pl3+]=C2
frg_1302	N3H-C2-Cl
frg_1303	nH:[c.]:n
frg_1304	C2H-c:[c.]
frg_1305	C3H3-N3H-c
frg_1306	C2=C2-[N3^]
frg_1307	C3H2-S3-[C3^H]
frg_1308	C3H-C3-[C3^]
frg_1309	C3-[C3^]-[O^]
frg_1310	C3-[C3^]-[C3^H]
frg_1311	C3-[C3^]-C3
frg_1312	C3H3-C3-[C3^]
frg_1313	C3H2-C3-[C3^]
frg_1314	C3-C3H-c
frg_1315	O-C2-[C3^H]
frg_1316	C2-[C3^H]-[O^]
frg_1317	C2-[C3^H]-[C3^]
frg_1318	cH:o:cH
frg_1319	C2-C3-[C3^]
frg_1320	n:nH:[c.]
frg_1321	N3H2-C2-n
frg_1322	cH:n-C2
frg_1323	n:n-C2
frg_1324	N2H=C2-n
frg_1325	O-C2-C3
frg_1326	c-N3H-[N1+]
frg_1327	N3H-[N1+]#N1
frg_1328	n:c-Br
frg_1329	c-N3H-Br
frg_1330	S3H-C3H2-c
frg_1331	n-C3H2-C3H
frg_1332	C3H-[C3^H]-[C2^H]
frg_1333	[C3^H]-[C2^H]=[C2^H]
frg_1334	c-C3H-[C3^H]
frg_1335	[C2^H]-[C3^H]-[C2^H]
frg_1336	P3-C3H2-N3H
frg_1337	C3H3-Se-C3H2
frg_1338	Se-C3H2-C2
frg_1339	C3H3-Te-C3H2
frg_1340	Te-C3H2-C2
frg_1341	P3-C3H-c
frg_1342	P3-C3H-N3H
frg_1343	c:o:[c.]
frg_1344	Cl-c:[c.]
frg_1345	[C3^H2]-[N3^H]-[C3^H]
frg_1346	[N3^H]-[C3^H]-[C3^H2]
frg_1347	[N3^H]-[C3^H2]-[C3^H2]
frg_1348	C3H2-[C3^H]-[N3^H]
frg_1349	F-C3-C3H
frg_1350	OH-C3H2-C1
frg_1351	N3H2-C2-C3
frg_1352	N2H=C2-C3
frg_1353	N2=N2-C3
frg_1354	C2-n:[c.]
frg_1355	C2-n:c
frg_1356	O=C2-n
frg_1357	n-C2-c
frg_1358	S3-P3-O
frg_1359	P3-S3-C3H3
frg_1360	P3-N3H-C2
frg_1361	S3-P3=O
frg_1362	S3-P3-N3H
frg_1363	cH:c-As
frg_1364	OH-As-c
frg_1365	O=As-c
frg_1366	C3H3-C3H2-c
frg_1367	N3-N2=N2
frg_1368	O-C3H2-N3
frg_1369	O-C3H-[N3+]
frg_1370	N2-O-C3H
frg_1371	Cl-C2-C3H2
frg_1372	N2=C2-Cl
frg_1373	C3H3-[n+]:[c.]
frg_1374	cH:[c.]:[n+]
frg_1375	[n+]:[c.]:[c.]
frg_1376	[c.]:[n+]:[c.]
frg_1377	O-C3H2-n
frg_1378	S3H-P3-O
frg_1379	S3H-P3-OH
frg_1380	S3H-P3=O
frg_1381	C2=C2-Br
frg_1382	C3-C2H=C2
frg_1383	C3-C3H2-C1
frg_1384	C3H-C2-Br
frg_1385	F-C3H2-C2
frg_1386	C2H=C2-C1
frg_1387	N1#C1-C2
frg_1388	C1-C2-C1
frg_1389	C2-C2-C1
frg_1390	C2=C2-C1
frg_1391	S3H-C2-C2
frg_1392	S3H-C2=N2H
frg_1393	o:c-C3H3
frg_1394	N3-S3-N3
frg_1395	O-C2-O
frg_1396	O-N2=C2H
frg_1397	N2=C2H-C3
frg_1398	S3-C3-C2H
frg_1399	C3H3-S3-C3
frg_1400	Cl-C2-C3
frg_1401	Cl-C3-C2
frg_1402	Cl-C3-C3
frg_1403	P3-C3-OH
frg_1404	P3-C3-P3
frg_1405	C3-C3H2-C3
frg_1406	N3H-N3H-C2H
frg_1407	S3-c:nH
frg_1408	P3-C3H-C2H
frg_1409	P3-C3H-OH
frg_1410	F-Al-F
frg_1411	C3H3-C3H2-[N3+]
frg_1412	c-C3H2-[N3+]
frg_1413	C3-C3-C2H
frg_1414	n:[n+]:cH
frg_1415	cH:[n+]-c
frg_1416	cH:c-[n+]
frg_1417	cH:n:[n+]
frg_1418	n:[n+]-c
frg_1419	P3-S3-C3H2
frg_1420	S3-P3-OH
frg_1421	N3H2-N2=C2
frg_1422	N3H2-C3-C3H
frg_1423	N3-N3-c
frg_1424	o:c:c
frg_1425	S3-C3H2-C3H3
frg_1426	OH-C2-N3H
frg_1427	OH-C2=N2
frg_1428	N3H-[C3^H]-[C2^]
frg_1429	C2-O-[C3^H]
frg_1430	O-[C3^H]-[N3^]
frg_1431	[C3^H]-[C3^H2]-[C2^]
frg_1432	O=[C2^]-[C3^H2]
frg_1433	[N3^]-[C2^]-[C3^H2]
frg_1434	O=S3-[C3^H]
frg_1435	S3-[C3^H]-[C3^H2]
frg_1436	O=S3-C3
frg_1437	S3-N3-C2
frg_1438	O-C3H-C1
frg_1439	C1-C3H-c
frg_1440	C3H3-C3-C1
frg_1441	S3-n:cH
frg_1442	OH-S3-n
frg_1443	O=S3-n
frg_1444	S3-n:[c.]
frg_1445	S3-S3-C2
frg_1446	S3-C2=C2H
frg_1447	S3-C2=S2
frg_1448	P3-c:cH
frg_1449	OH-P3-c
frg_1450	O=P3-c
frg_1451	P3-c:c
frg_1452	N3H2-S3-C2
frg_1453	S3-C2-N3
frg_1454	S3-C3H2-C1
frg_1455	O-n:cH
frg_1456	n-O-C3H3
frg_1457	O-n:[c.]
frg_1458	OH-c:nH
frg_1459	[c.]=[c.]:[c.]
frg_1460	cH:[c.]=[c.]
frg_1461	N2-c:[c.]
frg_1462	c-N2=[c.]
frg_1463	c:[c.]=[c.]
frg_1464	O-C3H2-C1
frg_1465	O-O-C3
frg_1466	N3H2-O-C2
frg_1467	OH-C2-N3
frg_1468	C3H-[C3^]-C3
frg_1469	C3H2-C3H-[C3^]
frg_1470	O-C3H-[C3^]
frg_1471	[O^]-[C3^]-[C3^]
frg_1472	C3H3-[C3^]-[C3^]
frg_1473	C3H-[C3^]-[C3^]
frg_1474	[C3^]-[O^]-[C3^]
frg_1475	C3H-[C3^]-[O^]
frg_1476	C3-C3H-[C3^]
frg_1477	C3H3-[C3^]-C3H
frg_1478	O-C2H=C2H
frg_1479	N_Pl3-c:n
frg_1480	S3-P3=S2
frg_1481	S3-C3H2-N3
frg_1482	C3H3-[C3^H]-[C3^H]
frg_1483	N2-O-C3
frg_1484	s:cH:c
frg_1485	OH-S3-[N3^]
frg_1486	OH-S3-C2
frg_1487	O=S3-C2
frg_1488	o:c-N3H2
frg_1489	N_Pl3-O-C3H2
frg_1490	O=N_Pl3-O
frg_1491	[C3^H2]-[O^]-[C3^H]
frg_1492	[O^]-[C3^H2]-[C3^H]
frg_1493	o:c-C2
frg_1494	Cl-C2-C2
frg_1495	C2H-S3-c
frg_1496	S3-C2H=C2H
frg_1497	O=S3-C2H
frg_1498	N1#C1-C2H
frg_1499	N_Pl3-C2-C3H
frg_1500	N_Pl3-C2=C2
frg_1501	N3-S3-C3H2
frg_1502	n-C2-C3H2
frg_1503	o:[c.]:c
frg_1504	C2-S3-C2
frg_1505	N3H-S3-N3
frg_1506	N3H2-C3H-N3H2
frg_1507	N2-S3-c
frg_1508	S3-N2=C2
frg_1509	O=S3-N2
frg_1510	S2=C1=N2
frg_1511	C3H2-N2=C1
frg_1512	C3H3-C1#C1
frg_1513	c-c:[n+]
frg_1514	C3H2-C3H2-[n+]
frg_1515	N2-N3H-c
frg_1516	N3H-N2=N2
frg_1517	s:c-B
frg_1518	O=[C2^]-[O^]
frg_1519	[C3^H2]-[O^]-[C2^]
frg_1520	[C3^H2]-[C3^H2]-[C2^]
frg_1521	[O^]-[C3^H2]-[C3^H2]
frg_1522	[O^]-[C2^]-[C3^H2]
frg_1523	C3H3-N2=C2
frg_1524	ClH=C2-C2H
frg_1525	n-C3H-c
frg_1526	C2H-O-C2
frg_1527	S3H-C2-C3H2
frg_1528	C3-C2-c
frg_1529	S3-C3-c
frg_1530	C3H2-S3-C3
frg_1531	S3-C3-N3
frg_1532	O=N2-C3H
frg_1533	n-C3H-C3H3
frg_1534	Br-C3H-Br
frg_1535	O-N3-C3
frg_1536	N3-C3-N2
frg_1537	N3-O-C3H2
frg_1538	C2H2=C2-C2H
frg_1539	C3-C3H2-[C3^H]
frg_1540	C3H-C3H-Br
frg_1541	C2-C3H-Br
frg_1542	OH-C3-n
frg_1543	n-C3-C3H2
frg_1544	n-C3-C2
frg_1545	C3-n:c
frg_1546	s:n:n
frg_1547	n:s:c
frg_1548	S3H-C3-C3H3
frg_1549	S3H-C3-C2
frg_1550	N3H-N2=C2
frg_1551	O-S3-C3H3
frg_1552	C3H-[N3+]-C3H
frg_1553	P3H-O-C3H2
frg_1554	O-P3H-C3H2
frg_1555	P3H-C3H2-C3H2
frg_1556	c:[n+]:[c.]
frg_1557	C3H2-[n+]:[c.]
frg_1558	OH-O-C3
frg_1559	C3H3-As-C3H3
frg_1560	OH-As-C3H3
frg_1561	O=As-C3H3
frg_1562	N3H-N3H-c
frg_1563	C2H-C3H-[C3^H]
frg_1564	OH-C3H-[C3^H]
frg_1565	C3H-C3H2-[n+]
frg_1566	o:c-C3H
frg_1567	C2=C2H-C1
frg_1568	O-C3-c
frg_1569	N2-S3-C3H2
frg_1570	S3-N2=O
frg_1571	O-C2-N2
frg_1572	N2=N2-C2H
frg_1573	C2-C2H=[N_Pl3+]
frg_1574	C2H=[N_Pl3+]-c
frg_1575	c-[N_Pl3+]-[O-]
frg_1576	cH:c-[C3^H]
frg_1577	c-[C3^H]-[O^]
frg_1578	S3-C3H-N3
frg_1579	OH-S3-C3H
frg_1580	N3H2-N3H-C3
frg_1581	C2-[C3^]-C2
frg_1582	C3-C3-[N_Pl3+]
frg_1583	N3-C2=[N_Pl3+]
frg_1584	C2=[N_Pl3+]-[O-]
frg_1585	C3-[N_Pl3+]=C2
frg_1586	c-C2=[N_Pl3+]
frg_1587	N3-C3-C2
frg_1588	C3H2-[C3^H]-[N3^]
frg_1589	N2=C2-C1
frg_1590	nH:c-Cl
frg_1591	C2-C3H2-[n+]
frg_1592	O=C2H-O
frg_1593	s:c-C3H3
frg_1594	n-C3H2-C2
frg_1595	C2-N3H-[C3^]
frg_1596	O-[C3^]-N3H
frg_1597	N3H-[C3^]-[C3^H]
frg_1598	N3H-[C3^]-[C2^]
frg_1599	[N3^]-[C2^]-[C3^]
frg_1600	O=[C2^]-[C3^]
frg_1601	S3-[C3^H]-[C3^]
frg_1602	[N3^]-[C3^H]-[C3^]
frg_1603	C3H3-O-[C3^]
frg_1604	O-[C3^]-[C3^H]
frg_1605	O-[C3^]-[C2^]
frg_1606	[C3^H]-[C3^]-[C2^]
frg_1607	N2-O-C3H3
frg_1608	s:c-C2H
frg_1609	O-C2-[N3^]
frg_1610	O-[C3^]-[C3^H2]
frg_1611	[N3^]-[C3^H2]-[C3^]
frg_1612	[C3^H2]-[C3^]-[C3^H]
frg_1613	N3H-[C3^]-[C3^H2]
frg_1614	N3H-C2-[C3^H]
frg_1615	C2-[C3^H]-[S3^]
frg_1616	[C3^H]-[S3^]-[C2^]
frg_1617	[S3^]-[C2^]-[S3^]
frg_1618	C2=[C2^]-[S3^]
frg_1619	[S3^]-[C3^H]-[S3^]
frg_1620	C2-C2=[C2^]
frg_1621	n:[c.]:[n.+]
frg_1622	cH:cH:[n.+]
frg_1623	n:[n.+]:cH
frg_1624	cH:[n.+]:[c.]
frg_1625	cH:[c.]:[n.+]
frg_1626	cH:n:[n.+]
frg_1627	n:[n.+]:[c.]
frg_1628	s:n:c
frg_1629	C3H2-C2-[n+]
frg_1630	cH:[n+]-C2
frg_1631	C2-[n+]:c
frg_1632	C2=C2-[n+]
frg_1633	C3H2-c:[n+]
frg_1634	N3H-N3-C3H3
frg_1635	C3-C2-C3
frg_1636	N3H-C3H2-B
frg_1637	S3-C2-O
frg_1638	S3-C3H-O
frg_1639	N2=C2-n
frg_1640	S3-C3-C2
frg_1641	S3-S3-C3
frg_1642	S3-C3-C3H2
frg_1643	n-C3-c
frg_1644	N3H-C3H-N3
frg_1645	cH:[n+]:[c.]
frg_1646	C3H2-C2-[C3^H]
frg_1647	OH-C3H-OH
frg_1648	Cl-C3H-C3
frg_1649	Hg-C3H2-C3H
frg_1650	N3H-C2=[OH+]
frg_1651	N3H2-C2=[OH+]
frg_1652	Cl-Hg-C3H2
frg_1653	S3-N2=C2H
frg_1654	OH-C3-N3H
frg_1655	N2=C2-[C3^H]
frg_1656	c-[C3^]-[C3^H]
frg_1657	c-[C3^]-[C3^H2]
frg_1658	[C3^H2]-[C3^H]-[C3^]
frg_1659	cH:c-[C3^]
frg_1660	c-[C3^]-c
frg_1661	S3-C2-N3H
frg_1662	n:n-C3H
frg_1663	C2-N3H-C1
frg_1664	N3H-C1#N1
frg_1665	c-[C3^H]-[C3^]
frg_1666	Cl-[C3^]-[C3^H]
frg_1667	Cl-[C3^]-[C3^H2]
frg_1668	Cl-[C3^]-Cl
frg_1669	C2H-N3-[C3^H]
frg_1670	N3-[C3^H]-[C3^H2]
frg_1671	c-N3-[C3^H]
frg_1672	Cl-[Pt[2+]]-Cl
frg_1673	Cl-Pt-Cl
frg_1674	N3H-C2-C1
frg_1675	C3H-C3H-[C3^]
frg_1676	N3H-[C3^]-C3H
frg_1677	C3H-[C3^]-[C3^H]
frg_1678	C3H-[C3^]-[C2^]
frg_1679	OH-C3H-[C3^]
frg_1680	[O^]-[C2^]-[C3^]
frg_1681	C3H-[C3^H]-[C3^]
frg_1682	[C3^H]-[O^]-[C2^]
frg_1683	Cl-C3H-C3H3
frg_1684	C3H3-S3-C3H
frg_1685	N3H-N3-C3H
frg_1686	s:c-N3
frg_1687	N3H-C2=[c.]
frg_1688	OH-c:n
frg_1689	OH-C3-N2
frg_1690	S3-C3H2-N3H
frg_1691	O-N3-C2H
frg_1692	N3-O-C3H3
frg_1693	O-N3-c
frg_1694	F-C3H-C3H3
frg_1695	N3-C3H2-n
frg_1696	C3H-C2-[N3^]
frg_1697	O=C2-[N3^]
frg_1698	N3H2-C3-[C3^H]
frg_1699	C3-[C3^H]-[C3^H2]
frg_1700	C2-C3-[C3^H]
frg_1701	c-C3-[C3^H]
frg_1702	C2H2=C2-c
frg_1703	n-C2=C2H2
frg_1704	P3-N3-C3H2
frg_1705	O=P3-N3
frg_1706	N3H-P3-N3
frg_1707	O-P3-N3
frg_1708	P3-N3H-C3H2
frg_1709	C2H-C2-[C3^H]
frg_1710	C3-[C3^H]-[C3^H]
frg_1711	C3H3-C3-[C3^H]
frg_1712	C3H-C3-[C3^H]
frg_1713	C3-C3H-[C3^H]
frg_1714	C3H3-C3H-[C3^]
frg_1715	S3H-C2=S2
frg_1716	S2=C2-O
frg_1717	o:n:cH
frg_1718	C2H-c:[n+]
frg_1719	N3H2-C3H-C3
frg_1720	C2H-C3H-c
frg_1721	Br-C2-Br
frg_1722	C3H2-C3H-C1
frg_1723	C2H-C1#C1
frg_1724	C2H-C3-C1
frg_1725	F-C3H-C3
frg_1726	F-C3H-F
frg_1727	C2H-S3-C2
frg_1728	C2=C2-[C3^H]
frg_1729	C2-C2-[C3^H]
frg_1730	[c.]:s:[c.]
frg_1731	Br-C3H2-Br
frg_1732	N3H-C2=C2H2
frg_1733	Cl-C2-Cl
frg_1734	C1-S3-c
frg_1735	S3-C1#N1
frg_1736	C1=N2-c
frg_1737	O-P3-C3H2
frg_1738	P3H-O-C3H
frg_1739	O-P3H-O
frg_1740	cH:c-[I+]
frg_1741	c:c-[I+]
frg_1742	c-[I+]-c
frg_1743	P3-C3H2-P3
frg_1744	S3-c:[n+]
frg_1745	S3-S3-c
frg_1746	S3-C3H-N2
frg_1747	S3-C2-C3
frg_1748	C2-O-[C3^]
frg_1749	O-[C3^]-C3H
frg_1750	C3H-[C3^]-[C3^H2]
frg_1751	o:c:[n+]
frg_1752	C3-N3H-c
frg_1753	N3H2-C3H-n
frg_1754	C2H=C2H-Br
frg_1755	[O^]-[C2^]-[C3^H]
frg_1756	C3H3-[C3^H]-[C2^]
frg_1757	Se-N3-C2
frg_1758	N3-Se-c
frg_1759	Se-c:cH
frg_1760	Se-c:c
frg_1761	Se-N3-c
frg_1762	C3-C1#C1
frg_1763	O-C3-C1
frg_1764	C1#C1-[C3^H]
frg_1765	C1-[C3^H]-[C3^H2]
frg_1766	P3-C2=C2
frg_1767	O=P3-C2
frg_1768	O-P3-C2
frg_1769	P3-C2-C3H
frg_1770	OH-C2=[c.]
frg_1771	O-C2=[c.]
frg_1772	C3H3-c:[c.]
frg_1773	S3-c:o
frg_1774	O-C3H-F
frg_1775	O-C3-F
frg_1776	F-C3H-Cl
frg_1777	n:c-n
frg_1778	C3H2-[C3^H]-[S3^]
frg_1779	[S3^]-[C3^H]-[C3^H]
frg_1780	[C3^H]-[S3^]-[C3^H]
frg_1781	N2-N2=C2
frg_1782	Cl-C2H=C2H
frg_1783	S3-C3H2-S3
frg_1784	S3H-C2-c
frg_1785	S3-P3-S3
frg_1786	P3-C3-C3H3
frg_1787	s:c-n
frg_1788	O-[C3^]-C3H2
frg_1789	O-[C3^]-[C3^]
frg_1790	[C3^H]-[C3^]-[C3^]
frg_1791	[C3^]-[C3^H]-[C3^]
frg_1792	C3H-C3H2-[C3^]
frg_1793	C3H2-[C3^]-[C3^]
frg_1794	F-C3H2-C3H2
frg_1795	N3H-C3-N3H
frg_1796	N3H2-S3-N2
frg_1797	C2-S3-[C3^H]
frg_1798	C3-S3-c
frg_1799	n:c-C1
frg_1800	S3-C3-F
frg_1801	C3-c:[c.]
frg_1802	O-[C3^H]-[C3^]
frg_1803	S3-C3H2-F
frg_1804	C3H2-O-[C3^H]
frg_1805	n-C3H2-C3
frg_1806	F-C2=C2
frg_1807	F-C2-C2H
frg_1808	n:c-F
frg_1809	P3-C2-OH
frg_1810	OH-P3-C2
frg_1811	P3-C2=O
frg_1812	C3H3-[C3^H]-[O^]
frg_1813	P3-[C3^H]-[C3^H]
frg_1814	P3-[C3^H]-[O^]
frg_1815	OH-P3-[C3^H]
frg_1816	O=P3-[C3^H]
frg_1817	C3H2-P3-C3H2
frg_1818	C3H2-[C3^]-C3H
frg_1819	[C3^]-C3H-[C3^]
frg_1820	o:[c.]:n
frg_1821	C2H-C3-c
frg_1822	N3H2-C3H-C1
frg_1823	C3H3-N3H-C3
frg_1824	C2H-C2=[N_Pl3+]
frg_1825	C3H3-[N_Pl3+]=C2
frg_1826	C3H3-[N_Pl3+]-C3H3
frg_1827	s:c-C3
frg_1828	N2-S3-C3
frg_1829	N2-N2=C2H
frg_1830	I-C2-C2H
frg_1831	N2-N3H-C3H
frg_1832	S3-N3-Cl
frg_1833	Cl-N3-Cl
frg_1834	s:c-C3H
frg_1835	Cl-C2=C2H2
frg_1836	I-C1#C1
frg_1837	Cl-C3H-Br
frg_1838	N3-C3-C2H
frg_1839	nH:[c.]=C2H
frg_1840	C2-C2H=[c.]
frg_1841	C2H=[c.]:c
frg_1842	c-C2H=[c.]
frg_1843	C3-C3H2-[N3+]
frg_1844	C3-N3-[C3^H]
frg_1845	N3H-C3-N3
frg_1846	C2-N3-[C3^H]
frg_1847	N3-[C3^H]-[C3^H]
frg_1848	N3-[C3^H]-[C2^]
frg_1849	OH-Si-C3H2
frg_1850	OH-Si-C3H
frg_1851	OH-Si-c
frg_1852	Si-C3H-C3H2
frg_1853	Si-C3H2-C3H2
frg_1854	C3H2-Si-C3H
frg_1855	C3H2-Si-c
frg_1856	C3H-Si-c
frg_1857	O-P3-C3H
frg_1858	[N3+]-C3H-[C3^H]
frg_1859	N3H2-N3H-c
frg_1860	N3H-C3H2-N3H
frg_1861	N2-C2-Br
frg_1862	C3H3-[C3^H]-[C3^]
frg_1863	n:n-C2H
frg_1864	C2-C3H2-[C3^H]
frg_1865	P3-C3H-P3
frg_1866	C3-C2=[N_Pl3+]
frg_1867	[N_Pl3+]-c:[c.]
frg_1868	C3H2-[N_Pl3+]-c
frg_1869	C2=[N_Pl3+]-c
frg_1870	C3H2-C3H2-[N_Pl3+]
frg_1871	C3H2-[N_Pl3+]=C2
frg_1872	I-C3H2-C2
frg_1873	C3H3-C3H-[N3+]
frg_1874	C2H-O-c
frg_1875	N3H-N3H-C3H
frg_1876	O-C3H-Cl
frg_1877	C3H3-C3-Br
frg_1878	C3H-C3-Br
frg_1879	N_Pl3-O-C3H
frg_1880	o:n:[c.]
frg_1881	n:o:n
frg_1882	OH-N2=C2
frg_1883	n:c:[n+]
frg_1884	C3H2-O-C2H
frg_1885	O=S3=N2H
frg_1886	N_Pl3-N3H-C2
frg_1887	O=N_Pl3-N3H
frg_1888	S3H-C2-N3H2
frg_1889	S3-C2-S3
frg_1890	n-C2=C2
frg_1891	n-C2-C1
frg_1892	c:c-[C3^]
frg_1893	n:c-[C3^]
frg_1894	c-C2-Br
frg_1895	OH-C3H-N2
frg_1896	P3-S3-C3H
frg_1897	C2H-C3-[C3^H]
frg_1898	C3-[C3^H]-[O^]
frg_1899	OH-C3-[C3^H]
frg_1900	C1-C3H2-[N3+]
frg_1901	C2H2=C1=C2H
frg_1902	C3H2-C2H=C1
frg_1903	Hg-c:c
frg_1904	C3H-S3-C3H
frg_1905	C3H-N2=C2H2
frg_1906	N2H=C2-N2
frg_1907	O-P3-N3H2
frg_1908	O=P3-N3H2
frg_1909	S3-P3-N3H2
frg_1910	C3H3-S3-C2
frg_1911	N3H2-O-C3H3
frg_1912	F-P3-C3H2
frg_1913	O=P3-F
frg_1914	O-P3-F
frg_1915	OH-P3-C3H3
frg_1916	S3-O-C3H3
frg_1917	OH-C3H2-[C3^]
frg_1918	O-[n+]:c
frg_1919	S3-O-[n+]
frg_1920	C3H3-C3H-C1
frg_1921	C3H-C3H2-Br
frg_1922	N3-C3-[C3^H]
frg_1923	[N3^H]-[C3^H]-[C3^H]
frg_1924	[C3^H]-[N3^H]-[C3^H]
frg_1925	C3-[C3^H]-[N3^H]
frg_1926	O-C3-[C3^H]
frg_1927	S3H-c:s
frg_1928	c-C2=[c.]
frg_1929	nH:[c.]=C2
frg_1930	o:c-N2
frg_1931	N3-[n+]:cH
frg_1932	C3H2-N3-[n+]
frg_1933	o:n:[n+]
frg_1934	N3-[n+]:n
frg_1935	o:c-N3H
frg_1936	S3-C3H2-[C3^]
frg_1937	C3H2-[C3^]-C3H2
frg_1938	C2-C3H2-[C3^]
frg_1939	S3-C3H-F
frg_1940	n-C2-C3H
frg_1941	C2=C2H-[N_Pl3+]
frg_1942	C3H2-N2=[N_Pl3+]
frg_1943	N2=[N_Pl3+]-C2H
frg_1944	N3-[N_Pl3+]=N2
frg_1945	C3H2-N3-[N_Pl3+]
frg_1946	N3-[N_Pl3+]-C2H
frg_1947	N3H2-S3-C3H
frg_1948	n-N3H-C3H2
frg_1949	N3H-n:n
frg_1950	N3H-n:[c.]
frg_1951	C3H2-N3H-[C3^]
frg_1952	N3H-[C3^]-C2
frg_1953	P3-N3-C3H
frg_1954	N3-P3-C3H3
frg_1955	N3-P3-c
frg_1956	C3H3-P3-c
frg_1957	N3H2-[N3+]-C3H3
frg_1958	N3H2-[N3+]-C3H2
frg_1959	C2-N3H-Br
frg_1960	C2-N3-Br
frg_1961	C3H2-N3-Br
frg_1962	N_Pl3-C3-C3H3
frg_1963	C3-N_Pl3=C2H
frg_1964	N_Pl3=C2H-c
frg_1965	O=N_Pl3=C2H
frg_1966	C2-[C3^H]-[C2^]
frg_1967	O-C3H-Br
frg_1968	Cl-C3-Br
frg_1969	N3H-S3-C3H2
frg_1970	nH:c-[S3+]
frg_1971	n:c-[S3+]
frg_1972	OH-[S3+]-c
frg_1973	C3H2-[S3+]-c
frg_1974	c-C3H2-[S3+]
frg_1975	OH-[S3+]-C3H2
frg_1976	C3H3-S3-C2H
frg_1977	n-C2=C2H
frg_1978	c:c-[n+]
frg_1979	n:n:[n+]
frg_1980	c-n:[n+]
frg_1981	n:[n+]:n
frg_1982	N_Pl3-C2H=C2
frg_1983	O=N_Pl3-C2H
frg_1984	N_Pl3-C3H-C3H2
frg_1985	N_Pl3-C3H-C2
frg_1986	N2=[c.]:c
frg_1987	C2=C2H-Br
frg_1988	s:[c.]=N2
frg_1989	C3H-C2-[C3^]
frg_1990	C3H3-[C3^]-C2
frg_1991	C3H3-[C3^]-[C3^H2]
frg_1992	n-C2H=C2
frg_1993	N3H-N3-c
frg_1994	N2H=C2-C3H3
frg_1995	C3H3-C3H2-[N_Pl3+]
frg_1996	C3H2-[N_Pl3+]-C3H2
frg_1997	S3H-C3H-C2
frg_1998	S3H-C2=C2H
[truncated: 13,265 more rows]

## Sheet: 4_Atom_Fragment_Dictionary
Dictionary for fragments with 4 heavy atoms
Key	Fragment String
frg_1	C3H3-C2-O-C3H
frg_2	C3H2-C3H-O-C2
frg_3	O=C2-O-C3H
frg_4	O-C3H-C3H2-[N3+]
frg_5	O-C3H-C3H2-C2
frg_6	C3H3-[N3+]-C3H2-C3H
frg_7	OH-C2-C3H2-C3H
frg_8	O=C2-C3H2-C3H
frg_9	C3H2-C3H-C3H2-[N3+]
frg_10	C3H2-C3H-C3H2-C2
frg_11	OH-C3H-C3H-C2
frg_12	OH-C3H-C3H-OH
frg_13	OH-C3H-C2H=C2H
frg_14	C3H-C3H-C2=C2H
frg_15	C3H-C3H-C2-C2
frg_16	C3H-C2H=C2H-C2H
frg_17	C2H=C2H-C2H=C2
frg_18	C2H-C3H-C3H-C2
frg_19	OH-C3H-C3H-C2H
frg_20	C3H-C2=C2H-C2H
frg_21	C2H-C2H=C2-C2
frg_22	C3H-C3H-C2H=C2H
frg_23	OH-C2-C2=C2H
frg_24	O=C2-C2=C2H
frg_25	OH-C3H-C2=C2H
frg_26	OH-C2-C2-C3H
frg_27	O=C2-C2-C3H
frg_28	OH-C3H-C2-C2
frg_29	N3H2-C3H2-C3H-C3H3
frg_30	OH-C3H-C3H2-N3H2
frg_31	O=C2-C3H2-N3H2
frg_32	N3H2-C3H2-C2-C3H2
frg_33	O-C3H2-C2-C3H2
frg_34	P3-O-C3H2-C2
frg_35	O=C2-C3H2-O
frg_36	OH-P3-O-C3H2
frg_37	O=P3-O-C3H2
frg_38	Cl-c:c:cH
frg_39	N_Pl3-c:c-Cl
frg_40	Cl-c:cH:cH
frg_41	O=N_Pl3-c:c
frg_42	c:cH:c:c
frg_43	c:cH:cH:c
frg_44	cH:cH:c:cH
frg_45	N_Pl3-c:cH:cH
frg_46	cH:c:c:cH
frg_47	N_Pl3-c:c:cH
frg_48	O=N_Pl3-c:cH
frg_49	cH:c:cH:c
frg_50	cH:cH:c:c
frg_51	N_Pl3-c:cH:c
frg_52	cH:n-C3H2-C3H3
frg_53	C3H3-C3H2-n:[c.]
frg_54	n:[c.]:n-C3H2
frg_55	C3H2-n:[c.]:[c.]
frg_56	n:cH:n-C3H2
frg_57	n:[c.]:[c.]:n
frg_58	n:[c.]:[c.]:c
frg_59	n:[c.]:n:cH
frg_60	n:cH:n:[c.]
frg_61	cH:n:[c.]:c
frg_62	cH:n:[c.]:[c.]
frg_63	N3H2-c:[c.]:n
frg_64	n:c:[c.]:n
frg_65	cH:n:c:[c.]
frg_66	n:cH:n:c
frg_67	N3H2-c:n:cH
frg_68	N3H2-c:[c.]:[c.]
frg_69	n:c:[c.]:[c.]
frg_70	C3H3-C3H2-C3-C3H3
frg_71	OH-C3-C3H2-C3H3
frg_72	C3H3-C3H2-C3-C3H
frg_73	OH-C3H-C3-C3H2
frg_74	C3H2-C3-C3H-C2
frg_75	OH-C2-C3H-C3
frg_76	O=C2-C3H-C3
frg_77	OH-C3H-C3-C3H3
frg_78	C3H3-C3-C3H-C2
frg_79	OH-C3H-C3-OH
frg_80	OH-C3-C3H-C2
frg_81	OH-C3H-C2-OH
frg_82	OH-C3H-C2=O
frg_83	OH-C3H-C3H-C3H
frg_84	C3H-C3H-C3H-C3H
frg_85	O-C3H-C3H-C3H
frg_86	P3-O-C3H-C3H
frg_87	OH-C3H-C3H-O
frg_88	OH-P3-O-C3H
frg_89	O=P3-O-C3H
frg_90	N3H2-C2=N2-C2
frg_91	N3H2-C2-N3H-C2
frg_92	C2=N2-C2-C2
frg_93	O=C2-N2=C2
frg_94	N3H-C2-N3H-C2
frg_95	C2=C2-N3H-C2
frg_96	N3H-C2=C2-N3H
frg_97	N3H-C2=C2-C2
frg_98	N3H-C2-N3H-C3H2
frg_99	N3H-C2=N2-C2
frg_100	O=C2-C2=C2
frg_101	N2-C2-C2=C2
frg_102	C3H-N3H-C2=C2
frg_103	C3H-C3H2-N3H-C2
frg_104	N2=C2-N3H-C2
frg_105	N3H-C3H2-C3H-C3H2
frg_106	N3H-C3H2-C3H-N3H
frg_107	C3H2-C3H-N3H-C2
frg_108	N3-C3H2-C3H-C3H2
frg_109	C3H2-N3H-C2=C2
frg_110	C3H-N3H-C2-C2
frg_111	C3H-C3H2-N3-C2H
frg_112	C3H-C3H2-N3-c
frg_113	cH:c-N3-C3H2
frg_114	O=C2H-N3-C3H2
frg_115	N3-c:cH:cH
frg_116	N3H-C3H-C3H2-N3
frg_117	cH:c-N3-C2H
frg_118	O=C2H-N3-c
frg_119	cH:cH:c-C2
frg_120	O=C2-c:cH
frg_121	N3H-C2-c:cH
frg_122	C3H-N3H-C2-c
frg_123	C2-N3H-C3H-C2
frg_124	O=C2-N3H-C3H
frg_125	OH-C2-C3H-N3H
frg_126	O=C2-C3H-N3H
frg_127	N3H-C3H-C3H2-C3H2
frg_128	C3H-C3H2-C3H2-C2
frg_129	OH-C2-C3H2-C3H2
frg_130	O=C2-C3H2-C3H2
frg_131	OH-C2-C3H-C3H2
frg_132	O=C2-C3H-C3H2
frg_133	C3H2-C3H2-C3H-C2
frg_134	O=C2-C2-N3H
frg_135	N3H-C2-C2-N2
frg_136	Cl-C3H2-C3H2-Cl
frg_137	OH-c:cH:c
frg_138	OH-c:c:cH
frg_139	cH:c:c:c
frg_140	OH-c:c:c
frg_141	OH-c:c-OH
frg_142	Cl-c:cH:c
frg_143	Cl-c:c-Cl
frg_144	C3H3-C3H2-C3H2-C3H2
frg_145	C3H2-C3H2-C3H2-C3H2
frg_146	C3H2-C3H2-C3H2-C2
frg_147	C3H2-C3H2-C2-C2H
frg_148	C3H2-C2-C2H=C2H
frg_149	C3H-C2H=C2H-C2
frg_150	O=C2-C2H=C2H
frg_151	C3H2-C3H-C3H-C2H
frg_152	C3H2-C3H2-C3H-C3H
frg_153	C3H2-C2-C3H-C3H
frg_154	O=C2-C3H-C3H
frg_155	C3H-C3H-C3H2-C2
frg_156	C3H-C3H2-C2-C3H
frg_157	C3H-C3H-C3H-C2
frg_158	C3H2-C3H-C3H-C3H
frg_159	OH-C3H-C3H2-C2
frg_160	C3H2-C3H-C2-C3H2
frg_161	C3H2-C3H2-C3H2-C3H
frg_162	C3H3-C3-C3H-C3H2
frg_163	C3H3-C3-C3H-C3H
frg_164	C3H3-C3-C3H2-C3H2
frg_165	C3H2-C3H2-C3H-C3
frg_166	C3H-C3H-C3H-C3
frg_167	C3H2-C3H-C3H-C3
frg_168	C3H-C3H2-C3H2-C3
frg_169	C3H2-C3H-C3-C3H2
frg_170	C3H2-C3-C3H-C3H
frg_171	C3H2-C3H-C3-C3H
frg_172	C3H2-C3H-C3H-C3H2
frg_173	C3H2-C3H2-C3-C3H
frg_174	C3H-C3H-C3-C3H
frg_175	C3H-C3H2-C3H2-C3H
frg_176	C3H2-C3H2-C3H-C3H2
frg_177	C3H2-C2-C3H2-C3H
frg_178	C3H2-C3H2-C2-C3H2
frg_179	C3-C3H2-C3H2-C2
frg_180	C3-C3H-C3H2-C2
frg_181	OH-C3H-C3-C3H
frg_182	OH-C3H-C3H2-C3H2
frg_183	O=C2-N3H-C3H2
frg_184	C3H2-C3H2-N3H-C2
frg_185	C3H2-N3H-C2-C3H2
frg_186	N3H-C2-C3H2-C3H2
frg_187	N3H-C3H2-C3H2-C3H2
frg_188	OH-C2-C3H-N2
frg_189	C2=N2-C3H-C2
frg_190	C2H-C3H2-C3H-C2
frg_191	O=C2-C3H-N2
frg_192	C3H-N2=C2-C2H
frg_193	C3H-N2=C2-C2
frg_194	C3H-C3H2-C2H=C2H
frg_195	C3H2-C2H=C2H-C2
frg_196	C3H2-C3H-N2=C2
frg_197	N2=C2-C2H=C2H
frg_198	C2H=C2H-C2-C2
frg_199	N2-C3H-C3H2-C2H
frg_200	OH-C2-C2-C2H
frg_201	O=C2-C2-C2H
frg_202	OH-C2-C2=N2
frg_203	O=C2-C2=N2
frg_204	OH-C3H2-C3H-OH
frg_205	OH-C3H2-C3H-C3H
frg_206	OH-C3H-C3H-C3H2
frg_207	C3H2-C3H-C3H-C2
frg_208	C3H-C2-C2-C2
frg_209	OH-C2-C2-C2
frg_210	O=C2-C2-C2
frg_211	O=C2-C2=O
frg_212	OH-C2-C2=O
frg_213	OH-C2-c:cH
frg_214	OH-C2-c:c
frg_215	C2-c:c:c
frg_216	OH-c:c-C2
frg_217	O=C2-c:c
frg_218	cH:cH:cH:c
frg_219	OH-c:cH:cH
frg_220	C2-C3H2-C3H2-c
frg_221	cH:c-C3H2-C3H2
frg_222	C3H2-C3H2-c:c
frg_223	C3H2-c:c:c
frg_224	OH-c:c-C3H2
frg_225	cH:cH:c-C3H2
frg_226	C3H3-C3H2-C3-C2
frg_227	OH-C2-C3-C3H2
frg_228	O=C2-C3-C3H2
frg_229	C3H3-C2-C3-C3H2
frg_230	OH-C3-C2-OH
frg_231	OH-C3-C2=O
frg_232	OH-C3-C2-C3H3
frg_233	OH-C2-C3-C2
frg_234	O=C2-C3-C2
frg_235	C3H3-C2-C3-C2
frg_236	C3H3-C3-C2-C3H3
frg_237	O=C2-C3-C3H3
frg_238	OH-C2-C3-C3H3
frg_239	N3H2-C2=C2-C2H
frg_240	N3H2-C2=C2-C2
frg_241	OH-C2-C2-N3H2
frg_242	O=C2-C2-N3H2
frg_243	OH-C2-C2=C2
frg_244	C2H=C2H-C2=C2
frg_245	C2H-C2=C2-C2
frg_246	C2-C2=C2-C2
frg_247	C2H-C2H=C2H-C2
frg_248	O=C2H-C2H=C2H
frg_249	N3H2-C2=N2-C3H
frg_250	C3H-C3H-N2=C2
frg_251	N3-C3H-N2=C2
frg_252	O=C2-N3H-C2
frg_253	C3H-C2-N3H-C2
frg_254	N3H-C2-C3H-C3H
frg_255	N3H-C2-C3H-N3
frg_256	N3H-C2=N2-C3H
frg_257	C3-N3-C3H-C2
frg_258	OH-N3-C3H-C2
frg_259	N2-C3H-C3H-C2
frg_260	N3-C3H-C3H-C2
frg_261	O=C2-C3H-N3
frg_262	C3H-N3-C3-C3H
frg_263	OH-C3-N3-C3H
frg_264	OH-N3-C3H-C3H
frg_265	C3H-N3-C3H-C3H
frg_266	OH-C3H-N3-C3H
frg_267	C3H-N3-C3H-C3
frg_268	C3H-C3H-N3-C3
frg_269	OH-N3-C3H-N2
frg_270	N2-C3H-N3-C3H
frg_271	N3-C3H-C3H-N2
frg_272	OH-C3-C3H-N3
frg_273	N3-C3H-C3-C3H
frg_274	N3-C3H-C3-N3
frg_275	N3-C3H-C3H-N3
frg_276	OH-N3-C3H-OH
frg_277	OH-N3-C3H-C3
frg_278	OH-N3-C3-C3H
frg_279	OH-C3H-C3-N3
frg_280	OH-C3H-C3H-C3
frg_281	OH-N3-C3-OH
frg_282	OH-C3-C3H-C3H
frg_283	N3-C3-C3H-C3H
frg_284	N3-C2-N3H-C2
frg_285	OH-N3-C2-N3H
frg_286	N3H-C2-N3-C3H
frg_287	OH-C3H-N3-C2
frg_288	C3H-C3H-N3-C2
frg_289	N3H-C3H-C3H-N3
frg_290	N3-C3H-C3H-C3H
frg_291	N3H-C2=C2-N3
frg_292	N3-C2=C2-C2
frg_293	OH-N3-C2=C2
frg_294	C3H-C3H-N3H-C2
frg_295	C3H-N3-C2=C2
frg_296	OH-C3H-C3H-N3H
frg_297	N3H-C3H-C3H-C3H
frg_298	O=C2-C2-C3H3
frg_299	C3H3-C2-C2-C2
frg_300	N2=C2-C2-C2
frg_301	N3-C3H-C2-C2
frg_302	C3H-N3-C3H-C2
frg_303	N3H-C2-C3H-N2
frg_304	N2-C3H-C3H-N2
frg_305	N3-C3H-C2=N2
frg_306	OH-C3H-C2=N2
frg_307	C3H-N2=C2-C3H
frg_308	N3H-C2=C2-N2
frg_309	C2=N2-C2=C2
frg_310	C2-N3-C3H-C2
frg_311	N3-C3H-C2-C3H
frg_312	N3-C2=C2-N2
frg_313	OH-C3H-C2-C3H
frg_314	C3H-C3H-C2-C3H
frg_315	C3H-C2=N2-C2
frg_316	O=C2-C2-N2
frg_317	N2-C2-C2-N2
frg_318	N2=C2-C3H-C3H
frg_319	O-C3H2-C3H-C3H
frg_320	P3-O-C3H2-C3H
frg_321	OH-C3H-C3H2-O
frg_322	O-P3-O-C3H2
frg_323	P3-O-P3-O
frg_324	P3-O-P3-OH
frg_325	P3-O-P3=O
frg_326	N3H2-C2=C2H-C2H
frg_327	OH-C2-C2H=C2H
frg_328	OH-C2-C3H-N3H2
frg_329	O=C2-C3H-N3H2
frg_330	O=C2H-C3H-N3H2
frg_331	OH-C2-C3H-C2H
frg_332	O=C2-C3H-C2H
frg_333	O=C2H-C3H-C2
frg_334	C2H-C2H=C2H-C2H
frg_335	OH-C3H2-C3-C3H3
frg_336	O-C3H2-C3H-C3
frg_337	OH-C3-C3H-C3H2
frg_338	OH-C3H2-C3-OH
frg_339	OH-C3H2-C3-C3H
frg_340	O=C2H-C3H2-Cl
frg_341	OH-C3H2-C3H2-Cl
frg_342	OH-C2-C3H2-C3
frg_343	Cl-C3-C3H2-C2
frg_344	O-C3-C3H2-C2
frg_345	C2H-C3-C3H2-C2
frg_346	O=C2-C3H2-C3
frg_347	C3H2-C3-C2H=C2H
frg_348	C3H2-C3-O-C2
frg_349	C3-C2H=C2H-C2
frg_350	O=C2-O-C3
frg_351	C3-O-C2-C2H
frg_352	Cl-C3-C2H=C2H
frg_353	Cl-C3-O-C2
frg_354	O-C2-C2H=C2H
frg_355	O-C3-C2H=C2H
frg_356	C2H-C3-O-C2
frg_357	C3H3-C3H-C3H-C3H
frg_358	C3H3-C3H-C3H-C2
frg_359	OH-C2-C3H-C3H
frg_360	C2-C3H-C3H-C2
frg_361	C3H-C3H2-C2-C2
frg_362	OH-C2-C2-C3H2
frg_363	O=C2-C2-C3H2
frg_364	C3H3-C3-C2-C2
frg_365	OH-C2-C2-C3
frg_366	O=C2-C2-C3
frg_367	C3H2-C3-C2-C2
frg_368	OH-C3H2-C3-C2
frg_369	O-C3H2-C3-C3H3
frg_370	O-C2-C2-C3
frg_371	C3-C3H2-O-C2
frg_372	O=C2-O-C3H2
frg_373	C3H2-O-C2-C2
frg_374	O=C2-C2-O
frg_375	O-C3H2-C3-C2
frg_376	OH-C3H2-C3H-O
frg_377	C3H2-C3H-O-C3H
frg_378	OH-C3H-O-C3H
frg_379	O-C3H-C3H2-C3H
frg_380	OH-C3H-C3H2-C3H
frg_381	C3H-C3H2-C3H-C3H
frg_382	C3H-O-C3H-C3H
frg_383	C3H3-S3-C3H2-C3H2
frg_384	S3-C3H2-C3H2-C2
frg_385	C3H2-C3H2-C2-C2
frg_386	C3H2-C2-C2=C2H
frg_387	O-C2H=C2-C2
frg_388	P3-O-C2H=C2
frg_389	OH-C2=C2H-O
frg_390	OH-P3-O-C2H
frg_391	O=P3-O-C2H
frg_392	C2-C3H2-C3H2-C2
frg_393	OH-C2=C2H-C2H
frg_394	OH-C2-C2-OH
frg_395	OH-C2-C3H-C2
frg_396	O=C2-C3H-C2
frg_397	C3H3-C3H2-C3H-C3H3
frg_398	C3H3-C3H2-C3H-C2
frg_399	C3H2-C3H-C2-C2
frg_400	O=C2-C3H-C3H3
frg_401	C3H3-C3H-C2-C2
frg_402	N3H2-C2-C3H2-C3H2
frg_403	C3H3-C3H-C3H-C3H3
frg_404	S3-C2-C3H-C3H
frg_405	OH-C3H-C3H-C3H3
frg_406	C3H2-S3-C2-C3H
frg_407	S3-C2-C3H-C3H3
frg_408	C3H2-C3H2-S3-C2
frg_409	O=C2-S3-C3H2
frg_410	S3-C3H2-C3H2-N3H
frg_411	N3H-C3H2-C3H2-C2
frg_412	C3H2-N3H-C2-C3H
frg_413	OH-C3H-C2-N3H
frg_414	N3H-C2-C3H-C3
frg_415	O-C3H2-C3-C3H
frg_416	P3-O-C3H2-C3
frg_417	O-C3H2-C3H-O
frg_418	O-C3H-C3H-C3H2
frg_419	n-C3H-O-C3H
frg_420	O-C3H-n:cH
frg_421	O-C3H-n:[c.]
frg_422	O-C3H-C3H-O
frg_423	n:[c.]:n-C3H
frg_424	C3H-n:[c.]:[c.]
frg_425	n:cH:n-C3H
frg_426	cH:n-C3H-C3H
frg_427	C3H-C3H-n:[c.]
frg_428	OH-C3H-C3H-n
frg_429	n-C3H-C3H-C3H
frg_430	C3H3-C3H-C2-C3H3
frg_431	S3-C2-C3H-C2
frg_432	C3H3-C2-C3H-C2
frg_433	S3-C2-C3H-C3H2
frg_434	C3H3-C2=C2H-C3H2
frg_435	C3H2-C3H2-C2H=C2
frg_436	C2H-C3H2-C3H2-C2
frg_437	C3H3-C2-C3H2-C3H2
frg_438	C3H2-C3H2-C2=C2H
frg_439	C3H2-C2H=C2-C3H2
frg_440	C2=C2H-C3H2-c
frg_441	cH:c-C3H2-C2H
frg_442	C2H-C3H2-c:c
frg_443	cH:c-O-C3H3
frg_444	C3H3-O-c:c
frg_445	O-c:c:c
frg_446	OH-c:c-O
frg_447	O-c:cH:cH
frg_448	C3H2-C3H2-C2H=C2H
frg_449	C3H3-C2H=C2H-C3H2
frg_450	cH:c:c-C3H2
frg_451	cH:cH:cH:cH
frg_452	O=C2-C3H2-C3H3
frg_453	C3H3-C3H2-C2-C2
frg_454	OH-C3H2-C3H-C2
frg_455	P3-O-C3H-C3H2
frg_456	OH-C2-C3H-O
frg_457	O=C2-C3H-O
frg_458	P3-O-C3H-C2
frg_459	P3-O-C3-C3H3
frg_460	OH-P3-O-C3
frg_461	O=P3-O-C3
frg_462	P3-O-C3-C3H2
frg_463	OH-C3H2-C3-O
frg_464	OH-C3H-C3-O
frg_465	O-C3-C3H-C3H2
frg_466	P3-O-C3-C3H
frg_467	N3-C3H-O-C3H
frg_468	O-C3H-N3-C2H
frg_469	O-C3H-N3-C2
frg_470	N2-C2-N3-C3H
frg_471	O=C2-N3-C3H
frg_472	C3H-N3-C2H=C2H
frg_473	C3H-C3H-N3-C2H
frg_474	OH-C3H-C3H-N3
frg_475	N3-C2-N2=C2
frg_476	N3-C2H=C2H-C2
frg_477	N3H2-C2-C2H=C2H
frg_478	N2-C2-N3-C2H
frg_479	O=C2-N3-C2H
frg_480	C2H-C2=N2-C2
frg_481	C2H=C2H-N3-C2
frg_482	O-C3H2-C3H-C2
frg_483	OH-C3H-C2-Cl
frg_484	OH-C3H-C2H=C2
frg_485	C3H-C2H=C2-C3H
frg_486	Cl-C2=C2H-C3H
frg_487	Cl-C3H-C2=C2H
frg_488	C2H=C2-C3H-C2H
frg_489	Cl-C2-C3H-C2H
frg_490	C2=C2H-C3H-C2
frg_491	Cl-C3H-C2-Cl
frg_492	Cl-C3H-C2H=C2
frg_493	C3H3-C3H-C3H2-C3H
frg_494	N3H2-C3H-C3H2-C3H
frg_495	C3H-C3H2-C3H-C2
frg_496	OH-c:c-Cl
frg_497	OH-C3H2-C2=O
frg_498	OH-C3H2-C2-C3H
frg_499	OH-C3H-C2-C3H2
frg_500	O-P3-O-C3
frg_501	C3H3-C2-C2H=C2H
frg_502	C3H3-C3H-C3H2-C2
frg_503	C2-c:cH:c
frg_504	C3H3-C2-C3H2-C2
frg_505	O=C2-C3H2-C2
frg_506	S3-C2-C3H2-C2
frg_507	C3H2-S3-C2-C3H2
frg_508	N3H2-C3H2-C3H2-C2H
frg_509	O=C2H-C3H2-C3H2
frg_510	C3H3-C3-C2-C3H2
frg_511	C3H2-C3H2-C2-C3
frg_512	C3H2-C3-C2-C3H2
frg_513	C3H2-C3H-C3-C2
frg_514	C3H2-C3H2-C3-C2
frg_515	C3H-C3-C2=C2H
frg_516	C3H2-C2-C3-C3H
frg_517	C3H-C3H-C3H2-C2H
frg_518	C3H-C3H-C3-C2
frg_519	C3H-C3H2-C2H=C2
frg_520	C3H2-C2H=C2-C3
frg_521	C3H2-C3-C2=C2H
frg_522	C3H3-C3-C2=C2H
frg_523	C3H-C3H2-C2=C2H
frg_524	C3H-C3H2-C2-C3
frg_525	O=C2-C3-C3H
frg_526	OH-C3-C3H-C3H3
frg_527	C3H3-C3H-C3-C3H2
frg_528	C3H3-C3H-C3-C2
frg_529	OH-C2-C3-C3H
frg_530	C3H-C3-C3H2-C2
frg_531	OH-C3-C3H2-C2
frg_532	C2-C3H2-C3-C2
frg_533	N3H2-C3H-C3H2-Cl
frg_534	Cl-C3H2-C3H-C2
frg_535	N1#C1-c:cH
frg_536	n:cH:c-C1
frg_537	cH:cH:c-C1
frg_538	cH:n:cH:c
frg_539	n:cH:cH:cH
frg_540	n:cH:c:cH
frg_541	cH:n:cH:cH
frg_542	C3H-C3H-C2-C2H
frg_543	C3H2-C2=C2H-C2
frg_544	O=C2-C2H=C2
frg_545	C3H-C2-C2H=C2
frg_546	OH-C3H-C2-C2H
frg_547	C2-C2H=C2-C2
frg_548	C3H-C3H-C2H=C2
frg_549	C3H-C3H-O-C2
frg_550	C3H-O-C2=C2H2
frg_551	C3H-O-C2-C2
frg_552	C3H-C3H-C3H-C2H
frg_553	C3H2-C2=C2H-C3H
frg_554	O-C3H-C2H=C2
frg_555	P3-O-C3H-C2H
frg_556	C3H-C2H=C2-C2
frg_557	OH-C2-C2-O
frg_558	OH-C2-C2=C2H2
frg_559	O=C2-C2=C2H2
frg_560	P3H-C3H2-C2-C2
frg_561	OH-P3H-C3H2-C2
frg_562	O=P3H-C3H2-C2
frg_563	P3H-C3H2-C2=O
frg_564	C3H3-C3-C3H2-C2
frg_565	S3-C2-C3H2-C3
frg_566	C3H2-C3-C3H2-C2
frg_567	OH-C3H-C3H2-[N3+]
frg_568	N3H2-c:c:cH
frg_569	N3H2-c:c-C2
frg_570	OH-c:c-N3H2
frg_571	OH-C2-C3H-C3H3
frg_572	OH-C3H2-C3H-C3H3
frg_573	N3H2-C3H-C3H2-C2
frg_574	C3H-C3H2-C2-c
frg_575	cH:c-C2-C3H2
frg_576	C3H2-C2-c:c
frg_577	C2-C3H2-C3H-C2
frg_578	S3-C2-C3H2-C3H
frg_579	C3H2-c:cH:c
frg_580	O-c:cH:[c.]
frg_581	c:cH:[c.]:c
frg_582	c:cH:[c.]:[c.]
frg_583	c:cH:cH:[c.]
frg_584	n:[c.]:cH:cH
frg_585	cH:cH:[c.]:[c.]
frg_586	cH:c:cH:[c.]
frg_587	cH:[c.]:[c.]:c
frg_588	cH:[c.]:[c.]:cH
frg_589	cH:n:[c.]:cH
frg_590	cH:c:[c.]:[c.]
frg_591	C3H-c:[c.]:[c.]
frg_592	cH:cH:n:[c.]
frg_593	n:cH:cH:c
frg_594	n:[c.]:[c.]:cH
frg_595	cH:cH:c-C3H
frg_596	cH:cH:c:[c.]
frg_597	cH:c:[c.]:cH
frg_598	OH-C3H-c:cH
frg_599	cH:c-C3H-C3H
frg_600	C3H2-C3H-C3H-c
frg_601	N3-C3H-C3H-c
frg_602	C3H2-N3-C3H-C3H
frg_603	cH:[c.]:c-C3H
frg_604	OH-C3H-c:[c.]
frg_605	C3H-N3-C3H2-C3
frg_606	C3H2-C3H2-N3-C3H
frg_607	C3H2-C3H-C3H2-C3H
frg_608	C3H-C3H2-C3H-C3
frg_609	C3H-C3H-c:[c.]
frg_610	C3H2-C3H-C3-C2H
frg_611	C3H2-N3-C3H-C3H2
frg_612	C3H-C3-C2H=C2H2
frg_613	N3-C3H2-C3-C3H
frg_614	N3-C3H2-C3H2-C3H
frg_615	N3-C3H-C3H2-C3H
frg_616	C3H2-N3-C3H2-C3H2
frg_617	C3H2-N3-C3H2-C3
frg_618	OH-C3-C3H2-N3
frg_619	N3-C3H2-C3-C2H
frg_620	C3H2-C3-C2H=C2H2
frg_621	OH-C3-C2H=C2H2
frg_622	C3H2-C2-C3H2-C2
frg_623	C3H-C2-C3H-C2
frg_624	OH-C2-C3H2-C2
frg_625	O-C3H-O-C3H
frg_626	O-C3H-C3H-C2
frg_627	S3H-C3H2-C2-C2
frg_628	S3H-C3H2-C2=O
frg_629	C3H3-C2=C2H-C2
frg_630	S3-C2-C2H=C2
frg_631	C3H2-S3-C2-C2H
frg_632	C2H-c:cH:c
frg_633	cH:cH:c-C2H
frg_634	O=C2H-c:cH
frg_635	OH-C3H2-c:cH
frg_636	C3H3-C3H-C3H-C3H2
frg_637	C3H3-C3H-C3H-C3
frg_638	C3H3-C3H-C3H2-C3H2
frg_639	S3-C2-C3H2-C3H2
frg_640	O-C2-C3H2-C2
frg_641	C2H=C2-C3H2-C2
frg_642	C3H2-C2-O-C2
frg_643	C2=C2H-C3H2-C2
frg_644	O=C2-O-C2
frg_645	O-C2-C3H2-C2H
frg_646	O-C2=C2H-C3H2
frg_647	C2H=C2-O-C2
frg_648	O=C2-C3H2-C2H
frg_649	O-C3H2-C3H-N3H2
frg_650	OH-C2-C3H2-c
frg_651	cH:c-C3H2-C2
frg_652	O=C2-C3H2-c
frg_653	n:cH:c-C3H2
frg_654	S3-C3H2-C3H-N3H2
frg_655	OH-S3-C3H2-C3H
frg_656	O=S3-C3H2-C3H
frg_657	S3-C3H2-C3H-C2
frg_658	S3-C3H2-C2-C2
frg_659	OH-S3-C3H2-C2
frg_660	O=S3-C3H2-C2
frg_661	S3-C3H2-C2=O
frg_662	C3H2-C3H2-C3H2-c
frg_663	N3H2-C3H-C3H-C3H
frg_664	OH-C3H-C3H-N3H2
frg_665	C3H-O-C3H2-C3H
frg_666	O-C3H-O-C3H2
frg_667	C3H2-O-C3H-C3H
frg_668	P3-O-C3H-O
frg_669	N3H2-C3H-C3H-C2H
frg_670	O-C3H-C3H-N3H2
frg_671	N3H2-C3H-C2H=C2H
frg_672	C2H=C2H-C2=C2H
frg_673	C2H-C3H-C3H-C2H
frg_674	O-C3H-C3H-C2H
frg_675	C3H-C2H=C2-C2H
frg_676	C2H-C3H-O-C2
frg_677	OH-C2-c:nH
frg_678	O=C2-c:nH
frg_679	nH:c:c:n
frg_680	nH:c:c-N3H2
frg_681	nH:cH:n:c
frg_682	cH:n:c:c
frg_683	cH:nH:c:c
frg_684	cH:nH:c-C2
frg_685	n:c:c-C2
frg_686	n:cH:nH:c
frg_687	N3H2-C3H2-C3H2-C3H2
frg_688	C3H2-C3H2-C3H2-C2H
frg_689	OH-C2-C2H=C2
frg_690	O-C2=C2H-C2
frg_691	C2H-C2=C2H-C2
frg_692	C2-C2H=C2H-C2
frg_693	C2H-C2-O-C2
frg_694	C2H-C2-C3H2-C2
frg_695	N3H2-C2=N2-C3H2
frg_696	C3H2-C3H2-N2=C2
frg_697	N2-C3H2-C3H2-C3H2
frg_698	N2-C3H-C3H2-C3H2
frg_699	N3H-C2-C3H-C3H2
frg_700	C3H2-C3H-N2=C2H
frg_701	C3H-C2-N3H-C2H
frg_702	N3H-C2H=N2-C3H
frg_703	N2=C2H-N3H-C2
frg_704	O=C2-N3H-C2H
frg_705	C2H=N2-C3H-C2
frg_706	C3H-C3H2-C3H2-C2H
frg_707	C3-C3H2-C2-C2
frg_708	C3H2-C2-N3H-C3H
frg_709	S3H-C3H2-C3H-N3H
frg_710	S3H-C3H2-C3H-C2
frg_711	C3H3-[N3+]-C3H2-C3H2
frg_712	C3H2-C3H2-C3H2-[N3+]
frg_713	N3H-C2=C2-[N_Pl3+]
frg_714	C2H=[N_Pl3+]-C2=C2
frg_715	C3H-[N_Pl3+]-C2=C2
frg_716	N3H-C3H2-C3H-[N_Pl3+]
frg_717	C3H2-C3H-[N_Pl3+]=C2H
frg_718	C3H2-C3H-[N_Pl3+]-C2
frg_719	C3H-[N_Pl3+]-C2-C2
frg_720	N3-C2H=[N_Pl3+]-C3H
frg_721	C3H2-N3-C2H=[N_Pl3+]
frg_722	N3-C2H=[N_Pl3+]-C2
frg_723	N3-C3H2-C3H-[N_Pl3+]
frg_724	C2H=[N_Pl3+]-C2-C2
frg_725	O=C2-C2-[N_Pl3+]
frg_726	N2-C2-C2-[N_Pl3+]
frg_727	c-N3-C2H=[N_Pl3+]
frg_728	OH-C3H2-C3H-C3H2
frg_729	O-P3-O-C3H
frg_730	C3H-O-C3H2-C2
frg_731	O-C3H2-C2-C3H
frg_732	N3H-C2-C2H=C2H
frg_733	N3H-C2-N3-C2H
frg_734	C2H-C2-N3H-C2
frg_735	C3H3-C3H-O-C3H
frg_736	C2H-N3-C2=C2
frg_737	N3H-C3H2-C3H-N3
frg_738	C3H2-C3H-N3-C2H
frg_739	C3H2-C3H-N3-C2
frg_740	C3H-N3-C2-C2
frg_741	O=C2H-N3-C3H
frg_742	C3H-C3H2-N3H-c
frg_743	cH:c-N3H-C3H2
frg_744	N3H-c:cH:cH
frg_745	O=C2-C2-N3
frg_746	N3-C2-C2-N2
frg_747	C2H-N3-C2-C2
frg_748	O=C2H-N3-C2
frg_749	nH:[c.]:[c.]:c
frg_750	nH:[c.]:[c.]:cH
frg_751	nH:[c.]:cH:cH
frg_752	nH:cH:c-C3H2
frg_753	nH:cH:c:[c.]
frg_754	cH:c-C3H2-C3H
frg_755	cH:nH:[c.]:cH
frg_756	cH:nH:[c.]:[c.]
frg_757	N3H2-C3H-C3H2-c
frg_758	C2-C3H-C3H2-c
frg_759	c:cH:nH:[c.]
frg_760	cH:[c.]:c-C3H2
frg_761	C3H2-c:[c.]:[c.]
frg_762	C3H-C3H2-c:[c.]
frg_763	OH-c:cH:[c.]
frg_764	C3H3-N3-C2-C2
frg_765	C3H3-N3-C2=C2
frg_766	C3H3-N3-C3H-C3H2
frg_767	C3H3-N3H-C3H2-C2
frg_768	N3H-C3H2-C2=C2H
frg_769	N3H-C3H2-C2-C2
frg_770	N2-C2-C2-C3H2
frg_771	N3-C2H=C2-C3H2
frg_772	C3H-N3-C2H=C2
frg_773	C2=C2H-N3-C2
frg_774	Se-C2-N3-C2H
frg_775	N2=C2-N3-C2H
frg_776	N2-C2-C2=C2H
frg_777	N3-C2=N2-C2
frg_778	N3-C2H=C2-C2
frg_779	Se-C2-N3-C3H
frg_780	N2=C2-N3-C3H
frg_781	Se-C2=N2-C2
frg_782	S3H-C2-N3-C2H
frg_783	S3H-C2-N3-C3H
frg_784	S3H-C2=N2-C2
frg_785	C3H3-S3-C3H2-C3H
frg_786	S3-C3H2-C3H-O
frg_787	S3-C3H2-C3H-C3H
frg_788	N3H2-C3H-O-C3H
frg_789	N3H-C3H2-C2-N3H
frg_790	N3H-C3H-O-C3H
frg_791	C2H-N3H-C3H2-C2
frg_792	O-C3H-N3H-C2
frg_793	O=C2-C3H2-N3H
frg_794	O=C2H-N3H-C3H2
frg_795	N3H2-C3H2-C2-N3H
frg_796	N3H2-c:n-C3H
frg_797	N3H2-c:cH:n
frg_798	O-C3H-n:c
frg_799	C3H-C3H-n:c
frg_800	n:cH:n:cH
frg_801	cH:n:c:cH
frg_802	cH:c:n-C3H
frg_803	n:cH:c:n
frg_804	N3H2-C2-C3H2-N3H
frg_805	O-C3H-N2=C2
frg_806	C3H2-C2=N2-C3H
frg_807	N3H-C3H2-C2=N2
frg_808	N2-C3H-C3H-C3H
frg_809	OH-C3H-C3H-N2
frg_810	N2-C3H-O-C3H
frg_811	nH:c:c-N3H
frg_812	N3H-c:n:cH
frg_813	n:c-N3H-C2
frg_814	N3H2-C2-N3H-c
frg_815	O=C2-N3H-c
frg_816	N3H-c:c-C2
frg_817	C2-N3H-c:c
frg_818	C3H2-N3H-c:c
frg_819	C3H2-C3H2-N3H-c
frg_820	n:c-N3H-C3H2
frg_821	N3H-c:c:cH
frg_822	N3H-c:c-N3H
frg_823	N3H-C3H2-C3H2-N3H
frg_824	n:cH:c:c
frg_825	n:c:c:cH
frg_826	N3H-c:c:n
frg_827	N3H-c:cH:n
frg_828	C3H2-C3H2-C3H-C2H
frg_829	C3H2-C3H-C2H=C2H
frg_830	C3H-C2H=C2H-C3H
frg_831	C3H2-C2H=C2H-C3H2
frg_832	C3H2-C2-O-C3H
frg_833	C3H-O-C2=C2H
frg_834	O-C2-C3H2-C3H
frg_835	N3H-C3H-N2=C2
frg_836	N3H-C3H-C3H-C2
frg_837	C3H2-N3H-C3H-C3H
frg_838	N3H-C3H-C3H-N2
frg_839	C3H-N3H-C3H2-C2
frg_840	N2-C3H-N3H-C3H2
frg_841	N3H-C3H2-C2-C3H
frg_842	C3H3-C3-C3H-[N3^]
frg_843	C3H3-C3-S3-[C3^H]
frg_844	C3-C3H-[N3^]-[C2^]
frg_845	C3-C3H-[N3^]-[C3^H]
frg_846	C3-S3-[C3^H]-[C3^H]
frg_847	C3-S3-[C3^H]-[N3^]
frg_848	S3-[C3^H]-[N3^]-[C2^]
frg_849	S3-[C3^H]-[N3^]-C3H
frg_850	S3-[C3^H]-[C3^H]-N3H2
frg_851	S3-[C3^H]-[C3^H]-[C2^]
frg_852	S3-C3-C3H-[N3^]
frg_853	S3-C3-C3H-C2
frg_854	C2-C3H-[N3^]-[C3^H]
frg_855	[C3^H]-[N3^]-[C2^]-[C3^H]
frg_856	O=[C2^]-[N3^]-[C3^H]
frg_857	O=[C2^]-[C3^H]-[C3^H]
frg_858	[N3^]-[C2^]-[C3^H]-[C3^H]
frg_859	C3H-C3-S3-[C3^H]
frg_860	C3H-[N3^]-[C2^]-[C3^H]
frg_861	[C3^H]-[C3^H]-[N3^]-[C2^]
frg_862	C3H-[N3^]-[C3^H]-[C3^H]
frg_863	O=[C2^]-[C3^H]-N3H2
frg_864	N3H2-[C3^H]-[C2^]-[N3^]
frg_865	N3H2-[C3^H]-[C3^H]-[N3^]
frg_866	C2-C3H-[N3^]-[C2^]
frg_867	[N3^]-[C3^H]-[C3^H]-[C2^]
frg_868	O=[C2^]-[N3^]-C3H
frg_869	OH-C2-C3H-[N3^]
frg_870	O=C2-C3H-[N3^]
frg_871	N3H2-C3H-C3H2-C3H2
frg_872	C3H2-C2=C2H-[N1+]
frg_873	N1#[N1+]-C2H=C2
frg_874	OH-C2=C2H-[N1+]
frg_875	C3H2-N2=C2-C2H
frg_876	C3H2-N2=C2-C2
frg_877	N2-C2=N2-C3H2
frg_878	N2=C2-C2-C2H
frg_879	N2=C2-C2=N2
frg_880	N2=C2-N2=C2H
frg_881	N2-C3H2-C3H2-N2
frg_882	N2=C2H-C2-C2
frg_883	N2-C2H=N2-C2
frg_884	N2=C2H-N2=C2H
frg_885	N2-C2-C2-C2H
frg_886	N2=C2-C2-N2
frg_887	C2H-N2=C2H-C2
frg_888	C2H=N2-C2-C2
frg_889	N2=C2H-C2=N2
frg_890	OH-C3H-C3H2-C2H
frg_891	C2H-C3H2-C3H-C2H
frg_892	C2H=C2H-C2H=C2H
frg_893	C2-N3H-C3H2-C2
frg_894	N3H-C3H2-C2-C3H2
frg_895	C3H2-C2=N2-C2
frg_896	C2-C3H2-N3H-c
frg_897	nH:c:c:c
frg_898	nH:c:c-C2
frg_899	nH:c-N3H-C2
frg_900	nH:cH:c:c
frg_901	cH:c:c-C2
frg_902	N3H2-C3H2-c:cH
frg_903	N3H-c:nH:cH
frg_904	N3H-c:c:c
frg_905	N2-C2-c:c
frg_906	c:nH:cH:c
frg_907	C3H2-c:c-C2
frg_908	N3H2-C3H2-c:c
frg_909	C2=N2-C2-c
frg_910	N2=C2-N3H-c
frg_911	C3H-C3-C3H-C2
frg_912	C3H2-C3H-C2=C2H
frg_913	C3H2-C3H-C2-C3H
frg_914	C3H-C2-C3H-C3
frg_915	C2-C3H-C3-C2
frg_916	C2=C2H-C2H=C2
frg_917	C3H2-C2=C2H-C2H
frg_918	C3-C2=C2H-C2H
frg_919	C3-C3H-C2=C2H
frg_920	C3H3-C3H-C2-C3H2
frg_921	C3H2-C3H2-C2-C3H
frg_922	N3H2-C3H-C2-C3H2
frg_923	OH-C3H2-C3H2-OH
frg_924	OH-C3H-C2-C3H3
frg_925	C3H3-C2-S3-C3H2
frg_926	O-C3H2-C2H=C2
frg_927	P3-O-C3H2-C2H
frg_928	O-C3H-C3H-N3H
frg_929	C3H3-C2-N3H-C3H
frg_930	N3H-C3H-C3H-N3H
frg_931	N3H-C2-C3H2-C3H
frg_932	P3-O-C2-C3H3
frg_933	OH-P3-O-C2
frg_934	O=P3-O-C2
frg_935	P3-O-C2=O
frg_936	C3H3-C2-O-C3H2
frg_937	C3H2-C3H2-O-C2
frg_938	O-C3H2-C3H2-[N3+]
frg_939	O-C3H-O-C2
frg_940	C3H-C3H2-O-C2
frg_941	nH:[c.]:[c.]:n
frg_942	nH:[c.]:c:n
frg_943	nH:[c.]:c-N3H2
frg_944	nH:cH:n:[c.]
frg_945	cH:nH:[c.]:c
frg_946	n:cH:nH:[c.]
frg_947	S3-C3H2-C3H2-C3H
frg_948	C3H2-S3-C3H2-C3H2
frg_949	C3H2-S3-C3H2-C3H
frg_950	N3H-c:[c.]:n
frg_951	C3H-N3H-c:[c.]
frg_952	C3H2-C3H-N3H-c
frg_953	C2-C3H-N3H-c
frg_954	N3H-C3H-C3H2-C2
frg_955	N3H-c:[c.]:[c.]
frg_956	n:c-N3H-C3H
frg_957	N3H2-C2-c:n
frg_958	N3H2-C2-c:c
frg_959	cH:n:c-C2
frg_960	O=C2-c:n
frg_961	C3H-n:c:c
frg_962	n:c:c:n
frg_963	N3H2-c:c:n
frg_964	N3H2-C2-N3H-C3H
frg_965	N3H-C3H-N3H-C2
frg_966	N3H-C3H-C2-N3H
frg_967	N3H-C2-N3H-C3H
frg_968	N3H2-C3H-C3H-C3H3
frg_969	N3H2-C2-C3H-N3H
frg_970	N3H2-C2-C3H-C3H2
frg_971	C3H-C3H-O-C3
frg_972	C3H2-C3-O-C3H
frg_973	O-C3-O-C3H
frg_974	C3H-O-C3-C2
frg_975	OH-C2-C3-O
frg_976	O=C2-C3-O
frg_977	O-C3-C3H2-C3H
frg_978	OH-C3H-C3H2-C3
frg_979	C3H-C3H-C3H2-C3
frg_980	N3H-C3H-C3H-C3H2
frg_981	C3H-C3H2-C3-C2
frg_982	cH:c:c-C3H3
frg_983	C3H3-c:c-C3H3
frg_984	C3H3-c:cH:[c.]
frg_985	c:c:cH:[c.]
frg_986	n:[c.]:cH:c
frg_987	cH:[c.]:n-C3H
frg_988	O-C3H-C2H=C2H
frg_989	C2H-C3H-C3H-[C3^H]
frg_990	C2H-C3H-O-[C3^H]
frg_991	C3H-C3H-[C3^H]-[C3^H2]
frg_992	C3H-C3H-[C3^H]-[O^]
frg_993	C3H-O-[C3^H]-[C3^H2]
frg_994	C3H-O-[C3^H]-[O^]
frg_995	O-[C3^H]-[O^]-[C3^H]
frg_996	O-[C3^H]-[C3^H2]-[C3^H]
frg_997	O-C3H-C3H-[C3^H]
frg_998	[C3^H2]-[C3^H]-[O^]-[C3^H]
frg_999	C3H-[C3^H]-[O^]-[C3^H]
frg_1000	[O^]-[C3^H]-[C3^H2]-[C3^H]
frg_1001	C3H-[C3^H]-[C3^H2]-[C3^H]
frg_1002	C3H-C3H-O-[C3^H]
frg_1003	C3H2-C3H-[C3^H]-[C3^H2]
frg_1004	C2H-C3H2-C3H-[C3^H]
frg_1005	C3H2-C3H-[C3^H]-[O^]
frg_1006	N3H2-C3H2-C2-C3H3
frg_1007	C3H3-c:n:c
frg_1008	cH:n:c-C3H3
frg_1009	c:n:c:c
frg_1010	N3H2-c:n:c
frg_1011	c:n:cH:c
frg_1012	n:c:n:c
frg_1013	O-C3H2-c:cH
frg_1014	n:c:n:cH
frg_1015	P3-O-C3H2-c
frg_1016	N3H2-c:c-C3H2
frg_1017	n:c:c-C3H2
frg_1018	O-C3H2-c:c
frg_1019	OH-C3H2-C2-C3H2
frg_1020	OH-C3H2-C2=N2
frg_1021	N3H2-C3H-C2-C3H3
frg_1022	P3-O-C3H2-C3H3
frg_1023	S2=P3-O-C3H2
frg_1024	O-P3-O-c
frg_1025	P3-O-c:cH
frg_1026	S2=P3-O-c
frg_1027	N3H2-c:cH:cH
frg_1028	N3H2-C2=C2-N3H
frg_1029	N3H2-C2-C2-N3H
frg_1030	C2-N3H-C2-C2
frg_1031	N3H-C2-C2=C2
frg_1032	OH-C3H-C3H2-N3H
frg_1033	N3H-C3H2-C3H-C3H
frg_1034	S3-O-P3-O
frg_1035	P3-O-S3-OH
frg_1036	P3-O-S3=O
frg_1037	S3-O-P3-OH
frg_1038	S3-O-P3=O
frg_1039	OH-C3H-O-C3H2
frg_1040	O=C2H-C3H-C3H
frg_1041	OH-C3H-C2H=O
frg_1042	C2H=C2H-C3H2-C2H
frg_1043	C3H-C2-C2=C2
frg_1044	OH-C2-O-C3H
frg_1045	C3H-O-C2=C2
frg_1046	OH-C2=C2-O
frg_1047	O-C2=C2-C2
frg_1048	O-C3H-C2-C2
frg_1049	C2-O-C3H-C2
frg_1050	OH-C2=C2-OH
frg_1051	OH-C2=C2-C2
frg_1052	N3H2-C2-C3H2-C3H
frg_1053	C3H3-C3H2-N3-C3H2
frg_1054	N3-C3H2-C3H2-C3H2
frg_1055	C3H3-C3H-N3H-c
frg_1056	N3H-c:[c.]:cH
frg_1057	cH:cH:[c.]:c
frg_1058	[c.]:n:[c.]:[c.]
frg_1059	cH:[c.]:c:[c.]
frg_1060	[c.]:c:[c.]:[c.]
frg_1061	Cl-c:cH:[c.]
frg_1062	cH:[c.]:n:[c.]
frg_1063	N3H2-C3H2-C3H2-C2
frg_1064	O-C3H-C3H2-C3H2
frg_1065	S3-O-C3H-C3H2
frg_1066	OH-S3-O-C3H
frg_1067	O=S3-O-C3H
frg_1068	C3H3-[N3+]-C3H2-C2
frg_1069	OH-C2-C3H2-[N3+]
frg_1070	O=C2-C3H2-[N3+]
frg_1071	C3H3-[N3+]-C3H2-C2H
frg_1072	O=C2H-C3H2-[N3+]
frg_1073	nH:c-C2H=C2
frg_1074	nH:c:c-C3H3
frg_1075	nH:c:c-C3H2
frg_1076	nH:c-C3H2-c
frg_1077	C3H3-c:c:c
frg_1078	c:c:c:c
frg_1079	c:c-C3H2-c
frg_1080	c:nH:c:c
frg_1081	C2H-c:nH:c
frg_1082	C3H2-c:nH:c
frg_1083	C3H2-c:c-C3H2
frg_1084	C2H-c:c:c
frg_1085	C3H3-c:c-C3H2
frg_1086	C2=C2H-c:c
frg_1087	C3H3-c:c-C2H
frg_1088	N3H-C2=C2H-c
frg_1089	C2-C2=C2H-c
frg_1090	C2H=C2-C2=C2
frg_1091	C2H=C2-C2-C2H
frg_1092	C2H=C2-N3H-C2
frg_1093	C2H2=C2H-C2-C2
frg_1094	C3H3-C2=C2-C2
frg_1095	N3H-C2-C2-C3H3
frg_1096	N3H-C2-C2-C2H
frg_1097	C2H2=C2H-C2=C2
frg_1098	C3H3-C2=C2-C2H
frg_1099	C3H3-C2-C2=C2H
frg_1100	C3H2-c:c-C2H
frg_1101	N3H-C2=C2H-C2
frg_1102	N3H-C2-C2-C3H2
frg_1103	C3H2-C2=C2-C2
frg_1104	N2=C2-C2H=C2
frg_1105	C2=C2H-C2-C2
frg_1106	C2H-C2-C2=C2
frg_1107	C3H3-C2-C2-C2H
frg_1108	N2=C2-C2=C2
frg_1109	N2=C2-C2-C3H3
frg_1110	C2-N2=C2-C2
frg_1111	C3H2-C3H2-C2=C2
frg_1112	C3H3-C2=C2-C3H2
frg_1113	S3-C3H-C3H2-C3H2
frg_1114	C3H2-S3-C3H-C3H2
frg_1115	C3H-S3-C3H2-C3H
frg_1116	S3-C3H2-C3H-N3H
frg_1117	S3-C3H-C3H-N3H
frg_1118	S3-C3H-C3H-C3H
frg_1119	C3H2-S3-C3H-C3H
frg_1120	c:c:c-c
frg_1121	cH:cH:c-c
frg_1122	cH:c-c:cH
frg_1123	OH-c:c-c
frg_1124	cH:c-c:c
frg_1125	OH-P3-O-c
frg_1126	O=P3-O-c
frg_1127	N3H2-C2-N3-C3H3
frg_1128	N2H=C2-N3-C3H3
frg_1129	C3H3-N3-C3H2-C3H2
frg_1130	N3H2-C2-N3-C3H2
frg_1131	N2H=C2-N3-C3H2
frg_1132	C3H2-C3H2-N3-C2
frg_1133	C2H-C3H-N3H-C2
frg_1134	N3H-C3H-C2H=C2H
frg_1135	N3-C3H-C2H=C2H
frg_1136	C2H-N3-C3H-C2H
frg_1137	C2H-C3H-N3-C2
frg_1138	C3H-O-C3H-C2H
frg_1139	C3H-O-C3H-C2
frg_1140	C3H3-C3H2-C3H2-C2H
frg_1141	OH-C3H2-C3H2-C3H2
frg_1142	C3H3-C3H2-C3H2-C2
frg_1143	O-C2-C3H2-C3H2
frg_1144	P3-O-C2-C3H2
frg_1145	C3H3-C3H-N3H-C2
frg_1146	C3H-N3H-C2-C3H
frg_1147	N3H-C2-C3H-C3H3
frg_1148	O-C3H-C2-N3H
frg_1149	O-C3H2-C3H2-C3H
frg_1150	N2-O-C3H2-C3H2
frg_1151	C3H2-O-N2=C2
frg_1152	O-N2=C2-N3H2
frg_1153	P3-O-C2-N3H2
frg_1154	N3H2-O-C3H2-C2
frg_1155	OH-C2-C3H2-O
frg_1156	P3-O-C3H2-C3H2
frg_1157	O-C3H2-C3H2-N3H2
frg_1158	N3H-c:n-C3H
frg_1159	N2-C2-c:n
frg_1160	O=C2H-C3H-C3H3
frg_1161	OH-C3H2-C3H-N3H
frg_1162	N3H-C2-C3H-Cl
frg_1163	N3H-C3H-C3H-c
frg_1164	O=C2-C3H-Cl
frg_1165	Cl-C3-[C3^]-[C3^]
frg_1166	Cl-C3-[C3^]-Cl
frg_1167	C3-[C3^]-[C3^]-[C3^]
frg_1168	Cl-[C3^]-[C3^]-C3
frg_1169	[C3^]-[C3^]-[C3^]-[C3^]
frg_1170	Cl-[C3^]-[C3^]-[C3^]
frg_1171	C2-[C3^]-[C3^]-[C3^]
frg_1172	[C3^]-C3-[C3^]-[C3^]
frg_1173	Cl-[C3^]-C3-[C3^]
frg_1174	Cl-[C3^]-[C3^]-Cl
frg_1175	O=C2-[C3^]-[C3^]
frg_1176	[C3^]-C2-[C3^]-[C3^]
frg_1177	Cl-[C3^]-[C3^]-C2
frg_1178	Cl-[C3^]-C2-[C3^]
frg_1179	O=C2-[C3^]-Cl
frg_1180	OH-C2-C3H2-Cl
frg_1181	O=C2-C3H2-Cl
frg_1182	C3-C3H-C3H-C2
frg_1183	OH-C3H2-C3H2-[N3+]
frg_1184	C2H-C2H=C2H-c
frg_1185	cH:c-C2H=C2H
frg_1186	OH-C3H2-C2H=C2H
frg_1187	C3H2-C2H=C2H-c
frg_1188	C2-C3H2-C2-C2
frg_1189	P3-O-C3-O
frg_1190	P3-O-C3-C2
frg_1191	S3H-C3H2-C3H2-N3H
frg_1192	N3H-C3H2-C3H-C3H3
frg_1193	N2=C2-C3-C3H2
frg_1194	C3H2-C3-C2-C3H
frg_1195	C3H3-C3H-C2-C3
frg_1196	C3H-C3H-C2-C3
frg_1197	C3H-N2=C2-C3
frg_1198	N2-C3H-C3H-C3
frg_1199	C3-C3H-C3H-C3
frg_1200	N2=C2-C3-C3H3
frg_1201	C3H3-C3-C2-C3H
frg_1202	N2-C3-C3H-C3H
frg_1203	C3H-C3H-C3-C3
frg_1204	N2=C2-C3-C3H
frg_1205	C3H-C3-C2-C3H
frg_1206	N2-C3H-C3H-C3H2
frg_1207	C3H3-C3-C3-C3H
frg_1208	C3H2-C3-C3-C3H
frg_1209	C3H-C3-C3-C3H
frg_1210	C3H-C3-N2=C2
frg_1211	N2=C2-C3H-C3H3
frg_1212	N2-C3H-C3-N2
frg_1213	N2-C3H-C3-C3H3
frg_1214	N2-C3H-C3-C3
frg_1215	C3-C3H-N2=C2
frg_1216	N2-C3H-C3H-C3H3
frg_1217	N2=C2-C3H2-C2
frg_1218	C3H-C2-C3H2-C2
frg_1219	C3H2-C2-C3H-C3
frg_1220	C3-C2-N2=C2
frg_1221	C3-C2-C3H2-C2
frg_1222	N2-C2-C3-C3H3
frg_1223	N2-C2-C3-C3H2
frg_1224	N2-C2-C3-C3H
frg_1225	N2-C2=C2-C3H3
frg_1226	N2-C2=C2-C2
frg_1227	N2=C2-C3H-C3
frg_1228	N2=C2-C3H-C3H2
frg_1229	C3-C3H-C2-C2
frg_1230	C3-N2=C2-C2
frg_1231	C3H3-C3-C2=C2
frg_1232	C3H2-C3-C2=C2
frg_1233	C3H-C3-C2=C2
frg_1234	C3H3-C2-C2-C3H
frg_1235	C3H3-C2=C2-C3
frg_1236	C3-C3-C3H-C2
frg_1237	C3H3-C3-N2=C2
frg_1238	C3-C3-N2=C2
frg_1239	C3-C2=C2-C2
frg_1240	N2-C3-C3-C3H3
frg_1241	N2-C3-C3-C3H2
frg_1242	N2-C3-C3-C3H
frg_1243	C3H2-C3H-C3-C3
frg_1244	C3-C3-C3H2-C2
frg_1245	C3H-C2=N2-C3
frg_1246	C3H3-C3-C3-C3H3
frg_1247	C3H3-C3-C3-C3H2
frg_1248	N3H2-C2-C3H2-C3
frg_1249	n:c:c-C3H
frg_1250	n:c-N3H-C2H
frg_1251	cH:n:c-C3H
frg_1252	OH-C3H-c:n
frg_1253	n:c-C3H-C3H2
frg_1254	C2H-N3H-c:c
frg_1255	N2-C3H2-C3H-c
frg_1256	C3H-C3H2-N2=C2H
frg_1257	N3H-c:c-C3H
frg_1258	OH-C3H-C3H2-N2
frg_1259	OH-C3H-c:c
frg_1260	N3H-C2H=N2-C3H2
frg_1261	C3H2-C3H-c:c
frg_1262	N2=C2H-N3H-c
frg_1263	C2-C2H=C2H-c
frg_1264	O=C2-O-c
frg_1265	cH:c-O-C2
frg_1266	C2-O-c:c
frg_1267	O-c:c:cH
frg_1268	O-c:c-C2H
frg_1269	C2H=C2H-c:c
frg_1270	C2H-C2-O-c
frg_1271	cH:c:c-C2H
frg_1272	S3-C2-C2H=C2H
frg_1273	cH:c-C3H-C3H3
frg_1274	nH:c:c:cH
frg_1275	nH:c-C2=C2
frg_1276	nH:c-C2-C2
frg_1277	nH:c:cH:c
frg_1278	C2-c:nH:c
frg_1279	cH:c-C2-C2
frg_1280	cH:c:nH:c
frg_1281	C2=C2-c:c
frg_1282	C2-C2-c:c
frg_1283	OH-C2-C2-c
frg_1284	C2=C2-C2-c
frg_1285	C2-c:c-C2
frg_1286	C2=C2-C2=C2
frg_1287	OH-C2=C2-N3H
frg_1288	OH-C2-C2-N3H
frg_1289	N3H-C2-C2-c
frg_1290	C2=C2H-C2=C2
frg_1291	C2H-C2=C2-c
frg_1292	C2-C2=C2-c
frg_1293	cH:c-C3H-C2
frg_1294	OH-C2-C3H-c
frg_1295	O=C2-C3H-c
frg_1296	S3-C3H2-C3H-OH
frg_1297	C3H2-C3H-C2=C2
frg_1298	C3H-C2=C2-C3
frg_1299	C3H2-C2=C2-C3H
frg_1300	C3H2-C2=C2-C3
frg_1301	C3H2-C2=C2-C3H2
frg_1302	C3-C3H-C2=C2
frg_1303	O-c:cH:c
frg_1304	cH:c-C2H=C2H2
frg_1305	C3H2-C2-C2H=C2
frg_1306	C3-C2=C2H-C2
frg_1307	OH-c:c-C3H3
frg_1308	cH:cH:c-C3H3
frg_1309	OH-C3H-N3H-C2
frg_1310	C3H3-C2-C3H-C3H
frg_1311	P3-C3H2-C3H2-N3H2
frg_1312	OH-P3-C3H2-C3H2
frg_1313	O=P3-C3H2-C3H2
frg_1314	c-O-C2-c
frg_1315	O-C2-c:cH
frg_1316	C3H3-c:cH:c
frg_1317	C3H2-C2-C2-C3H
frg_1318	OH-C2-C2-C3H3
frg_1319	C2=C2-C3H2-C2
frg_1320	O-C3H-O-c
frg_1321	cH:c-O-C3H
frg_1322	C3H-C3H-O-c
frg_1323	N3H-C3H-C3H-C3H3
frg_1324	P3-O-C3H-C3H3
frg_1325	S3H-C3H2-C3H2-C3H2
frg_1326	S3-C3H2-C3H2-C3H2
frg_1327	S3-S3-C3H2-C3H2
frg_1328	C3H2-S3-S3-C3H2
frg_1329	S3-C3H2-C3H2-S3
frg_1330	OH-S3-C3H2-C3H2
frg_1331	O=S3-C3H2-C3H2
frg_1332	O-C3H-C3H-C3H3
frg_1333	C3H3-C3H-O-C2
frg_1334	C3H-O-C2-C3H
frg_1335	O-C2-C3H-N3H2
frg_1336	O-C2-C3H-C3H2
frg_1337	N3H-C2H=C2-C3H
frg_1338	C3H-C2-N3H-c
frg_1339	O-C3H-C2=C2H
frg_1340	C2=C2H-N3H-c
frg_1341	O-c:c-N3H
frg_1342	N3H-C2H=C2-N3H
frg_1343	C2H=C2-N3H-c
frg_1344	n:c:c:c
frg_1345	N3H-c:n:c
frg_1346	O-c:n:c
frg_1347	n:c-O-C2
frg_1348	C3H-C2-O-c
frg_1349	N3-C2-C3H-C3H
frg_1350	C3H-C2-N3-c
frg_1351	C3H3-N3-C2-C3H
frg_1352	O-C3H-C2-N3
frg_1353	C2-N3-c:c
frg_1354	C2H=C2-N3-c
frg_1355	C3H3-N3-C2=C2H
frg_1356	N3H-c:c-N3
frg_1357	N3H-C2H=C2-N3
frg_1358	C3H3-N3-c:c
frg_1359	N3-c:c:n
frg_1360	O-c:c-N3
frg_1361	O=C2-C2-c
frg_1362	C3H3-C3H2-C2-C3H3
frg_1363	C3H3-C3H2-C2=C2H
frg_1364	C3H-C3H2-C2-C2H
frg_1365	OH-C2=C2H-C2
frg_1366	OH-C3H-C3H-c
frg_1367	C3H-C3H-c:c
frg_1368	C3H-C2H=C2H-c
frg_1369	C2H-C3H-C3H-c
frg_1370	C3H-c:c-C2H
frg_1371	cH:c:c-C3H
frg_1372	O=C2H-C3H2-N3H2
frg_1373	N3H2-C3H2-C3H-N3H2
frg_1374	N3H2-C3H2-C3H-C2
frg_1375	C3H3-C2-O-c
frg_1376	cH:c-C2-C3H3
frg_1377	cH:c-C2=C2H
frg_1378	C2-C2H=C2-c
frg_1379	O-C2-C2H=C2
frg_1380	O-c:c-C2
frg_1381	C3H3-C2-c:c
frg_1382	C2H=C2-c:c
frg_1383	C3H3-C2-C2H=C2
frg_1384	O-C2-C2=C2
frg_1385	C2H-C2=C2-C2H
frg_1386	C2-O-C2-C2
frg_1387	OH-C2-O-C2
frg_1388	O-C2-C2-C2H
frg_1389	C2H-C2-C2H=C2
frg_1390	C2H=C2H-C2-C2H
frg_1391	C3H2-N3H-C3H2-C3H2
frg_1392	O-P3-O-[P3+]
frg_1393	P3-O-[P3+]-OH
frg_1394	P3-O-[P3+]-O
frg_1395	OH-P3-O-[P3+]
frg_1396	O=P3-O-[P3+]
frg_1397	O-[P3+]-O-C3H
frg_1398	O-C3H-O-[P3+]
frg_1399	C3H-C3H-O-[P3+]
frg_1400	OH-[P3+]-O-C3H
frg_1401	OH-C2-C1#C1
frg_1402	C2-C1#C1-C2
frg_1403	O=C2-C1#C1
frg_1404	C2H=C2-C2H=C2
frg_1405	OH-C3H2-C2H=C2
frg_1406	C3H3-C2-C3H2-C3H
frg_1407	C3H2-S3-C2-c
frg_1408	S3-C2-c:cH
frg_1409	C3H3-C3H2-C3H2-C3H
frg_1410	C3H2-C3H-N3H-C3H
frg_1411	C3H3-C3H-N3H-C3H
frg_1412	C3H-N3H-C3H-C2
frg_1413	S3-C2-C3H2-c
frg_1414	C3H3-C3H2-C2=C2
frg_1415	C3H3-C3H-C2=C2
frg_1416	S3-C3H-C2=C2
frg_1417	N3H-C3H-C2=C2
frg_1418	C2H-C3H-C2=C2
frg_1419	C3H-C2=C2-C2
frg_1420	N3H-C3H-C2-C3H
frg_1421	N3H-C3H-C2H=C2
frg_1422	C3H3-C3H-C2-C3H
frg_1423	S3-C3H-C2-C3H
frg_1424	N3H-C2=C2H-C3H
frg_1425	C3H-N3H-C2=C2H
frg_1426	C3H-C2-C3H-C2H
frg_1427	C3H2-C2-C2-C2H
frg_1428	C2H=C2-N2=C2
frg_1429	N2-C2-C2-C3H3
frg_1430	N2-C2=C2H-c
frg_1431	N2=C2-C2-C3H2
frg_1432	C3H-c:c:c
frg_1433	nH:c:c-C3H
frg_1434	C3H3-C3H-c:c
frg_1435	S3-C3H-c:c
frg_1436	C3H2-S3-C3H-c
frg_1437	C3H3-c:c-C3H
frg_1438	C3H3-C3H-S3-C3H2
frg_1439	C3H3-N3H-C2-C3H
frg_1440	N3H2-C3H-C2-N3H
frg_1441	O=C2-N3H-C3H3
frg_1442	C3H2-S3-C3H-C2
frg_1443	N3H-C2-C2-C3H
frg_1444	S3-C3H-C2-C2
frg_1445	C3H-C2-C2=C2H
frg_1446	C2H-C3H-N2=C2
frg_1447	N2-C3H-C2-C3H
frg_1448	N2-C3H-C2=C2
frg_1449	N2-C3H-C2H=C2
frg_1450	C3H3-C2=C2-C3H
frg_1451	N3H2-C2-C3H2-c
frg_1452	C2-C3H2-c:[c.]
frg_1453	cH:cH:cH:[c.]
frg_1454	O=N_Pl3-C3H-C3H3
frg_1455	O=C2H-N3H-c
frg_1456	cH:c-N3H-C2H
frg_1457	N3H-c:c-C2H
frg_1458	O=C2H-c:c
frg_1459	O-N3H-C2-C3H
frg_1460	N3H-O-C3H2-C3H
frg_1461	C3H2-O-N3H-C2
frg_1462	O=C2-N3H-O
frg_1463	OH-N3H-C3H2-C3H2
frg_1464	C3H-C2H=C2-C3
frg_1465	C3H3-N3-C2-C3H2
frg_1466	O=C2-N3-C3H3
frg_1467	C3H3-N3-C3H-c
frg_1468	N3-C2-C3H2-C3H2
frg_1469	N3-C3H-c:cH
frg_1470	N3-C3H-C3H2-C3H2
frg_1471	n:cH:c-C3H
frg_1472	C3H2-C2-N3-C3H
frg_1473	cH:c-C3H-C3H2
frg_1474	C3H2-C3H2-C3H-c
frg_1475	C2-N3-C3H-c
frg_1476	O=N3-C3H-C3H2
frg_1477	O=N3-C3H-c
frg_1478	O=N3-C3H2-C3H2
frg_1479	C3H2-N3-C3H-c
frg_1480	C3H-c:cH:[n+]
frg_1481	cH:[n+]:cH:c
frg_1482	C3H-[n+]:cH:c
frg_1483	cH:cH:cH:[n+]
frg_1484	cH:c:cH:[n+]
frg_1485	cH:cH:[n+]:cH
frg_1486	cH:cH:[n+]-C3H
frg_1487	O-C3H-[n+]:cH
frg_1488	cH:[n+]-C3H-C3H
frg_1489	C3H-C3H-C3H-[n+]
frg_1490	OH-C3H-C3H-[n+]
frg_1491	C3H-O-C3H-[n+]
frg_1492	C3H2-C3H2-N3H-C3H
frg_1493	C3H2-N3H-C3H-C3H2
frg_1494	C3H2-N3H-C3H-c
frg_1495	N3H-C3H-c:cH
frg_1496	C2-N3H-C3H-c
frg_1497	N3-C2-C3H-C3H2
frg_1498	OH-C3H-C2-N3
frg_1499	C3H-N3-C2-C3H
frg_1500	C3H-C3H2-C3H-c
frg_1501	C3H3-N3-C3-C3H2
frg_1502	OH-C3-N3-C3H3
frg_1503	C3H3-N3-C3-c
frg_1504	N3-C3-c:cH
frg_1505	N3-C3-C3H2-C3H2
frg_1506	C3H2-C3-N3-C2
frg_1507	OH-C3-N3-C2
frg_1508	C2-N3-C3-c
frg_1509	O=C2-N3-C3
frg_1510	OH-C3-C3H2-C3H2
frg_1511	C3H2-C3H2-C3-c
frg_1512	C3H2-C2-N3-C3
frg_1513	cH:c-C3-C3H2
frg_1514	n:cH:c-C3
frg_1515	cH:cH:c-C3
frg_1516	OH-C3-c:cH
frg_1517	Cl-C2-C2H=C2H
frg_1518	Cl-C2=C2H-C2
frg_1519	C3H2-C2H=C2-C3H
frg_1520	C3H2-C3H-C3H2-C2H
frg_1521	C3-C3H-C3H2-C2H
frg_1522	S3H-C3H-C3H2-C3H2
frg_1523	S3H-C3H2-C3H2-C3H
frg_1524	C2H=C2H-C2-c
frg_1525	cH:c-C2-C2H
frg_1526	C2H-C2-c:c
frg_1527	N3H-c:cH:c
frg_1528	N3-c:c:cH
frg_1529	cH:c-N3H-C3H
frg_1530	C3H2-N3-c:c
frg_1531	N3H-C3H-C2=N2
frg_1532	N3H-C3H-C2-N3
frg_1533	C3H2-N3-C2-C3H
frg_1534	C3H-N3H-c:c
frg_1535	N2-C2-N3H-C2
frg_1536	N2=C2-C3H-C2
frg_1537	N3-C2-C3H-C2
frg_1538	N3H-C2-N2=C2
frg_1539	N3H-C2-C3H-C2
frg_1540	N2=C2-N3-C3H2
frg_1541	N2=C2-N3-c
frg_1542	cH:c-N3-C2
frg_1543	C3H-C3H2-N3-C2
frg_1544	N3-c:cH:c
frg_1545	OH-C3H-C3H2-N3
frg_1546	N3-C3H2-C3H-C3H
frg_1547	C3H3-[n+]:cH:c
frg_1548	cH:cH:[n+]-C3H3
frg_1549	C3H3-[N_Pl3+]-C3H-C3H2
frg_1550	C3H3-[N_Pl3+]-C3H-c
frg_1551	C3H3-[N_Pl3+]=C2H-C3H2
frg_1552	cH:c-C3H-[N_Pl3+]
frg_1553	C3H2-C3H2-C3H-[N_Pl3+]
frg_1554	C3H2-C3H2-C2H=[N_Pl3+]
frg_1555	C2H=[N_Pl3+]-C3H-c
frg_1556	C3H2-C2H=[N_Pl3+]-C3H
frg_1557	C3H2-C3H2-C3H2-C3
frg_1558	C3H2-N3-C3-C3H2
frg_1559	OH-C3-N3-C3H2
frg_1560	C3H2-N3-C3-c
frg_1561	C3H2-C3H2-N3-C3
frg_1562	OH-C3H2-N3-C3H
frg_1563	OH-C3H2-N3-C2
frg_1564	C3H2-N3-C2-C3H2
frg_1565	O=C2-N3-C3H2
frg_1566	C3H3-N3H-C3H2-C3H2
frg_1567	C3H2-C3H2-C2-c
frg_1568	n:cH:c-C2
frg_1569	C3H3-N3H-C2-C3H2
frg_1570	OH-C2-C3H2-C2H
frg_1571	C2H=C2H-C3H2-C2
frg_1572	n:cH:c-C2H
frg_1573	C3H3-C3H-C2-c
frg_1574	C3H3-C3H-N3H-C3
frg_1575	cH:c-C2-C3H
frg_1576	C3H3-C3-N3H-C3H
frg_1577	N3H-C3H-C2-c
frg_1578	C3-N3H-C3H-C2
frg_1579	C3H3-C3H-C3H-c
frg_1580	C3H-C3H-N3H-C3
frg_1581	C3H-c:cH:c
frg_1582	C3H2-C3-N3H-C3H
frg_1583	OH-C3H2-C3-N3H
frg_1584	OH-C2-C3H2-N3H
frg_1585	C3H2-N3H-C2-c
frg_1586	OH-C3H2-C3H2-C3
frg_1587	C3H2-C3H2-C3-C3H2
frg_1588	C3H2-c:c-C3H
frg_1589	C3H-C3H2-C3H2-c
frg_1590	C3H-C3H-C3H-c
frg_1591	N2=C2-C2-C3H
frg_1592	C2-c:cH:[n+]
frg_1593	N3H2-C2-c:cH
frg_1594	C3H3-[S3+]-C3H2-C3H2
frg_1595	C3H-C3H2-C3H2-[S3+]
frg_1596	C3H-C3H-C2=C2
frg_1597	S3H-C2-C3H-C3H
frg_1598	S3H-C2-C3H-O
frg_1599	O-C3H-C2=C2
frg_1600	S3H-C2=C2-C3H
frg_1601	C3H-C2=C2-C3H
frg_1602	S3H-C2-C3H-C3H2
frg_1603	S3H-C2=C2-S3H
frg_1604	S3H-C2-C3H-N3H
frg_1605	C3H2-C2=C2H-[C3^H]
frg_1606	C2=C2H-[C3^H]-[C3^H]
frg_1607	C2=C2H-[C3^H]-[C3^]
frg_1608	C3H3-C2=C2H-[C3^H]
frg_1609	C2H-[C3^H]-[C3^]-[C3^H]
frg_1610	C3H3-[C3^]-[C3^H]-C2H
frg_1611	C3H2-[C3^]-[C3^H]-C2H
frg_1612	C3H2-[C3^H]-[C3^H]-C2H
frg_1613	C2H-[C3^H]-[C3^H]-[C3^]
frg_1614	C3H2-C3H2-[C3^]-[C3^H]
frg_1615	C3H2-[C3^H]-[C3^]-[C3^H]
frg_1616	C3H3-[C3^]-[C3^H]-[C3^H]
frg_1617	C3H2-[C3^]-[C3^H]-[C3^H]
frg_1618	O-C3H2-[C3^H]-[C3^H]
frg_1619	P3-O-C3H2-[C3^H]
frg_1620	C3H3-[C3^]-[C3^H]-C3H2
frg_1621	C3H2-[C3^H]-[C3^]-C3H2
frg_1622	C3H2-[C3^H]-[C3^H]-[C3^]
frg_1623	O-C3H2-[C3^H]-[C3^]
frg_1624	C2H-C3H2-C3H2-[C3^]
frg_1625	C3H3-[C3^]-C3H2-C3H2
frg_1626	N3H2-C3H2-C3H2-C3H
frg_1627	OH-C3H-C2-c
frg_1628	C3H-C2-c:c
frg_1629	C3H-O-c:c
frg_1630	C3H-C3H-C2-c
frg_1631	O-C3H-c:cH
frg_1632	c-O-C3H-c
frg_1633	C2-C3H-C3H-c
frg_1634	C2-C3H2-C2-c
frg_1635	P3-O-N3-C3H3
frg_1636	OH-P3-O-N3
frg_1637	O=P3-O-N3
frg_1638	O-P3-O-N3
frg_1639	O-C3H2-C3H2-C3
frg_1640	cH:c-C2=C2
frg_1641	OH-C2=C2-c
frg_1642	C2-O-C2-c
frg_1643	O-C2-C2-C2
frg_1644	C2H=C2-C2-C2
frg_1645	C2=C2-O-C2
frg_1646	C3H2-C3H-O-C3
frg_1647	O-C3-C3H-C3H
frg_1648	C3H-O-C3-C3H
frg_1649	nH:c:cH:n
frg_1650	nH:cH:n:cH
frg_1651	cH:nH:c:cH
frg_1652	N3H2-c:nH:cH
frg_1653	S3-O-C3H2-C3H2
frg_1654	OH-S3-O-C3H2
frg_1655	O=S3-O-C3H2
frg_1656	C3H-C3H2-S3-C2H
frg_1657	O=C2H-S3-C3H2
frg_1658	S3-N3H-C3H-C3H
frg_1659	OH-S3-N3H-C3H
frg_1660	O=S3-N3H-C3H
frg_1661	OH-P3-C3H2-C2H
frg_1662	P3-C3H2-C2H=O
frg_1663	O=P3-C3H2-C2H
frg_1664	S3-S3-S3-OH
frg_1665	S3-S3-S3=O
frg_1666	N3H-C2=N2-C3H2
frg_1667	N2=C2-N3H-C3H
frg_1668	C3H3-C2-N3H-C3H2
frg_1669	N2=C2-N3-C3H3
frg_1670	N3-C2=N2-C3H2
frg_1671	N3H2-C2-N3H-C3H2
frg_1672	C3H2-C2-N3H-C2
frg_1673	O=C2-C3H2-N2
frg_1674	C2H=N2-C3H2-C2
frg_1675	C3H2-C2-N3H-C2H
frg_1676	N3H-C2-C3H2-N2
frg_1677	N2-c:c:cH
frg_1678	cH:c-N3H-C2
frg_1679	C2=N2-c:c
frg_1680	C2-C2-N3H-c
frg_1681	N3H-C2-C2-C2
frg_1682	N3H-C2-C2=N2
frg_1683	N3H-c:c-N2
frg_1684	C2-C2=N2-c
frg_1685	cH:c-N2=C2
frg_1686	N2-c:cH:c
frg_1687	O-C3H2-C3H-C3H2
frg_1688	cH:c-C3H2-[n+]
frg_1689	cH:[n+]-C3H2-c
frg_1690	c:[n+]-C3H2-c
frg_1691	C3H2-[n+]:c:c
frg_1692	C3H3-c:[n+]-C3H2
frg_1693	s:cH:[n+]-C3H2
frg_1694	s:c:c:[n+]
frg_1695	C3H2-c:c:[n+]
frg_1696	c:s:cH:[n+]
frg_1697	c:c-C3H2-[n+]
frg_1698	cH:s:c-C3H2
frg_1699	cH:s:c:c
frg_1700	cH:[n+]:c:c
frg_1701	cH:[n+]:c-C3H3
frg_1702	s:c:c-C3H3
frg_1703	s:c-C3H2-C3H2
frg_1704	s:cH:[n+]:c
frg_1705	O-C3H2-C3H2-c
frg_1706	C2H-C3H2-C2-c
frg_1707	O-P3-O-C2
frg_1708	P3-O-C2-c
frg_1709	O-C2-c:c
frg_1710	C2-C3H2-c:c
frg_1711	N2-C2=C2-c
frg_1712	C3-C2=C2-c
frg_1713	nH:c-C2-C3H3
frg_1714	C3H2-C3H-C2-C2H
frg_1715	C3-C3H-C2-C2H
frg_1716	N3H-C2-C3-C3H
frg_1717	N3H-C2-C3-C3H3
frg_1718	N3H-C2-C3-C3H2
frg_1719	C3-C2-N3H-C2
frg_1720	C3H-C2=C2H-c
frg_1721	C3-c:nH:c
frg_1722	C3-c:c:c
frg_1723	C3H3-C3-c:c
frg_1724	OH-C3-c:c
frg_1725	C3-C3-c:c
frg_1726	C3H2-c:c-C3
frg_1727	O-C3-C3-c
frg_1728	C3-C3-C3-c
frg_1729	N2-C3-C3-c
frg_1730	nH:c-C3-C3H3
frg_1731	OH-C3-c:nH
frg_1732	nH:c-C3-C3
frg_1733	C3H2-C3-C3-C3
frg_1734	C3H3-C3-C3-C3
frg_1735	C3H-C3-C3-C3
frg_1736	C3-C3-O-C2
frg_1737	O-C3-C3-C3H3
frg_1738	OH-C3-C3-O
frg_1739	OH-C3-C3-C3
frg_1740	OH-C3-C3-N2
frg_1741	C3-N2=C2-C2H
frg_1742	C3H2-C2-O-C3
frg_1743	O-C2-C3H2-C3
frg_1744	O-C3-N2=C2
frg_1745	O-C3-C3-C3H2
frg_1746	O-C3-C3-C3H
frg_1747	N2-C3-O-C2
frg_1748	N3H2-C3H-C3H-C3H2
frg_1749	nH:c-C3H2-C2
frg_1750	N2-C2-C3H2-c
frg_1751	C2=C2-C3H2-c
frg_1752	C3H2-C2-N2=C2
frg_1753	C2=C2-C3-C2
frg_1754	C3-C2=N2-C2
frg_1755	N2=C2-C3-C2
frg_1756	N2-C2=C2-C3
frg_1757	N2-C2=C2-C3H2
frg_1758	C3H2-C2-C3-C2
frg_1759	C3H-C2=C2H-C2
frg_1760	C3-N3H-C2=C2H
frg_1761	C3H3-C3-C2-C2H
frg_1762	C3H2-C3-C2-C2H
frg_1763	C2H-C2-C3-C2
frg_1764	C2-N3H-C3-C2
frg_1765	C3-C3-N3H-C2
frg_1766	C3-C2-C2H=C2
frg_1767	N3H-C3-C3-C3H3
frg_1768	N3H-C3-C3-C3H2
frg_1769	N3H-C3-C3-C3H
frg_1770	N3H-C3-C2-N2
frg_1771	N3H-C3-C2=C2
frg_1772	N3H-C3-C2-C3H3
frg_1773	O=C2-C3-N3H
frg_1774	C3-C2=C2-C3
frg_1775	C3H-C2-N3H-C3
frg_1776	C3H3-C3-C3-C2
frg_1777	C3H2-C3-C3-C2
frg_1778	C3H-C3-C3-C2
frg_1779	N2-C2-C3-C2
frg_1780	C3H3-C2-C3-C3
frg_1781	O=C2-C3-C3
frg_1782	N2=C2-C3H2-c
frg_1783	N2-C2-C3-C3
frg_1784	C3-C2-C3H2-c
frg_1785	C3-C3-C2=C2
frg_1786	C2-C3H-C2-C2
frg_1787	N2-C2-C3H2-C3
frg_1788	N2-C3-C3H2-C2
frg_1789	C3H2-C3-N2=C2
frg_1790	C3H2-C2=N2-C3
frg_1791	C3-C3H2-C2=C2
frg_1792	N2-C3-C2=C2
frg_1793	N2-C3-C2-C3H2
frg_1794	C2=N2-C3-C2
frg_1795	C3H2-C2-C2-C3H2
frg_1796	C3H2-C2-C2=C2
frg_1797	O=C2H-C3H2-C3H3
frg_1798	N2H=C2H-N3-C3H
frg_1799	N2H=C2H-N3-C2
frg_1800	C3H3-C3-N3H-C2
frg_1801	N3H-C3-C2-N3H
frg_1802	N3H-C2-C3-C2
frg_1803	N3H-C2=C2-C3
frg_1804	N3H-C2=C2-C3H2
frg_1805	N3H-C2-C3-C3
frg_1806	C2H=C2-C3-C2
frg_1807	C3H-C3-N3H-C2
frg_1808	N3H-C3H-C3-N3H
frg_1809	N3H-C3-C3H-C3H
frg_1810	C3-C3H-N3H-C2
frg_1811	N3H-C3H-C3-C3H3
frg_1812	C3H-N3H-C2-C3
frg_1813	N3H-C3H-C3H-C3
frg_1814	N3H-C3H-C3-C3
frg_1815	OH-C2-[C3^]-N3H2
frg_1816	O=C2-[C3^]-N3H2
frg_1817	N3H2-[C3^]-[C3^H2]-[C3^H2]
frg_1818	C2-[C3^]-[C3^H2]-[C3^H2]
frg_1819	OH-C2-[C3^]-[C3^H2]
frg_1820	O=C2-[C3^]-[C3^H2]
frg_1821	C3-C2-C2=C2
frg_1822	C2H2=C2-C2=C2
frg_1823	C3H2-C3-N3H-C2
frg_1824	C3-C2-C3H-C2
frg_1825	N3H-C3-C2=C2H2
frg_1826	N3H-C3-C2-C2
frg_1827	N3H-C3-C3H2-C2
frg_1828	C3H2-C2-C2-C3
frg_1829	N2=C2-C3H2-C3
frg_1830	C3H-C2-C3H2-C3
frg_1831	C3-N3H-C2=C2
frg_1832	C3H3-C3-C2=C2H2
frg_1833	C3H2-C3-C2=C2H2
frg_1834	C2=C2-C3H-C2
frg_1835	C3H2-C2-C2=C2H2
frg_1836	C2H-C3H-C3H2-C2
frg_1837	C3H-O-C2-C2H
frg_1838	C2-O-C3-C2
frg_1839	C2H=C2H-C3-C2
frg_1840	OH-C2-C3-C2H
frg_1841	O=C2-C3-C2H
frg_1842	P3-C3H2-C2-OH
frg_1843	OH-P3-C3H2-C2
frg_1844	O=P3-C3H2-C2
frg_1845	P3-C3H2-C2=O
frg_1846	OH-C2H=C2-C3H2
frg_1847	OH-C2H=C2-C2H
frg_1848	OH-C2=C2-C3H2
frg_1849	OH-C2=C2-C2H
frg_1850	C2H=C2H-C3H-C2
frg_1851	C3H2-C2H=C2H-C2H
frg_1852	OH-C3H-C3H2-c
frg_1853	C3H-C3H-C3H2-c
frg_1854	P3-O-C3-N3H
frg_1855	P3-O-C3-C2H
frg_1856	O=C2H-C3-O
frg_1857	O-C3-N3H-C3H
frg_1858	O-C3-C3H2-C3H2
frg_1859	C3H2-C3H-N3H-C3
frg_1860	C3-N3H-C3H-C2H
frg_1861	O=C2H-C3-C3H2
frg_1862	N3H-C3-C3H2-C3H2
frg_1863	C3H2-C3H2-C3-C2H
frg_1864	O=C2H-C3H-N3H
frg_1865	O=C2H-C3-N3H
frg_1866	C3H-N3H-C3-C2H
frg_1867	O=C2H-C3H-C3H2
frg_1868	C3H3-[N3+]-C3H-C3H2
frg_1869	C3H3-[N3+]-C3H-C2
frg_1870	OH-C2-C3H-[N3+]
frg_1871	O=C2-C3H-[N3+]
frg_1872	C3H2-C3H2-C3H-[N3+]
frg_1873	C3H2-C3H-[N3+]-C3H2
frg_1874	C3H2-[N3+]-C3H-C2
frg_1875	C3H2-C3H2-[N3+]-C3H
frg_1876	C3H3-N3-C3H-C2
frg_1877	OH-C2-C3H-N3
frg_1878	C3H2-N3-C3H-C2
frg_1879	O-C3H2-C2-C2
frg_1880	OH-C2H=C2-C2
frg_1881	OH-C2H=C2-OH
frg_1882	Hg-c:cH:cH
frg_1883	o:[c.]:cH:cH
frg_1884	cH:[c.]:[c.]:[c.]
frg_1885	o:[c.]:[c.]:cH
frg_1886	o:[c.]:[c.]:[c.]
frg_1887	[c.]:o:[c.]:[c.]
frg_1888	cH:[c.]:o:[c.]
frg_1889	[c.]:[c.]:[c.]:[c.]
frg_1890	cH:c:c-c
frg_1891	c:c-c:c
frg_1892	C2H-C2H=C2-c
frg_1893	C3H2-C3H-S3-C2
frg_1894	O=C2-S3-C3H
frg_1895	C3H2-C2-S3-C3H
frg_1896	C3H2-C2=C2-C2H
frg_1897	C3-C2-C2H=C2H
frg_1898	C2H-C2H=C2-C2H
frg_1899	C3H3-C2=C2H-C2H
frg_1900	O-C2=C2-O
frg_1901	O-C2=C2-c
frg_1902	S3-S3-C3H2-C3H
frg_1903	C2-C3-O-c
frg_1904	C3-C2H=C2H-c
frg_1905	cH:c-O-C3
frg_1906	C3-O-c:c
frg_1907	OH-C3-C2H=C2H
frg_1908	OH-C3-O-c
frg_1909	C2H-C3-O-c
frg_1910	OH-c:c-C2H
frg_1911	C3H3-N3-C3H2-C2
frg_1912	OH-C2-C3H2-N3
frg_1913	O=C2-C3H2-N3
frg_1914	C2-N3-C3H2-C2
frg_1915	P3-N2=C2-N3
frg_1916	OH-P3-N2=C2
frg_1917	O=P3-N2=C2
frg_1918	P3-N2=C2-N3H2
frg_1919	N3-C3H2-C2-N2
frg_1920	C2H=C2H-C3H2-[N3+]
frg_1921	C3H3-C2H=C2H-C2
frg_1922	S3H-C3H2-C3H-N3H2
frg_1923	N2=C2H-C2H=C2
frg_1924	N3H-C2-N2=C2H
frg_1925	N3H-C2=C2H-C2H
frg_1926	C2H-C2H=N2-C2
frg_1927	O=C2-N2=C2H
frg_1928	S3H-C3H2-C3H2-S3
frg_1929	O-C2-C3H-C3H
frg_1930	OH-C3H-C2-O
frg_1931	OH-C3H-c:nH
frg_1932	nH:c-C3H-C3H
frg_1933	cH:nH:c-C3H
frg_1934	C3H2-N3H-C3H-C2
frg_1935	OH-C3H2-C3H-N3H2
frg_1936	C3H2-C3H-n:[c.]
frg_1937	cH:n-C3H-C3H2
frg_1938	n-C3H-C3H2-C3H
frg_1939	OH-C3-C3H2-C3H
frg_1940	C3H2-C3-C3H2-C3H
frg_1941	N2=C2-C3H2-C3H2
frg_1942	C2H=C2-C3H2-C2H
frg_1943	C2H-C3H2-C2-C2
frg_1944	C3H2-C2-C2-c
frg_1945	C2=C2H-C2-c
frg_1946	C2H=C2-C2-c
frg_1947	C3H2-C3H-n:c
frg_1948	C2H=N2-C2-c
frg_1949	N3H-C2H=N2-C2
frg_1950	C3H3-C2-C2-C3H3
frg_1951	N3H2-C2-C2-N2
frg_1952	N3H2-C3H-C3H-N3H2
frg_1953	OH-C2-O-c
frg_1954	O-C2=C2-C3H2
frg_1955	C2=C2-O-c
frg_1956	C3H2-C2-O-c
frg_1957	O-c:c-C3H2
frg_1958	O-C3H2-C2=N2
frg_1959	nH:c-C3H2-C3H
frg_1960	N2-C3H-C3H2-c
frg_1961	C3-C3H-C3H2-c
frg_1962	C3H-C3H2-c:c
frg_1963	N2-C3H-C3-C3H
frg_1964	N2-C3H-C3-C3H2
frg_1965	C3H3-C2-C3H-C3H2
frg_1966	C2-c:c:[c.]
frg_1967	cH:[c.]:c:c
frg_1968	c:c:[c.]:[c.]
frg_1969	c:cH:c:[c.]
frg_1970	cH:c:c:[c.]
frg_1971	c:[c.]:[c.]:c
frg_1972	OH-c:[c.]:cH
frg_1973	OH-c:[c.]:[c.]
frg_1974	N3-C2=C2-C3H3
frg_1975	C3H3-C2=C2-C3H3
frg_1976	C3H3-C2-N2=C2
frg_1977	C2=C2-N3-C2
frg_1978	C3H2-N3-C2=C2
frg_1979	N3-C2-C2=N2
frg_1980	C3H2-N3-C2-C2
frg_1981	C2-N3-C2-C2
frg_1982	N3-C2-C2-C2
frg_1983	N2=C2-N3-C2
frg_1984	C3H3-C2-N3-C2
frg_1985	C3H3-C2-N3-C3H2
frg_1986	nH:[c.]:cH:c
frg_1987	N3H2-C3H2-C3H2-c
frg_1988	C2H-C2-C2-C2H
frg_1989	P3-O-C2-C3H
frg_1990	N3-C2H=C2-C3H3
frg_1991	N3H-C2-C2=C2H
frg_1992	O-C3H-C2-C3H
frg_1993	C3H3-C2=N2-C3H2
frg_1994	N2-C3H2-C3H2-C3H
frg_1995	cH:c-C2H=C2
frg_1996	OH-C2=C2H-c
frg_1997	O-C2-C3H-N3H
frg_1998	O-C3H2-C3H-N3H
[truncated: 68,892 more rows]

## Sheet: 2_Atom Fragments Vectors
Vectors for fragments with 2 heavy atoms
Total number of fragments = 1604, Vector Length = 100
frg_25	0.208642	0.136658	-0.017151	-0.25458	-0.169189	0.066226	-0.004735	0.01864	-0.15671	0.251777	-0.058094	-0.113558	-0.012614	0.101793	-0.130796	-0.049204	0.038706	-0.323149	-0.278059	0.032412	0.073127	-0.056265	0.211821	0.212865	0.22519	-0.203059	-0.167921	0.19388	-0.195378	0.076482	0.131507	0.065521	0.119677	0.22426	-0.017715	0.05554	-0.345551	0.166071	-0.074886	-0.132297	-0.209058	-0.05883	0.282851	0.11065	-0.155515	-0.06753	-0.264271	0.164737	-0.102532
frg_27	0.099037	0.238013	-0.116675	-0.088801	-0.033067	0.137898	-0.03125	0.076757	-0.268781	0.352422	-0.17881	0.078826	-0.069342	0.093856	-0.106762	-0.023982	0.051819	-0.279726	-0.246727	0.171684	0.0162	-0.079333	0.120588	0.157573	0.196964	-0.259636	-0.221245	0.301787	-0.121761	0.246319	0.256396	0.051828	0.208564	0.105376	0.05693	0.09399	-0.218617	0.045744	0.114008	0.003032	-0.097676	-0.045781	0.027106	-0.039307	-0.11607	0.014346	-0.01096	0.238885	-0.130735
frg_2	0.383329	-0.072019	-0.197066	0.090575	-0.097181	-0.391797	0.080172	0.027439	-0.090747	0.114028	-0.008855	-0.236852	0.088002	-0.095456	0.217965	0.040912	-0.298921	0.199805	-0.128499	0.212397	-0.047977	-0.036322	-0.008171	0.00548	0.434247	-0.319927	0.334383	0.097407	0.133311	-0.192339	-0.053737	-0.038045	-0.055221	-0.020748	0.075215	-0.237477	-0.145088	-0.079261	0.048106	-0.149521	-0.318379	0.121941	0.023162	-0.05739	-0.268523	0.131946	-0.288745	0.306707	0.222182
frg_26	0.267547	0.328979	0.198517	-0.0464	-0.290066	-0.045073	-0.337315	0.064579	0.03284	0.345934	0.293927	-0.251779	0.004742	-0.044983	-0.011704	-0.065726	0.115181	0.03938	0.131059	-0.25386	0.009258	-0.23837	-0.086202	0.16133	0.117501	-0.356771	-0.170027	0.353541	-0.315765	0.086664	0.101987	0.114146	-0.183531	0.278774	-0.049322	0.10254	-0.312436	0.15546	-0.089389	0.031512	-0.260097	-0.073101	0.432431	0.184609	-0.248925	-0.319186	0.039606	0.002628	-0.004933
frg_53	0.162208	-0.028562	-0.078461	-0.163676	-0.052706	-0.073625	-0.129848	0.471535	-0.38602	0.430163	0.440556	0.071969	-0.136187	-0.386606	0.301591	-0.002074	-0.48941	0.417672	0.127371	0.006754	-0.199733	-0.063872	0.085971	-0.082841	0.165525	0.356537	0.19026	-0.297538	-0.098828	0.073163	0.542631	-0.023644	0.124484	-0.098333	0.180357	-0.383594	-0.215184	0.126309	-0.092647	-0.239834	-0.102032	-0.146139	-0.163383	0.140606	-0.093413	-0.252388	0.103977	0.278617	0.002135
frg_48	0.420593	0.025049	-0.144649	-0.01471	0.221895	0.248467	-0.04894	0.336859	-0.357909	0.452964	0.386015	-0.124864	0.279179	-0.316742	0.043218	-0.034872	-0.395995	0.317934	-0.192773	-0.102263	-0.08611	-0.089389	0.258751	-0.290779	0.328489	0.119272	0.157728	-0.333326	-0.012272	0.303757	0.388852	0.171288	0.031369	0.070912	0.374336	-0.435978	-0.210141	-0.316539	0.453572	-0.033702	0.072077	-0.039856	0.022728	0.154385	0.185502	-0.232293	-0.021154	0.271874	-0.20749
frg_43	0.203629	0.094819	-0.321661	0.131186	-0.250967	-0.16701	0.124489	0.28064	0.196513	0.097166	-0.20158	-0.310664	-0.209453	-0.034492	0.118361	0.016959	-0.155418	0.025234	-0.009232	-0.114582	-0.212053	0.171588	-0.127872	-0.03312	0.051368	-0.321399	-0.059861	0.041322	-0.029011	-0.191637	0.031152	-0.298163	0.049442	-0.130889	0.117204	-0.152163	-0.152919	0.095826	-0.03048	0.366093	-0.18209	-0.075697	0.174646	-0.063796	0.043455	-0.127327	-0.314607	0.127053	0.316064
frg_37	0.136982	-0.037659	0.047814	-0.070422	-0.155413	0.171653	-0.098556	-0.306575	0.349955	0.315987	0.216315	0.250542	-0.165992	-0.107123	0.056456	0.200639	-0.39055	0.043869	-0.134277	-0.130246	-0.226155	0.087678	0.12399	0.082067	0.052871	-0.121513	0.240416	0.251385	-0.019132	0.363134	0.121601	-0.081653	-0.142647	0.339339	0.195987	0.221022	0.033732	0.009967	-0.103077	-0.197238	-0.125586	-0.517884	-0.170662	0.373501	-0.340643	0.108158	0.477667	-0.40615	0.067128
frg_52	-0.227121	0.257806	0.001178	0.14511	0.027567	0.008427	-0.019572	0.386197	-0.100978	0.288509	-0.018774	-0.137765	-0.177458	0.318686	-0.169566	-0.188995	-0.012793	0.043042	-0.02676	0.149262	-0.411699	0.048005	-0.049962	0.094015	-0.149527	-0.313019	0.245148	0.11785	-0.090907	0.087471	-0.078883	-0.21344	0.171692	0.375489	0.14323	0.026039	-0.257428	0.101833	-0.196437	0.056673	-0.046687	-0.163289	0.040713	0.176638	-0.21097	0.162012	-0.198523	0.320795	0.088702
frg_77	0.071931	0.299364	0.599665	-0.018567	-0.65219	-0.121685	0.010745	0.040052	-0.040974	0.038371	-0.154779	-0.362991	0.292186	0.107808	0.222145	-0.106642	-0.110102	-0.191426	-0.195077	-0.088359	0.013275	0.084838	0.084463	-0.12494	-0.017795	0.014822	-0.196334	0.175049	0.047412	0.409922	-0.172274	-0.276726	0.375244	0.387315	0.203096	-0.076068	-0.424979	0.377766	0.097127	-0.171587	-0.305548	-0.055168	0.532952	-0.206539	-0.102356	-0.034294	-0.046127	0.263256	-0.085937
frg_66	0.350131	-0.130599	0.123165	0.192877	0.331453	0.183986	-0.071158	0.067596	-0.403226	-0.031668	-0.161285	-0.157461	0.207583	0.035345	0.144495	-0.205038	-0.092975	0.573634	-0.06492	-0.175211	-0.132325	-0.171771	0.125914	-0.000631	0.209921	-0.326192	0.181413	0.054565	0.131145	-0.119984	-0.035933	0.462768	-0.263855	-0.097682	0.294608	-0.24976	-0.221529	-0.315281	0.143022	0.009455	-0.203692	0.018359	-0.461882	0.032233	0.031199	-0.038583	-0.14663	0.10059	-0.044837
frg_5	0.15788	-0.162819	-0.35135	-0.265364	-0.137282	-0.097722	0.07676	0.308169	-0.497221	0.365729	0.128351	0.332416	0.075227	-0.303066	0.197017	-0.444145	-0.154672	0.125162	-0.076266	0.058238	-0.487962	-0.169789	0.643534	-0.418895	0.208292	-0.022042	0.138651	-0.402682	0.240041	0.380783	0.114668	0.417499	-0.117514	-0.044906	0.173931	-0.342563	-0.246248	-0.119286	-0.126558	-0.118508	-0.185198	0.323361	-0.128088	0.142158	-0.442337	-0.095847	-0.010408	0.168954	-0.050195
frg_61	0.348299	0.016018	-0.165695	0.172375	-0.004964	0.204237	-0.276221	0.041984	-0.221268	0.437311	0.370994	-0.036085	-0.216928	0.031628	-0.149418	-0.118164	-0.466548	-0.099693	0.061839	-0.076672	-0.307498	-0.001719	0.004818	-0.216889	0.020251	0.120967	0.012323	0.020183	0.031275	0.109966	0.417517	-0.308706	-0.17171	0.10803	0.072491	-0.33296	-0.249052	0.279634	-0.168442	-0.211215	-0.183715	-0.094105	-0.033668	-0.061555	-0.115825	0.000387	0.409145	0.320608	0.16147
frg_102	-0.245722	0.23508	0.00512	0.058491	-0.444549	-0.105258	0.115925	0.127144	-0.257859	0.266481	-0.013804	-0.052027	-0.224434	-0.135507	0.009498	0.033716	0.097303	-0.043766	-0.156093	0.063229	0.120857	0.028234	-0.094937	0.122129	-0.073711	-0.505488	0.559692	-0.093522	0.147205	0.00653	-0.244869	0.293341	-0.025178	-0.032874	0.058831	0.07588	-0.362438	0.314522	-0.142866	-0.026065	-0.143318	-0.508624	0.055761	-0.055191	0.016499	-0.067172	0.04664	0.32449	0.308621
frg_6	0.288495	0.036427	-0.539721	-0.030316	-0.085642	0.012268	-0.067749	0.101152	0.006826	0.266272	-0.158561	0.050555	-0.196968	-0.10176	0.227517	0.045234	-0.430293	0.434473	0.05892	-0.238891	-0.18128	0.037414	0.087441	-0.008448	0.038955	-0.178612	0.21652	0.006817	-0.158019	0.007559	0.269151	-0.117262	0.043876	0.448994	-0.263243	-0.124155	-0.202037	-0.075066	-0.054965	0.26004	-0.161031	0.05608	-0.147183	0.324031	-0.09186	0.201311	-0.138721	0.161803	-0.167406
frg_87	0.076825	0.342046	0.141376	0.167231	-0.059887	0.286415	-0.444722	0.517608	-0.256434	0.364278	0.189669	0.153069	-0.14431	0.224815	0.001128	0.169658	-0.172876	-0.253744	-0.026791	0.020168	0.017339	0.22275	0.346022	0.099865	-0.219821	-0.329058	0.018099	0.026899	-0.179409	-0.128488	0.278268	-0.191824	0.187508	0.186199	-0.00893	0.018063	0.285736	-0.027731	0.161654	-0.050608	-0.225918	-0.033596	-0.010653	-0.065685	-0.020592	0.178039	0.375381	0.322503	0.190435
frg_20	0.161506	0.098399	0.3156	-0.193482	-0.372128	-0.275637	0.354137	-0.187978	0.258557	0.453651	0.228215	-0.154719	0.453986	0.315382	0.457276	-0.067718	0.165732	0.079739	0.23428	0.119729	-0.302734	-0.034907	0.044548	-0.174284	0.222804	0.108223	0.23389	-0.213432	0.005285	0.230328	0.095338	-0.261267	-0.106862	0.257753	0.220164	-0.238398	-0.488156	0.481269	0.236763	0.173832	-0.212783	-0.005205	-0.029192	-0.067328	0.026125	-0.352272	-0.228206	0.441341	-0.042157
frg_16	0.435635	-0.061721	0.036247	-0.123189	-0.154688	-0.091994	0.075661	0.158853	-0.311398	0.200386	-0.175491	-0.041086	0.000472	-0.073469	0.300951	-0.139886	-0.035058	0.408985	-0.256632	0.495896	-0.156723	-0.096423	0.303042	0.20897	0.046533	-0.388301	-0.088547	-0.178815	0.018237	0.104065	0.027943	0.177816	-0.114465	0.014675	0.37676	-0.187494	-0.200418	0.343323	-0.062287	-0.165686	-0.728624	0.502876	-0.06603	-0.20603	-0.517259	0.039381	-0.27494	0.079866	-0.207931
frg_120	0.126079	0.183827	-0.005973	0.155037	-0.356966	0.41978	0.014568	0.191093	0.041401	0.671008	0.094411	-0.360097	-0.035403	0.345556	0.011697	0.091112	-0.150284	-0.103684	-0.579224	0.089256	-0.28464	-0.048043	0.191965	0.10145	-0.140527	-0.491012	0.262321	0.243779	-0.127826	0.191998	0.100795	-0.189512	0.187355	0.024914	0.185209	0.101182	0.113475	0.124585	0.167026	-0.267543	-0.090235	-0.371473	-0.033193	0.180287	-0.338421	-0.2061	0.171604	0.003836	-0.051941
frg_17	0.308882	-0.039875	-0.179295	0.08032	0.172926	-0.019428	0.059376	0.48512	0.180416	0.121507	0.091166	-0.175216	-0.04528	0.373838	0.523777	-0.2902	0.017768	0.699551	-0.283239	-0.209293	-0.696498	-0.233449	-0.141476	0.006216	0.233319	-0.237738	0.197399	0.448367	-0.221175	0.022926	-0.185973	0.232201	0.205392	0.143669	-0.056417	-0.301946	-0.326818	0.12594	-0.116736	-0.179987	-0.370888	0.564249	-0.067141	-0.023559	-0.094263	0.127429	-0.386105	-0.137994	-0.320905
frg_88	0.264408	-0.417819	-0.09509	-0.097377	-0.239271	0.164622	0.259758	0.005575	-0.372356	0.396315	-0.283473	-0.07091	-0.47247	0.189368	-0.017137	-0.292701	-0.093144	0.208457	-0.047155	0.636118	-0.20129	-0.404447	0.145081	0.16441	0.169269	-0.088573	0.054515	-0.052044	0.03621	0.283322	-0.149051	-0.093781	0.24734	0.136918	0.174678	-0.457282	-0.071554	0.495125	0.030896	-0.077098	-0.460319	0.338235	0.311912	0.268814	-0.205734	-0.194906	0.493983	0.317615	-0.071977
frg_50	0.288772	-0.312342	0.126949	-0.175307	0.071239	0.046062	-0.187448	0.388159	-0.560225	0.326427	0.238673	-0.675348	0.047194	-0.037652	-0.12484	0.008079	-0.279182	0.39856	-0.231022	0.18698	-0.036647	0.082198	0.142659	0.227888	0.411685	-0.635293	0.262584	0.141158	-0.072881	0.089571	0.088789	0.012704	-0.353821	0.4386	0.469158	-0.01094	-0.398234	0.027807	0.123076	-0.146806	0.095936	-0.294626	0.039171	0.00347	0.323555	-0.119684	0.098318	0.200266	0.206658
frg_210	0.077556	-0.071171	0.058094	-0.124665	-0.064948	0.40671	-0.156696	0.279737	-0.194047	0.19977	0.069127	0.158332	0.062243	-0.101609	0.081123	0.514022	-0.428637	-0.286015	-0.19924	-0.013739	-0.058298	0.358908	0.327818	-0.173636	0.021313	0.041446	0.11114	0.22095	-0.180348	0.313997	0.067888	0.19539	0.03382	0.761943	-0.221547	-0.249928	-0.005313	-0.455209	-0.003921	0.224608	-0.006411	-0.478553	0.089168	0.172987	-0.08283	-0.041581	0.221698	0.454393	0.28344
frg_3	0.444856	0.195002	-0.096452	-0.04625	-0.236027	-0.053469	0.234386	0.318628	-0.005693	0.319483	0.061897	-0.221128	0.158462	-0.110606	0.170189	-0.810299	0.146823	-0.103839	0.17417	0.04977	0.053782	0.238749	-0.037274	0.156792	-0.171969	-0.140191	-0.117053	0.059114	0.264392	-0.171315	-0.133518	-0.376185	0.260587	0.3787	0.121353	0.062623	-0.517624	0.10485	0.062815	0.044852	-0.261902	-0.089918	-0.23765	0.133855	-0.137536	-0.109376	0.014123	-0.157958	-0.149748
frg_24	0.019636	0.534319	0.106494	-0.071554	-0.387525	-0.06471	0.097697	0.272057	-0.281054	0.418279	-0.037361	-0.246298	0.102409	-0.009323	-0.239331	0.186044	-0.250799	-0.434869	-0.125343	0.204705	-0.009482	-0.123969	0.43785	0.321899	-0.134889	-0.442106	-0.020555	0.093122	-0.223753	0.461632	0.032661	0.178476	0.586855	0.398628	0.193946	0.024735	-0.225089	0.161756	0.18955	0.091535	-0.035462	-0.000398	0.011653	-0.256776	0.105004	0.114601	0.180566	-0.131072	0.301716
frg_76	0.192158	0.083765	0.332032	0.190882	-0.292543	0.022878	0.197372	-0.18654	-0.278188	0.712311	0.025248	-0.41342	0.25751	0.260327	0.152181	-0.153078	-0.043534	-0.301684	0.202182	0.144125	-0.023079	0.130373	0.005825	0.126662	-0.25886	-0.088725	-0.057024	0.064352	-0.35202	0.380929	-0.227931	-0.020418	0.406689	-0.00797	0.168882	-0.029585	0.117426	0.088915	-0.335017	-0.1536	-0.492448	0.271167	0.327585	0.007375	-0.058211	-0.088219	-0.178148	0.113061	-0.100144
frg_93	0.286524	0.250751	-0.331494	-0.313814	-0.524222	0.345977	0.063837	0.33858	-0.582578	-0.206961	0.264973	0.224168	0.291172	-0.091642	0.330605	0.396188	-0.356576	-0.180249	-0.36147	-0.086152	0.005419	0.192444	-0.120157	0.017708	0.127473	0.065255	-0.035425	-0.049174	-0.45654	0.479653	0.032297	0.170912	-0.272506	0.308387	-0.139719	0.196691	-0.198418	0.108782	0.071989	-0.00634	0.074411	-0.002625	0.181712	0.25085	0.063411	-0.141436	0.484907	0.386804	0.106631
frg_131	0.098282	0.093329	-0.045972	0.026929	-0.270858	0.164731	-0.259698	-0.195374	0.431874	0.486836	0.461638	0.075927	-0.125548	-0.070331	-0.1652	-0.204323	-0.134165	-0.308011	-0.273578	-0.126553	-0.349854	0.262714	0.226326	-0.155912	-0.145773	-0.085493	-0.097092	0.02989	-0.101098	0.293798	0.025133	-0.475395	0.109541	0.423732	0.222419	-0.316954	0.103445	0.051929	-0.236195	-0.17357	0.207871	-0.391947	-0.106174	0.367928	-0.007021	0.224471	0.673861	-0.113946	0.195309
frg_35	0.009056	0.537061	0.248224	-0.044308	-0.244847	-0.092748	-0.443285	0.410308	-0.124418	0.56186	0.323004	0.213316	-0.033587	0.258287	0.010321	0.182936	-0.185729	-0.185567	-0.026114	-0.091657	-0.351507	0.313961	0.266149	0.26921	-0.093639	-0.250591	-0.117289	0.25883	-0.05001	0.00972	0.214216	-0.096822	0.209331	0.140473	0.059427	-0.286352	0.293969	0.124831	0.080045	0.29795	-0.236586	-0.211612	-0.086621	0.26937	0.07252	0.250454	0.58561	0.497969	0.009221
frg_91	-0.065972	0.416886	0.378274	-0.436028	-0.025706	0.054401	-0.38863	-0.0675	0.259297	0.443405	-0.416951	0.002244	-0.346838	-0.00458	-0.124947	-0.263365	-0.182445	0.306892	-0.436004	0.245144	-0.098016	0.016616	0.247231	-0.167146	-0.169862	-0.411118	-0.321849	0.130726	0.463847	-0.268046	-0.145626	-0.210081	0.341601	0.428696	-0.074792	0.642634	-0.298892	0.371822	-0.267538	0.189544	-0.130532	0.127996	-0.024026	0.412316	0.355303	-0.022095	-0.157141	0.384623	0.348881
frg_12	0.4437	0.138724	-0.156999	-0.444936	-0.404123	-0.176438	0.375259	0.000424	-0.097321	0.504422	-0.242659	0.236144	-0.009937	-0.12685	0.61437	-0.335536	-0.028071	0.189565	-0.249808	0.39609	-0.354108	0.00854	0.604675	-0.426292	-0.150282	0.088574	0.152361	-0.359816	-0.07403	0.392281	-0.054617	0.587306	-0.186731	-0.095224	0.105699	-0.199891	-0.181727	0.397605	-0.285771	0.048738	-0.33463	0.422108	0.052252	0.002545	-0.265761	0.201931	-0.177988	0.234009	-0.388448
frg_15	0.384758	-0.039964	-0.285557	0.169687	-0.323259	-0.165154	0.252938	0.370649	0.374967	0.595772	0.224646	0.166816	-0.215594	-0.06338	0.149065	-0.261354	0.286359	0.439252	-0.249004	-0.033356	0.042937	-0.460765	0.298144	0.343575	-0.180939	-0.147355	0.313363	-0.054423	0.297029	-0.085303	-0.415951	-0.08403	0.083892	-0.104047	-0.181855	-0.151216	-0.433734	0.138282	0.104867	-0.104502	-0.662139	0.221727	0.03973	0.132923	0.144384	-0.442145	-0.257136	-0.337167	0.152118
frg_175	0.0489	-0.245589	-0.169314	-0.105072	-0.479337	0.185095	-0.558837	-0.011964	0.092847	0.213622	-0.009894	0.193798	0.170937	0.004256	0.025157	-0.211058	-0.22995	-0.057852	-0.014166	-0.048533	-0.285273	0.212984	-0.20908	0.228656	-0.343723	-0.373084	0.666445	0.320446	-0.115876	-0.136206	0.073843	0.071352	0.051818	0.097513	0.093118	0.214401	-0.049044	0.452223	-0.046462	-0.016054	0.241794	-0.012278	0.291976	0.08844	-0.332045	-0.30157	0.092678	-0.071455	-0.245196
frg_34	-0.009368	0.31437	0.093508	-0.310239	-0.100401	-0.112451	-0.277165	0.503551	-0.122766	0.44405	0.28962	0.170919	-0.293406	0.179896	-0.194234	0.359054	-0.094676	-0.265253	0.265417	-0.111854	0.077687	0.328773	0.376784	0.004679	-0.159186	-0.732484	0.143907	0.334085	-0.236297	0.173566	0.476333	-0.306639	0.107399	0.138335	0.247168	-0.057378	0.300601	0.221646	-0.044515	-0.057601	0.036932	-0.141426	0.096426	0.162971	0.017129	-0.148256	0.15339	0.056582	-0.059021
frg_63	0.276336	-0.14569	-0.010693	-0.10926	0.029385	-0.189759	-0.04702	-0.121007	-0.599629	0.500949	-0.092746	-0.066246	0.109392	-0.194254	0.293287	-0.277895	-0.267525	0.260958	-0.106861	0.540219	-0.046468	-0.33968	0.319879	-0.04423	0.157227	-0.082271	0.245502	0.083707	-0.44572	0.308613	0.233349	0.011222	0.090676	0.03292	0.15531	-0.764138	-0.442874	-0.297172	-0.203698	0.178946	-0.354781	0.13558	-0.210267	0.370899	0.04874	0.15816	-0.128459	-0.011881	-0.264217
frg_33	-0.121102	0.464994	0.639819	0.283543	-0.094038	0.00039	-0.312134	0.399189	-0.058249	0.483599	0.411321	0.293809	-0.277397	0.162229	0.105931	0.159289	-0.062803	-0.010497	-0.085238	0.092501	0.078216	0.104683	0.199655	0.100589	0.091156	-0.283273	0.089993	-0.064907	-0.290682	0.051768	0.189178	-0.019885	0.123814	0.064578	-0.092146	-0.012199	-0.010731	-0.134237	0.310288	-0.267136	-0.204862	-0.244282	-0.085854	0.068369	-0.240801	0.137799	0.73687	0.050653	0.29219
frg_30	-0.120197	0.204984	-0.154929	0.179771	-0.036629	0.44972	0.218207	0.246018	-0.030724	0.456899	0.312485	0.071723	0.192196	0.177574	0.361587	-0.24795	-0.222238	0.187228	-0.333264	0.05694	-0.23872	-0.286595	0.350307	-0.242663	0.173479	-0.242634	0.509985	-0.740562	-0.097175	-0.0642	0.335115	-0.106846	0.032748	0.250717	0.149203	-0.283629	-0.193588	0.100564	0.054626	0.4598	-0.321376	-0.274746	-0.155135	0.154982	-0.015146	-0.01856	-0.068026	0.108181	-0.002629
frg_44	0.212926	0.298163	0.117741	-0.036083	0.107907	-0.024981	-0.087954	-0.171733	-0.18257	0.138051	0.235888	-0.216313	0.129193	-0.051571	0.251289	-0.138824	0.281899	0.435582	-0.206651	-0.205922	0.454415	-0.429486	0.158766	0.013568	0.380405	-0.47218	0.497176	0.062328	0.139687	-0.305647	0.043162	-0.008374	0.161623	0.651966	0.00874	-0.132836	-0.442036	-0.229195	-0.049934	0.297538	-0.273113	0.347308	-0.057437	0.152316	-0.342394	-0.070863	0.196288	0.099114	-0.154912
frg_18	0.247123	0.026061	-0.578398	0.226241	-0.224266	0.39765	0.158983	0.453468	-0.356072	0.476701	-0.213131	-0.043107	0.024808	-0.096522	0.328109	-0.059917	-0.164328	-0.336567	-0.086922	0.32915	-0.28174	-0.222906	0.423256	-0.479118	0.454906	0.092099	0.352152	-0.51592	0.208036	-0.088144	0.291835	0.20809	0.167491	0.133812	0.538571	0.011809	0.087269	0.216502	-0.444299	0.161092	-0.13759	0.132315	-0.024491	0.246436	-0.584559	-0.142084	-0.296755	0.102425	-0.035742
frg_39	0.314488	0.48295	-0.37543	0.388489	-0.265464	0.409096	0.345042	0.017825	-0.243018	0.493775	0.250647	0.081877	0.119116	0.059927	-0.227082	-0.107416	0.194173	0.002706	-0.342269	-0.172787	-0.316687	-0.112609	0.09083	-0.205072	-0.105269	-0.245005	0.04321	-0.11882	-0.316054	0.482644	0.11994	0.101306	-0.011027	-0.322993	0.162112	-0.237809	-0.411218	-0.076735	0.115236	0.093335	-0.698902	-0.110954	-0.108589	0.052035	-0.421139	0.551045	-0.463492	0.163607	0.198305
frg_38	0.281035	0.068108	-0.13468	-0.036072	-0.153564	-0.200287	0.3132	0.222014	-0.596183	0.124387	0.156218	-0.0082	-0.088537	-0.112477	-0.124664	0.239945	0.134684	0.123655	-0.426633	-0.183965	-0.201539	-0.374354	0.409863	-0.121735	-0.140906	-0.016393	0.493486	-0.152796	-0.183906	0.33691	0.262743	0.065608	-0.331584	-0.206264	0.216868	-0.405455	-0.471361	0.245722	0.405134	-0.256007	-0.167179	0.161536	0.003669	-0.122545	0.033835	0.123221	0.028677	0.309626	0.316651
frg_32	-0.034695	-0.018509	-0.026052	-0.252863	0.24634	0.193737	0.084943	-0.114777	0.28662	0.21277	0.368989	0.291727	-0.627008	-0.08259	0.247521	0.104717	-0.155861	-0.257143	-0.214784	0.158821	-0.36354	-0.011846	0.369328	0.042591	0.529068	-0.299678	-0.081463	0.142457	-0.059487	0.205337	0.368999	-0.026411	0.246453	0.594054	0.056451	0.117739	0.245015	-0.174876	0.401948	-0.154418	-0.334411	-0.548935	0.022129	-0.041806	-0.208233	0.042099	0.255744	-0.110474	0.375032
frg_4	0.474794	0.008098	0.108878	0.083215	-0.303037	-0.139029	0.571887	0.013765	-0.082966	0.08891	-0.282131	-0.084211	0.042605	-0.088285	0.106936	-0.230305	0.177245	-0.001604	0.08386	0.531458	-0.649981	-0.136032	0.325716	-0.730555	0.07512	0.35452	0.181983	-0.1103	-0.123643	0.326087	0.430845	-0.174947	0.209132	0.196363	-0.09136	-0.196553	0.132078	0.14785	-0.29311	0.138512	-0.246016	0.33164	0.115533	0.236843	-0.243508	-0.05544	0.196813	-0.188052	0.241803
frg_45	0.237434	-0.11158	-0.572337	-0.113846	0.062481	-0.034806	0.094711	0.068215	0.01028	-0.021496	0.232182	-0.254327	-0.39804	0.422347	0.302684	0.084563	-0.095695	0.743321	0.013371	-0.179926	-0.441886	-0.04417	0.014332	-0.081529	-0.282438	-0.352996	0.336535	0.402647	0.355215	-0.431377	-0.042627	-0.079125	0.150781	0.038339	0.246109	0.061171	-0.453203	-0.018359	0.037544	-0.122484	-0.676162	0.310012	0.026927	0.352721	0.068607	0.171819	-0.325841	0.025637	0.159065
frg_46	0.011204	0.538472	-0.310883	0.095446	-0.06688	-0.092032	0.145564	-0.198607	-0.057955	0.549465	-0.058078	0.371747	-0.418529	-0.051882	0.12483	0.065185	-0.396751	0.114992	-0.035241	-0.274592	-0.095056	0.386082	0.101545	-0.29822	0.355327	0.041072	0.063533	-0.251347	0.02937	-0.220793	0.035476	0.206774	0.021077	-0.056956	-0.050201	-0.120693	-0.171086	-0.009669	-0.260732	-0.039974	-0.100724	-0.175734	0.280994	-0.437302	0.197135	-0.53794	0.351491	0.340975	0.045961
frg_72	0.322082	0.155088	-0.345016	-0.015491	0.046334	0.260106	-0.043077	0.346081	0.149095	0.213462	0.116718	0.281939	-0.269247	0.097543	-0.294422	0.39507	-0.462716	0.095207	0.380576	0.284666	-0.051677	0.070476	0.327848	-0.389796	0.104523	-0.00814	0.319918	-0.070643	0.109625	0.136011	0.183525	0.34957	0.066128	1.00463	0.118114	-0.65734	-0.183235	-0.019226	0.025131	-0.047271	-0.094857	0.140442	0.011151	0.329273	0.057894	-0.362418	0.10583	0.078314	-0.021146
frg_226	0.368151	0.447051	0.079358	-0.043233	-0.355103	0.001333	-0.216393	-0.122814	0.554356	0.172468	-0.066299	0.416323	-0.554527	-0.048757	0.25816	0.43648	-0.539277	0.081839	-0.090709	0.374519	-0.148489	0.125977	0.073445	0.081209	0.306003	-0.321653	0.074273	-0.220258	-0.278693	0.357706	-0.204431	0.030436	0.059338	0.21295	0.11032	-0.035259	-0.124631	-0.407071	0.213466	-0.350856	-0.162064	-0.414246	-0.707464	0.644344	-0.122661	0.023766	0.437472	-0.428749	0.389458
frg_29	0.571886	0.469425	0.40778	-0.064107	-0.465647	-0.121671	-0.145955	-0.226464	-0.034722	-0.209894	-0.03451	-0.868532	-0.283231	0.38912	0.045532	0.132493	-0.366973	-0.651254	-0.485983	0.276692	-0.180148	0.162082	-0.129845	0.530582	0.055672	-0.231514	0.142102	-0.092943	-0.066391	0.470048	0.485125	0.21619	-0.081267	0.127965	0.086349	0.122178	-0.173859	-0.015763	0.483906	0.150745	-0.022501	-0.277454	0.129583	0.036997	0.044033	0.385805	0.307865	0.190225	-0.14728
frg_246	-0.037537	0.723875	0.147583	-0.043824	-0.378552	-0.075065	0.485173	0.37422	-0.162149	0.237125	0.113853	0.426266	-0.144625	0.184815	0.136473	0.13362	0.281056	0.177351	-0.406269	-0.132601	-0.360299	-0.192077	0.655816	0.510977	-0.213076	-0.449337	0.583212	-0.249093	-0.348707	0.11971	-0.230466	-0.018153	0.315644	-0.226494	0.166052	-0.136084	-0.344753	-0.434694	0.684947	-0.43215	-0.287355	-0.194471	0.341545	-0.309291	0.481201	0.416928	0.308624	0.142481	-0.12262
frg_74	0.098177	-0.249589	0.280643	0.454103	0.255556	0.153029	-0.303847	0.19583	0.112455	0.219276	-0.112979	-0.397274	-0.096051	0.166328	-0.121287	0.032204	-0.13962	0.595844	-0.530026	-0.246183	0.215497	0.066395	-0.194808	-0.037416	-0.028544	-0.465163	0.104335	0.081282	-0.24433	-0.048294	-0.287067	0.519251	-0.233791	0.580514	0.141906	-0.228958	-0.397087	-0.378505	-0.035102	0.364689	-0.131808	0.736467	-0.093892	0.214911	0.393217	0.000699	-0.166661	-0.078543	0.080299
frg_41	0.370464	-0.169193	0.290359	-0.114489	-0.24446	-0.111698	0.235783	0.214395	-0.307235	0.317837	0.084185	0.195366	-0.332869	-0.010934	0.612214	-0.629836	-0.160731	0.241521	-0.159626	0.410214	-0.47862	0.115171	0.435237	-0.567853	-0.90862	0.181868	0.266426	-0.265457	-0.419877	0.506711	0.247376	0.239434	-0.498132	-0.239744	-0.087926	-0.167415	-0.713626	0.309929	0.606494	-0.035184	-0.921919	0.824318	0.355666	0.017493	-0.043322	-0.224085	-0.196508	0.065751	0.168693
frg_47	0.163491	0.431637	0.049126	0.157094	-0.095753	-0.118721	0.260989	0.003248	-0.119951	0.394943	-0.046111	-0.036754	-0.371778	-0.272398	-0.133547	0.49956	-0.101397	-0.263771	-0.119745	-0.007524	-0.143217	0.030003	0.470411	3.3e-05	0.050174	-0.108402	-0.071186	-0.115474	0.200593	-0.212111	-0.092095	-0.02062	-0.319136	-0.276963	0.332387	-0.286033	-0.267496	0.170024	-0.578538	-0.26017	-0.450374	0.159694	0.429195	-0.139083	-0.460756	-0.382623	0.254462	0.165476	-0.06921
frg_156	0.653013	0.386539	-0.064221	-0.054938	-0.598774	-0.160797	0.230909	0.255328	-0.141265	0.162517	-0.049318	0.389876	-0.10585	0.600876	-0.219212	0.266294	0.26741	0.134964	-0.452848	-0.10431	-0.362839	-0.06668	0.487883	-0.047074	-0.11661	-0.223058	0.25426	-0.072566	-0.059537	0.256949	0.654123	0.262927	0.035263	0.062237	-0.032772	-0.12105	-0.549098	0.016143	0.171437	-0.063903	-0.198364	-0.459286	0.310883	0.053707	0.112482	0.210886	0.067385	-0.307424	0.133191
frg_255	0.166246	0.868023	-0.501453	-0.208932	-0.225329	0.552965	0.284441	0.202682	-0.535667	0.070269	0.167995	-0.568045	-0.522949	-0.09018	-0.177328	0.319524	0.112106	-0.445199	-0.32319	-0.172914	-0.395999	-0.250171	0.099596	0.408094	0.305741	-0.101112	0.149497	0.208573	-0.225162	0.351805	-0.161822	0.117172	0.0665	0.568159	-0.356305	-0.22773	0.17692	0.074142	0.230227	-0.443734	0.122789	0.129067	0.427825	-0.208345	0.590284	-0.244331	0.453396	0.152441	0.517557
frg_190	-0.260556	0.10823	0.358543	-0.261853	-0.110603	0.131547	-0.148363	-0.230843	-0.088355	0.26507	-0.145545	-0.214269	-0.18507	0.285545	-0.145013	-0.148795	-0.380088	0.162494	-0.387118	0.031237	-0.254153	0.312452	0.106701	-0.086569	0.116098	-0.352084	0.166989	-0.007699	0.116518	0.295415	0.329757	-0.212617	0.121283	-0.076953	0.052179	0.142814	-0.204195	-0.272042	0.099139	-0.177337	0.020746	0.221675	0.566235	0.136432	0.117444	0.18523	-0.329301	-0.544092	0.262534
frg_57	0.191168	0.203456	0.003154	0.063784	0.036887	0.231308	0.080355	0.165317	-0.181648	-0.078987	-0.37497	-0.104956	0.160813	0.590908	0.227891	-0.255231	-0.125873	0.537094	-0.327847	-0.335894	-0.467308	-0.134984	0.159668	0.136156	-0.135426	-0.227494	0.289129	0.267868	0.194295	-0.100463	-0.477998	-0.063986	0.19691	0.100933	0.087029	-0.10171	-0.395763	-0.010577	-0.072343	-0.037422	-0.087674	0.226154	-0.221919	0.292008	-0.109326	0.05358	-0.245921	-0.176012	0.227295
frg_28	0.383294	0.214004	0.088818	-0.120675	-0.131402	-0.074874	0.189609	0.200819	0.144373	0.155291	-0.052273	-0.719687	-0.056467	0.406734	-0.042454	-0.054972	-0.385263	-0.521217	-0.571598	0.320886	0.197094	-0.214388	0.08143	0.333653	-0.036765	-0.094303	0.123981	0.236373	-0.153219	0.289981	0.224688	0.209032	0.145555	0.241982	-0.081221	0.482743	-0.24841	0.197936	0.232222	0.060995	0.405493	-0.165885	0.334856	-0.183214	-0.231417	0.581265	0.425734	0.177188	0.06929
frg_1	0.212496	0.125929	-0.290912	0.162665	0.400288	-0.061682	-0.088499	0.526408	-0.263677	0.202352	0.191144	-0.100844	-0.308152	0.115595	0.159127	-0.174128	0.059343	0.044245	-0.206924	0.306225	-0.411527	-0.065834	0.275665	-0.27587	0.069355	-0.425188	0.022453	0.219819	0.053057	-0.439411	-0.604939	-0.0707	0.078486	0.292644	-0.048091	-0.041	-0.278159	-0.11744	-0.062556	0.280216	-0.263335	0.087958	0.063787	0.217626	-0.335329	-0.038601	-0.359974	0.0298	-0.374017
frg_104	0.451851	-0.205977	-0.266242	0.50836	-0.097947	0.071057	0.422753	-0.181569	-0.47243	0.466993	0.600706	-0.407328	-0.19929	-0.158906	0.356725	0.034494	-0.052019	0.278162	-0.164631	0.413633	-0.524543	-0.129553	0.504284	-0.049809	0.26269	-0.385689	0.174534	-0.1638	-0.332815	-0.048635	0.122444	0.502448	0.471257	0.288175	0.00423	0.160645	-0.269676	-0.023385	-0.115524	-0.196891	0.099957	-0.258763	-0.083489	0.191015	0.242593	0.043582	0.086289	0.360581	-0.574256
frg_62	0.552392	-0.076396	-0.146839	0.132373	-0.158811	-0.12685	0.093032	0.16532	-0.306756	0.063559	0.09828	0.57916	-0.14797	0.046785	-0.549821	-0.011893	0.349009	0.121468	-0.475257	0.066577	-0.705026	0.109268	0.135761	0.045699	-0.171523	0.149224	0.264185	-0.043151	-0.139433	-0.057353	0.089169	0.412622	-0.247659	0.02293	0.059603	-0.251215	-0.681526	0.03569	0.388018	-0.11705	-0.482227	0.089288	0.165345	-0.223223	-0.091494	0.118146	-0.259318	0.175387	0.463969
frg_171	-0.117785	0.203929	0.172284	-0.012597	-0.299384	0.327358	-0.210315	0.039631	-0.079218	0.076286	0.257658	-0.253194	0.383681	0.232799	0.333518	-0.138583	-0.473579	-0.22251	-0.191949	0.075227	0.12284	0.194209	-0.543017	0.021362	0.280328	-0.269872	0.775864	0.393724	0.097209	0.260106	0.112602	0.109427	0.402735	0.229219	0.107052	0.159041	-0.258644	-0.36053	-0.093906	0.156645	-0.188876	-0.220972	-0.033655	0.816815	0.273003	-0.194951	-0.238608	0.503038	-0.096702
frg_258	0.175132	0.137773	0.404533	-0.297074	-0.522955	0.158533	-0.282607	-0.491261	0.203901	-0.235169	-0.073736	-0.108804	-0.141996	-0.182583	-0.055218	-0.193319	-0.663171	0.210648	-0.321871	-0.395109	-0.10639	0.218182	-0.106532	0.007268	-0.101672	-0.462006	0.195782	-0.096074	-0.520017	0.19522	0.289889	-0.288628	0.111431	0.383504	-0.023942	-0.051446	0.205363	0.140221	-0.095556	0.330373	0.271661	-0.320455	-0.122648	0.219256	-0.311508	0.676115	0.472799	-0.136581	0.589081
frg_97	0.242899	0.191686	0.137032	0.137523	-0.303991	-0.185594	-0.302623	0.276052	0.118985	0.361613	-0.098026	-0.360504	-0.35757	-0.268212	0.354597	-0.61644	-0.464531	-0.380289	-0.34885	-0.224602	0.101016	-0.156209	0.069096	-0.328664	0.047433	-0.462248	0.514739	0.404009	-0.055156	-0.021646	-0.560516	-0.285339	0.244901	0.027169	0.342138	-0.184692	-0.353523	-0.077233	0.201154	0.366235	0.120448	0.56799	-0.17076	0.01842	-0.200192	0.256726	0.08008	0.071419	0.02538
frg_225	0.199075	0.08008	0.094956	-0.209481	-0.031945	0.54242	-0.315122	0.488089	-0.567841	0.008081	0.633552	0.333942	0.472704	0.124284	0.03442	0.35568	-0.407275	0.015135	-0.535127	-0.001454	0.341812	-0.132071	-0.066723	-0.400637	-0.140949	-0.139297	0.533727	-0.147609	-0.304221	0.739989	-0.016319	0.237477	-0.229984	0.255884	-0.291195	0.11147	-0.159325	0.4156	0.341341	0.244298	-0.015027	-0.17137	-0.221582	0.545819	0.296197	-0.102747	0.290364	0.510563	0.224225
frg_233	0.125993	0.27524	0.089978	0.197152	-0.533814	0.152667	0.199595	0.053811	0.021553	-0.034477	0.158056	-0.272772	0.107727	0.274912	-0.215991	-0.006528	0.040339	-0.167595	-0.194781	0.020919	0.118065	0.151379	0.204431	0.123591	0.097549	-0.620669	0.125363	0.217007	-0.16641	0.300084	0.024897	-0.222182	0.568813	0.497301	0.016182	0.042772	-0.357255	0.33863	0.019969	0.171996	-0.109334	0.237249	0.116433	0.287873	-0.32237	-0.068486	0.155395	0.267149	0.192223
frg_31	-0.032039	0.147709	0.22912	0.011951	-0.760184	0.015441	-0.424938	-0.401065	0.016386	-0.429076	0.364388	0.2241	-0.323972	-0.155675	0.425965	0.185574	-0.107771	0.184124	-0.24432	0.261478	0.084521	0.253461	0.172059	-0.737786	0.20454	-0.016993	-0.064555	0.293102	0.089886	-0.041911	0.400565	-0.118633	-0.184464	0.439683	0.447617	-0.020519	0.071613	0.074038	0.371824	0.423677	0.483021	0.028978	-0.225508	0.157442	0.169918	-0.131794	0.233751	-0.213822	-0.18434
frg_13	0.288039	0.031864	-0.069274	-0.192162	-0.362073	0.01629	-0.132418	0.513686	-0.027373	0.68403	0.028635	-0.029458	-0.282961	0.551335	-0.171703	-0.355299	-0.2785	0.190019	0.020708	0.060924	-0.044442	-0.257903	-0.054398	0.100791	-0.105785	0.102591	-0.080857	0.066179	0.352179	0.1585	-0.572573	-0.226322	-0.068541	-0.082402	-0.099556	-0.151467	-0.297052	-0.39082	0.107288	0.254345	0.23668	0.075904	0.147817	0.146537	-0.167407	0.375296	-0.363736	-0.294739	-0.229174
frg_306	-0.304088	0.280426	0.119723	0.108972	-0.392974	0.464964	0.342714	0.10574	0.567498	0.50161	-0.257488	-0.428349	-0.416636	0.220231	0.295525	-0.38734	-0.408467	-0.273835	0.003889	-0.26575	0.351419	0.03709	-0.025412	-0.458761	0.088269	-0.638394	-0.141697	-0.186666	0.179025	-0.275272	-0.547919	0.410027	0.468536	0.089778	0.492552	-0.162447	-0.047242	-0.035742	-0.055335	0.0748	-0.083129	-0.184304	-0.010877	0.254349	0.01315	-0.125943	-0.014757	0.280445	0.005585
frg_7	0.669723	0.109575	-0.446221	-0.581122	0.397419	0.318227	-0.263364	-0.013689	-0.219807	0.501407	0.03781	-0.252537	-0.30112	-0.142444	0.133811	0.182674	-0.156557	0.02299	-0.003198	-0.111783	-0.309576	-0.065169	-0.078122	0.187094	-0.046477	-0.227301	0.064284	-0.096584	-0.082322	-0.266271	-0.30062	0.221798	0.616234	-0.181923	0.2958	0.216331	-0.441056	0.164403	-0.04007	0.284563	-0.493173	0.184256	0.034665	-0.421895	0.4715	0.075951	-0.081086	-0.426933	0.053166
frg_56	0.228503	0.141252	0.573681	-0.151328	-0.788344	-0.270811	-0.245194	0.16861	-0.22069	0.288274	-0.245114	-0.314799	0.090759	0.745409	-0.061053	0.543992	0.063754	0.106388	-0.149736	-0.147713	-0.147348	0.172474	0.189033	0.152872	0.223921	-0.222059	-0.514363	-0.087911	-0.407404	0.115529	-0.203224	-0.151431	0.408967	0.325388	-0.088021	0.109293	-0.50854	0.383566	0.065918	0.022245	-0.477563	0.348944	-0.498773	-0.187001	0.024105	0.025692	-0.256494	-0.039649	-0.128069
frg_54	0.031813	0.309052	-0.242895	0.414932	0.311803	-0.281902	0.094977	0.18165	-0.063843	-0.010734	0.163809	-0.242064	0.245884	0.151363	0.137469	-0.148596	-0.569347	0.218285	-0.468947	0.085241	-0.118102	0.032946	0.263137	-0.138157	0.439122	-0.369836	0.172208	0.059924	-0.02631	0.048912	-0.35797	0.398079	-0.125904	0.284987	-0.190497	0.116212	-0.078755	-0.172713	0.126318	0.024086	-0.075374	0.611289	0.223099	0.414483	0.368492	-0.078646	-0.307191	-0.168593	0.080034
frg_277	-0.105917	-0.3373	-0.131126	0.24859	-0.334012	0.138387	-0.062892	-0.241855	0.521452	0.009037	-0.249342	-0.403427	0.365483	0.068537	0.333514	0.097558	-0.423277	0.163267	-0.139648	0.099324	-0.223766	-0.183355	0.123382	0.239081	0.647845	-0.639039	0.091651	0.253467	0.511603	0.011248	0.030542	-0.243727	0.243133	-0.063969	0.288265	-0.05291	0.068085	0.102161	-0.291945	0.064131	-0.259286	0.352486	0.005746	-0.106389	0.563288	0.069151	-0.016225	0.921427	0.053495
frg_59	0.174401	-0.330762	6.2e-05	0.132775	-0.633384	0.197085	0.359504	-0.192276	-0.866326	0.354348	-0.268802	0.05275	0.102126	-0.354239	0.37707	0.343766	-0.19867	0.617468	-0.375939	-0.269514	0.038308	-0.253806	1.11401	-0.231717	0.037359	-0.555861	-0.368302	-0.442236	-0.011485	0.334356	0.091006	0.035939	0.316495	0.389814	-0.672207	-0.2712	-0.730018	0.518062	0.105181	-0.112348	-0.262486	0.170325	-0.202277	0.75579	-0.070303	-0.338697	-0.163922	-0.043702	-0.512176
frg_69	0.305523	0.27662	0.091091	-0.030268	-0.210063	-0.376686	0.436858	-0.111982	-0.342847	-0.269951	-0.02392	0.270897	-0.109564	-0.101771	0.070843	-1.13605	-0.078645	0.45775	0.500456	0.136492	-0.220737	0.37838	0.932218	-0.174873	0.051775	0.416368	0.866382	-0.236454	-0.62159	0.607669	-0.153698	0.070249	-0.149263	0.055115	0.149928	-0.014761	-0.869924	0.614143	0.559328	0.231485	-0.256867	0.02994	0.059571	0.162491	-0.154176	-0.39664	-0.180512	0.344292	-0.040939
frg_81	0.355953	0.015949	0.133386	-0.010128	-0.142308	-0.052933	-0.212935	0.209849	0.447226	0.401761	0.085995	-0.417703	0.721731	-0.569494	0.382836	-0.245196	0.037529	0.3156	-0.234137	0.0137	-0.60559	0.381948	-0.02726	0.504712	0.375921	-0.862749	0.377067	-0.1894	-0.223029	-0.336447	-0.460953	0.179717	0.134231	0.07783	0.092183	-0.150312	-0.081821	0.07738	-0.254864	-0.147772	0.26506	-0.585296	0.447868	0.589255	-0.174527	-0.093025	0.121247	-0.228605	0.63854
frg_170	-0.287718	-0.020827	-0.369932	-0.008313	-0.517325	0.160458	-0.517493	0.24834	-0.181017	0.196076	0.510594	0.275736	-0.099613	0.216747	-0.318624	0.279622	-0.575557	-0.382913	-0.374502	-0.009936	0.036135	-0.14295	0.026483	0.076862	0.158972	-0.294217	-0.219143	-0.398344	-0.556164	0.257899	-0.146371	-0.272814	0.101166	-0.123442	-0.044328	-0.21098	-0.475306	0.197519	-0.268827	0.018125	-0.21864	-0.315861	-0.119464	0.438833	-0.310898	-0.424035	0.487642	0.216016	0.483117
frg_174	0.38917	-0.212785	-0.021137	0.173856	-0.05387	0.325508	-0.357297	0.021649	-0.049719	0.132843	0.410784	0.356565	-0.409563	-0.109452	0.173415	-0.272963	-0.014388	0.103651	0.150298	-0.222566	0.038359	0.394284	0.342727	0.073274	0.123784	-0.800954	0.325519	0.370082	0.072112	-0.108287	0.415442	-0.020088	0.247088	0.028216	0.033119	-0.035387	0.211838	0.501109	-0.324356	-0.028543	0.018178	-0.058639	0.156405	0.174098	-0.244835	0.329545	0.34453	0.038844	0.290114
frg_10	-0.152253	-0.084181	-0.111624	-0.065242	-0.378072	-0.041	-0.071675	0.134871	-0.088736	-0.020092	-0.211128	-0.358119	-0.440291	0.010476	0.466047	0.10965	-0.294505	0.389055	0.304799	0.304074	-0.462473	-0.173345	0.740295	-0.836116	0.376455	0.58676	0.437096	-0.606307	0.041596	0.30529	0.273784	0.004759	-0.017005	-0.182597	-0.283408	-0.157752	-0.477416	0.217014	-0.361522	-0.132837	-0.229947	0.386683	0.053854	0.203154	-0.535318	0.174018	0.038856	-0.05751	0.301954
frg_95	0.010219	-0.247106	0.160008	-0.097377	-0.084602	-0.069048	-0.065113	0.318689	0.286116	-0.353798	-0.201807	0.297401	-0.142616	-0.080537	-0.115561	0.485569	-0.167211	-0.204082	0.095547	-0.357827	-0.141545	0.264056	0.320634	0.111754	-0.106296	-0.651836	0.457103	0.510909	-0.282696	-0.392002	0.406206	0.266359	0.387684	0.306126	-0.085268	0.014294	-0.181445	0.772681	-0.312577	-0.105399	-0.164353	-0.099001	0.012252	-0.094806	0.149431	-0.112237	-0.17828	0.07513	-0.085089
frg_281	0.100219	-0.07168	0.64437	0.191452	-0.455697	0.140161	-0.640852	0.748081	0.278784	0.603238	-0.051225	0.147225	-0.00549	-0.265317	-0.1927	0.256557	-0.248642	-0.209516	0.439399	-0.026536	-0.200994	-0.423506	0.041726	0.087196	-0.480792	-0.507325	0.204205	0.18701	-0.298673	-0.150684	0.279393	0.166765	-0.095587	0.112664	0.263961	0.342045	-0.19254	0.212767	0.253585	0.078209	-0.598962	-0.248617	0.174493	0.279909	0.090138	0.237787	0.484107	0.305068	0.273832
frg_143	0.483685	0.162416	0.270272	0.010426	-0.236954	-0.284276	-0.152297	0.137832	-0.324543	0.579229	-0.10973	0.733179	-0.245687	0.204993	-0.276933	-0.13521	0.251025	0.196485	-0.76655	-0.239433	-0.304511	-0.239317	0.693307	-0.017889	-0.150262	-0.301804	0.860277	-0.093034	-0.607837	0.450109	-0.038382	0.050161	-0.276079	0.125005	0.275384	-0.17585	-0.353414	0.439736	0.286078	-0.443181	-0.201746	-0.062607	0.559738	-0.276729	-0.027338	-0.037849	-0.009064	0.029693	0.139032
frg_103	0.213208	0.01434	0.554769	-0.042376	-0.186058	0.131895	-0.734949	0.868227	0.154464	-0.48259	-0.068104	0.238257	-0.377663	-0.153016	-0.266982	0.281433	0.286718	0.131111	0.105495	-0.031748	0.16048	-0.068955	0.354301	0.380003	0.265064	-0.059835	-0.378512	-0.024766	-0.477897	-0.404629	0.37887	0.083626	0.090691	0.069248	0.020386	-0.175056	0.103371	0.784471	-0.139491	0.045719	-0.204219	0.121446	0.194082	0.034119	0.553224	0.017058	-0.273229	0.355136	0.176982
frg_42	0.580684	0.20553	-0.174766	0.275365	0.338841	0.238154	-0.227	0.244766	-0.286745	0.464512	0.371798	-0.341827	0.031372	0.025266	0.190184	-0.377851	-0.115526	-0.022239	-0.09347	0.304504	-0.182635	-0.005997	0.164123	-0.184502	0.244597	-0.605175	0.54415	0.583662	-0.165307	-0.603015	0.287646	0.300223	0.137671	0.444147	0.09776	-0.244892	-0.138279	0.563946	0.148385	0.065594	0.048825	-0.183017	-0.134658	-0.285537	-0.032731	-0.371323	-0.458745	-0.347315	0.710619
frg_148	0.413527	-0.13577	0.060624	0.457085	-0.045335	-0.091907	-0.268796	0.278183	0.812889	0.404133	0.180741	-0.222559	-0.233916	-0.11697	0.075102	-0.281087	-0.545379	0.64543	-0.885565	0.002227	-0.013269	-0.102024	0.256618	0.191867	0.31587	-0.801146	0.238062	0.453629	-0.195312	-0.011275	-0.35268	0.017336	0.310755	-0.283951	-0.190202	-0.332958	-0.167678	-0.259535	-0.247929	0.001054	-0.343542	-0.327958	0.183423	0.254873	0.291142	0.020115	-0.22643	-0.137125	0.53588
frg_11	-0.16049	0.007391	0.551341	-1.00648	-0.220165	-0.207915	0.026113	-0.134673	-0.163566	0.582235	0.25744	0.041999	-0.383607	-0.126251	0.546011	-0.880151	0.390665	0.506917	-0.170148	0.124544	-0.166627	-0.120765	0.685958	-0.440072	0.018513	0.209361	-0.12462	-0.547991	0.127402	0.267775	-0.447057	-0.003721	0.098478	-0.071037	-0.649698	-0.481423	0.033931	0.573932	-0.370253	-0.072167	-0.364244	0.657621	0.03894	0.162455	-0.527737	-0.142371	-0.215685	0.039688	0.141294
frg_261	-0.244019	0.038458	0.060527	-0.304723	0.336995	-0.391342	0.184428	0.181079	0.155288	0.426948	0.376856	-0.293385	0.020598	-0.123131	-0.115875	0.198312	0.183063	0.144926	-0.052886	-0.094523	-0.024316	-0.015083	-0.243369	-0.202301	0.486939	0.094596	0.534125	-0.04692	-0.612325	-0.366691	0.36628	0.158104	0.643679	0.262232	1.00629	0.318178	-0.27304	-0.393114	0.489088	-0.199352	-0.178027	0.682967	-0.433096	0.572732	0.071997	0.088332	-0.28846	0.249944	0.117254
frg_36	-0.04316	0.368533	0.197894	-0.034757	-0.320899	0.368975	-0.223604	-0.508888	0.095552	0.824642	0.715979	0.206052	-0.239698	0.172058	0.181915	0.057154	-0.516788	-0.16981	-0.583169	0.376827	-0.385302	0.317063	-0.096899	-0.073922	-0.572955	-0.04438	0.259328	0.49311	-0.135862	-0.030486	0.313797	-0.340756	-0.031087	0.05784	-0.188013	0.249762	-0.015474	0.095712	-0.290099	-0.254446	0.152506	-0.928413	-0.243346	-0.464243	-0.170895	-0.238649	0.291608	-0.157971	0.649406
frg_130	0.279757	-0.10103	-0.14771	-0.01571	-0.197165	0.07204	-0.629206	0.383191	-0.383701	0.01866	-0.230005	0.242508	-0.165253	-0.170337	0.128205	0.31454	-0.417488	0.001717	-0.056584	0.070621	0.018313	-0.137653	0.591086	0.028974	0.037831	0.052803	0.170833	-0.027874	0.007257	-0.081793	-0.076869	0.476063	0.080503	0.563234	0.125973	-0.356802	0.183195	0.057204	0.249004	-0.060408	-0.407302	0.698147	0.016694	0.890105	-0.27152	-0.408967	0.129879	0.130338	-0.174472
frg_82	0.768285	0.704144	0.01462	0.342739	0.421322	-0.080233	-0.497999	-0.380835	0.21053	0.178439	0.525359	0.086105	0.755791	-0.188594	0.145547	-0.148803	-0.414742	-0.005119	-0.197653	0.348423	-0.035652	0.382457	0.27983	0.00724	-0.331297	-0.407029	0.476824	-0.335716	-0.429271	0.138871	-0.049948	-0.210317	-0.100072	-0.137967	-0.009149	0.195164	-0.601647	0.53358	-0.331911	-0.264276	0.226821	-0.57429	0.109652	0.184109	0.170811	-0.265681	0.440149	0.324259	0.688187
frg_248	-0.022127	0.730326	0.042243	0.014816	-0.355604	0.235252	0.484028	0.0439	0.422378	0.669019	0.127715	-0.186873	-0.27425	-0.150275	-0.252492	-0.414381	-0.353843	-0.304754	-0.096313	-0.217056	0.116882	-0.006329	0.488113	-0.078674	-0.270104	-0.619441	0.017342	0.175807	0.283969	-0.171146	-0.574073	0.410915	0.241871	-0.202508	0.245652	-0.035951	-0.483496	-0.275685	-0.144537	-0.056188	0.027878	0.205325	0.058037	6.3e-05	0.164342	0.278925	-0.531442	0.211084	-0.07648
frg_60	0.120868	-0.088257	-0.424512	-0.476361	-0.449905	0.055451	-0.070596	0.103348	-0.071471	0.016772	-0.19189	-0.102182	0.054173	0.171041	0.506171	0.365873	0.135411	0.265048	0.400505	0.210691	-0.864573	0.496239	0.324036	-0.911309	0.504601	-0.109196	0.008714	-1.0916	-0.413026	0.373594	0.242375	0.107725	-0.027782	-0.342119	-0.033233	-0.243291	-0.742736	0.068898	-0.426094	-0.319258	-0.140248	0.485664	0.393162	0.021907	0.036682	0.464465	0.4805	0.284733	0.293866
frg_160	0.269129	-0.040752	-0.194784	-0.01955	0.033371	-0.702851	0.161673	-0.243414	-0.366475	0.063724	0.204381	0.496635	-0.416018	0.013338	-0.083512	-0.361162	0.204253	0.216451	-0.511505	-0.253384	-0.322743	-0.313439	0.006401	0.537359	0.157855	0.020805	0.396672	-0.196285	0.202506	0.415781	-0.059267	0.196498	0.106156	-0.093574	0.518589	-0.471425	-0.695335	0.588322	-0.258522	-0.107768	-0.470558	0.224536	0.159769	-0.510145	0.057358	-0.270563	-0.060743	0.038015	0.353158
frg_49	0.277296	0.173411	0.012943	-0.36779	0.190451	0.119763	-0.594918	0.073607	-0.098367	0.491272	-0.246394	-0.460972	0.032692	0.33367	0.032229	-0.489111	0.120366	0.413	0.009492	0.240283	-0.183516	0.165421	0.2459	-0.436685	0.23809	-0.23087	0.409604	0.329367	0.367762	-0.190908	-0.278613	0.435129	-0.027226	0.640617	-0.208967	0.221364	-0.476676	0.250296	0.47768	-0.732962	-0.141352	-0.028792	-0.227864	0.436509	-0.106397	-0.01931	-0.172991	-0.137103	0.208396
frg_183	-0.598007	0.333793	0.455725	0.199321	0.037746	-0.039943	-0.380674	0.50233	0.138413	0.342574	0.00866	-0.460983	0.034553	0.500957	-0.295391	0.272829	-0.213219	-0.188918	-0.056923	0.351633	-0.089167	0.461276	0.676345	0.180383	-0.62769	-0.333347	-0.201882	0.044846	-0.157652	-0.337785	-0.041705	-0.060773	0.264129	-0.60553	0.08783	0.018719	-0.196131	-0.587304	0.116664	-0.128764	-0.159316	0.122462	-0.003854	0.564165	-0.091304	0.080279	0.173563	-0.621081	0.150222
frg_249	0.405301	0.229862	-0.217114	0.047798	-0.85475	0.133204	-0.124726	-0.221458	-0.722204	-0.162236	0.093924	0.242604	-0.341156	-0.062551	0.306878	0.176351	-0.371885	0.389762	-0.588955	0.252119	0.181447	0.20351	0.349548	-0.092708	0.070161	-0.766272	0.343275	0.244911	0.072301	0.370186	0.496045	0.309483	0.106544	0.073524	-0.131164	0.065276	0.110929	0.370337	0.200557	0.515354	0.276948	-0.121747	0.202883	0.216556	-0.19332	0.328227	-0.219235	-0.468077	0.411701
frg_189	-0.167072	-0.114551	-0.442717	0.208725	0.328534	0.354852	-0.191953	0.225735	-0.41462	0.375037	-0.247445	-0.372343	-0.394428	0.087159	0.176234	-0.420058	-0.166971	0.018225	-0.260192	0.096388	-0.101906	0.723368	0.520142	-0.21144	0.540161	-0.093034	0.107756	-0.183819	0.197512	0.300031	0.564983	-0.042346	0.309956	0.10741	0.50477	-0.302919	-0.294297	-0.196668	-0.568514	-0.188576	-0.492146	0.004589	0.337578	0.059849	0.203021	0.287811	0.254479	-0.686352	-0.038796
frg_278	0.158652	0.467662	-0.372429	-0.371947	-0.220048	-0.566195	-0.004509	0.488621	-0.035604	0.226872	-0.244219	-0.475684	0.046262	0.131129	-0.051887	0.158132	0.284863	0.761901	-0.239001	0.837753	0.004072	0.161473	0.336372	0.316136	0.075736	-0.461276	0.339217	0.59834	-0.208081	-0.433357	-0.024743	0.714543	1.11488	-0.241803	0.473197	-0.170567	0.107573	-0.029534	0.812	-0.143206	-0.40072	0.158261	0.221229	0.074595	0.368318	0.091303	0.333609	0.182062	-0.039547
frg_65	0.354919	-0.049476	0.048251	-0.323612	-0.187687	-0.181	0.691894	0.348623	-0.463205	0.245724	0.143566	-0.137904	-0.030781	0.354495	-0.010987	-0.357224	0.124256	0.182172	-0.279489	-0.502451	-0.33405	-0.270402	0.367274	0.269208	-0.19008	0.056224	0.496787	0.197518	-0.286887	0.143435	0.634391	0.625649	-0.024343	0.190985	0.235	-0.347733	-0.557758	-0.440384	-0.170933	-0.052741	-0.716366	0.118486	-0.2064	0.359331	0.640481	0.575351	-0.158467	0.402598	-0.000308
frg_309	-0.187555	0.286641	0.263952	0.379058	-0.134326	0.187942	-0.036775	0.099906	-0.024759	-0.501569	-0.106506	0.081257	-0.322461	0.149131	-0.164526	-0.316918	-0.760956	0.421689	-0.256798	0.025085	-0.278033	-0.197516	-0.034727	0.119199	0.110659	-0.508685	0.125192	0.333894	-0.31628	-0.290116	-0.014098	-0.420699	0.550184	0.561579	-0.027079	0.041698	-0.237492	-0.014497	0.470079	-0.341413	0.121678	-0.621767	-0.188795	0.768573	-0.140588	-0.215785	-0.485322	-0.732592	-0.041439
frg_122	0.30254	-0.164793	-0.804578	-0.223695	-0.126075	-0.112737	0.074589	0.357141	0.101849	0.639357	-0.299923	0.140655	-0.581974	-0.677971	0.714998	-0.377961	0.456898	0.098189	-0.306447	-0.401384	0.025245	-0.162763	0.646183	-0.406733	-0.051408	0.295506	0.156542	0.180562	0.680718	0.526421	0.49375	-0.131345	0.266362	-0.068532	0.252983	-0.397753	-0.31587	0.174214	0.655086	-0.116032	-0.006979	-0.631014	0.283583	0.386995	-0.29715	0.058418	-0.604043	0.16225	-0.367348
frg_75	-0.217321	0.3389	0.143736	-0.261106	-0.791794	0.320281	-0.218837	-0.715506	-0.15601	-0.540958	-0.017938	0.062071	-0.807107	0.165876	0.091737	-0.017057	-0.270192	-0.269466	0.050195	0.856665	-0.156142	-0.399215	0.535382	-0.193623	-0.170521	-0.262234	0.118541	0.020114	-0.488424	-0.760705	-0.015288	0.360682	0.208403	-0.015597	0.123617	-0.59124	-0.207057	0.035097	0.135113	-0.000735	0.200571	-0.135075	0.439057	0.450204	-0.611369	-0.012695	0.447282	-0.393018	0.381103
frg_40	0.102422	-0.131306	0.070928	-0.657105	-0.002236	-0.304234	0.448806	0.185423	-0.482281	-0.017672	-0.313142	0.270859	-0.035463	0.431635	0.294707	-0.215728	0.50721	0.08332	-0.158766	0.153721	-0.234065	0.080826	0.542927	0.162416	-0.030049	0.220925	0.745311	0.24102	0.025224	0.421147	0.24444	0.211018	-0.149711	0.571696	0.243951	-0.807546	-0.463124	0.03763	0.028915	0.018892	-0.288995	-0.236108	-0.186862	0.09456	0.417875	-0.037342	-0.170751	0.356326	0.422571
frg_68	0.732316	-0.026717	0.019432	-0.049748	-1.19828	-0.203132	0.084592	0.03368	-1.22622	0.612002	0.217354	-0.267283	-0.595913	0.023909	-0.452336	0.000611	0.256821	0.013673	-0.104597	0.532532	-1.24325	0.229831	-0.109274	-0.024994	-0.174803	-0.470599	0.138046	-0.235234	0.239727	0.484175	-0.228872	0.93675	-0.248121	-0.351293	0.248406	-0.236815	-0.435482	-0.172925	0.21034	-0.304629	-0.652005	0.162805	0.481333	-0.619654	0.079986	-0.63176	0.222667	-0.626404	-0.134363
frg_89	0.401783	-0.454903	-0.310095	0.391777	-1.31578	0.018565	-0.10755	0.341623	-0.604034	0.39228	0.710987	-0.046876	-0.176092	-0.515148	0.330278	0.269523	-0.069328	0.511063	-0.007737	-0.158102	0.06045	-0.38654	0.858916	-0.270195	0.466806	-0.69213	-0.091837	-0.071399	-0.084688	0.629561	-0.178898	0.424049	0.059695	-0.162588	-0.328272	0.000775	-0.81294	0.041939	0.114733	-0.071413	0.397033	0.190471	-0.659994	0.796927	-0.090094	-0.021339	-0.56898	-0.073006	-0.495171
frg_71	0.218694	-0.297809	-0.397674	-0.153574	-0.489668	0.540908	0.161003	0.531872	-0.516988	-0.091122	0.54088	-0.003953	-0.144688	0.038486	0.026442	0.427911	-0.211628	0.039401	-0.210723	-0.163046	-0.107208	-0.327038	0.248446	-0.177787	-0.378234	-0.127791	0.218963	-0.421875	-0.232842	0.452228	0.014344	0.569007	-0.03855	0.478344	0.246847	-0.117214	0.059479	-0.223374	-0.330776	-0.136534	-0.008175	0.130302	0.606584	0.016683	-0.222621	0.198037	0.133028	0.427933	0.200714
frg_292	0.318118	0.541503	0.193593	0.015136	-0.443602	-0.078047	-0.468732	0.030462	-0.472442	0.672506	0.324731	-0.537308	-0.318209	0.326939	-0.212176	0.056219	0.24996	0.044623	-0.324052	0.564383	-0.170339	-0.424577	-0.27806	-0.193714	-0.605087	-0.591475	0.096307	0.41132	-0.193821	-0.261233	-0.096864	0.163214	0.900296	0.46265	-0.156772	-0.10071	-0.81106	0.140431	0.764941	-0.23357	-0.147989	-0.148946	-0.01499	0.501407	-0.327562	-0.083838	0.189546	0.155411	0.146757
frg_273	-0.103462	0.388153	-0.534017	-0.205481	-0.110182	-0.188238	-0.126065	-0.448526	-0.215798	0.348013	0.158663	-0.19848	0.284948	-0.101598	-0.08115	0.172906	-0.683227	-0.531684	-0.588734	-0.028519	-0.548527	0.317799	0.523214	0.296259	0.088547	-0.09413	0.497268	-0.087887	-0.714672	-0.019009	0.109018	-0.120031	0.192874	0.084535	0.419482	-0.083681	0.423275	0.225682	0.143491	-0.338231	-0.478634	-0.395192	-0.311137	0.352491	0.372957	0.267897	0.481995	-1.1986	0.035701
frg_21	0.541518	0.368833	-0.229536	0.017444	-0.421327	-0.527631	-0.348753	0.027949	-0.207577	-0.63461	0.092002	-0.094941	0.224169	0.367134	0.281709	-0.079957	0.353774	-0.470118	-0.050746	-0.246626	-0.818111	0.230218	0.615206	0.28249	-0.118944	0.523363	0.254132	-0.340281	0.211011	0.364922	0.32023	-0.340191	0.307185	-0.066078	0.591791	-0.021901	-0.679816	-0.151658	-0.146827	-0.053654	0.061773	0.757562	-0.154932	0.302905	-0.471501	-0.180771	0.487946	0.250532	0.354083
frg_199	0.08291	0.414109	-0.388797	0.0972	-0.620108	-0.168471	-0.528522	-0.117963	1.14789	0.283198	0.120979	-0.448781	0.148382	0.081057	0.254135	0.074118	0.468697	-0.345503	-0.651683	0.357809	-0.283556	0.94531	0.215959	-0.302411	0.017862	-0.677249	0.015691	0.568983	-0.205115	0.265316	-0.192312	-0.113541	0.650409	0.21147	-0.210532	-0.360807	-0.752472	0.336695	-0.226825	-0.549966	-0.12262	0.658389	0.394685	-0.598234	-0.494623	-0.037003	0.312769	0.337007	0.060519
frg_173	0.03544	-0.105901	0.413726	0.41755	-0.178379	0.251176	-0.657856	-0.58922	0.68207	0.167585	-0.117754	0.52192	0.255244	0.163519	0.195114	0.146558	-0.158435	-0.391969	0.000149	0.169422	-0.059837	-0.263043	-0.158806	-0.409622	0.202199	0.065034	0.209965	0.379698	-0.006834	0.064859	-0.067197	-0.511808	0.384635	0.760962	0.550003	-0.046166	-0.125345	0.204961	-0.532261	-0.253184	0.049282	-0.474246	-0.130572	0.235569	0.237945	0.618108	0.297862	-0.426852	-0.215828
frg_14	-0.002931	-0.168828	0.13885	-0.472834	-0.048752	0.07718	-0.131229	0.196592	-0.455976	0.039944	0.03446	-0.120936	-0.319185	0.682678	0.467826	0.294397	-0.543487	0.163221	-0.780295	0.022831	-0.300849	0.117967	0.520866	0.000781	-0.320478	-0.349255	-0.110676	-0.403655	0.280377	-0.506784	-0.24994	-0.123454	0.504477	-0.093593	-0.096657	0.433493	-0.497133	0.050832	-0.111635	0.479937	0.052274	0.074659	0.238322	0.377774	0.003566	0.167294	-0.301673	-0.278215	-0.035649
frg_79	0.262846	0.542705	-0.077012	-0.563759	-0.469414	0.194598	0.125498	0.235175	0.040813	0.220197	-0.135378	-0.225309	-0.183621	-0.192976	-0.359061	0.286451	-0.075664	-0.069382	-0.479917	-0.274431	-0.32812	-0.157474	-0.018224	0.222255	0.435909	-0.659541	0.427642	-0.236615	-0.038017	-0.472831	-0.501979	0.245256	0.373707	0.402783	-0.369773	-0.193285	-0.952388	-0.232975	0.179521	0.029167	0.160385	-0.143569	0.283728	0.232883	0.304622	-0.177191	0.245115	-0.440729	-0.415075
frg_94	-0.705094	0.423175	-0.221499	-0.308535	0.139725	0.114487	-0.132317	0.453363	-0.51695	0.027518	0.265278	0.048819	-0.40403	0.15983	0.366107	0.203773	-0.357969	-0.130703	0.282377	-0.419475	-0.076371	-0.221323	0.379506	-0.182396	0.685474	-0.353356	0.187128	0.05489	0.200592	-0.198965	1.02805	0.169099	0.23082	0.157607	-0.17558	0.108049	0.302041	0.460093	-0.130894	0.100158	-0.752772	0.024557	0.57292	-0.370597	0.621626	0.098457	0.650517	-0.190056	-0.073687
frg_154	0.060513	0.010545	-0.026947	0.194131	0.31201	0.267436	-0.743431	-0.485908	0.766409	0.204413	-0.261139	0.189137	0.262002	0.171313	0.173986	0.037764	-0.124233	-0.430017	-0.321244	0.339387	-0.584052	-0.43847	-0.150984	-0.395273	0.232236	-0.418779	0.02331	0.544422	-0.067966	-0.544291	-0.087762	-0.63054	0.28532	0.544301	0.313964	-0.534783	-0.418253	0.442128	0.175567	-0.555623	-0.185392	0.121595	0.19363	-0.187576	0.377353	0.523574	0.075561	-0.286413	0.001841
frg_245	0.952394	-0.084831	0.433551	-0.527774	-0.077837	0.222894	-0.167977	-0.799657	0.271377	-0.265654	0.390649	0.098517	-0.080989	0.573637	0.358106	0.443719	-0.690379	0.019106	-0.09821	-0.428099	-0.518965	-0.411644	0.220679	-0.42127	-0.39617	-0.506059	0.271476	0.127511	-0.209547	0.087421	0.206581	0.328357	0.963577	0.573179	-0.150013	0.367218	-0.0131	-0.099284	0.021513	-0.181866	0.313455	-0.67926	-0.51485	0.411467	-0.501893	0.258281	-0.162996	-1.17931	0.009951
frg_83	0.116766	0.481212	-0.230079	0.349036	-0.576397	-0.755399	0.152842	-0.030305	-0.114258	0.244159	-0.002951	-0.202007	-0.35958	0.283201	0.31279	0.27442	0.099265	-0.220036	-0.077296	0.367802	-0.037697	-0.147127	0.677034	0.363873	-0.234802	-0.459988	0.247613	-0.159922	0.248334	-0.377826	-0.102749	0.095397	0.41714	-0.163091	-0.33716	-0.733677	-0.471763	0.078156	-0.163559	-0.097922	-0.069534	-0.200609	-0.202887	0.163476	-0.366613	-0.016079	-0.331693	-0.04252	0.404239
frg_70	0.003999	0.358928	0.465777	-0.451241	-0.459213	-0.1576	-0.30356	-0.145576	-0.40562	0.436198	-0.342002	0.068001	-0.225638	0.561218	0.692037	-0.29269	0.784101	0.064911	-0.154296	-0.363947	-0.406597	0.003065	0.739917	0.70516	-0.627499	-0.20979	0.746104	-0.885855	-0.078955	0.251816	0.271003	-0.154348	0.245472	-0.063129	-0.25191	-0.565963	-0.623998	-0.021777	0.225819	-0.417002	-0.366198	0.638792	-0.014213	0.319282	0.27143	-0.159809	0.046472	0.322812	0.385552
frg_293	0.106362	0.654265	0.578401	-0.397954	-0.527542	0.21776	-0.054887	0.138963	0.14947	0.186028	-0.00707	0.088758	0.029584	-0.57618	0.142062	-0.595658	0.12413	-0.54697	0.379387	0.281827	-0.863478	-0.480798	0.143434	-0.381694	0.080701	-0.146902	0.278836	0.07692	-0.03775	0.015198	0.269181	0.101538	-0.48001	-0.129418	-0.476176	-0.514555	-0.564443	0.119644	-0.011855	-0.170094	-0.501654	-0.048289	-0.503931	0.194518	-0.310567	0.204664	-0.202711	-0.06057	0.888616
frg_231	0.850284	0.072332	-0.059669	-0.071908	0.043472	-0.886846	0.057919	-0.051209	-0.331362	0.012358	0.083262	0.565871	0.60411	-0.037054	0.572583	-0.744199	0.504666	0.653298	-0.444096	-0.372554	-0.536935	-0.780714	0.402922	-0.339975	0.191964	-0.167122	0.026702	-0.37963	-0.282876	0.019433	-0.002501	0.082986	-0.466425	-0.335979	0.05336	-0.653875	0.100859	0.023478	0.06871	-0.144827	0.091588	-0.224648	0.53576	0.025836	0.274047	-0.284203	0.372516	0.175247	0.731575
frg_209	0.142988	-0.278413	0.405518	-0.082843	-0.02663	0.284634	0.423931	-0.212072	0.231483	-0.194647	0.000305	-0.091675	-0.087197	0.007637	-0.281651	0.987931	0.166298	-0.063372	-0.536918	-0.253564	-0.133064	0.313827	0.577278	-0.255727	0.186439	-0.81984	0.439878	0.231599	0.150215	-0.402993	0.345332	0.034618	0.53778	0.246032	-0.232321	-0.235935	-0.189862	0.491504	-0.853709	0.429764	0.263489	-0.181401	0.574625	0.405219	-0.371416	0.556673	-0.083761	-0.599105	0.010485
frg_96	-0.48036	0.302661	-0.064847	0.082471	-0.298063	0.421086	0.180139	0.010528	0.080163	0.365707	0.117631	-0.018866	0.040158	0.39474	0.058569	-0.29907	-0.65741	-0.348635	0.316374	-0.159491	0.200262	0.409496	0.047299	-0.028908	1.0741	0.068896	0.133185	0.621781	-0.119326	0.279521	0.428204	0.165151	0.222586	0.414814	0.119711	-0.649831	-0.586787	-0.299201	-0.237628	0.022505	-0.067443	0.638414	0.383654	0.165777	0.283369	-0.140803	0.255519	0.378608	-0.26569
frg_172	0.218683	0.190453	0.225488	-0.30206	0.565586	-0.014729	-0.712728	-0.353941	0.956672	0.079484	0.136982	0.319742	0.391657	0.145335	0.630062	0.428378	-0.375805	0.017943	0.136699	0.009327	0.026942	0.062093	-0.59234	-0.696688	-0.019321	-0.045072	0.280007	0.085314	-0.195779	0.564754	-0.078011	-0.853681	0.450643	0.559956	0.321015	-0.461637	0.317419	0.250849	-0.147737	-0.018249	-0.264984	-0.273507	-0.054509	-0.178716	0.718125	0.055774	0.213897	-0.25397	-0.422933
frg_133	-0.434509	0.702806	-0.063484	-0.128858	-0.015751	0.152707	-0.068394	-0.446115	-0.239381	-0.134544	0.459893	-0.142371	-0.121105	-0.151557	0.484988	-0.744823	-0.763763	-0.085771	0.367673	0.003654	-0.076016	0.669733	-0.352728	0.139395	0.390114	-0.351089	-0.037883	-0.576013	0.385866	0.016231	0.024474	0.210777	-0.047079	-0.079271	-0.045474	-0.427688	-0.794598	0.61437	0.806027	0.321602	-0.683217	-0.006637	0.23004	0.899071	-0.446761	-0.0393	-0.102884	-0.319346	-0.094871
frg_265	0.196178	0.098401	-0.901454	0.215831	0.074559	-0.648374	0.070243	-0.17857	-0.117893	0.424708	0.606477	-0.05787	0.272136	-0.050085	0.526329	-0.043335	-0.530699	0.471488	-0.555627	0.196699	0.324104	0.05574	-0.06259	-0.503178	-0.441656	-0.259912	-0.008913	0.185347	-0.459926	0.415429	0.470902	0.308641	-0.113815	0.677953	-0.193779	-0.300131	-0.380359	0.138459	-0.125218	0.055029	0.30487	-0.074036	-0.046367	0.508029	0.306771	-0.096919	-0.199408	0.57132	0.352076
frg_271	0.169638	-0.439454	0.721534	-0.425629	-0.953627	0.351174	0.361749	0.339541	-0.329666	0.333378	0.004006	0.819346	-0.359733	0.797209	-0.328031	-0.014058	0.014143	-0.042117	-0.147854	0.669503	-0.345047	0.644641	0.304208	-0.058139	-0.081683	-0.070271	1.23964	-0.170896	0.33272	0.151137	-0.766899	-0.250408	0.665444	0.258609	0.374898	-0.737224	-0.911072	-0.630543	0.671602	-0.092404	-0.448309	0.245553	0.700703	0.573527	-0.327296	0.427254	0.277273	0.209189	-0.084811
frg_8	0.078956	0.519975	0.259141	0.253318	0.316955	-0.392577	-0.42762	0.10491	0.325601	0.396791	0.132082	0.179274	0.601319	-0.466984	0.636165	-0.289368	-0.22722	-0.106857	-0.232472	0.121066	-0.140665	0.421493	-0.032839	-0.508083	0.213004	0.794503	0.26981	-0.573269	0.312175	0.443879	0.497505	-0.433609	-0.25189	0.276918	-0.466956	-0.651402	-0.598937	-0.027101	0.385199	-0.051956	-0.369776	0.063743	-0.157956	0.130369	0.182378	-0.794177	0.006425	-0.308534	0.049672
frg_23	0.59886	0.429555	0.028677	0.199112	-0.31022	-0.477115	-0.518117	0.084991	-0.496527	-0.715286	0.274286	-0.270745	0.371259	0.348498	0.45011	-0.238102	0.16592	-0.697731	-0.378736	-0.51666	-1.01562	0.376001	0.548161	0.066259	0.27699	0.543139	0.280418	-0.082493	0.483714	0.660536	0.27747	-0.120583	0.420716	-0.15045	0.461213	-0.245012	-0.36513	0.002321	-0.536588	-0.205308	0.064405	0.650254	0.147563	0.246757	-0.436176	0.113928	0.537398	0.431162	0.340416
frg_409	0.068193	0.646665	0.699887	-0.303912	-0.688241	0.143664	-0.242711	-0.11696	-0.188032	-0.200279	0.198394	0.254869	0.199179	-0.785041	-0.171839	-1.21351	0.305725	-0.668303	0.317643	-0.078516	-0.703938	-0.502928	0.677053	-0.390974	0.034958	0.106539	-0.170094	0.239305	0.43435	0.168261	0.513026	-0.605383	-0.388399	-0.155922	-0.471528	-0.641761	-0.200673	0.111389	-0.295607	-0.233856	-0.476549	0.64961	-0.690456	0.374529	-0.24345	0.363295	-0.242729	0.096858	0.620873
frg_98	0.018294	0.200473	-0.257128	-0.284903	-0.24071	0.065225	-0.057933	0.087043	0.605608	0.284959	0.270024	-0.336197	-0.157648	0.361394	0.22039	-0.075017	0.265244	0.21225	-0.162628	0.010682	-0.307955	0.234524	0.267456	0.120532	-0.521183	-0.28297	-0.58645	0.049331	0.334761	-0.500376	0.282807	-0.01677	0.269852	-0.237904	-0.313491	0.021389	-0.5586	0.249661	0.15106	-0.381868	0.274968	-0.328381	0.454556	0.376968	0.052305	-0.181781	0.026555	-0.107952	0.496112
frg_132	-0.001333	0.17832	-0.201142	0.127222	-0.574141	0.227664	0.06774	-0.019436	-0.052867	0.595309	0.102855	0.686872	0.886311	0.261775	0.000165	-0.698184	-0.220282	0.754045	-0.664656	0.226494	-0.142179	0.239162	0.539356	0.23307	0.666681	-0.509709	0.329479	0.70459	-0.359924	0.044383	0.160777	0.032737	0.46071	0.02565	-0.294768	-0.477929	-0.457299	0.014215	0.277131	0.570003	-0.045718	0.21478	0.474579	0.970412	0.469184	-0.073376	0.276363	-0.139068	0.113595
frg_108	0.48776	0.163461	-0.247962	-0.405291	-0.180946	-0.517985	0.307735	0.206673	-0.478536	-0.385123	-0.479633	0.045413	-0.302987	-0.088224	-0.303091	-0.346262	0.070233	0.195412	-0.179693	-0.348503	0.385799	0.057448	0.078309	0.773756	-0.29249	-0.220118	0.990432	0.011527	-0.647605	0.827397	-0.101233	0.645227	-0.293069	0.226883	0.209722	-0.310404	-0.813789	-0.915661	-0.150701	-0.05708	-0.420811	-0.236985	0.507821	-0.183042	0.709424	0.191087	-0.048063	0.385416	0.240345
frg_321	-0.591456	0.085996	0.333966	0.40604	-0.008347	-0.066544	-0.784746	-0.072154	0.519077	0.327465	-0.098434	0.201137	0.394133	0.190368	0.402958	-0.188669	-0.11132	-0.18761	0.231691	0.101327	0.302309	-0.340755	0.183547	-0.323742	0.159438	0.317629	0.175278	0.096884	0.000215	0.198979	-0.228046	-0.543223	-0.177971	0.385772	0.713435	-0.424346	-0.253208	-0.077219	-0.548761	-0.383309	-0.075301	-0.518398	0.106175	0.128313	0.724484	0.734973	0.893623	-0.231407	-0.423344
frg_260	0.601917	0.409772	-0.144863	-0.661697	0.225831	-0.343202	-0.061428	-0.36678	-0.773032	0.679604	-0.087314	-0.568642	-0.335505	-0.642337	-0.035095	0.023717	-0.409675	0.36588	-0.499606	0.646886	-0.149046	0.834486	0.5712	0.263906	0.120752	-0.599753	0.209792	0.792732	-0.248628	-0.404677	-0.373872	0.800208	0.941575	0.127247	0.080672	-0.186608	0.084861	0.243453	0.383169	0.060632	-0.899303	-0.403108	-0.465336	-0.323872	0.291064	0.062781	0.129868	-0.043339	-0.695016
frg_127	0.151544	0.297492	0.293975	-0.295929	-0.522549	0.645262	-0.101657	-0.022415	-0.556634	-0.124021	0.027958	0.474547	0.547576	-0.180417	-0.280881	0.21462	0.394331	-0.060877	0.030545	0.258101	0.065957	0.406967	-0.032874	-0.119742	0.697568	0.356484	0.556782	0.222227	-0.843468	1.0617	-0.282155	-0.476489	-0.002511	0.561339	-0.920971	0.251881	-0.991026	-0.095929	0.420253	0.115958	-0.609785	0.297865	-0.394318	0.210887	0.177424	0.060522	0.723501	-0.209103	0.49045
frg_328	0.551383	0.455464	-0.213332	0.125896	-0.085841	-0.317306	-1.07708	-0.268522	-0.270034	0.219993	0.168903	-0.385632	-0.18805	0.849784	-0.215242	-0.057472	0.447595	-0.385631	-0.400815	-0.103474	-0.577965	0.176808	0.251295	-0.093478	0.068832	-0.040946	0.090741	-0.197004	0.510053	0.716921	0.134231	-0.638458	0.312841	0.118507	0.933622	-0.047636	-0.592316	0.26793	0.05122	-0.02607	-0.168291	-0.175986	-0.260618	0.404975	-0.206551	0.27942	0.499457	0.480215	0.968396
frg_228	0.204135	0.406198	-0.082115	-0.023661	0.255982	-0.175958	-0.409053	0.119052	-0.28445	0.252582	-0.131798	-0.111555	-0.285226	-0.187485	0.714531	-0.436659	0.446447	0.663691	0.263363	-0.102095	-0.031934	0.48161	-0.095652	-0.378132	-0.254161	0.018156	0.535021	-0.018877	0.322051	0.538387	0.218703	-0.360174	0.593986	0.134123	0.213299	-0.281788	-0.103195	0.04278	0.300982	0.125861	-0.120543	-0.182588	-0.157632	0.337664	-0.49309	-0.139566	-0.641524	0.268265	-0.590896
frg_164	0.076595	0.321259	-0.081175	-0.083818	0.334785	-0.63959	-0.193103	0.047335	-0.032054	0.256666	-0.049183	0.041504	-0.196262	-0.568173	-0.316296	-0.13058	0.225555	0.208162	0.094372	-0.336559	-0.206716	0.039937	-0.152611	-0.323894	-0.397383	0.151692	0.831586	0.057724	0.510794	-0.034443	0.598143	-0.341079	0.119141	-0.538878	-0.601886	-0.552938	-0.360193	0.526988	0.060374	-0.115284	-0.076671	0.108132	-0.032641	0.69678	0.203989	0.458394	-0.578188	0.687671	-0.099851
frg_51	-0.087911	-0.24337	0.853525	0.02912	-0.753022	-0.116059	0.27973	0.455968	0.491688	0.272837	0.329782	0.075834	0.254528	0.17003	0.04272	0.101463	-0.130667	-0.157252	0.573704	0.026045	-0.371758	-0.257935	0.426764	0.139439	0.321685	0.33557	0.509627	-0.048432	-0.071327	0.510554	-0.33194	-0.145371	0.317015	-0.530032	-0.550447	-0.141076	-0.265584	-0.093357	-0.135944	0.215531	-0.247777	0.066749	0.011344	0.319005	-0.094602	0.164291	0.333139	-0.360719	0.384928
frg_110	0.296532	0.091789	-0.146874	-0.23411	0.504166	-0.482003	-0.322777	0.165699	0.110594	0.372193	-0.713498	0.122998	-0.407384	-0.781769	0.343168	-0.02115	0.160282	-0.137163	0.006756	-0.60522	0.103826	-0.068623	0.015954	-0.200099	-0.337389	0.355805	0.133961	0.137301	0.493774	0.450045	0.064362	-0.340924	0.216094	-0.249556	-0.331165	-0.628457	-0.477341	0.036648	0.038686	-0.157902	-0.515097	-0.102454	0.152755	0.554073	0.02831	0.432415	-0.282222	0.21588	-0.063383
frg_58	-0.129831	0.444808	-0.131133	-0.283958	0.057621	-0.116387	-0.430362	0.205483	-0.075767	0.041729	-0.002451	-0.033111	0.101708	0.237404	-0.209055	-0.235045	-0.114569	-0.142378	0.167381	0.14169	-0.112936	0.055056	0.19414	-0.171649	0.557968	0.231735	0.026943	0.125954	0.049802	-0.022075	0.06472	0.510052	0.431262	0.097489	0.104766	-0.547618	-0.024283	-0.095902	-0.373234	-0.237553	-0.384853	0.926639	0.399582	0.182715	-0.303565	-0.06665	0.206422	0.104537	-0.185906
frg_340	-0.169677	-0.35577	-0.340665	0.39379	-0.770256	1.52555	-0.283175	-0.071696	-0.621494	0.932919	0.959812	-0.236698	-0.017725	-0.702617	0.991904	0.552524	-0.380948	0.237069	0.081171	-0.107849	-0.199631	0.032194	0.178451	-0.484691	-0.922662	-0.11837	0.339714	0.492934	-0.332742	0.500286	0.170223	0.205469	-0.509217	-0.046149	0.773215	0.858136	0.445901	0.7825	0.151098	0.436581	-0.003357	-0.08604	0.056327	0.82263	-0.386781	0.673763	0.743118	0.584152	0.342118
frg_67	0.141065	-0.117358	-0.027807	-0.418184	0.189762	0.61636	-0.765957	-0.374013	-0.278411	0.31715	-0.170782	0.220642	-0.517969	-0.280626	0.286933	0.045933	-0.336567	-0.131514	-0.455524	0.197451	-0.170627	0.521199	0.989623	-0.269834	0.191109	0.732064	0.544047	-0.369065	0.702703	0.03618	0.203561	0.103815	0.048258	-0.735487	0.464162	-1.07777	-0.319128	0.040109	-0.407818	-0.248549	-0.111685	0.630775	-0.025674	0.311493	-0.485418	-0.078994	0.216366	-0.297992	0.066597
frg_64	0.507164	0.377773	0.029729	-0.581405	-0.264666	-0.688051	0.040602	0.45143	-0.079875	0.509493	-0.335937	0.309228	-0.11668	0.878371	-1.12808	-0.060261	-0.520629	0.444749	-0.286787	0.641281	-0.294577	0.274041	0.149852	0.049361	-0.099209	-0.109012	-0.51191	0.212777	0.271512	-1.10265	0.127197	0.562847	-0.042236	-0.201524	0.154384	-0.05951	-0.089918	0.322561	0.338627	0.336515	-0.706098	0.530801	-0.561261	0.069582	-0.119018	0.890722	-0.120244	-0.085554	-0.306592
frg_55	0.304952	0.483198	-0.71191	0.171192	-0.340059	-0.12469	0.316512	-0.003206	-0.250489	0.793872	0.036491	-0.001003	0.049653	0.291217	0.268155	-0.208889	-0.261997	-0.310676	-0.121009	-0.487621	-0.236076	0.164289	-0.023596	-0.474923	0.18762	-0.446109	0.471283	-0.669262	-0.120817	0.53693	0.256351	0.243182	0.109584	0.324137	0.120901	-0.465035	0.107217	0.601266	0.275206	-0.022275	-0.422133	0.02844	-0.036932	0.116198	-0.216152	0.235359	-0.352695	-0.110935	0.380369
frg_590	-0.500266	0.511974	0.348403	-0.233171	-0.677945	0.346528	0.090022	0.184666	0.364907	-0.958953	0.237137	0.396862	-0.372717	0.127069	0.066481	-0.111414	-1.21994	-0.120268	-0.067718	0.111021	-0.200589	-0.329093	0.349412	-0.608524	0.584632	-0.072582	0.517475	0.083536	-0.170881	-0.201025	0.07405	0.259996	0.450467	0.419543	0.410657	0.085799	-0.401927	-0.631096	-0.119759	0.888752	-0.553781	-0.075671	0.337213	0.978393	-0.179481	-0.027421	-0.018137	-0.425258	-0.009966
frg_169	-0.154021	-0.308585	0.25563	-0.926755	-0.112537	0.220409	0.088718	0.516516	-0.501746	-0.532909	0.924379	0.191609	-0.44881	0.477844	0.533643	0.292197	-0.20413	0.450361	-0.561022	-0.308521	0.091656	0.220181	0.398032	0.34391	0.433522	-0.116608	-0.555761	0.143976	0.208783	0.074884	-0.127552	0.618701	0.352649	0.219652	-0.207194	-0.290431	-0.535827	-0.340652	-0.264063	0.521026	0.139025	0.349927	0.712449	0.680203	-0.140499	-0.076108	-0.126069	0.105192	0.033331
frg_166	0.31008	-0.011692	-0.53258	0.043991	0.237845	-0.12855	-0.28725	0.211574	-0.025812	0.592215	-0.08645	0.039476	0.174571	-0.953312	-0.188545	-0.146808	0.051069	-0.084733	-0.099627	-0.055208	-0.36017	0.121157	-0.031027	-0.251548	-0.29693	0.353343	1.04633	0.032343	0.201181	-0.076901	0.524836	-0.048381	0.603471	-0.657017	-0.541156	-0.36145	-0.3811	0.861754	0.075132	-0.18125	0.257938	0.165678	-0.366315	0.748544	-0.121899	0.221914	-0.682043	1.00829	-0.247871
frg_73	-0.145689	-0.295804	0.039455	-0.374489	-0.141264	0.291267	-0.124152	-0.456359	0.387191	0.785481	0.083782	-0.196741	-0.094736	0.028424	0.364076	-0.260573	0.162133	0.048407	-0.438445	-0.292808	-0.21842	0.414492	0.133407	-0.006	-0.143893	-0.250746	0.013312	0.697339	0.377452	0.098964	-0.350442	-0.481844	-0.169896	-0.675542	-0.274609	-0.276861	-1.32419	0.464328	0.603023	-0.134326	-0.004357	0.585131	-0.334274	0.767288	0.261269	-0.216549	0.03253	-0.284724	0.40093
frg_105	0.236052	0.159097	-0.465668	0.029023	-0.315252	-0.17837	0.352881	-0.180456	0.028108	0.957721	0.085328	-0.183738	-0.261785	0.011047	0.078647	-0.130606	-0.081353	0.007998	-0.254726	0.091599	0.038033	0.375099	0.345791	0.076599	0.256607	-0.675335	0.497495	-0.545999	-0.156482	-0.125021	-0.117561	0.45604	0.208013	-0.291092	0.108038	0.157604	-0.13186	0.249133	-0.41551	-0.016921	0.428021	0.041899	0.481858	-0.167567	-0.224279	-0.049799	-0.406212	0.317085	0.236079
frg_165	0.09332	-0.071736	-0.184234	-0.432777	0.05246	-0.167476	-0.279123	-0.028174	-0.111349	0.558486	-0.110788	0.042863	-0.220656	-0.703665	0.471225	-0.089967	0.002153	0.00161	-0.26141	-0.472468	0.308645	-0.13572	0.229254	-0.358367	-0.050171	0.197717	0.075794	-0.32803	0.591867	0.61789	0.216292	-0.045014	0.432763	-0.273623	-0.565038	-0.571193	-0.31024	0.276515	0.093192	-0.278483	-0.163478	-0.078594	0.134324	0.359214	0.037491	-0.050023	-0.424302	-0.01356	-0.142799
frg_262	-0.245275	-0.034751	-0.271825	-0.372046	-0.268578	-0.542401	-0.257029	0.578856	-0.681244	0.101108	0.206253	-0.471308	-0.267983	0.797057	0.010186	-0.276285	-0.320799	-0.152794	0.384453	0.529987	0.182543	-0.242359	0.450737	-0.238021	0.370799	-0.791111	0.131695	0.730744	-0.634562	-0.99261	-0.150036	-0.329271	-0.051407	-0.194426	-0.098804	0.780236	-0.608508	0.178353	0.723717	0.106428	-0.56669	0.087334	0.613872	0.446051	0.660835	0.51012	-0.078377	0.513638	-0.044589
frg_256	0.268366	0.847637	-0.462362	0.008084	0.100718	0.097037	-0.207586	0.177047	-0.348749	0.853643	-0.147174	-0.078871	-0.975246	-0.325038	0.10587	-0.061219	0.330584	-0.187495	-0.286674	-0.497749	0.697437	0.311618	-0.087953	-0.282598	-0.562267	0.467255	0.642629	0.640746	0.195683	0.399604	0.307497	-0.635367	0.27224	0.033213	-0.263081	-0.102964	-0.186985	-0.076883	0.316467	-0.108165	-0.323854	-0.704269	0.099032	0.52797	-0.100671	0.605696	-0.272916	0.601544	0.149444
frg_9	0.060273	0.307968	0.002573	0.381128	0.373134	-0.205479	-0.307031	-0.214237	0.378882	0.244507	0.018643	0.090694	0.316367	-0.409021	0.686635	-0.560239	-0.368962	-0.100615	0.05568	-0.119594	-0.310416	0.150835	0.237581	-0.504796	0.13286	0.236416	0.321735	-0.712718	0.29322	0.28556	0.533207	-0.236341	0.035365	0.1903	-0.214113	-0.651034	-0.53557	-0.074512	0.19144	0.037272	-0.400866	0.291241	-0.2098	-0.042185	0.049647	-0.675842	-0.140273	-0.238688	0.072489
frg_178	0.270241	0.433008	-0.339955	-0.445656	0.407699	-0.714095	-0.058546	0.110041	-0.369731	0.225118	-0.151927	0.205932	0.064398	-0.503504	-0.554721	-0.084175	0.156569	0.240232	-0.043954	0.320402	-0.307033	-0.052018	0.47778	-0.493723	-0.822006	0.151504	0.740363	0.641972	0.375028	0.632289	0.637938	-0.242138	0.396599	-0.995269	-0.28943	-0.734376	-0.599868	0.29115	-0.287254	-0.078709	-0.446672	-0.256145	0.130286	0.519709	-0.200333	0.737247	-0.138409	0.236183	-0.321929
frg_333	0.181445	0.234772	-0.395576	0.141185	-0.703317	0.414897	-0.179439	0.057586	-0.244182	0.108213	0.506947	0.712874	-0.103216	0.633797	-0.401026	-0.523059	-0.596017	0.35919	-0.688406	0.548915	0.239211	-0.215281	-0.652442	0.191777	1.00895	-0.258177	0.184821	0.210754	0.025955	0.464575	-0.223726	0.012072	0.032844	0.097624	-0.050009	0.14181	-0.701704	-0.248068	-0.069427	-0.254263	-0.244051	0.478533	0.206877	0.850533	0.284056	-0.360087	0.131905	0.375931	0.155778
frg_149	0.680193	0.159867	-0.187613	-0.360829	-0.35927	-0.850496	0.159334	-0.125248	0.094265	0.4111	0.051494	0.022338	0.30426	-0.017023	0.817099	-0.364599	0.562503	0.396102	-0.089968	0.212646	-0.863217	0.566182	-0.208966	-0.306266	-0.608784	0.077906	-0.15432	0.109617	-0.328462	0.349825	0.395426	0.171026	-0.414013	0.010255	-0.619591	-0.047254	0.049919	-0.090572	0.165839	-0.250821	0.164526	-0.059997	-0.09057	0.706269	-0.365431	0.244824	0.616873	0.163054	0.732827
frg_92	0.758211	0.16262	0.005482	0.178962	-0.528475	0.389031	-0.912296	0.090543	-0.355726	0.475952	-0.07984	0.751969	0.626485	0.441872	-0.404447	0.076225	-0.416909	-0.094024	-0.081604	0.024957	0.194901	-0.075103	0.517467	-0.442599	0.065124	-0.077754	0.069307	-0.772589	-0.831863	0.238699	-0.073796	0.200435	0.119477	0.702418	-0.323282	-0.07652	-0.846048	-0.364185	-0.224807	-0.26624	0.007243	0.33294	0.373593	0.147438	0.374756	0.344814	0.219459	-0.181294	0.334615
frg_22	0.487872	0.089221	-0.105371	-0.118705	-0.400677	-0.266746	-0.523206	-0.153911	-0.267264	-0.196788	-0.113684	-0.399854	0.212308	0.360924	0.552624	0.103802	-0.223191	-0.76488	0.072958	-0.499309	-1.06893	0.170792	0.610171	-0.109186	0.238885	0.570795	0.556324	-0.26921	0.770188	0.833338	0.518711	-0.55932	0.582049	-0.067266	0.345344	-0.472585	-0.460692	0.177006	0.206506	-0.468199	0.00074	0.501625	-0.021529	0.26376	-0.391765	0.035144	0.473915	-0.057804	0.538269
frg_263	-0.51545	0.223524	-0.286181	0.011977	0.050295	0.0451	-0.197322	0.20554	-0.336536	0.364453	-0.206967	-0.382111	-0.088518	0.945786	-0.333052	-0.336909	-0.091545	-0.410739	0.31359	0.592261	0.388776	-0.260924	0.915468	-0.132202	0.223942	-0.742105	0.038621	0.925143	-0.654879	-1.09669	-0.211362	-0.374846	-0.274492	0.100364	-0.050335	0.662661	-0.564467	0.085009	1.16234	-0.306535	-0.596514	0.304508	0.195018	0.299768	0.974384	0.742935	0.288259	0.746108	-0.068515
frg_168	0.55539	0.810008	-0.342613	-0.051256	0.004832	-0.060916	0.456905	-0.006083	-0.873369	0.390356	-0.211827	-0.131656	0.298259	-0.084842	-0.130575	-0.365599	0.094664	0.319804	0.380498	-0.031865	-0.365397	0.415158	0.096847	-0.41504	-0.184028	-0.35162	0.027037	0.103502	0.574667	0.334412	0.014519	0.620223	-0.107556	-0.213432	-0.521489	-0.473749	-0.196505	-0.078552	0.960371	-0.024564	-0.686902	0.056552	-0.183782	0.467878	0.165184	0.099608	0.148899	-0.658965	-0.629781
frg_269	0.457088	0.574	-0.304763	-0.2577	-0.090793	-0.510337	-0.503649	0.324491	-0.237694	0.29345	-0.15679	0.282507	-0.010338	-0.033464	0.396788	0.051039	-0.515154	0.592257	-0.11853	0.35192	0.065848	-0.235154	0.301289	-0.351193	-0.515372	-0.396519	0.177149	-0.046939	0.163084	0.067488	-0.164946	0.655889	0.009244	0.152365	0.189058	-0.577075	-0.048999	-0.059108	-0.280668	-0.15198	-0.144502	-0.105447	0.218242	0.189301	-0.263002	-0.295455	0.091235	-0.08096	0.326667
frg_107	0.313773	-0.07154	-1.00159	0.166563	-0.193968	0.049776	-0.673976	0.405958	-0.001206	-0.003036	0.043856	-0.524085	-0.364666	0.77312	0.012759	-0.222452	0.478878	0.505816	-0.468203	-0.001279	-0.661555	-0.182698	0.086067	0.234572	0.545148	-0.490312	0.040149	0.319431	-0.433308	-0.523751	0.057796	0.127781	0.565321	-0.098661	0.596304	-0.361142	-0.43291	0.282175	-0.66346	-0.084749	0.004287	0.246766	-0.27376	-0.459176	0.172957	-0.291043	0.084827	0.019406	0.291939
frg_356	0.506243	0.184243	-0.180989	-0.244641	0.493331	-0.220411	0.191164	0.568898	-0.374956	0.493624	0.204365	-0.659359	-0.635438	-0.749625	0.239455	0.344604	-0.547915	0.541494	-0.787541	-0.180111	0.5112	0.718005	0.388278	-0.213364	0.091113	-0.146672	0.512981	-0.175874	0.188553	0.824974	0.106839	-0.25476	0.313738	-0.409819	-0.237567	0.080636	-0.156199	-0.219193	1.13147	0.209351	-0.704439	0.408974	-0.03736	0.468504	-0.039824	-0.467951	-0.219603	0.216747	-0.032351
frg_514	0.373145	0.215897	-0.141323	0.586026	-0.082227	0.795862	-0.698185	-0.100483	0.210704	-0.548029	0.007081	-0.379679	0.029795	0.347527	-1.20815	0.1834	-0.193898	-0.335659	-0.737727	0.402603	-0.569155	-0.144503	-0.419803	-0.363707	0.1938	-0.38982	0.052213	-0.138704	0.069601	0.672561	-0.312705	-0.73011	0.642271	0.271227	0.295333	-1.1765	-0.110747	0.202466	-0.875787	0.139201	-0.486684	0.185334	-0.060566	0.020695	0.446741	0.361987	0.900661	0.596868	0.34877
frg_238	-0.551389	0.674372	-0.47033	0.240617	-0.075592	0.451332	-0.772137	0.181577	0.068339	0.198189	0.681469	0.302038	-0.01514	0.711164	-0.623344	0.328706	0.09211	-0.214412	-0.340385	0.430871	-0.075832	-0.357048	0.23615	0.288262	-0.163752	-0.563283	0.434045	-0.527932	-0.759778	1.16004	0.052424	0.33316	0.014392	0.870748	0.30023	0.009906	-0.093615	-0.496139	-0.703588	-0.067541	-0.283672	-0.255389	0.208351	0.100488	0.634356	0.288337	0.491469	0.731034	-0.223848
frg_360	0.451744	0.526714	-0.58778	0.387769	-0.117577	-0.265779	-0.496166	-0.266204	-0.228013	-0.089747	0.503968	-0.949472	0.12183	0.911245	0.39935	0.023453	0.161004	-0.341999	-0.813007	-0.567013	-0.853857	-0.120941	0.36813	-0.179692	0.052596	0.067409	0.381236	0.143887	0.164728	0.703675	0.493306	0.083004	0.013621	0.448602	0.501003	-0.004105	-0.747391	0.233681	0.188388	-0.051067	-0.073204	-0.279326	-0.267023	0.380217	0.100322	0.424382	0.277426	0.383139	0.456076
frg_80	0.862225	0.180121	-0.164779	-0.137377	-0.647249	0.068801	-0.141011	0.505388	-0.814349	0.455849	-0.47912	0.126559	-0.627821	0.086625	-0.126887	-0.286964	0.044901	-0.081207	-0.409568	-0.153495	0.032136	0.328593	0.146352	0.165838	0.261517	-0.194263	0.417738	-0.410415	0.365201	0.339415	0.073771	0.231929	-0.239708	0.174782	0.287897	-0.490667	0.134757	0.07623	0.045735	-0.069348	-0.430205	0.110424	0.280352	0.508617	-0.649585	0.011328	0.197656	-0.301923	-0.055049
frg_124	0.493183	0.095798	0.100075	-1.14164	0.498424	-0.367393	-0.201282	0.553316	-0.404956	0.243154	-0.382068	0.356735	-0.517665	-1.09957	0.669366	-0.34404	0.446964	0.051554	-0.288289	-0.33593	-0.165234	-0.27148	0.506606	-0.187768	-0.535559	0.329124	0.24976	-0.198538	0.981371	0.900024	0.373663	0.348812	0.597057	-0.342326	-0.371224	-0.520583	-0.204129	0.628084	0.141932	-0.004347	-0.515712	-0.015466	0.56746	0.667605	-0.50057	0.057754	0.241502	-0.272821	-0.360483
frg_19	0.137123	-0.210262	0.154383	-0.467056	-0.053917	0.818644	0.023764	-0.353927	0.213154	0.784133	0.431498	0.224348	0.232585	-0.645182	-0.108696	-0.513253	-0.388336	-0.576124	1.2008	-0.288077	-0.512803	0.427959	0.604956	-0.225222	0.36094	0.27375	0.370327	-0.571009	-0.368847	0.431977	0.240878	-0.052783	0.400575	-0.168683	-0.211069	-0.688486	-0.035238	0.421952	-0.345381	-0.399577	0.135028	0.183561	0.31314	-0.08894	0.704114	-0.107636	0.129326	-0.21374	0.550608
frg_308	0.888829	0.740513	0.076622	0.134728	0.059618	0.474219	0.535167	0.118847	-0.096128	0.065271	-0.013892	-0.095753	0.498361	0.698305	0.3251	-0.234688	0.04732	0.101712	0.185608	0.068492	0.314915	0.408876	0.241512	0.301503	0.138394	0.011621	-0.180496	0.65945	-0.507384	-0.36349	0.037781	-0.007496	0.031843	-0.13918	0.126295	0.1168	-0.088598	0.093044	0.411862	-0.545703	-0.153782	0.024732	0.129957	0.507487	0.44165	0.349534	0.215483	0.133572	0.358915
frg_141	0.036684	0.40401	-0.437095	-0.105987	0.502749	-0.705403	-0.216831	0.106293	-0.182615	0.275984	0.118135	0.274417	0.127272	-0.305447	-0.683783	-0.371569	0.355382	0.538086	-0.098429	0.090649	-0.478235	-0.112594	0.051491	-0.14732	-1.19287	0.088268	0.709863	0.91025	0.475619	0.306077	0.541481	-0.220451	0.110461	-0.905134	-0.047252	-0.350799	-0.388555	0.513214	-0.411671	-0.117278	-0.355624	-0.238729	-0.206892	0.626003	0.034761	0.792316	-0.400848	0.578822	-0.471272
frg_368	-0.099122	0.151776	0.217914	-0.025559	-0.844489	0.177403	0.592196	0.003793	-0.261074	0.074368	0.072863	-0.505266	-0.023612	0.598423	-0.008514	-0.031916	-0.457038	-0.232261	0.109855	-0.092544	-0.049503	-0.180959	0.245254	0.008724	1.13225	-0.506667	0.001423	0.802125	-0.021293	-0.01709	0.091303	-0.276473	0.258975	0.17844	0.562863	-0.109189	-0.312874	-0.360917	-0.087528	0.591087	-0.572103	0.126087	-0.062603	0.91041	0.192184	0.033482	0.074504	-0.159193	0.129243
frg_259	0.266613	0.399853	-0.108781	0.333777	-0.158032	1.10025	0.398551	-0.334087	0.075647	-0.670462	-0.639302	0.16312	-1.12776	-0.241551	-0.22703	0.859249	-0.932545	-0.294638	-0.093913	0.235597	0.947511	-0.045631	0.674382	-0.95862	-0.260959	0.034661	0.828015	-0.62454	-0.229462	-0.210019	0.165329	0.125498	0.843721	0.083342	-0.359884	-0.305829	-0.30729	0.312806	-0.701662	1.12685	0.406507	-0.114227	0.12144	0.874731	0.24526	0.72594	0.020408	-0.40008	0.516122
frg_377	1.00789	0.413067	0.138014	0.265516	0.161989	0.51935	0.509867	0.199193	0.207916	-0.189269	-0.08057	0.109202	0.664371	0.591547	0.561341	-0.231155	0.152096	0.220351	0.318781	-0.097139	0.46707	0.661056	0.289761	0.217306	0.250135	0.171916	-0.132298	0.592259	-0.528906	-0.197961	0.107998	0.109161	0.035422	-0.149207	0.183804	0.113308	-0.143627	0.07197	0.530965	-0.712439	-0.082908	0.12204	0.215362	0.536229	0.797915	0.254849	0.368503	0.233761	0.304897
frg_142	-0.176001	0.442561	-0.267432	-0.087026	0.014941	-0.91744	0.229491	-0.248517	-0.407345	-0.422954	0.13478	0.065576	0.304063	0.537532	-0.181823	-0.43448	0.274932	0.046772	-0.185584	-0.252338	0.141275	-0.178281	-0.659787	0.250493	0.367658	0.156296	0.788912	0.548188	-0.1841	-0.22306	0.419834	0.242168	-0.214624	-0.423532	0.29069	-0.127397	-0.805975	0.012244	0.171444	-0.085153	-0.610114	0.173275	0.375035	0.018573	0.473613	-0.138535	0.091448	0.329752	-0.220123
frg_375	0.270925	0.729963	0.537107	-0.047034	-0.397567	0.36747	-0.35427	0.028432	0.279781	-0.292897	0.413399	0.66361	0.130962	-0.928589	0.241427	-1.08373	-0.000311	-0.278585	0.136125	0.220004	-1.04507	-0.263906	0.31768	-0.481643	0.436438	0.159225	0.196712	0.60671	0.074958	0.577299	0.359518	-0.687066	-0.566176	0.215139	-0.474603	-0.742754	-0.558112	-0.609527	-0.613435	-0.467579	-0.114358	0.352045	-0.823493	0.141262	0.320285	0.14601	-0.153316	-0.020498	0.314979
frg_167	0.460951	0.542403	-0.457948	-0.372281	0.19451	-0.58024	-0.152416	-0.075962	0.097944	0.293511	-0.213088	0.319367	0.14889	-0.740957	-0.240396	-0.204983	0.553819	0.417905	-0.046093	-0.13758	-0.185535	0.220501	0.206683	-0.679967	-0.31695	0.282485	0.687125	0.382842	0.105964	0.386263	0.714834	-0.607548	0.013835	-0.723204	-0.276201	-0.675047	-0.585702	0.464102	-0.262079	-0.08093	-0.250043	-0.057297	-0.028171	0.685285	-0.154209	0.42735	-0.164547	0.323345	-0.048772
frg_144	0.223544	0.427169	-0.413199	0.009885	-0.114328	-0.346292	-0.783471	-0.329273	-0.106384	-0.205012	0.018531	-0.243095	0.14641	0.328044	0.529292	-0.026966	-0.172463	-0.555698	-0.519457	-0.393089	-0.675424	0.366614	0.231827	-0.155261	0.136874	0.326306	0.15935	0.243815	0.67271	1.18409	0.629907	-0.568678	0.085496	-0.279032	0.762438	-0.5381	-0.529708	0.163671	0.031905	-0.281479	-0.025159	0.702738	-0.211654	0.163089	-0.096062	0.021436	0.185695	0.410887	0.289746
frg_264	-0.313154	0.252903	0.112566	-0.076062	-0.930204	-0.124803	0.393752	-0.516127	-0.33084	-0.547989	0.761545	0.285104	-0.683916	0.576717	0.196585	0.007117	0.17865	0.156083	-0.220614	0.434283	-0.288473	-0.548719	0.103071	-0.104802	-0.678626	-0.433796	0.497846	-0.334713	-0.942036	-0.134627	0.681883	-0.10481	-0.669025	-0.007095	-0.634044	-0.049591	-0.55689	-0.570858	0.259308	0.497182	-0.36138	0.21887	-0.463384	0.711528	-0.049042	0.058829	0.233194	-0.234522	0.830417
frg_275	1.06074	0.46835	0.019992	-0.797264	-0.07075	-0.328735	-0.271344	0.264841	-0.90096	0.59313	-0.207733	0.219452	0.073182	-0.447788	-0.342103	-0.088995	0.278829	0.130535	-0.690423	0.022091	-0.203543	0.434131	-0.175068	0.209272	-0.337353	-0.674828	0.8772	-0.537355	0.832159	-0.131681	0.498464	0.054698	-0.133282	-0.079693	-0.282237	-0.909597	0.087294	0.44541	0.121159	-0.059681	-0.687546	0.094954	-0.136994	0.489308	-0.736761	0.20589	0.265681	-0.35204	-0.093719
frg_352	-0.06444	-0.10189	-0.264638	0.212953	0.235574	0.534184	-1.00845	-0.105603	0.583082	0.039982	-0.410374	-0.763171	-0.12281	0.208607	0.04503	-0.300638	0.626374	0.535165	-0.977387	0.426776	-0.520824	-0.477831	-0.639406	0.215932	-0.19279	-0.633037	0.130978	0.750647	-0.251281	-0.278297	-0.473937	-1.02983	0.712451	0.532721	0.092712	-0.464866	-0.488203	0.56084	-0.20541	-0.576004	-0.79818	0.62256	-0.499144	-0.263646	1.2062	0.511607	0.001751	-0.082955	-0.935494
frg_140	0.325072	0.827076	-0.50494	0.037006	0.197921	-0.862165	-0.608391	0.239721	-0.047564	0.209483	-0.39639	0.598552	-0.005328	-0.450729	-0.523324	-0.439447	0.827391	0.207151	0.074556	-0.158383	-0.714577	0.085714	0.132812	-0.436258	-0.835747	0.112048	1.13723	0.778297	0.167983	-0.092363	0.976883	-0.410924	-0.003207	-0.882295	-0.189726	-0.512555	-0.447135	0.709295	-0.274264	-0.198981	-0.163103	-0.159614	-0.036076	0.562341	-0.168306	0.752463	-0.188743	0.836569	-0.420681
frg_351	-0.067858	-0.125979	0.586224	-0.0357	0.563918	0.515783	-0.674795	0.281469	0.714566	1.23087	0.08029	-0.05978	-0.131736	-0.338972	0.148465	0.177684	-0.483908	0.159121	-0.650377	-0.322546	-0.116981	-0.209211	0.004216	0.075937	-0.20816	-0.298065	0.736947	-0.064144	-0.277442	0.979533	0.459635	-0.674292	-0.127911	0.543661	0.690297	0.771033	0.427233	0.596898	-0.454534	-0.250996	-0.136864	-0.665222	0.155119	0.49694	0.409074	-0.4046	0.107505	0.423068	0.851131
frg_294	-0.016813	0.983204	1.04779	0.00147	-0.405536	0.343434	-0.446119	-0.321611	0.539223	0.254859	0.355591	0.251099	-0.084795	-0.59795	-0.037866	-0.703489	0.209024	-1.17137	0.453486	0.90272	-1.31439	-0.649784	0.039375	-0.645807	-0.276282	-0.118161	0.144371	0.588585	-0.289876	0.206453	0.64652	-0.636877	-0.090232	-0.177183	-0.480608	-0.716401	-0.267318	0.566059	0.026619	-0.480087	-0.276955	0.224681	-1.08035	0.036864	-0.04036	0.885162	-0.050376	0.411873	0.687026
frg_119	-0.115406	0.340302	-0.665057	-0.483377	-0.108347	-0.148707	-0.147498	0.170364	0.160146	0.238186	-0.146639	-0.155582	0.103822	0.040793	-0.149472	-0.25407	-0.417896	0.531779	-0.396164	0.140211	0.305214	0.384669	0.518591	-0.011868	0.27617	-0.45272	-0.022672	0.316824	0.005055	-0.145512	-0.007419	0.251309	0.273359	-0.134933	-0.300525	0.399315	-0.424281	-0.168586	-0.053771	-0.221624	-0.133093	0.451575	0.42637	0.488777	0.127174	0.312363	-0.349401	-0.166486	0.456049
frg_301	0.432203	0.278039	-0.140382	-0.745672	0.001854	0.121097	0.048914	0.209939	-0.038491	-0.003271	-0.233123	-0.061431	0.174179	0.251149	0.212372	-0.137283	-0.686229	0.182588	-0.47914	-0.14456	-0.104084	0.359118	0.205586	-0.393709	0.308315	-0.638103	0.132002	-0.255494	0.070901	-0.828393	-0.794631	0.080627	0.990997	-0.081239	-0.609799	-0.353481	-0.834661	0.188523	0.669466	0.160934	0.137382	0.475091	0.264452	0.581802	-0.428693	0.100509	0.166071	-0.288839	-0.056436
frg_354	-0.181393	0.434388	-0.367813	-0.487001	0.67649	-0.446949	-0.324567	0.424927	-0.014036	0.167613	0.143091	-0.043429	-0.238533	-0.479915	-0.654001	-0.081565	0.350572	-0.270549	-0.195109	0.765399	-0.43623	-0.076379	-0.019439	-0.567631	-0.779516	0.313523	0.738746	0.986113	0.33014	-0.132831	0.6024	-0.643672	0.699784	-0.895145	-0.130425	-0.393893	-0.055975	0.506982	-0.398354	0.354998	-0.687461	-0.38234	0.077978	0.417732	0.191874	0.825895	-0.439399	0.905212	-0.540075
frg_266	0.012611	-0.382988	-0.325109	-0.277416	-0.697485	-1.01776	-0.012516	0.183355	-0.322668	0.1361	0.450271	-0.360613	0.864013	0.318983	0.649937	0.245803	0.205613	0.075053	-0.012052	0.255975	-0.690642	-0.037907	0.151011	-0.095423	-0.07892	-0.366767	0.507794	0.094778	-0.619873	0.090852	-0.041959	0.692683	-0.006789	0.870987	-0.810048	0.201655	-0.531491	-0.018929	0.420571	0.280367	0.095376	0.433525	-0.039008	0.805472	-0.139382	0.479738	-0.172896	0.700273	0.543578
frg_257	0.29562	0.289679	0.174755	-0.107726	0.066136	-0.297982	0.155741	-0.266087	-0.050352	0.600921	-0.186764	-0.214456	-0.865837	-0.669119	0.28254	0.128598	-0.265717	0.197968	-0.088236	-0.094037	0.079909	0.29639	0.911721	0.291817	-0.462401	0.027172	0.444837	0.125335	0.07641	0.34081	-0.471009	0.11521	0.53427	-0.490063	-0.65808	0.030167	-0.761479	-0.103296	0.074934	0.145649	0.007266	0.033738	0.376191	-0.268126	-0.367094	-0.023004	-0.446104	-0.301588	-0.06408
frg_237	0.548762	0.625028	-0.335377	-0.223541	-0.662164	-0.420433	-0.866734	-0.107043	-0.587508	-0.519803	-0.18929	-0.030485	-0.207724	0.563435	0.232934	-0.138963	0.092547	-0.94683	-0.062336	-0.0533	-1.05079	0.137508	0.847903	0.150718	0.078051	0.267895	0.036638	-0.100504	0.570886	1.06864	0.489133	-0.027647	0.099697	-0.222626	0.910075	-0.561989	0.143311	0.48722	-0.647595	0.114237	-0.13571	0.357776	0.317077	0.062307	-0.634443	-0.30401	0.459726	0.411227	0.200802
frg_304	0.246374	0.528126	-0.331109	0.438087	-0.42407	-0.71227	-0.456741	-0.455485	0.101697	-0.135424	0.568166	-0.606979	-0.022063	0.520527	-0.025317	-0.436265	0.118714	-0.633488	-0.535829	-0.376987	-0.955083	0.035701	0.188731	0.206648	0.094896	0.035517	0.028601	0.040577	0.125985	0.508307	0.502092	-0.345497	0.322807	-0.028189	0.037354	-0.033076	-0.664291	0.091101	-0.534642	-0.00637	0.054804	0.023092	0.012265	0.07747	-0.425502	-0.017675	-0.069533	0.854629	0.51709
frg_145	0.646246	-0.018816	0.162632	-0.150155	-1.065	-0.33182	-0.145122	0.219074	-0.350384	-0.026006	0.091162	0.082095	-0.205732	-0.047233	-0.812821	0.280609	-0.511675	-0.153756	-0.157961	-0.25743	-0.081038	-0.273547	-0.151894	0.170782	-0.117366	-0.750981	0.148639	-0.294685	-0.904496	0.227703	0.15075	0.099142	0.184899	0.237594	0.18095	0.10204	-0.961341	-0.734584	-0.413309	-0.722682	0.059272	0.036577	0.096392	0.147163	0.38564	-0.199456	-0.132918	-0.002166	0.110514
frg_612	0.169191	-0.107689	0.463716	-0.23303	0.500424	0.430356	-0.597643	0.240814	0.681027	1.20295	0.074266	-0.092986	-0.068698	-0.390549	0.147754	0.198699	-0.437219	0.294835	-0.767903	-0.27943	-0.185704	-0.11711	-0.159384	0.182524	-0.230071	-0.38239	0.754367	0.160994	-0.128006	0.936846	0.257684	-0.712619	0.060431	0.606945	0.76872	0.757455	0.513305	0.566514	-0.523013	-0.329434	-0.085448	-0.66742	0.051595	0.642177	0.207634	-0.44332	0.053094	0.319676	0.641031
frg_211	0.571293	1.04972	0.334249	0.210252	0.041956	0.340462	0.567015	0.563444	0.261995	0.1271	-0.006796	-0.421726	0.097769	0.709561	-0.052031	0.04444	-0.028414	-0.119912	-0.120174	0.176219	0.235438	0.059404	0.022291	0.486766	-0.287442	-0.226259	0.035491	0.324256	-0.459793	-0.438615	-0.125672	-0.22418	0.109025	0.170358	0.151803	0.048476	-0.160075	0.177998	0.37503	-0.335845	-0.382269	-0.740415	-0.73127	0.665	0.347898	0.797949	0.073449	-0.235138	0.231532
frg_324	0.249818	0.174817	0.367018	0.035087	0.153583	0.732477	-0.04292	-0.238168	0.972899	0.113908	0.106915	-0.113165	-0.535695	0.246837	0.053543	0.557418	-0.718261	-0.036082	-0.464536	-0.284379	0.452594	0.198554	-0.565527	-0.246796	-0.652446	-0.274155	0.239712	0.127996	-0.092208	0.308219	0.117306	-0.715739	0.560805	0.568555	0.405549	0.007605	-0.034037	0.075641	-0.513969	0.356541	-0.029962	-0.291772	0.102265	0.230207	0.441856	0.382848	0.592861	-0.06103	0.128479
frg_287	0.032992	0.238865	-0.256432	-0.070864	-0.21373	0.162147	0.223323	-0.026062	-0.088267	0.798247	0.05763	-0.299033	-0.546816	-0.15356	-0.082223	-0.091297	-0.229998	-0.268505	-0.018026	-0.144516	0.15224	0.344321	0.272481	-0.168279	0.060448	-0.502083	0.303755	0.001655	-0.15204	-0.360188	-0.299101	0.291913	0.391964	0.157936	0.234975	0.143659	-0.324577	0.019782	0.015254	-0.068087	0.466467	0.089549	0.022655	0.038844	-0.059721	-0.018908	-0.396745	0.032299	0.178051
frg_284	0.491168	0.575942	-0.436024	-0.308633	-0.297657	-0.218238	-0.118826	-0.933324	-0.607926	-0.118683	0.179453	-0.841473	-0.37619	-0.577557	-0.145601	-0.29413	0.341376	0.343159	-0.35277	-0.213235	0.092553	-0.259938	0.70156	-0.304109	-0.369032	0.658052	-0.181443	0.284801	-0.437243	0.853733	0.123686	-0.675967	0.617873	-1.09069	0.171342	0.122361	-0.6434	-0.088177	-0.378328	-0.216451	0.206746	-0.008357	0.500251	0.5848	0.022451	0.215809	-0.15147	0.190536	0.129901
frg_331	0.692834	0.940381	-0.070638	-0.97626	0.033765	-0.396068	-0.048481	0.172954	-0.082664	0.562819	-0.65746	0.412985	0.033646	-1.12054	-0.183172	-0.476358	0.620136	0.017066	-0.013155	0.034449	-0.589517	-0.21862	0.459012	-0.431322	-0.425339	0.321805	0.676505	0.203955	0.154038	0.415316	0.632009	-0.027385	0.081008	-0.804748	-0.24896	-0.805454	-0.280756	0.714973	-0.535529	-0.130312	-0.587182	0.239629	0.264697	0.865101	-0.339181	0.634236	0.088489	-0.082211	-0.090238
frg_158	0.207921	-0.027699	0.506802	0.146745	0.480209	-0.075209	-0.413488	-0.205194	0.79719	0.221174	0.331184	0.102278	0.381746	0.219231	0.62554	0.14979	-0.56293	-0.088412	-0.0845	0.050807	0.230048	-0.331368	-0.250166	-0.50823	-0.152129	-0.447261	0.167787	-0.176825	-0.254048	0.792226	0.120584	-0.656514	0.569459	0.62429	0.353819	0.252269	0.253951	0.088953	-0.278066	-0.071615	-0.394676	-0.11371	-0.225021	-0.052182	0.347542	0.202065	0.609886	-0.343714	-0.075978
frg_349	-0.10687	-0.063247	0.518218	-0.477612	1.18502	0.297597	-0.455293	0.414286	0.851412	1.27645	-0.25534	-0.110329	-0.144199	-0.476159	-0.362734	0.214143	-0.324006	-0.253086	-0.545799	-0.502293	-0.367046	-0.173782	0.281483	0.330621	0.147308	-0.896865	0.965123	0.362336	-0.086635	1.41195	0.178389	-0.68033	0.726432	0.800047	0.800265	0.58241	0.139629	0.366847	-0.571115	0.383061	-0.111304	-0.405493	0.105651	0.591105	0.404305	0.050856	0.224914	0.585776	0.748329
frg_151	-0.316124	1.20501	-0.379733	-0.281199	-0.17231	-0.091576	-0.297492	-0.110722	-0.076223	0.124545	0.073015	0.006217	0.022202	0.850228	0.199366	-0.134593	-0.053602	-0.377011	-0.060123	-0.038606	0.146535	0.802011	0.179341	-0.08976	-0.382362	-0.80885	-0.158947	0.499708	0.014865	-0.208969	-0.523449	0.300186	0.45714	-0.503753	-0.064558	-0.171146	-0.58469	0.094206	0.437227	-0.523996	0.356516	0.11382	-0.355482	0.066134	0.068204	-0.060569	0.509444	-0.354403	-0.105803
frg_232	0.089366	0.144703	-0.281852	-0.372931	-0.791853	-0.296809	0.069433	-0.036424	-0.769478	0.683628	0.096982	0.089867	0.304444	0.22712	-0.18082	-0.033689	0.276381	0.132071	0.014698	-0.291396	-0.585169	0.371166	-0.232129	0.167133	0.34053	-0.52771	0.923935	-0.256136	0.107167	0.49633	0.260748	0.096006	-0.179067	0.158569	0.015168	-0.612417	-0.188574	0.374796	0.586583	-0.109192	-0.671774	0.244533	0.042801	-0.125129	0.483095	-0.040533	0.191041	-0.283382	0.122999
frg_388	-0.50952	0.485784	0.25361	-0.188317	-0.882563	0.258203	0.127043	-0.655879	-0.112769	-0.231515	0.145149	0.261116	-0.711891	0.273446	-0.774386	0.061541	-0.790375	0.214328	-0.067768	0.027604	0.125117	0.185304	0.583675	-0.175682	0.182573	-0.949417	-0.062438	0.656838	0.192715	-0.171571	-0.209667	0.45855	0.290299	-0.301661	0.047988	-0.050473	-0.975067	-0.390031	-0.381309	0.313999	-0.081888	-0.606527	0.33429	0.212439	-0.494045	0.067534	0.289045	-0.79544	0.317262
frg_327	-0.593009	0.063915	0.132248	-0.085498	-0.554262	0.096733	0.044234	-0.034883	-0.245042	0.213438	0.847826	0.341332	-0.468034	-0.053217	-0.048129	0.045885	-0.437598	-0.17625	-0.284055	0.047854	0.170676	0.237634	0.179496	-0.679405	-0.553113	-0.664694	0.031826	-0.105382	-1.1475	0.87185	0.537753	0.177995	-0.296554	0.720891	-0.460273	-0.012461	-0.174395	-0.475501	-0.342665	0.530175	0.116085	-0.719445	0.425187	0.529965	-0.27872	0.061687	-0.027292	-0.025693	0.603138
frg_111	0.177443	0.284131	-0.56602	-0.202289	-0.153467	-0.065476	-0.278045	-0.809055	-0.313752	0.167077	-0.953587	-0.48793	-0.656681	-0.219434	-0.515591	-0.195071	0.126505	-0.231425	0.31843	-0.065268	0.208199	0.087676	0.094331	0.225456	-0.344215	0.917301	-0.040414	0.584526	-0.268692	0.539728	-0.313616	-0.574828	-0.140274	-0.975373	-0.289233	-0.976915	-1.20917	-0.482717	-0.231131	-0.19948	-0.347097	-0.252966	0.383405	0.458882	-0.082462	0.530847	-0.433255	0.145588	0.152783
frg_123	-0.073422	4.6e-05	0.263958	-0.388163	0.219253	-0.437079	-0.15171	-0.225537	-0.161618	0.135804	-0.12132	0.215276	-0.25195	-0.465934	0.37154	-0.334153	0.345019	0.113082	0.268875	-0.367897	-0.252016	-0.445886	0.442067	-0.188773	-0.499818	0.266403	0.128717	-0.455998	0.497577	0.317271	0.124993	-0.246752	0.118029	-0.305837	-0.706748	-0.68206	-0.250733	0.094216	0.108561	-0.114733	-0.224388	-0.061785	-0.041859	0.738001	-0.140055	0.336299	-0.449091	-0.164117	0.217018
frg_186	-0.091475	0.237319	0.054274	-0.001434	-0.621293	0.505005	0.366587	-0.088235	-0.29773	-0.196764	0.435059	-0.056299	-0.107788	0.558215	0.176678	-0.2039	-0.861843	-0.49847	0.524163	-0.433808	-0.001937	-0.307197	-0.370276	0.060564	0.680501	0.075375	-0.074858	-0.072815	0.072168	-0.033516	-0.155608	0.046767	0.270863	0.298015	0.139827	-0.58073	-0.243897	0.080441	0.230411	0.285536	-0.194065	0.032176	-0.234256	0.799347	-0.132465	-0.417206	-0.193098	-0.334335	-0.057344
frg_282	-0.017361	0.493002	-0.201713	-0.273828	-0.140093	-0.091198	0.358914	0.292659	0.244449	-0.060848	-0.082491	-0.914268	-0.216836	0.888328	-0.048431	-0.391561	-0.354796	-0.279397	-0.682048	0.371823	0.145321	-0.359481	0.242935	0.116193	0.338906	0.073999	0.286243	0.546862	-0.13421	-0.110081	-0.251246	-0.000647	-0.047529	-0.256845	-0.382957	0.229877	-1.07971	0.036414	-0.071313	-0.683319	0.463603	-0.022034	0.326612	0.179429	-0.228036	0.622992	0.314681	-0.290711	-0.493489
frg_138	0.341171	0.831274	0.189248	0.185248	0.214249	-0.817353	0.09493	-0.574714	-0.26214	0.177056	-0.596981	0.776292	-0.103917	-0.585227	-1.11093	-1.0569	0.528279	0.442243	-0.10034	-0.31109	-0.687362	-0.169202	0.424953	-0.533216	-0.219598	0.734721	0.617792	0.202357	-0.168253	0.000371	0.536754	-0.400953	-0.033182	-0.592256	0.016604	-0.447424	-0.907537	0.393764	-0.063328	-0.459813	-0.077608	0.055258	0.367535	0.880878	0.120109	0.506103	-0.355324	0.417126	-0.324562
frg_279	0.257445	-0.452576	0.658204	0.313751	0.0971	-0.077263	-0.24793	-0.095552	0.061997	-0.21706	0.406741	0.164605	0.4048	0.399431	-0.771937	-1.09794	0.228623	-0.553571	0.409781	-0.258662	-0.426132	-0.132929	0.145498	-0.184986	0.080577	0.028858	0.290452	-0.743982	-0.060039	0.077172	0.847834	-0.044649	-0.306338	-0.683728	-0.483661	-0.132628	-0.392304	1.08991	0.473788	0.587878	-0.474587	0.005056	0.061956	0.546787	-0.015881	0.15739	-0.136653	0.787525	-0.027008
frg_78	0.115478	0.017818	-0.464529	-0.086416	-0.199081	-0.578332	-0.509491	0.230174	0.238951	0.451397	0.170399	0.328236	-0.041774	0.547432	0.732577	-0.102865	0.225483	0.216379	-0.036413	-0.24022	0.0469	-0.306949	1.18922	-0.486848	0.077219	-0.315438	-0.199431	0.112606	0.657088	0.183719	-0.937598	-0.13414	0.509297	-0.03955	-0.832942	0.046977	-0.436477	0.087274	-0.185379	-0.056257	0.620762	0.28887	-0.044483	0.701659	-0.381391	0.136649	-0.301863	-0.121112	0.22934
frg_125	0.787312	0.285887	-0.119447	0.658426	-0.149357	-0.320434	-0.256115	-0.032362	-0.534911	-0.648547	0.224426	-0.445161	0.098633	0.646754	0.485201	-0.235549	-0.007544	-0.716023	-0.665599	-0.218442	-0.744395	0.240354	0.37049	0.061081	0.316823	0.435688	0.587833	0.086148	0.658802	0.57503	0.222899	-0.079173	0.429757	0.135279	0.323544	-0.194895	-0.718244	0.242253	-0.801673	0.163129	-0.04853	0.195887	-0.01139	0.637065	-0.386133	0.308524	0.49492	0.566612	0.473003
frg_185	0.320684	0.341954	-0.163491	-0.374677	0.317339	-0.559807	-0.131883	-0.383014	-0.058308	0.217795	-0.309803	0.592563	0.164157	-0.467228	-0.62151	-0.665397	0.547819	0.25144	0.203016	0.061041	-0.724267	-0.187013	0.350395	-0.557902	-0.467532	0.339542	0.597172	0.009902	0.221664	-0.008881	0.481052	-0.401629	0.005138	-0.761184	-0.17257	-0.736384	-0.612584	0.321243	-0.072142	-0.315277	-0.51868	0.127194	0.003756	0.904137	-0.000289	0.447752	-0.341879	0.065854	0.119128
frg_276	0.272134	0.400855	-0.006009	0.183118	0.04333	-0.246323	-0.271652	-0.583631	-0.304437	0.215985	-0.08594	0.054831	-0.009575	-0.139194	0.680328	0.159971	-0.504541	-0.105934	-0.350254	0.439883	0.419844	0.127597	-1.0766	-0.419905	-0.317809	-0.289009	0.661717	-0.294008	-0.147827	0.196719	-0.025019	-0.519668	0.336714	0.580897	-0.17394	0.238259	0.462139	-0.105358	0.47661	0.341535	-0.311393	-0.334844	-0.802663	0.205725	0.603233	0.452157	0.53453	-1.09835	-0.329958
frg_114	0.330042	0.353287	-0.142121	-0.471077	-0.39143	0.163394	-0.103301	-0.426014	-0.116153	0.631101	-1.30676	-0.643188	-0.460515	-0.42432	-0.32842	-0.067611	0.114935	-0.212512	0.63688	-0.215913	-0.15541	0.153263	0.376937	0.138099	-0.455719	0.4781	-0.200371	0.603022	-0.224537	0.395111	-0.331893	-0.746507	-0.383079	-0.95711	-0.365124	-0.866931	-0.957329	-0.147859	-0.597788	-0.045989	-0.156479	-0.220684	0.036168	0.008676	-0.104391	0.514632	-0.454807	0.127567	0.103072
frg_408	0.401137	0.432	-0.278614	0.580396	-0.280636	-0.482753	-0.467564	-0.511721	-0.997626	0.18766	0.646128	-1.02764	-0.008795	1.36684	0.440176	-0.40829	0.663008	-0.50777	-1.0058	-0.531166	-0.551615	-0.102225	0.30309	-0.459891	0.26858	-0.183892	0.194325	0.165398	0.133962	0.932239	0.679732	-0.054223	0.469883	0.27646	0.069869	0.486012	-0.949457	0.357817	0.353874	-0.018549	-0.108695	0.042957	-0.059956	0.254291	0.162268	0.619812	0.27789	0.396984	0.700216
frg_359	0.525493	0.038526	0.040536	0.16742	-0.078219	-0.540304	-0.184544	-0.30789	0.078584	0.037843	-0.509182	0.154938	0.062729	-0.705339	0.282881	-1.23568	0.823446	0.218224	-0.12204	-0.315488	-0.619994	-0.503725	0.37497	-0.685546	-0.266752	0.363858	0.043318	-0.118596	0.129928	-0.256365	-0.106348	-0.612997	0.563011	-0.535469	-0.66485	-0.762169	-1.11615	0.85711	0.513621	0.045475	-0.477794	-0.609665	0.761982	0.395278	0.210071	0.023287	0.000477	0.280687	-0.140681
frg_204	0.525163	0.25331	-0.431918	-0.554461	-0.37305	-0.526076	-0.366405	-0.217713	-0.269663	0.225453	0.118381	-0.606637	0.036803	0.835907	0.211047	0.165883	-0.27156	0.344218	0.382989	0.416711	-0.071188	-0.10106	0.139716	0.151306	-0.235636	-0.795371	-0.010483	0.246886	-0.170399	0.00539	-0.460595	0.407	0.565949	0.470559	0.1731	-0.080795	-0.616476	0.08209	0.126459	-0.642956	-0.081095	-0.170773	0.019253	0.0906	-0.214758	0.124621	0.114139	-0.455598	0.393463
frg_302	0.876745	0.356541	0.208222	-0.584965	-0.704754	-0.120487	0.710524	-0.108217	-0.625475	0.13839	0.024589	0.276581	-0.242759	0.100313	-0.105655	-0.71274	0.559614	0.378714	-0.607822	0.431946	-0.478657	0.326573	0.000208	0.030205	-0.586462	-0.268382	0.807899	-0.166628	0.758246	0.327379	0.374175	0.301587	-0.082432	-0.282167	-0.61021	-0.530918	-0.396065	0.217539	0.399068	-0.105131	-0.386644	-0.088873	-0.363892	-0.239441	-0.110179	0.212518	0.600158	-0.097346	0.593413
frg_115	0.388135	0.389582	-0.170656	-0.598912	-0.253036	0.185283	-0.330027	-0.850788	-0.631649	0.003834	-1.41397	-0.786683	-0.307851	-0.25747	-0.954789	-0.05952	0.164927	0.117306	0.637482	0.062241	0.104825	-0.155318	0.147793	0.382152	-0.672109	0.442155	0.059792	0.570171	-0.419149	0.340551	-0.462225	-0.791315	-0.314215	-1.04112	-0.316222	-1.05683	-1.33384	0.129927	-0.517241	-0.104201	-0.337154	-0.170809	0.306172	0.053115	-0.029668	0.535601	-0.471594	-0.097764	0.20431
frg_596	0.245604	1.00367	-0.549319	-0.059562	0.282609	-0.261416	-0.168218	-0.068639	-0.023048	0.026183	0.304207	0.358344	-0.033217	-0.270978	-0.838337	-1.22801	0.480333	0.382947	-0.436824	-0.293901	-0.060978	-0.695724	-0.523845	-0.348004	-0.742658	0.615961	0.657839	0.915873	-0.284473	0.029297	0.838385	-0.297584	-0.312435	-0.890866	0.336851	-0.238276	-1.10423	0.104472	-0.46197	-0.147572	0.130315	-0.197585	0.211415	0.891432	0.245985	0.596826	-0.304892	0.55239	0.072771
frg_254	-0.363984	-0.191503	-0.11084	0.224586	-0.121125	0.320045	-0.379499	-0.399899	0.658103	0.528406	0.093642	-0.114673	-0.38776	0.460648	0.06909	0.321041	0.019749	-0.241156	-0.361149	0.075997	-0.333856	0.2638	0.234403	-0.191483	-0.13383	-0.23283	0.325265	0.393034	0.041901	0.155966	0.183428	0.162953	0.301493	0.249326	0.104003	-0.315058	-0.377104	0.267644	-0.56636	0.153999	0.001962	-0.281772	-0.332352	0.009714	0.11292	-0.162017	0.268914	-0.215202	0.455604
frg_280	-0.50506	-0.634235	0.478683	-0.248964	0.03565	0.366258	-0.421162	0.21136	0.64401	0.291426	0.589163	-0.045402	0.061556	-0.083607	-0.925898	-0.939329	0.392214	-0.673374	-0.173436	0.080432	-0.415349	0.142457	-0.523924	0.131515	0.339915	-0.370617	0.531822	-0.478807	0.048288	0.152482	1.22744	0.52189	0.057561	-0.492544	-0.332677	-0.175508	-0.308428	0.803373	0.540156	0.517705	-0.323801	-0.406185	0.401497	0.414191	-0.133323	0.776222	-0.160875	1.08486	-0.192333
frg_247	0.606047	0.023115	-0.182899	0.365823	-0.569946	-0.998684	-0.510845	-0.634238	-1.1852	-0.239015	0.11313	-0.092903	0.150485	0.838762	0.153925	-0.42384	0.529932	-0.651568	-0.458892	-0.907672	-1.11787	-0.274174	0.509902	0.263247	-0.347782	-0.125156	0.353511	-0.082992	0.456439	0.473783	0.703898	-0.442555	0.165599	0.223656	0.27313	0.081859	-0.817196	0.192295	0.509463	-0.284581	0.305985	0.708467	-0.300414	0.597503	0.2654	0.146383	0.352232	0.636183	0.951554
frg_155	0.182982	0.197988	0.083372	0.051696	0.051076	0.200508	-0.766548	-0.52145	0.305649	-0.216533	-0.457635	-0.046218	-0.158585	0.593837	0.00296	0.076433	-0.045787	-0.398098	-0.319934	0.512725	-0.356581	-0.176145	-0.025353	-0.280425	-0.19578	-0.1787	0.031863	-0.076044	0.058356	-0.516837	-0.262775	-0.537035	0.746192	0.558811	0.196623	-0.75569	0.324102	0.435988	-0.236815	-0.592222	-0.263341	0.059059	0.48552	-0.030199	-0.01163	-0.280569	0.814307	-0.840656	0.031223
frg_101	0.622865	0.910268	0.355418	0.290202	0.076586	0.067941	0.172533	0.472364	0.03075	0.256244	-0.065052	-0.533726	0.085981	0.665624	0.042431	-0.317845	-0.133685	0.094205	0.112804	0.235031	0.156765	0.371807	0.318318	0.419763	0.092299	-0.089836	-0.11098	0.741459	-0.601331	-0.490386	-0.562425	-0.086294	-0.09318	-0.067177	0.211862	-0.241365	0.13498	0.103353	0.262487	-0.509337	0.104241	-0.127987	-0.361934	0.351333	0.308473	0.171578	0.015401	-0.083332	-0.084575
frg_139	0.130743	0.519256	-0.591775	0.190171	-0.112301	-0.303809	-0.174343	-0.037138	-0.298385	0.77819	-0.631718	0.45285	-0.302481	-0.781564	-0.451913	0.657794	0.553659	0.245406	-0.120365	-0.423047	-0.64264	0.248999	0.096395	-0.250828	-0.711167	0.089664	0.970966	0.403224	0.329856	0.278423	0.495007	-0.436654	0.246042	-0.991661	-0.616293	-0.371042	-0.522749	0.123911	0.016023	0.438643	0.018769	-0.085666	-0.440208	0.540684	-0.248212	0.578425	-0.177687	0.711669	-0.367027
frg_181	0.520611	0.248808	0.52745	-0.02098	0.188787	-0.458509	-0.23795	-0.496341	0.168429	0.249636	-0.188065	0.203331	0.227575	-0.677465	0.390821	-0.599662	0.169131	-0.106283	0.110925	0.374836	-0.204325	0.207883	0.301718	-0.405394	-0.061906	0.359988	0.035195	-0.627374	0.38471	0.198155	0.2065	-0.496481	-0.208473	0.242299	-0.612414	-0.886488	-0.177525	-0.054395	-0.048491	0.202986	-0.764116	0.283528	0.314937	0.050881	-0.186018	-0.796871	0.052187	-0.319066	-0.236848
frg_113	0.359155	0.546708	-0.415034	-0.416117	-0.386241	0.028983	-0.305833	-0.571689	0.206154	0.373626	-0.946669	-0.218503	-0.841565	-0.726125	0.309522	-0.008112	0.03905	-0.424442	0.43424	-0.161546	-0.003906	-0.007689	0.454116	-0.054934	-0.378437	0.532854	-0.217423	0.567679	0.035335	0.059092	-0.737477	-0.557779	-0.122057	-0.690952	-0.293115	-0.604033	-0.820198	-0.43893	-0.415346	0.138093	0.033128	-0.246109	-0.024082	0.159043	-0.230329	0.445669	-0.55332	0.26057	0.1144
frg_152	0.072887	0.503212	-0.226325	-0.474322	-0.399128	-0.015794	-0.20551	-0.08119	0.066614	0.572812	0.096803	-0.108953	-0.106937	0.759171	0.154872	-0.395686	-0.322908	-0.206407	0.382288	-0.342978	0.273333	0.325943	0.547668	-0.387935	-0.066018	-0.450212	0.08911	0.419496	-0.304454	-0.222187	-0.690779	0.495997	0.683972	-0.020695	0.119765	-0.206404	-0.420806	-0.085703	-0.132686	-0.512996	0.391016	0.269085	0.02762	0.153116	0.079451	0.032501	-0.26436	-0.369597	0.280684
frg_303	0.453546	0.22957	-0.040999	-0.287954	-0.636277	-0.670638	0.845119	-0.136904	-0.463878	0.072711	0.20407	-0.72676	-0.052961	0.241597	0.051873	-0.703338	-0.012005	0.000735	-0.579068	-0.391104	0.165534	-0.140421	0.506531	-0.214028	0.025776	0.393369	0.490235	-0.238651	-0.062874	0.771116	1.06461	-0.032508	-0.523355	-0.600229	-0.532645	0.201087	-0.810667	-0.398339	0.372446	-0.553919	0.248184	-0.273544	-0.822329	-0.253229	-0.115534	0.754348	0.033972	-0.189048	-0.041418
frg_179	0.185627	0.119626	-0.872322	-0.317504	0.078017	-0.261279	-0.174783	0.436643	-0.46532	0.406581	-0.219964	-0.621265	-0.532452	-0.728029	0.709204	-0.20358	-0.053896	0.076417	-0.274656	-0.121149	0.014897	0.081175	0.095184	-0.52157	-0.439457	0.262541	0.512187	0.539808	0.415249	0.868201	0.422688	-0.31983	0.206465	-1.14342	0.356062	-0.062269	-0.192233	0.284924	0.489998	-0.131757	-0.492695	-0.515758	0.116652	0.25255	-0.662116	0.121688	-0.640267	-0.041229	-0.276094
frg_727	0.189775	0.710314	0.76809	-0.047059	-0.608885	-0.000274	0.002249	-0.049053	-0.063787	-0.295335	-0.237033	-0.063146	0.069634	-0.391217	0.281073	-0.700654	0.68243	-1.00131	0.273429	0.290244	-0.426616	-0.556365	0.328112	-0.266217	-0.104136	-0.43398	0.244205	0.790632	-0.113983	0.071827	0.475449	-0.109479	-0.428358	-0.503485	-0.078879	-0.600091	-0.650465	0.017387	0.35252	0.077919	-0.552495	0.129304	-0.828149	0.221	-0.159325	1.09759	-0.468732	-0.169658	0.810591
frg_213	0.818087	1.22358	0.520121	-0.336576	0.277114	0.396034	0.776928	0.527022	0.175762	-0.014641	-0.034369	-0.647421	-0.099934	0.516747	-0.340911	0.487081	-0.496363	-0.269199	-0.02544	0.127851	0.003419	-0.304136	-0.146061	0.643894	-0.090464	-0.085327	0.308911	0.193884	-0.713628	-0.46692	-0.603782	0.132216	0.198015	0.262286	0.10531	0.077856	0.268693	0.460332	0.205811	-0.18111	-0.28118	-0.726662	-1.17101	0.630372	0.228742	1.30737	-0.151471	-0.167478	0.411163
frg_268	-0.051992	0.839103	-0.232655	-0.632179	-0.266427	-0.193442	-0.288589	-0.32311	-0.701997	0.192523	-0.167328	-0.871052	0.069837	0.371985	-0.103149	0.130616	0.894898	0.057444	0.34969	0.011647	-0.234082	0.156283	-0.193359	-0.768479	-0.072276	-0.238259	0.398601	-0.317407	0.238337	-0.105898	-0.134065	0.118964	0.629456	-0.102547	-0.668162	-0.717499	-0.757924	-0.247802	0.661667	-0.452442	-0.029444	0.316012	-0.508102	-0.481539	-0.220691	-0.063036	0.947248	-0.6727	0.529053
frg_448	1.08027	0.11392	0.425761	0.32005	0.508341	0.182771	-0.867399	0.025694	0.612296	-0.30218	0.253903	-0.086678	0.238523	0.113395	-0.521907	-0.165453	-0.020093	-0.17408	-0.537504	0.219903	-0.37263	-0.076742	-0.769372	-0.855375	0.526575	-0.290179	-0.442392	-0.063762	-0.058639	1.21213	0.577471	-1.07306	0.475569	-0.215487	0.351316	-0.862936	0.155591	0.604255	-0.459352	-0.002583	-0.242599	0.576938	-0.43828	0.041373	0.916664	-0.451278	0.105927	0.991074	0.226884
frg_367	0.730975	0.648086	-0.545384	0.307456	-0.115874	-0.186412	-0.257178	0.070185	0.341831	-0.507562	0.02475	-1.0597	0.072822	0.528719	0.399709	-0.720993	0.32457	-0.140787	-0.963319	-0.320342	-0.826781	-0.048081	-0.12096	0.007708	0.1786	0.292911	0.472855	0.522008	0.585437	0.405652	0.201083	-0.182819	0.671467	0.158748	0.550906	-0.124967	-0.899225	0.249029	-0.004296	-0.525281	0.411718	0.559664	-0.439494	0.403832	-0.021714	0.434191	0.030948	0.503724	0.170873
frg_398	0.455663	-0.045167	-0.74969	0.020492	-0.30692	0.145999	0.067394	-0.042666	-0.207585	-0.052938	0.023783	-0.575372	-0.50041	-0.058646	-0.179253	-0.033484	-0.222917	0.302135	-0.437304	0.055644	-0.010594	0.186872	0.328379	0.130024	-0.11514	-0.578817	0.588191	0.460473	-0.462686	-0.284416	-0.018766	-0.124918	0.456593	0.397804	0.537396	0.132281	-0.339968	0.071622	0.118105	0.157527	-0.387299	0.17352	-0.065155	0.177118	-0.141086	-0.482391	-0.0481	0.279126	-0.10388
frg_376	0.810804	0.431265	1.21691	-0.426354	-0.451907	-0.075553	-0.165634	0.311329	0.35713	-0.391402	-0.195298	0.571372	0.063238	-1.41017	0.483047	-1.40142	0.823502	-1.61853	0.043242	0.486437	-0.653617	-1.05682	0.640172	0.037685	0.294778	-0.269183	-0.259795	0.011545	0.304399	0.073462	0.282721	-0.413886	-1.01014	0.049627	0.005502	-0.752347	0.370032	0.244756	-0.721882	-0.02311	-0.415811	-0.360665	-0.301537	0.855024	-0.399902	0.270536	0.105834	-0.231941	0.490031
frg_240	0.489135	0.455387	-0.655095	0.119319	-0.106344	-0.039078	0.0731	-1.00954	-0.275998	0.176021	-0.947745	-0.679582	-0.47246	-0.511101	-0.224985	-0.027534	-0.36789	0.300019	-0.054467	-0.132567	0.370437	-0.003609	0.288685	-0.110177	-0.319893	0.482857	0.128306	0.419523	-0.359763	0.222205	-0.789536	-0.387617	0.395602	-0.756622	-0.16288	-0.844271	-1.12933	-0.23802	-0.609701	-0.166342	-0.229286	-0.490228	0.00969	0.058176	-0.211628	0.630342	-0.25237	-0.148521	-0.188139
frg_243	0.301389	-0.044259	-0.210876	-0.319558	-0.776966	-0.02882	0.625286	0.30103	-0.297746	-0.106092	-0.473913	-0.560698	0.32318	0.333597	0.272445	0.104898	0.179401	0.61666	-0.332926	0.015195	-0.025112	-0.377657	0.317627	0.400023	0.127005	-0.012949	0.982625	0.776672	-0.028982	-0.102933	-0.930457	-0.137399	0.163224	-0.373332	-0.359589	-0.626484	-0.636325	-0.107964	0.490452	-0.614432	0.134715	0.271738	0.535659	-0.009403	0.65893	0.173424	0.461957	-0.005627	-0.12651
frg_234	-0.327293	-0.557432	0.577721	-0.833692	0.150662	0.636218	-0.48397	0.417522	0.705289	0.052721	0.83319	-0.051405	-0.057443	-0.197328	-0.374676	-0.710738	0.458313	-0.898461	0.082515	0.034728	-0.189131	-0.168015	-0.282336	-0.057993	0.110178	-0.605354	0.230221	-0.423167	-0.072218	0.430245	0.961272	0.527286	0.262758	-0.22215	-0.028704	-0.208789	0.269917	0.293903	-0.131217	0.256391	-0.20052	-0.133308	0.503296	0.012656	-0.126292	0.832429	-0.469042	1.0771	-0.223433
frg_407	0.049327	0.937347	0.081544	-0.52266	0.163404	-0.234428	0.490544	-0.725924	-0.309106	-0.211399	-0.387971	-0.797272	-0.426321	-0.167904	-0.722041	-0.182691	0.174344	-0.230774	-0.077581	0.264421	0.071846	0.493781	0.083157	-0.437519	-0.813681	0.549246	0.097994	0.765797	-0.510788	0.341992	-0.027056	-0.256345	-0.054252	-1.3845	-0.304982	0.072115	-0.500052	0.318665	-0.450873	-0.011524	0.065482	-0.129296	0.614801	0.54173	0.066068	0.493106	-0.329234	0.246661	0.03511
frg_373	0.128562	0.606063	0.019726	-0.14726	0.280186	0.270181	-0.085387	0.683311	0.543901	0.592776	-0.482348	-0.628436	0.332858	0.48374	-0.0543	-0.461957	-0.192405	0.206049	0.998001	0.182209	0.317664	0.084605	0.69213	0.182411	0.016342	0.307858	0.577591	0.760583	0.002545	-0.276134	-0.78924	-0.41092	-0.233994	0.093693	-0.44641	-0.155827	-0.390481	0.198471	0.373405	-0.274248	-0.41811	0.238222	-0.931378	0.712861	0.7788	-0.320251	-0.107706	-0.692644	-0.41733
frg_319	0.854537	0.142729	-0.16489	0.198919	-0.888299	-0.441294	-0.197231	-0.306953	-0.374402	-0.420825	-0.612358	-0.159941	0.256577	0.276089	0.302237	-0.268753	-0.47581	-0.252232	-0.455678	-0.462397	0.188185	0.110296	0.51415	0.210258	0.247083	0.292424	0.696473	0.136303	0.508744	0.929206	0.243964	0.024437	0.214516	0.184753	0.528072	-0.031603	-1.12283	-0.461157	-0.4615	0.272656	0.104421	0.63589	0.170146	0.395372	-0.060035	0.189911	0.220872	0.379542	0.287771
frg_410	-0.223753	-0.044905	0.159795	-0.522237	0.248534	-0.670249	-0.213725	-0.292795	0.011615	0.471689	-0.254817	1.3378	0.178031	-0.711854	0.804513	-0.837405	0.231479	-0.760635	-0.728129	-0.74687	-0.772465	-0.299252	-0.019516	-0.614326	0.611089	0.568899	-0.449529	0.751699	0.393237	0.85753	0.147094	-0.267059	-0.067369	-0.47342	0.227777	-0.624819	-0.911435	-0.556468	-1.21959	0.207066	-0.272861	-0.058152	-0.556511	0.544511	0.640197	-0.442369	0.376207	0.321851	0.065543
frg_320	0.413884	0.665473	0.71442	0.035002	0.077528	0.753153	-0.993606	-0.366628	-0.234127	-0.206098	0.571525	0.313655	0.312648	0.600535	0.018801	-0.364256	-0.997215	-1.11121	-0.103856	0.123226	-0.207015	-0.463544	-0.704118	-0.087823	-0.025582	-0.029372	-0.507176	-1.16844	-0.22009	0.462965	0.387985	-0.279386	0.449861	-0.321871	-0.063489	0.47154	-0.493887	-0.017588	0.13756	-0.50146	0.538926	0.300457	0.129092	-0.13546	0.117723	0.230905	0.06371	0.200344	0.402982
frg_335	-0.079936	0.90863	-0.03454	-0.211343	-0.208225	-0.231367	-0.6413	-0.761775	-0.757125	0.330249	-0.478637	0.053501	0.438795	0.093911	-0.290484	0.033211	0.901143	-0.209194	0.162375	-0.054743	-0.087952	0.116034	-0.316498	-0.073399	-0.181678	0.212414	0.72722	-0.342832	-0.69906	-0.051659	0.233377	-0.536911	0.585423	-0.024731	-0.518947	-0.449578	-0.847028	-0.023666	0.36737	0.214876	-0.338269	0.508101	-0.73872	-0.249907	-0.556965	-0.324831	0.49269	-0.61352	0.66063
frg_163	0.693591	0.395434	-0.71791	-0.211132	0.101525	-0.495082	-0.483191	-0.006394	0.688973	-0.128949	-0.278752	0.110436	-0.347791	-0.703972	0.298707	-0.190437	0.745744	0.272029	-0.018668	-0.630751	-0.372467	-0.472109	0.427927	-0.483386	-0.639726	0.360949	0.260528	0.712457	0.674066	0.291735	-0.200348	-0.2958	0.646507	-0.632136	-0.898606	-0.175299	-0.517139	-0.086891	-0.33915	-0.410224	0.30773	-0.240976	-0.384466	0.769661	-0.067644	0.296526	-0.632349	0.314859	-0.815008
frg_344	0.678706	0.821884	0.165016	0.318918	0.549255	-0.613937	0.082213	-0.213872	0.172053	-0.310982	-0.24454	0.381651	-0.178962	-0.951026	-0.098296	-1.21806	1.01766	-0.149997	0.410357	0.243151	-0.20222	-0.341973	-0.145325	-0.327415	-0.933497	0.871083	0.53057	0.649189	-8.4e-05	0.407636	0.573054	-0.742209	0.186874	-1.17111	-0.417217	-0.359681	-0.550164	0.066759	-0.368077	-0.252311	0.078519	-0.181423	-0.293885	0.649933	-0.326047	0.476473	-0.253221	0.559263	-0.329193
frg_432	-0.415825	-0.171623	0.554404	0.180671	0.038149	-0.268328	-0.442388	0.125165	0.187538	0.143592	-0.104604	0.512433	-0.253069	0.016601	0.400312	-0.930357	-0.032885	-1.55971	-0.240932	0.244503	-0.686942	-0.241428	-0.248667	-0.865196	0.300893	-0.419776	-0.347805	-0.23628	-0.44367	0.304179	0.436415	0.179981	0.413461	-0.113234	-0.531399	-0.119455	-0.862277	-0.318639	-1.21246	0.19327	-0.502826	-0.501602	-0.251157	0.812138	0.354627	-0.046032	0.186293	0.728594	0.564918
frg_212	0.358482	1.13596	0.31621	-0.158153	0.391456	0.817762	0.736768	0.706856	0.165306	0.027725	0.238768	-0.709603	-0.484738	0.693352	-0.203208	0.488433	-0.527576	-0.584285	0.118788	-0.091008	-0.040772	-0.041534	0.027663	0.05102	-0.163203	-0.456572	0.396251	0.085016	-0.548368	-0.365337	-0.503018	-0.05994	0.304503	0.451126	0.222323	0.47254	0.112178	0.397922	0.029407	0.003937	0.07445	-0.748681	-1.12672	0.788823	0.471248	1.24102	-0.026438	-0.161414	0.572561
frg_109	0.554429	0.311094	0.01129	-0.309475	-0.558668	0.618922	-0.403876	-0.701817	-0.265937	0.37208	-1.3685	-0.547581	-0.574807	-0.601783	-0.381318	0.14768	-0.363232	0.231393	0.175199	-0.307367	0.62296	-0.331472	0.17829	0.345389	-0.686124	0.160767	0.377807	0.49111	-0.268224	0.476507	-0.765855	-0.507944	-0.087895	-0.398908	-0.463091	-0.924603	-1.71518	-0.110869	-0.459143	-0.080085	-0.506776	-0.274417	-0.205173	-0.071709	-0.232231	0.759112	-0.40772	0.062243	0.030166
frg_338	0.260894	0.337293	-0.718729	0.115443	-0.648603	-0.090971	0.287913	-0.134451	0.082067	0.082613	-0.038045	-0.444444	0.037075	0.19517	0.077661	-0.408111	-0.508648	-0.253458	-0.540215	0.175827	0.393172	0.565266	0.091276	-0.149282	1.16068	-0.423769	-0.145145	1.27818	-0.23843	0.281975	0.079114	0.33926	0.525695	-0.254861	-0.179212	-0.106387	-0.626063	-0.39004	-0.792849	0.472432	-0.114717	0.610633	0.745219	0.189271	-0.01484	-0.06196	0.281366	0.227086	-0.527247
frg_477	0.226221	0.184154	-0.451847	-0.301634	0.136146	-0.211698	-0.150913	-0.701614	-0.335296	-0.536303	-0.316314	-0.211015	-0.131122	-0.346052	-0.244285	-0.526241	0.260127	0.179533	0.479035	-0.196525	-0.07752	0.25952	0.613516	-0.825732	0.025359	0.799132	-0.357556	0.25516	-0.542833	1.02236	0.667254	-0.443975	0.21685	-1.05637	-0.222038	-0.416774	-0.293528	0.117556	-0.426845	0.119994	-0.032686	0.096537	0.465563	0.252232	0.145098	0.309302	-0.491481	0.499365	-0.038654
frg_580	-0.236827	0.812206	-0.015161	-0.580365	0.47047	-0.644076	0.721988	-0.624798	0.02453	-0.084268	-0.071087	0.025392	-0.127626	-0.547733	-0.925778	-0.06329	0.660602	0.003433	-0.049461	0.1031	-0.703786	-0.019872	0.574052	-0.133452	-1.174	0.462592	0.50975	0.788576	-0.03574	0.365792	0.054639	-0.520989	0.36531	-0.977062	-0.046017	0.150076	-0.366996	0.337451	-0.857448	0.137377	-0.096128	0.225184	0.427316	0.336215	-0.127229	0.522337	-0.056307	0.406382	-0.004611
frg_159	0.9312	0.567353	-0.168219	0.117605	-0.094184	0.226138	0.576719	0.177339	0.054635	0.243258	0.049303	-0.5222	0.32294	0.60226	0.63918	-0.219954	0.197657	-0.105949	0.310174	-0.242606	-0.0686	0.574445	0.19447	0.281622	0.298132	-0.338124	-0.100039	0.689219	-0.366625	-0.187344	-0.072838	-0.082951	0.183352	-0.168558	-0.189829	0.309712	-0.159023	0.139218	-0.264893	-0.051797	-0.334744	-0.461445	0.407968	0.585509	0.170471	0.123284	0.295708	-0.100846	0.063416
frg_90	0.406775	-0.264124	-0.268986	-0.742589	-0.252946	0.017634	-0.543398	-0.019884	-0.096942	0.123784	-0.226321	0.054115	0.191197	0.065347	0.081302	-0.131998	-0.555743	-0.009787	0.775396	-0.455412	-0.54499	-0.019485	0.695305	0.294572	0.149833	-0.359563	0.280625	-0.290165	0.33944	0.327351	0.258273	0.11666	0.30553	-0.143306	-0.166581	-0.860698	-0.162886	0.52071	-0.394113	-0.145473	-0.418826	0.117515	0.656451	-0.328569	0.064332	-0.001043	-0.513828	-0.251633	0.05381
frg_227	0.527191	-0.356109	0.614208	0.040912	-0.180224	-0.403394	0.229028	-0.597764	-0.045531	0.154237	-0.005054	0.354698	-0.069371	0.404984	0.524695	-0.373653	0.136685	0.431478	0.049053	-0.147056	-0.626064	-0.227665	0.323857	-0.014366	-0.484093	0.230372	0.934782	0.434573	0.343904	0.840675	0.503025	-0.197127	0.034549	-0.552877	0.181961	-0.702241	-0.727315	0.393462	0.122593	-0.080727	-0.543568	-0.230339	-0.162066	0.262039	0.529366	0.057597	-0.065695	-0.260002	0.736854
frg_150	0.581281	0.346121	0.167984	-0.457593	-0.737426	-0.490555	0.314492	0.394673	-0.226626	0.117557	-0.103248	-0.145485	-0.201883	0.569033	-0.293755	-0.33413	0.381861	-0.519252	-0.254875	-0.038623	0.181641	0.098052	0.472893	0.08505	0.021468	0.192109	-0.413018	-0.428101	-0.011966	0.046411	0.370753	0.384774	-0.309645	-0.195577	-0.214028	-0.076401	-0.786302	-0.40563	-0.430787	0.034862	0.158074	0.296983	-0.10915	0.105067	-0.760278	-0.045977	0.208019	-0.063182	-0.039643
frg_291	0.394709	0.322048	-0.337365	0.283707	0.015158	-0.948836	0.02727	-0.270307	0.254434	-0.643303	0.926596	-0.410797	0.104953	0.180837	0.396093	-0.483767	0.63641	-0.195959	-0.727843	-0.698802	-0.921717	0.20246	0.278137	0.010127	-0.090186	-0.42291	0.194045	-0.051591	0.057048	1.00871	0.494437	-0.471191	1.01252	0.163846	-0.106316	0.171733	0.020344	-0.609429	-0.649226	0.032621	0.145778	0.647908	-0.59916	0.386386	-0.632048	-0.071216	0.688621	0.882502	0.32
frg_326	0.078435	0.803026	-0.163115	-0.466371	0.01321	-0.527675	0.26374	-0.07241	-0.080108	0.401955	-0.101068	0.154139	-0.484182	-0.196043	0.312865	0.200071	0.487058	0.203352	-0.084401	-0.187008	-0.210567	-0.344022	1.20889	-0.214129	-0.918793	0.562106	-0.406804	0.788482	0.360288	0.232591	-0.283942	-0.670297	0.571587	-1.52232	0.247231	-0.298264	-0.658185	-0.366101	-0.199098	0.302361	0.447135	-0.072792	-0.126802	0.531764	-0.255539	0.116146	-0.725735	0.144912	-0.03393
frg_205	-0.087985	1.13175	-0.147015	-0.686448	-0.171942	-0.049802	-0.460823	-0.189859	-0.79065	0.102173	-0.110264	-0.818544	0.080473	0.177711	-0.293435	0.278546	0.970783	-0.127384	0.227065	-0.064092	-0.201955	0.155738	-0.037625	-0.691461	-0.013314	-0.277828	0.339503	-0.584449	0.365865	-0.291805	-0.159394	0.163187	0.817732	-0.0987	-0.618577	-0.886651	-0.998033	-0.167704	0.784299	-0.381465	-0.055957	0.246175	-0.725618	-0.502056	-0.150838	-0.038787	0.997202	-0.843562	0.630879
frg_184	0.160957	0.487792	-1.04949	1.05635	-0.508	-0.579667	-0.119628	0.034359	-0.875666	-0.686402	0.537712	-1.27049	0.28529	1.30184	0.604325	-0.614572	0.487898	-0.282247	-0.869416	-0.539067	-0.514571	-0.477655	0.667626	-0.269811	0.738157	0.349779	0.083181	0.414555	0.132238	0.867285	0.728019	-0.286109	0.683304	0.2118	0.134445	0.270383	-0.622952	0.110837	-0.373805	-0.267406	-0.631499	0.60121	0.708639	0.608087	0.148724	0.20716	0.801848	0.612442	0.285987
frg_116	0.1947	0.434459	0.335213	-0.589742	-0.279495	0.205672	-0.573336	-0.405394	-0.441848	0.137408	-0.869243	-0.056394	-0.633753	-0.581363	-0.772004	0.093971	0.329883	-0.137235	0.200898	-0.05926	-0.074092	0.121366	0.734251	0.358691	-0.782906	0.687903	-0.342496	0.425848	0.109146	0.506098	0.204732	-0.43349	-0.371245	-1.11534	0.038653	-1.07547	-0.918259	0.023269	-0.754791	-0.102039	-0.47067	-0.274747	0.388612	0.347655	-0.331424	0.307475	-0.357494	0.220043	0.114535
frg_345	0.123639	0.760053	-0.465986	0.114084	-0.036133	-0.311259	-0.207611	-0.293628	-0.277669	-0.032642	-0.674342	0.193515	-0.303323	-0.27565	-0.262779	-0.183707	0.919358	-0.061939	-0.025961	-0.165752	-0.495015	-0.175097	0.199728	-0.325191	-0.719468	0.783588	0.228229	0.745834	-0.136536	-0.1862	0.382219	-0.746046	0.369003	-1.16289	-0.462225	-0.646667	-0.711676	0.065226	-0.303738	-0.002929	-0.055043	0.10496	0.110402	-0.036547	-0.23754	0.256384	0.044746	0.458986	-0.097839
frg_300	-0.061608	0.633988	0.241714	0.33963	-0.346198	0.164473	-0.488732	-0.811439	0.390277	0.148225	-0.22794	-0.330989	-0.318577	0.571394	0.620467	-0.022053	-0.80061	-0.779539	-0.500154	0.089437	-0.450502	-0.770973	-0.594619	-0.469987	-0.113511	0.287532	-0.035481	0.05515	-0.232696	-0.068299	-0.292417	-0.278105	0.528662	0.609537	0.501274	0.012075	-0.530669	-0.202177	-0.394817	-0.385698	-0.206709	-0.483409	-0.105342	0.318925	0.040478	0.775402	0.367916	-0.603872	-0.153542
frg_241	0.623419	0.425419	-0.274936	0.264088	-0.473549	-0.388071	-0.633837	-0.465818	-0.053522	-0.212001	-0.043254	-0.218373	0.196314	0.320774	0.150211	-0.164109	0.23846	-0.591012	-0.060855	-0.621377	-0.797072	-0.045323	0.211441	0.050148	-0.005535	0.188935	0.515089	-0.33217	0.392991	0.78615	0.303265	-0.626186	0.647631	0.09262	0.435792	-0.32278	-0.463626	0.270687	-0.417405	-0.332851	0.32559	-0.011759	0.111832	0.564891	-0.168848	0.168769	0.274281	0.541169	0.477823
frg_272	0.070876	-0.687994	0.079562	0.170667	0.3295	-0.098628	-0.494695	0.038832	0.341293	-0.522292	0.17177	0.317648	0.924081	0.130311	-0.05216	-0.786759	-0.042499	-0.480275	0.023632	-0.133555	-0.962777	-0.984675	0.1663	-0.444097	0.499907	0.006495	-0.000252	-0.413703	-0.139084	-0.23578	0.396399	0.106566	-0.092449	-0.688504	-0.394611	-0.589578	-0.3299	0.641607	-0.387022	0.160576	-0.111906	-0.163544	-0.523613	0.092173	0.262394	0.282316	-0.250016	0.35588	-0.343703
frg_403	0.636629	0.590181	-1.0845	-0.163308	-0.471105	0.033532	-0.412249	-0.989505	-0.987456	-0.345604	0.608479	-0.410457	-0.189671	-0.230451	0.102642	-0.141591	0.332488	-0.072421	-0.671063	-0.459833	-0.229053	-0.104982	0.817469	-0.349139	-0.324678	0.537797	0.031607	0.094949	0.601571	1.58604	0.277874	-0.163896	0.845593	-1.1029	0.004179	0.361212	-0.655335	-0.016967	-0.385386	0.682984	0.002363	0.344903	0.310671	0.339397	-0.591448	-0.137948	-0.014064	0.539275	0.165588
frg_365	0.664446	0.04222	0.498279	-0.224703	0.255097	0.577299	-0.162652	0.295612	0.229698	-0.502958	0.367238	-0.304641	-0.452235	0.420997	-0.516793	-0.191513	-0.001209	-0.47191	0.006659	-0.170675	-0.546253	-0.200492	-0.441517	-0.132038	-0.211108	-0.510555	0.024193	0.300121	-0.029111	-0.193219	0.059728	0.120632	0.00727	0.03477	-0.175723	-0.11904	-0.142688	-0.195337	0.374667	-1.09016	0.194785	-0.925518	-0.403986	0.311022	-0.081229	0.399894	0.308043	0.449888	0.3013
frg_299	0.644736	1.45315	-0.433833	-0.204593	-0.308439	0.181958	0.476786	0.365135	-0.535181	0.409358	-0.282795	-0.782301	0.234316	0.797716	-0.436513	-0.591721	0.219176	-0.168495	-0.298592	0.21988	0.184108	-0.012307	-0.047586	0.210024	-0.244454	-0.111829	-0.130566	0.487998	-0.325331	-0.959812	0.08252	0.123404	-0.102852	-0.24202	0.517987	-0.063856	-0.079231	0.207628	0.470631	-0.159282	-0.287409	-0.565709	-0.64783	0.135041	0.694661	0.844577	0.196602	-0.571488	0.364189
frg_298	0.838754	0.364336	0.26743	-0.142434	-0.131885	-0.255895	0.845802	-0.106327	-0.119895	0.382213	-0.275312	-0.584774	0.664161	0.63126	0.22958	-0.6208	0.648558	-0.04907	-0.031047	-0.333469	0.477899	0.135139	0.027913	0.571763	0.33152	0.483684	0.229003	0.436922	-0.916577	-0.236139	0.311861	0.120557	-0.283094	-0.112364	0.401748	-0.090916	0.211393	-0.316934	0.390674	0.174011	-0.352318	0.275856	-0.153643	1.0129	0.584918	1.00958	-0.132053	0.62062	0.613157
frg_235	0.621312	-1.24943	0.445575	-0.051569	0.278494	0.591579	-0.925075	0.283945	0.670445	-0.767314	0.032419	-0.025283	0.221903	-0.7561	-0.813574	-0.671528	0.185381	-0.746087	0.010168	-0.294334	-0.785713	-0.986914	0.959342	-0.075019	0.503293	-0.825092	-0.291781	-0.902532	0.116997	0.455488	0.728974	0.740986	-0.215215	-0.80334	-0.074247	-0.507361	-0.356626	0.77288	-0.393764	0.592615	-0.547509	-0.25139	0.632523	-0.049332	0.257621	-0.433757	-0.601828	0.890509	-0.29364
frg_772	-0.285769	-0.01767	-0.228334	-0.033042	0.471593	0.520171	0.07437	1.08847	-0.362171	-0.755993	0.650913	-1.14187	-0.326939	0.169491	-0.076946	-0.110939	-0.15588	0.480807	-0.871345	0.616285	-0.500923	-0.444638	0.2302	-0.052232	0.007146	-1.17724	0.493436	0.381433	-0.646225	-0.523708	0.595538	0.323015	1.2886	0.321917	-0.742295	0.257788	-0.259682	-0.125272	0.039197	0.229682	-0.041142	-0.238	-0.629048	0.515023	-0.345132	0.15474	-0.022149	-0.169643	-0.455479
frg_329	-0.902685	0.154915	-0.134387	-0.081651	-0.566444	-0.575507	-0.083304	0.060498	-0.334433	0.047308	0.021479	-0.239113	-0.78838	-0.603198	0.507952	-0.36387	-0.799321	-0.295688	-0.232676	0.678512	0.056138	-0.10641	0.401038	-0.768758	-1.0684	-0.211693	0.171085	0.391657	0.46379	0.686074	0.370594	-0.271409	0.086919	0.446904	-0.191655	0.055295	-0.241254	-0.10266	0.762035	0.749564	0.25907	-0.073583	0.098772	1.026	0.435557	-0.072169	0.199957	-0.632341	0.331169
frg_715	0.838184	0.19336	-0.141727	-0.404737	-0.181113	0.438184	-0.119012	0.195465	-0.255354	-0.17179	0.55339	-0.657137	0.281693	-0.455419	-0.033262	-0.242115	-0.128766	-0.95212	-0.423575	0.137175	-0.515073	-0.976158	0.189991	0.047775	-0.153436	-0.955969	-0.004467	0.327105	-0.680755	0.074447	0.723252	0.431224	-0.223207	-0.506555	0.092766	0.13191	-0.197851	-0.024888	-0.175323	0.149243	-0.393909	0.187868	-1.66064	0.545126	0.483847	0.612918	-0.691063	0.431079	-0.244723
frg_100	0.612474	0.654469	0.106191	0.179947	-0.132933	0.105559	0.073649	0.539638	0.422856	0.248121	0.004134	-0.273165	0.44417	0.792102	0.332639	-0.383813	-0.096503	-0.389739	0.681853	-0.01646	-0.29778	0.676938	0.229402	0.006794	-0.261245	0.144836	0.020427	0.86552	-0.328771	0.048068	-0.439821	-0.085721	-0.422687	-0.498592	0.164508	-0.220733	-0.067077	0.172114	0.161593	-0.146519	0.070441	-0.414706	0.128893	0.520131	-0.031924	-0.060966	-0.050076	-0.408893	0.182109
frg_121	0.254895	0.510317	0.438131	0.065667	-0.122713	-0.076147	-0.031855	-0.377535	0.394664	-0.069039	0.061061	-0.165414	-0.126003	-0.652022	-0.005245	-0.331933	0.57275	-0.572758	0.728892	-0.349722	0.205301	0.096912	0.185353	-0.727401	-0.292526	0.825227	0.257901	0.525394	-0.345236	0.816503	0.138552	-0.184142	0.488766	-0.764892	-0.736537	-0.287814	-0.33267	0.074673	-0.3238	0.208027	-0.303673	-0.146823	-0.053853	0.782076	-0.323478	0.419537	-0.786158	0.594112	-0.302374
frg_305	0.25074	0.393667	0.042311	-0.340801	-0.082632	-0.447155	-0.103844	0.033018	0.608612	-0.083199	0.185776	0.386296	0.452107	0.40765	0.816181	-0.236167	0.407128	0.454532	-0.578716	-0.213762	-0.057259	-0.358052	0.06112	-0.529574	-0.275031	-0.072454	-0.132717	0.314591	-0.374016	0.405784	0.082069	-0.337046	0.211029	-0.091656	-0.327311	0.223955	-0.506883	-0.287736	-0.22135	-0.279398	0.443156	0.183873	0.025373	0.779695	-0.598014	0.051506	-0.463586	0.242682	0.391233
frg_801	0.061373	0.295693	-0.181727	-0.101134	-0.115628	0.996199	-0.332811	-0.68734	0.108165	-0.526888	0.041053	-0.997937	-1.01825	-0.498002	0.183423	0.62342	0.076141	0.893927	-0.29403	-0.119151	0.834735	-0.507992	-0.334463	-0.850088	0.01795	-0.147111	0.877131	0.770291	-0.093564	0.017716	-0.537139	0.204864	0.8569	-0.171378	-0.296822	-0.547349	0.04116	0.039875	0.467808	0.312199	0.204993	-0.690448	-0.184842	0.54748	0.640364	0.028637	-0.293999	-0.564939	-0.116888
frg_244	0.061167	0.514067	-0.583479	-0.521141	0.044552	0.457968	0.2089	0.197008	0.104238	0.191454	-0.351901	-0.65275	-0.0003	0.301423	-0.206603	-0.202997	-0.433983	0.634835	-0.207053	-0.239573	0.234098	0.015674	0.246848	-0.324207	0.478569	-0.232287	0.288457	0.743573	0.091955	0.008911	-0.737428	0.070709	0.22573	-0.764745	-1.02744	-0.292859	-0.861774	0.215207	1.02641	-0.148366	0.49752	0.751914	0.17663	0.236193	-0.252696	0.429636	0.325922	-0.676802	0.029608
frg_208	0.08575	0.687543	0.195182	0.007307	0.086493	-0.518105	-0.022288	-0.985148	0.10422	0.283012	0.080382	0.682012	0.946598	0.066211	0.025684	-1.00458	0.394339	-0.321181	0.119825	-0.034077	-0.611245	-0.595622	0.118213	-0.479713	-0.248713	0.450336	0.353038	0.239384	-0.257759	0.027455	0.431412	-0.403226	0.209445	-0.794655	-0.078118	-0.243465	-0.903339	-0.016353	0.326708	0.080661	-0.286507	0.147491	-0.008033	0.482736	0.169385	0.068137	-0.092454	-0.265937	0.044187
frg_99	0.674757	0.78043	0.324551	-0.327228	-0.034551	0.211978	0.015712	0.207448	-0.117312	0.014725	-0.545071	-0.360066	0.395053	0.61612	-0.108939	-0.423618	0.347356	-0.076039	0.192296	0.056299	0.155772	0.313337	0.731259	0.556681	0.282896	0.255541	-0.414948	0.358778	0.035011	-0.519268	-0.036138	0.26342	0.112641	-0.438563	0.134336	-0.62422	0.312935	0.04017	-0.271148	-0.525092	-0.330198	0.075264	0.173861	0.442089	0.007009	0.093954	0.536627	-0.300384	0.120795
frg_361	0.785316	0.745627	-0.011081	0.092254	-0.456411	0.192808	-0.195952	-0.335699	-0.085284	0.113013	-0.053846	0.41353	0.026677	0.37518	-0.261232	0.379028	-0.019496	0.375364	-0.276746	0.009333	0.786602	0.404504	-0.238783	-0.314878	-0.163301	-0.187688	0.411391	-0.358816	-0.641789	0.389558	-0.045792	0.090316	-0.106882	0.14656	-0.042599	0.14609	-0.861264	-0.258374	-0.545615	-0.034226	0.155021	0.305858	0.441287	0.555521	0.089739	-0.261735	0.443705	-0.115674	0.32706
frg_242	0.647133	0.241556	0.132059	0.131375	-0.65919	-0.634322	0.061893	-0.361213	-0.269668	-0.1168	0.444373	-0.409306	0.722922	-0.216268	-0.109112	-0.321946	0.616519	-0.45245	-0.675612	-0.64099	-1.24729	-0.374153	0.407899	-0.199385	-0.010134	0.037701	0.225753	-0.353919	0.294544	1.09102	0.236128	0.033095	0.564732	-0.376436	0.027674	0.118321	-0.396263	0.519486	-0.242759	-0.273819	-0.154403	0.932665	-0.093901	0.385428	-0.457168	0.233388	0.437081	0.084152	0.708887
frg_288	0.493336	0.218762	0.608899	-0.393452	-0.503247	-0.469871	0.494254	-0.011753	-0.085664	0.407343	0.006013	-0.145744	-0.102697	0.114082	-0.325503	0.135583	-0.056409	-0.730743	-0.187794	0.074371	0.421722	0.059866	0.400397	-0.097652	0.194191	0.335578	0.216281	-0.558255	0.079804	0.378994	0.261528	-0.130917	-0.123564	-0.201798	-0.074478	-0.522312	-0.336275	-0.454688	0.226463	-0.062646	0.280342	0.154138	-0.208477	-0.122325	-0.412962	-0.034374	0.48365	-0.621524	0.354151
frg_289	-0.12471	-0.080787	0.048462	0.205068	-0.073814	0.446716	-0.08241	-0.130854	0.708058	-0.128308	-0.820093	-0.484308	-0.680919	0.502017	0.161854	0.65034	-0.181461	-0.340814	-0.18993	-0.046853	-0.45469	-0.062245	0.250638	0.015363	-0.175614	-0.114734	-0.146796	-0.129589	-0.693969	-0.938077	-0.532691	-0.097512	0.435787	0.270295	0.140498	-0.195352	-0.231169	0.317385	-0.178519	-0.142091	0.137061	-0.997027	0.324291	0.386326	0.30813	0.523566	0.931624	-0.380632	0.274674
frg_892	1.20606	0.931852	1.46101	0.603773	-0.525755	0.12452	-0.621857	1.4664	0.384335	0.329441	0.06334	0.290142	0.748783	-1.20199	-0.187884	-1.42983	-0.557478	-1.71298	0.536119	0.075468	-1.30341	-0.656934	0.038036	-0.672	0.076573	-0.600823	-0.627752	0.319191	-1.06961	0.140561	1.14427	-0.442429	0.081098	-0.257159	-0.171422	-0.559175	-0.519591	0.14479	-0.297679	-0.170129	-0.20414	-0.145732	-0.558012	-0.360041	0.335857	0.055873	-0.466356	0.83308	0.536644
frg_592	0.256156	0.565947	-0.149347	0.036637	-0.507377	0.69409	-0.501259	0.666739	-0.411322	0.425795	-0.742144	-0.161731	-0.249672	0.366551	0.520322	-0.646389	-0.488327	0.05842	0.602103	-0.687803	-0.647031	0.786516	-0.190295	-0.200653	0.379827	0.557971	-0.900745	0.366694	-0.591866	-0.280758	0.685969	-0.68166	-0.532494	-0.829617	-0.255849	-0.302784	-0.769747	0.751293	0.047332	0.078224	0.024798	0.119605	-0.147651	0.363665	0.04862	-0.062278	-0.28274	0.330125	-0.070534
frg_1292	0.278268	0.14718	-0.172899	0.53631	-0.433376	0.554308	-0.19089	0.538418	-0.074943	-0.55329	0.004964	-0.513394	0.037887	0.262765	-1.20459	-0.136177	0.194657	-0.189588	-0.895027	-0.021112	-0.522818	-0.255493	-0.62837	-0.052339	0.270457	-0.694692	0.18851	0.611767	0.292215	0.189847	-0.317151	-0.685188	0.454744	0.261707	-0.102755	-0.566337	-0.197807	0.390074	-0.878917	-0.228322	-0.368575	0.673712	0.180829	0.014415	0.528277	0.638764	0.795365	0.899056	0.19077
frg_283	0.659586	0.768028	-0.627298	-0.346165	0.120081	-0.640464	-0.016328	-0.606066	0.011308	0.579877	-0.243783	-0.273103	-0.411816	-0.545005	-0.066784	-0.29074	0.181215	-0.043514	-0.286371	-0.242036	-0.236546	-0.311868	0.13114	-0.612909	-0.512905	0.835718	0.442251	0.67845	0.213223	0.468395	-0.148427	-0.33121	0.575694	-1.23624	-0.090193	-0.272123	-0.742223	0.044476	-0.640346	0.10198	0.062191	-0.460456	-0.001698	0.246753	-0.48257	0.200272	-0.868663	0.006896	-0.218301
frg_416	0.550867	-0.016133	-0.355919	0.112334	-0.953208	-0.05442	0.053478	-0.423451	-1.26189	0.016457	-0.06776	-0.049338	0.225396	0.496506	-0.392328	0.347621	0.019926	0.190484	-0.209973	-0.203345	0.338257	0.129079	-0.050123	-0.593768	-0.020138	-0.847234	-0.033277	-0.213459	-0.112786	0.106811	0.047537	0.269406	0.12793	-0.018211	-0.319128	0.204922	-0.860282	-0.133081	-0.263628	0.073111	0.111569	-0.003093	-0.33718	0.020861	0.144015	0.199391	0.408008	-0.160668	0.073024
frg_452	0.673867	0.551755	0.574577	-0.064928	0.006915	-0.137833	-0.43869	0.827499	-0.922881	0.059148	-0.160363	-0.703365	-0.926842	-0.830269	0.248098	-0.712885	-0.485752	-0.129988	0.266041	0.278568	-0.127225	-0.062992	-0.620871	-1.10988	-0.16938	0.774717	-0.024027	0.051551	-0.187703	0.49772	1.36677	0.338874	-0.49782	-0.85835	0.023591	-0.41203	0.341512	0.382451	1.02274	-0.125492	-0.497202	-0.422227	-0.419487	0.535019	-0.258656	0.069646	-0.741423	0.245963	-0.373098
frg_429	0.864394	0.544732	1.32728	0.134735	-0.488676	-0.098511	-0.793017	0.702625	0.313739	-0.010803	-0.231088	0.195911	0.572047	-1.08062	0.068177	-0.543268	0.29618	-1.18528	0.044186	0.207608	-1.67748	-0.655432	0.432054	-0.062817	-0.079979	-0.503962	-0.565546	0.096811	-0.946689	-0.001417	0.388313	-0.439698	-0.163045	0.154822	-0.243022	-0.184275	0.138237	0.099284	-0.283728	-0.909343	-0.113847	0.690044	-0.782431	0.212409	0.473491	0.202372	-0.693622	0.165913	-0.019307
frg_848	0.784141	0.744995	1.24864	0.368601	0.423582	0.849518	0.358181	0.559175	-0.135198	-0.04488	0.006975	-0.46565	0.761873	0.292776	-0.971645	-1.45763	-0.30439	-0.322834	0.214525	-0.355638	-0.005063	0.128638	-0.809594	-0.359069	0.512728	0.156057	0.179392	0.640004	-0.521225	-0.328584	0.021868	-0.869727	0.757504	-0.120279	0.110967	-0.047491	-0.55479	0.416071	0.041889	0.094136	0.081251	0.285719	-0.907001	0.267865	0.037122	0.260878	0.166999	-0.386311	0.268667
frg_106	0.974352	0.012207	-0.086239	-0.421431	0.530043	0.309247	-0.301035	0.502779	0.284892	-0.640559	0.034361	-0.608579	0.338018	0.561574	-0.532786	-0.052653	-0.204407	0.433909	-0.336567	-0.48762	-0.258704	-0.277542	0.026377	-0.213611	0.366269	-0.446744	-0.015809	0.516877	-0.00235	-0.714656	-0.207031	-0.017555	0.16342	-0.17878	0.529673	-0.04582	-0.351292	-0.031217	-0.334315	-0.886515	0.02236	-0.342032	-0.84583	0.10748	0.239181	0.57051	0.028122	0.272978	-0.134692
frg_253	0.38761	0.350636	0.317252	-0.068874	0.220842	-0.509779	-0.222936	-0.027705	0.347623	0.227475	0.318291	-0.140978	-0.168643	0.116792	0.089908	-0.447146	-0.178617	-0.474115	-0.226969	0.163367	0.132614	0.360179	0.102306	-0.585825	-0.056611	-0.067813	-0.068889	-0.312049	-0.074003	0.226746	0.739206	-0.364477	0.462061	0.093138	-0.645847	-0.149808	-0.583556	-0.107339	-0.117	-0.177406	-0.118722	-0.252434	-0.042743	0.19889	-0.317774	-0.451694	0.090351	0.003414	-0.019919
frg_447	-0.192776	0.648846	0.001726	-0.167959	0.194914	-0.130382	0.215267	0.05769	-0.330465	-0.318301	-1.11608	-0.125135	-0.878328	-0.247976	-0.482138	-0.508982	1.15733	0.082018	-0.163673	-0.212898	-0.802312	-0.135105	0.556267	-1.3188	-0.108076	1.05248	0.532632	0.921379	0.054286	0.82345	-0.135726	-0.544549	0.186729	-1.77267	-1.12523	-0.823351	-0.847404	0.078518	0.502491	-0.038025	0.218018	-0.307931	0.372703	0.488375	-0.171113	-0.086238	-0.109766	0.410009	-0.265373
frg_128	0.418285	0.836819	0.231453	-0.167734	0.17709	0.524205	-1.04665	-0.295314	-0.280162	-0.358767	0.605239	0.070965	-0.070346	0.168988	0.082252	-0.133077	-0.98736	-1.18944	-0.263221	0.126626	-0.616482	-0.718451	-0.425502	0.068147	0.176232	0.080351	-0.364842	-1.45358	-0.014576	0.543246	0.626967	-0.115251	0.016297	-0.103579	0.144601	0.168593	-0.285459	0.263856	0.110376	-0.634599	0.633758	0.568231	-0.146067	0.059908	0.070646	0.149998	0.03929	-0.269961	0.158873
frg_118	0.117715	0.202465	0.113102	-0.254592	0.529291	-0.183947	-0.320723	-0.032267	0.165021	0.134565	-0.003838	-0.633033	0.174022	0.418781	-0.621248	0.267635	-0.724729	0.112472	0.202181	-0.465375	-0.132471	0.067968	0.414459	-0.445856	-0.130107	-0.545916	0.70876	0.213098	-0.314611	-0.112703	-0.331295	0.161248	0.584392	-0.000903	-0.334774	-0.108975	-0.563638	0.934676	-0.269621	-0.171621	0.238242	0.006228	0.193928	-0.281988	-0.198911	0.763254	0.08449	-0.820361	0.17595
frg_290	0.383749	0.330335	-0.199917	0.443081	-0.834386	0.57558	-0.03049	-0.594725	-0.447851	0.855316	-0.2365	0.435701	0.524673	-0.011445	-0.408219	0.433224	-0.45235	-0.180179	-0.154926	-0.773297	-0.248321	0.070063	-0.148839	-0.508758	0.016635	-1.05943	0.421184	-0.582952	-0.269232	0.563032	-0.268235	0.121941	0.218273	-0.093438	-0.605066	0.005849	-0.810086	-0.356309	-0.605058	0.327581	0.42145	-0.09101	-0.094216	0.249657	0.175947	0.317441	0.625058	0.203822	-0.060955
frg_274	0.487343	0.431931	-0.294246	-0.373254	-0.605339	-0.506244	-0.264334	0.100939	-0.534376	0.163446	-0.260061	0.257127	0.308984	0.243773	0.196734	-0.276703	0.178472	0.112567	0.459368	-0.017602	0.155305	0.333664	0.552452	-0.542855	0.389389	-0.444501	0.465781	-0.366768	0.263468	0.291296	0.043975	0.090621	0.315638	-0.168197	-0.485238	-0.518134	-0.194984	-0.053737	0.097279	-0.287673	-0.25248	0.009488	0.142877	-0.078098	-0.019385	0.256518	-0.063965	-0.258295	0.002776
frg_286	0.290391	0.223004	-0.443535	-0.097227	-0.836297	-0.597935	-0.01409	-0.007637	-0.215583	0.103357	-0.191432	-0.129058	0.245632	0.365938	0.080997	0.346607	0.052157	0.181283	-0.161821	-0.159372	-0.368352	0.390046	0.871257	-0.314778	0.348203	-0.189994	0.277698	-0.225322	-0.289034	0.609798	-0.096726	0.24385	0.529535	-0.106162	-0.268338	-0.649669	-0.364849	-0.007496	0.30036	-0.345254	-0.02211	0.354265	0.388773	-0.072269	0.279383	0.500395	-0.122259	-0.315801	0.052699
frg_399	-0.073984	0.820476	-0.133143	-0.550386	0.4728	-0.411068	-0.039338	-0.173525	0.463843	-0.009868	-0.344961	0.284961	-0.102301	-0.244888	-0.296993	-0.815649	0.984993	0.197926	-0.062812	-0.293453	-0.482366	-0.385087	0.497804	-0.580914	-0.473082	0.331548	0.106429	0.811381	0.024209	0.592525	0.006652	-0.516105	0.358755	-1.34283	0.070692	-0.123069	-0.013472	0.252581	-0.271656	-0.234975	0.017915	0.41583	-0.259098	0.360247	-0.113146	0.300871	-0.55432	0.383572	-0.56807
frg_775	1.18122	0.035745	0.40967	0.381203	0.158629	-0.787756	0.115383	0.187465	-0.577376	0.417873	0.249143	-0.143294	0.751128	-0.038984	-0.643854	-0.151186	-0.149236	-1.82444	-0.232412	0.318965	-0.397169	-0.019947	-0.274267	-0.661151	0.437176	-0.528379	-0.853612	0.408594	-0.263975	1.0225	0.19856	0.3178	0.156656	-0.988621	-0.473178	0.164313	-0.851464	0.571688	0.500241	0.033529	-0.177644	-1.15469	0.168287	0.258127	0.113894	0.247976	-0.627786	0.783486	0.245794
frg_729	0.533757	0.560524	0.787517	-0.085458	0.141399	0.648648	-0.083764	0.462788	-0.089954	0.172888	0.006669	-0.426169	0.355459	0.314889	-1.07549	-1.07582	-0.480286	-0.080686	0.209896	-0.591357	-0.151063	0.093375	-0.226099	-0.53879	0.438448	0.019712	-0.028472	0.671503	-0.41143	-0.308157	0.010673	-0.418122	0.868865	-0.112929	0.318849	-0.21998	-0.570636	0.417601	0.106341	-0.399373	0.078319	0.262197	-0.658379	0.048084	-0.007386	0.434237	-0.026266	-0.583483	0.17349
frg_508	0.581792	0.121073	0.225212	-0.180716	0.349604	-0.399521	0.464001	-0.715972	-0.6214	0.161864	-0.59575	-0.04429	0.241417	-0.126777	-0.530393	-0.636959	0.346948	-0.024212	0.3278	-0.230984	-0.386092	-0.305941	0.557241	-0.522666	-0.136353	0.627422	-0.105032	0.476923	-0.26237	0.294386	0.623226	-0.522404	-0.212024	-1.76675	0.232831	-0.273081	-0.849313	-0.244724	-0.108118	-0.051502	-0.275868	-0.117991	0.476016	-0.28569	0.036743	0.241794	-0.495046	0.680087	0.160276
frg_431	0.573419	0.537875	0.745256	-0.117436	-0.752342	-0.105777	-0.740744	0.355662	0.527885	-0.576516	0.267764	0.332581	0.02922	-1.36225	0.439608	-0.876888	0.509176	-0.680731	0.19245	0.122535	-1.09139	-1.1005	0.557881	-0.146241	0.356031	-0.35856	-1.17965	0.175548	-0.177445	0.693839	0.306081	-0.398163	0.027453	0.104446	-0.681734	-0.151906	-0.370732	-0.124297	-0.492842	-0.092282	-0.01135	0.389794	-1.07854	0.755739	0.36121	0.170165	-1.12095	0.375196	-0.041044
frg_441	0.345827	0.393596	0.600614	0.490424	-0.667764	0.837025	0.081179	-0.2954	-0.046467	0.296359	0.084489	0.354424	-0.180577	-0.630101	-0.640028	0.242648	-0.00074	-0.382258	-0.029134	-0.228279	0.276399	0.57794	0.119481	-0.221699	-0.134629	-0.677274	0.729512	-0.582041	-0.965041	0.636432	-0.530325	0.327769	-0.063471	0.114982	-0.477235	-0.021816	-0.46128	-0.049576	-0.164956	-0.26037	0.016332	0.148074	0.049033	0.383016	-0.107826	-0.19868	0.232221	0.177257	0.20923
frg_472	0.220807	0.357033	-0.494564	0.13185	-0.556206	0.285505	-0.709952	0.347711	-0.426523	0.228975	-0.875494	0.043726	-0.223736	-0.137256	0.424684	-0.689468	-0.036894	-0.209957	0.523691	-0.794505	-0.541196	0.391734	0.101578	-0.367289	-0.130729	0.672832	-0.308561	0.622922	-0.406553	-0.510346	0.740558	-0.75761	-0.294728	-1.21182	-0.350053	-0.446757	-0.534734	0.263443	0.032382	-0.080028	0.095278	0.087816	0.082073	0.091267	0.005885	-0.016797	-0.475633	0.528485	0.017596
frg_162	0.876102	-0.16317	0.592528	0.183803	0.250186	-0.171857	-0.742021	0.107506	0.846016	-0.101101	-0.409742	0.251043	0.498963	-0.698934	0.804299	-0.157659	-0.600755	-0.44115	0.073614	0.756303	-0.357542	0.055964	0.086808	-0.371388	0.377589	0.128642	0.095528	0.536625	-0.463224	0.774873	0.190649	-0.387068	-0.06788	-0.250416	0.170312	-0.665312	-0.806226	0.213791	0.096164	-0.182823	-0.194813	0.295619	-0.051951	-0.006765	-0.120888	-0.393714	-0.184629	-0.179719	0.034524
frg_755	0.708581	0.600789	-0.657145	-0.277326	0.254261	-0.025888	-0.561458	0.517146	-0.333357	0.439771	-0.283528	0.44912	0.066767	-0.565264	-0.24784	-0.221359	0.395448	0.35898	-0.23083	-0.359298	-0.538591	-0.174386	-0.465325	-0.341999	-0.962086	0.077365	0.442123	1.14212	-0.564736	0.513648	0.928183	-0.325506	-0.084235	-1.40165	-0.758618	-0.796365	0.442439	1.04789	-0.60025	-0.265054	-0.564135	-0.029344	0.076965	0.56221	-0.40643	0.994579	-0.58883	0.474176	-0.533642
frg_760	1.41718	-0.507763	-0.080124	1.34692	-0.293861	-0.729827	-0.491094	0.733579	0.15088	-0.688835	0.378695	0.19979	0.597565	-0.28282	0.577436	-0.207333	0.027913	-0.967452	-1.29362	0.186122	-1.66351	0.304838	0.614128	0.013591	0.435005	-0.231475	-0.804257	-0.094354	-0.110435	1.85227	0.503154	0.064014	0.162216	-0.051942	0.039059	0.131708	0.595841	0.833534	-0.003671	-0.331384	-0.035866	0.139361	-0.689122	0.892641	0.826035	0.025874	-0.07798	0.704696	0.134287
frg_783	0.166197	1.06358	-0.219381	0.275027	-0.316989	0.139451	-0.356254	0.20836	-0.668418	0.289066	0.524557	-0.573876	-0.156669	0.373389	-1.06242	-0.360128	0.505142	-0.141281	-0.937536	-0.66822	-0.575879	-0.064971	-0.39205	0.265218	0.172993	-0.690063	0.068278	0.328777	0.332642	0.123379	0.640021	-0.621611	0.844056	-0.032283	0.551051	0.056835	-0.499901	-0.022812	-0.115473	0.047784	-0.128344	0.394894	-0.318117	0.43121	0.878437	0.277165	0.503409	0.47913	0.76268
frg_1480	0.772177	0.572962	1.27988	0.021798	-0.116904	-0.168801	-0.160506	0.714592	-0.487958	-0.427357	-1.07207	-0.423677	0.558416	-1.53619	0.706945	-0.732665	-1.04949	-1.04261	0.060254	-0.518673	-0.914406	-0.431277	0.011219	-0.607384	0.57953	-0.282319	-0.80836	0.966998	0.428153	0.299513	0.381952	-0.118268	-0.553051	-1.13068	0.48996	0.329513	-0.889401	0.901818	0.016845	-1.36336	-0.261893	-0.313544	-0.065815	0.320492	0.609357	0.446274	-1.1457	0.039537	-0.237825
frg_515	0.948795	-0.985241	0.148824	0.333871	0.231384	0.132622	-0.381612	0.03661	-0.139776	-0.796791	0.657841	-0.146221	1.2101	0.509918	0.456155	-0.275219	-0.035742	-0.821977	-0.429664	0.369102	-0.671565	-1.39692	-0.114556	-0.05982	0.605534	-0.322824	-0.333785	-0.58208	-0.729281	0.134659	0.673234	0.679626	0.041008	-0.503095	0.062176	0.549955	-0.3355	0.510877	-1.65904	0.456914	-0.529877	-0.51751	-0.343366	0.204065	-0.073516	0.735255	-1.00552	0.901095	-0.117822
frg_911	0.351833	0.717785	0.571057	0.112007	-0.132804	-0.101256	-0.485687	0.774693	0.677761	-0.409783	-0.041628	-0.145194	0.405084	-0.614928	0.331185	-0.901499	0.148317	-0.438439	0.073918	0.276622	-0.741613	-0.928549	-0.246809	-0.062964	0.529729	-0.337304	-0.267466	0.172829	-0.216476	-0.231835	-0.082893	-0.380503	0.350705	-0.744363	-0.065202	-0.491718	-0.333622	0.250346	-0.298986	-0.396189	0.383204	0.197663	-1.17762	-0.007148	0.662288	-0.019201	-1.09842	-0.184743	0.280219
frg_524	0.504076	-0.099391	0.940812	0.941867	0.099111	0.224295	0.02664	0.255008	0.488643	0.024298	0.684508	0.359443	0.146645	0.781672	-0.394175	-1.71503	-0.075627	-1.40444	-0.384468	-0.072377	-1.42125	0.47657	-0.224183	-0.818472	0.583552	-0.490334	0.183138	-1.00688	-0.384746	0.362214	1.60258	0.310154	0.929692	-0.435856	-0.668803	-0.000672	-0.192672	0.671317	-0.365178	-0.546305	-0.504656	-0.768891	0.163748	-0.108649	0.128671	-0.607059	0.105624	1.05076	-0.182099
frg_774	1.29395	0.165965	1.02879	0.485699	-0.268222	-0.567176	0.268415	0.382259	-0.501282	0.108189	0.050121	-0.37377	1.07064	-0.555688	-0.216317	-0.654948	-0.509531	-1.14058	0.132939	0.217813	-0.538502	-0.201196	0.214016	-0.408882	0.864594	0.032692	-0.717164	0.227326	-0.095063	1.13689	0.402968	0.184565	-0.628302	-0.614715	-0.510155	-0.000438	-0.80198	0.58315	0.691064	-0.202323	-0.62976	-0.740056	0.489194	0.658343	-0.186193	-0.04713	-0.288751	0.394579	-0.159098
frg_497	0.058749	1.02567	-0.549016	-0.049929	-0.769569	-0.033664	-0.0902	0.101409	-0.182213	1.7e-05	-0.111735	-0.129098	0.01148	-0.202014	0.51171	0.173781	-0.378262	0.274421	-0.631001	-0.602627	-0.184882	-0.727527	0.069533	-0.19514	-0.249758	0.284338	-0.326471	0.242893	-0.110825	-0.547265	-0.023654	-0.271305	0.668764	-0.285895	-0.317341	0.081424	-0.790853	-0.450751	0.01107	0.027911	0.132484	-0.123924	-0.446081	-0.00321	0.140153	-0.641525	0.050492	-0.506114	0.302309
frg_325	0.113584	-0.005921	-0.260072	0.268054	-0.422732	0.305506	0.179123	0.06865	0.00315	-0.111342	-0.006289	-0.212014	0.174693	0.421601	-0.514177	0.173228	-0.506305	-0.20505	0.36528	0.057404	0.079695	-0.105396	0.136028	-0.096969	0.714455	-0.444525	0.264129	0.489451	-0.008591	-0.162055	-0.02447	0.018705	0.783478	-0.061864	0.17773	-0.253205	-0.603838	-0.307087	-0.14469	-0.058345	-0.315205	0.097291	0.022094	0.83245	0.11926	-0.090159	-0.017162	-0.282246	-0.217454
frg_1161	0.337189	0.594669	-0.780485	-0.205581	-0.0059	0.033962	-0.583022	0.182213	-0.561404	0.410677	-0.005709	0.836013	-0.051947	-0.819001	-0.248926	-0.011243	0.565715	0.737577	-0.379861	-0.395401	-0.745498	0.265889	-0.060425	-0.466362	-0.93051	0.330138	0.366104	1.1157	0.13497	0.502032	0.499876	-0.485726	0.420301	-1.62943	-0.493786	-0.418711	-0.201658	0.261517	-0.566886	0.364723	-0.151693	0.17785	0.04389	0.207134	-0.277439	0.599007	-0.593511	1.14978	-0.576661
frg_486	0.236608	0.251905	1.13448	-0.289855	-0.466336	-0.534178	-0.342852	-1.19187	0.268021	0.004816	-0.200687	0.00902	0.346932	-0.4908	-0.237563	-0.473998	0.060783	-0.104516	0.393904	0.191954	-0.363864	-0.200691	0.416956	-0.826375	-0.14243	0.213543	1.2614	-0.467695	-0.86872	0.987565	0.381295	0.373276	0.174503	0.189665	0.225764	-0.550875	-0.33601	-0.042903	-0.590594	0.092476	-0.366264	0.639303	-0.326606	-0.193025	-0.282417	-0.100826	-0.58628	-0.504991	0.111743
frg_391	0.550418	0.517572	0.832256	-0.085542	-0.827121	-0.136242	0.778408	-0.216405	-0.184081	0.186207	-0.177779	-0.220293	-0.01864	0.649945	-0.25217	-0.879062	0.185825	-0.283155	-0.061933	-0.071895	-0.271616	-0.357152	-0.283392	-0.348845	-0.105658	0.433656	-0.039185	-0.234397	-0.12795	0.807233	0.006341	0.207842	-0.599607	-0.176869	0.330565	0.296064	-0.711172	-0.855475	-0.560147	0.145205	0.409992	0.174985	-0.284942	0.241037	-0.360161	0.361279	-0.283646	-0.1699	0.200255
frg_394	0.305593	0.574914	0.621783	0.062489	-0.14419	-0.203598	0.420981	0.041669	0.496082	0.302608	0.395653	-0.804692	0.194221	0.688743	0.720361	-0.444433	-0.404921	-0.241215	-0.067841	-0.396775	0.292667	-0.411569	0.159595	-0.343213	0.356617	0.365415	-0.320924	-0.387622	-0.849324	1.12067	-0.098684	0.00493	0.07629	-0.157299	-0.059371	1.24246	-0.072272	0.057082	-0.66214	-0.162499	1.01747	0.510268	0.109934	0.285482	-1.07923	0.200495	-0.041175	-0.07656	0.337722
frg_343	0.275642	0.022283	-0.154641	-0.693862	0.318697	-0.002221	-0.271422	-0.020144	0.018397	-0.424092	-0.507061	-0.319194	-0.444587	-0.563153	-0.404993	-0.159776	0.274273	0.179301	0.182094	-0.350727	0.103668	-0.492133	0.579089	-0.158553	-0.70403	0.393026	0.894593	0.955479	0.644827	0.674271	0.343861	-0.120432	0.354729	-1.24162	-0.350115	-0.439187	-0.739915	0.191072	-0.219269	-0.366842	-0.202919	0.077665	0.567165	-0.428107	0.008168	0.499795	-0.573058	0.477942	-0.540452
frg_516	0.294026	-0.145759	0.424779	-0.182252	-0.417617	0.15341	-0.50828	0.404526	0.205392	-0.050737	0.514797	-0.155501	-0.279381	-0.374222	0.243701	-0.155015	-0.315177	-1.31967	0.242028	-0.03544	-1.12204	-1.23473	1.20509	0.052319	0.395176	-0.714174	-0.990935	0.112021	-0.577116	-0.177506	0.387481	0.542322	-0.051283	-0.718166	0.497848	-0.215097	-0.415088	0.406068	0.273964	-0.15672	-0.0152	-0.250143	-0.307089	0.001453	-0.064269	-0.157645	-0.462756	0.016042	0.815916
frg_888	0.053844	0.438626	0.351072	0.307876	-0.057675	0.29096	-0.040394	-0.559302	-0.267564	0.061018	-0.296972	-0.453636	-0.383724	0.237425	0.376706	0.221312	-0.920639	-0.26053	0.100666	0.418805	0.019537	-0.293056	-0.261917	-0.164875	-0.375127	-0.257864	0.316011	0.397804	-0.573756	-0.496976	-0.009777	-0.169305	0.446074	0.589507	0.322931	0.539301	0.176731	0.285972	-0.188967	0.456235	0.049951	-0.873621	-0.3227	0.552064	0.793841	0.467299	0.435821	-0.808523	-0.353884
frg_129	0.501884	0.616098	0.507313	-0.090101	0.004423	0.585711	-1.10937	-0.229253	-0.276479	-0.488413	0.761451	0.150833	0.022532	0.096112	0.137679	-0.415815	-1.02287	-1.27867	-0.115953	0.182312	-0.659813	-0.80014	-0.388442	0.098211	0.127437	0.070583	-0.525955	-1.29355	-0.029681	0.493623	0.581826	0.076783	0.015158	-0.080716	-0.040388	0.205152	-0.272798	0.233851	0.093926	-0.554427	0.728661	0.519638	-0.240563	-0.16127	0.070856	0.235141	-0.064191	-0.333275	-0.036862
frg_134	-0.005096	1.22506	0.202774	-0.521042	-0.118549	-0.176307	-0.725814	-0.820815	-0.79603	0.503213	-0.356339	-0.013525	0.504859	-0.28843	-0.423269	0.445694	0.89825	-0.181524	-0.112596	-0.520608	-0.115545	-0.020457	-0.228717	-0.001382	-0.334801	0.285768	0.594441	-0.681067	-0.834977	0.304981	0.439976	-0.825984	0.975148	-0.113289	-0.41576	-0.471204	-0.956609	-0.005543	0.340056	0.249333	-0.185698	1.00921	-0.84764	-0.253069	-0.551625	-0.312558	0.284688	-0.666807	0.938354
frg_705	0.802226	1.19705	-0.208621	0.21842	-0.068054	0.189431	0.388328	0.622289	0.223323	-0.1439	-0.096999	-0.408206	0.043595	0.545959	0.192247	-0.244689	0.322252	-0.222104	0.421824	-0.178909	0.11653	0.490109	0.384783	0.302945	-0.144808	-0.118683	-0.318428	0.960031	-0.148258	-0.606088	-0.13538	0.018897	0.434627	-0.236944	0.402049	0.152148	0.011575	-0.057638	0.296639	-0.305783	-0.041814	-0.407551	-0.195474	0.436803	0.592623	0.193256	0.093589	-0.330737	-0.154319
frg_464	0.17149	0.77772	0.299628	-0.057303	-0.050622	-0.457984	-0.167515	-0.508098	0.087129	0.397725	0.255037	-0.497068	0.035695	0.184631	0.030997	0.305625	-0.582987	-0.309972	0.030434	-0.39616	0.253325	0.056765	0.112846	-0.923584	-0.557543	-0.218122	0.819058	-0.06562	-0.395634	0.083248	0.124852	0.272613	0.410094	0.649961	-0.266373	0.462849	-0.428874	0.343212	-0.140225	-0.097049	0.284893	-0.126791	0.109422	-0.11191	-0.003277	0.501044	0.265905	-0.186833	0.139642
frg_786	0.057586	0.480525	-0.463076	-0.056554	-0.026538	0.511078	-0.802172	0.236043	-0.307272	0.024741	-0.457338	-0.253329	-0.491949	-0.379977	-0.028401	-0.645294	0.098489	-0.871865	0.375254	-0.528994	-0.470682	0.107699	-0.016695	-0.374103	-0.202656	0.260506	-0.395098	0.432989	-0.587425	-0.534383	0.453954	-0.524981	-0.250225	-1.01278	-0.530948	-0.734477	-0.313844	0.286283	-0.070293	-0.033391	0.069018	-0.035427	0.005144	0.09331	0.036219	0.33659	-0.137558	0.724123	0.321602
frg_157	0.351612	-0.116966	0.322456	-0.539724	-0.454773	-0.119845	-0.55685	0.274139	0.525391	-0.041427	-0.3641	0.029302	0.369848	0.093299	-0.134993	0.38651	0.00244	-0.096132	0.089528	-0.002094	-0.406179	0.387972	0.735687	0.169817	0.032258	0.231251	-0.014161	-0.041881	0.305599	0.360384	0.315933	0.190078	0.097777	-0.676857	0.020234	-0.990442	-0.267735	0.275382	-0.29887	-0.041977	-0.473156	0.502758	0.070617	0.195491	-0.308574	-0.242582	0.053042	-0.508708	0.092665
frg_355	-0.319537	0.3973	-0.795528	-0.2935	-0.14445	0.074529	-0.431797	0.020977	-0.194564	0.07922	0.104732	-0.270024	-0.193076	0.841688	-0.315802	0.143185	-0.112163	0.74799	-0.712306	0.022473	0.40188	-0.486057	0.576768	-0.106507	0.207932	-0.297712	-0.479673	0.380888	-0.544801	-0.240605	0.166603	0.453358	0.213523	-0.120804	-0.095104	-0.167145	-0.961624	0.006932	-0.950832	-0.390213	-0.138563	0.434095	0.59986	0.046198	0.034802	-0.591625	0.369125	0.403084	0.105918
frg_334	-0.44654	1.17944	-0.129222	-0.400947	-0.308172	0.066927	-0.784893	-0.327254	-0.897603	0.693633	-0.454923	-0.122947	0.591512	0.101521	-0.308687	0.217118	0.63922	-0.205339	-0.198622	-0.51895	-0.240953	-0.074409	-0.059305	-0.283666	-0.346772	-0.35602	0.597275	-0.558449	-0.494054	-0.20794	0.079883	-0.44355	0.855529	-0.339037	-0.486834	-0.432431	-0.70665	-0.127622	0.346777	0.035068	-0.067536	0.798874	-0.515839	-0.352627	-0.462479	-0.464959	0.774363	-0.635994	0.677839
frg_396	0.751885	0.965774	0.036535	-0.889318	-0.260847	-0.0179	-0.044583	-0.616352	-0.787591	-0.102657	0.317297	-0.687773	-0.163655	0.544258	0.386874	-0.919041	0.115907	-0.132646	-0.245042	-0.0026	0.349672	0.365702	-0.827151	-0.450473	-0.065387	-0.051257	0.075798	-0.758362	-0.306591	0.486104	0.441469	0.03789	-0.012073	0.397755	-0.320855	0.302612	-0.591983	-0.538395	0.10584	-0.062187	0.217532	0.189216	-0.896325	-0.142111	-0.549156	-0.011718	0.361839	-0.810106	0.199369
frg_270	0.726437	0.488724	-0.750291	-0.628299	0.485858	-0.754053	-0.277774	-0.023636	0.428391	0.379565	-0.423751	0.530528	0.313123	-0.259215	1.0585	-0.852263	0.159059	0.192438	-0.259165	0.120199	-0.7003	0.154693	2.6e-05	-0.357673	-0.46645	0.38383	-0.63638	0.55232	-0.574546	0.439328	0.309912	-0.058628	-0.158297	-0.444508	-0.339732	-0.18029	-0.489414	-0.534592	-0.450444	-0.538833	0.719277	-0.397237	-0.564173	0.651907	0.336807	-0.237154	-0.251147	0.230723	0.805299
frg_380	0.028292	0.760753	-0.466528	-0.352974	-0.697954	-0.152976	-0.090908	-0.218757	0.60282	0.119217	0.041609	0.200637	0.0775	0.081193	0.545314	-0.037968	-0.221786	0.088584	-0.389724	-0.3362	-0.119327	-0.547929	0.13036	-0.682709	-0.292866	-0.032763	0.092071	0.409129	0.156795	0.420812	-0.596011	-0.424504	0.701465	-0.65465	-0.514665	-0.200445	-1.075	-0.622683	-0.32687	-0.124511	0.191225	0.185283	-0.67271	0.371714	-0.158634	-0.313165	-0.138837	-0.271972	0.226496
frg_453	0.478623	0.871118	0.725586	-0.288747	0.169461	0.244595	-0.372993	0.169836	-0.888101	0.309816	-0.506567	-0.642961	-0.932569	-0.57546	0.297753	-0.56754	-0.757271	0.021261	0.428203	0.004751	0.065344	0.099526	-0.692283	-1.20923	-0.329746	0.627549	0.269875	0.173625	-0.384059	0.612619	1.07314	0.509944	-0.311004	-0.943011	-0.152659	-0.302181	0.014928	0.265744	1.05293	-0.444707	-0.431088	-0.593329	-0.354737	0.520161	-0.115809	-0.017312	-0.435262	0.054431	-0.131868
frg_397	0.775209	-0.011365	-0.722513	0.052979	-0.172099	-0.484955	0.647655	-0.41426	-0.662558	-0.006876	0.151901	-1.16846	-0.178936	0.738133	0.791149	-0.126434	-0.609837	0.257656	-0.948064	0.242754	0.568377	-0.166821	0.288489	-0.245684	0.185856	0.061011	0.026286	-0.305857	-0.602784	0.778781	0.412997	0.40672	-0.615019	-0.101808	-0.497582	0.436473	-0.100485	-0.260342	0.389356	0.040357	0.057736	-0.271486	-0.557926	-0.121985	-0.595384	0.72378	0.146435	-0.188421	-0.362899
frg_198	1.02172	0.09376	0.254391	-0.709914	0.558467	-0.096079	-1.05153	0.14964	0.424458	-0.435376	0.09875	-0.155726	-0.178156	0.015528	-0.021992	-0.152697	-0.306683	0.247409	0.123901	-0.25797	-0.215352	-0.459223	0.006384	-0.480303	-0.095993	-0.157902	0.304997	0.007332	0.062022	0.267628	0.65665	0.191915	0.095923	0.071689	0.621868	-0.641897	0.170974	-0.490697	0.189875	-0.94021	-0.162706	0.121476	-0.464184	0.081702	0.372304	0.011155	-0.12098	0.095405	0.206012
frg_733	0.337703	1.11476	-0.306543	-0.288446	0.368397	0.104597	-0.368316	0.014792	-0.543759	0.192176	-0.313823	-0.257459	-0.788735	0.310709	0.366275	0.209107	0.138047	0.009461	-0.446353	-0.081375	0.465659	-0.344285	0.225846	-1.20298	-0.490082	0.079665	-1.04991	-0.369164	-0.229768	-0.395288	0.407308	-0.156487	0.660664	-1.42971	-0.633331	-0.331554	-0.67529	0.106941	-0.179943	-0.338601	0.104348	-0.107682	-0.302499	-0.24398	-0.217798	-0.348663	-0.556021	0.297126	-0.68117
frg_297	0.306456	0.823058	-0.220546	0.641323	0.175699	-0.219857	-0.228445	-0.817168	-0.817613	0.613338	-0.335038	-0.261897	0.106904	0.441366	0.463468	0.060218	-0.253375	0.26709	0.003365	0.010977	-0.400775	-0.198837	-0.144327	-0.260874	-0.26969	-0.28783	0.621521	-0.047402	-0.487709	-0.47228	-0.50463	-0.276803	0.506197	0.381385	0.32074	0.655016	0.607461	-0.067606	0.236297	0.131875	0.216302	-0.774653	-0.691945	0.527103	0.84993	0.995916	0.665373	-0.976154	-0.24289
frg_791	0.242617	0.146438	-0.050386	-0.108728	0.08369	0.420191	-0.114799	-0.00553	-0.520596	-0.252245	-0.160829	0.346676	-0.491967	-0.948531	-0.773059	-0.052395	-0.008208	0.474984	-0.344481	-0.103559	0.182033	0.140415	-0.18464	-0.530929	-0.513871	-0.000679	0.697004	0.112981	-0.489437	0.573701	0.648871	0.370771	0.075052	-0.984603	-0.334604	-0.164655	-0.787055	0.008148	-0.579438	-0.047767	-0.031251	0.003234	0.303778	0.149918	0.096752	0.099329	-0.105107	0.732785	-0.305286
frg_496	-0.053435	0.148201	0.363445	-0.047697	1.0787	-0.261094	-0.610098	0.455981	0.511592	-0.25469	-0.258283	0.028335	0.83817	-0.120575	0.392714	-1.16577	-0.58373	-0.753018	-0.292071	-0.955392	-0.809692	-0.631888	1.13363	-0.367392	0.315901	0.510229	-0.603858	0.328244	-0.3922	-0.03785	0.561098	-0.138554	0.570516	-1.47268	0.782382	-0.599128	-0.34028	0.286561	-0.603668	0.018706	-0.322127	-0.073194	-0.401152	-0.183699	1.04963	-1.00754	-0.318763	0.647277	0.144237
frg_437	0.611461	1.03469	-0.059727	-0.471845	0.264408	0.162675	0.449999	0.264715	-0.373628	0.395223	-0.288704	-0.62915	-0.774727	0.607683	-0.343133	-0.586806	0.251574	0.245166	-0.389958	0.178578	0.380629	0.166625	-0.046904	0.176429	0.45611	0.443239	-0.455657	0.007068	-0.060213	-0.340078	-0.208468	0.0864	0.091598	-0.621127	-0.356067	0.711016	-0.982123	0.082342	1.00105	-0.534118	0.55862	0.014062	-0.88075	0.040272	0.111443	0.154866	0.488033	-0.945557	-0.029224
frg_475	0.403413	0.265562	-0.618414	0.094519	-0.242624	-0.013643	0.259591	-0.116248	-0.465492	-0.029472	0.218804	0.124353	-0.217094	0.336792	0.641234	0.744401	-0.388508	0.553812	-1.49991	0.227762	-0.060991	0.064553	0.218651	-1.0059	-0.188973	-0.560101	-0.519012	0.356032	-0.318806	0.237404	-0.04401	1.09815	-0.212446	-0.219246	-0.254023	-0.483406	-0.023374	0.324009	-0.297837	-0.041804	-0.082519	-0.364257	0.261122	0.563186	0.015902	-0.014735	0.392918	0.089507	-0.359655
frg_850	-0.064094	0.472123	0.96011	0.327319	0.372532	-0.11591	-0.418336	0.837903	0.047885	0.58793	-0.168599	-0.585397	0.30079	0.00118	0.402101	-0.996742	-0.722568	-1.60702	-0.119718	0.179128	-0.748354	-0.258702	0.04096	-0.354794	0.292232	0.156391	-0.716468	-0.935823	-0.416447	-0.389978	0.960396	0.313831	-0.221417	-1.33363	0.147059	-0.534766	0.017994	0.639982	0.544238	-0.077866	-0.280018	-0.368806	-0.693564	-0.387796	0.643466	-0.591262	0.123379	0.811839	0.002429
frg_153	0.288035	-0.220897	-0.050906	-0.406519	0.055032	-0.294439	-0.057641	-0.188902	-0.367077	0.171178	-0.013028	-0.49087	0.463198	-0.230917	0.534576	-0.146979	-0.492334	0.481642	-0.590834	0.189145	0.028759	0.094462	0.612868	-0.728318	0.117642	-0.128949	-0.018598	0.014541	-0.406026	0.87748	-0.03484	0.187504	-0.380151	-0.431201	-0.272767	-0.317253	0.407259	0.619393	-0.418146	-0.064918	-0.292383	0.064222	-0.622194	0.361651	0.266908	-0.049467	0.014452	-0.199784	-0.292827
frg_493	0.210054	-0.130091	0.077213	-0.012683	-0.429076	-0.001931	-0.826443	-0.299275	-0.54085	0.786663	-0.730494	0.345238	0.32129	-0.710699	1.23102	-0.480379	0.122742	-0.837991	-0.545571	-0.050109	0.423419	-0.825133	-1.22743	-0.565385	0.797738	-0.054161	-0.426151	-0.540516	-0.040576	0.188108	0.247968	0.231678	0.303059	-0.783749	-0.552056	0.008213	-0.865192	-0.984128	-0.562505	-0.461596	-0.338006	-0.106436	-0.149302	0.677944	0.387781	0.075802	0.061835	0.002873	-0.07866
frg_383	0.314555	-0.305338	0.37291	0.376927	-0.265374	-0.611885	0.001552	-0.679315	-0.398933	-0.42708	0.521098	-0.502421	0.584543	-0.267943	-0.050616	-0.373883	0.271677	-1.39422	-0.944702	-0.115955	-0.707704	-0.09691	-0.098077	-0.405726	0.356476	-0.260586	0.219705	-0.33914	0.3102	1.44715	0.617515	0.075903	0.511009	-0.217063	-0.345931	0.12759	-1.07113	-0.160304	-0.19008	0.314919	-0.068261	0.395097	0.468086	0.730329	0.12402	0.036255	-0.278196	-0.1198	0.169796
frg_392	0.695007	-0.170684	0.732716	0.669411	0.249713	0.009728	-0.202457	0.365826	0.115264	-0.195708	0.133227	-0.062859	0.152825	0.157134	0.778095	-0.598025	-0.289542	-1.03254	-0.169625	0.786252	-0.003713	0.146652	-0.141019	-0.322589	0.197165	-0.041614	-0.106264	-0.335331	-1.20352	0.320883	0.000694	0.005817	-0.140422	0.347805	0.219535	0.401059	-0.422854	0.716548	0.179828	-0.088609	-0.171874	-0.282384	-0.165471	0.409363	0.124467	0.028916	-0.053801	0.508546	0.519146
frg_239	0.515938	0.264094	0.301953	-0.648103	-0.690714	-0.400249	-0.378245	-0.210949	-0.162601	0.111009	-0.605138	0.622491	0.578433	0.017287	0.038707	-0.083656	0.580486	0.034434	-0.094631	-0.200823	-0.124603	-0.046799	0.500577	-0.227677	0.115676	-0.227698	0.228079	0.017314	0.563918	0.290748	-0.128647	0.136142	-0.080275	-0.484007	-0.29463	-1.13272	-0.430283	-0.103122	-0.031347	-0.142614	-0.517599	-0.240657	-0.013982	0.248036	-0.49426	0.342247	-0.014679	-0.714891	-0.093263
frg_378	-0.319174	-0.006198	-0.941114	-0.499298	0.068822	0.949982	-0.036792	0.379737	-0.394602	0.230933	0.316294	-1.11168	-0.764242	1.80045	-0.383613	-0.031438	-0.584431	-0.546705	-0.356718	-0.510183	0.196025	-0.295495	0.983179	-0.127368	0.662699	-0.088672	-1.06456	0.031171	0.263537	6.8e-05	0.636454	0.295182	-0.023144	-0.209911	-0.095066	0.104751	-0.734702	-0.014313	-0.230647	-0.350977	0.148777	-0.362313	0.086585	-0.066059	-0.624039	0.530504	0.513907	-0.19765	-0.51584
frg_418	0.386144	0.294721	-0.352496	-0.465595	0.485452	-0.443972	-0.39033	0.234541	-0.083505	0.016081	-0.224227	-0.496713	0.243013	0.373575	-0.088887	-0.237876	-0.067897	0.378121	-0.29941	-0.047389	0.215038	0.269558	0.385364	-0.50659	0.300155	-0.29557	0.155526	0.252318	-0.072328	-0.48329	-0.151313	-0.800607	0.425893	-0.133805	-1.06667	-0.681244	-0.616523	0.114227	0.236071	-0.140857	-0.473601	0.138228	0.021882	-0.687434	0.050279	-0.712493	-0.214511	-0.46574	-0.488132
frg_332	0.570131	0.463529	0.663489	-0.313817	-0.179549	-0.393358	0.30917	-0.417028	-0.302918	0.037087	-0.178801	-0.313947	0.242518	0.458821	0.037034	-1.02102	-0.123117	-0.531201	-0.15478	-0.015207	0.113412	0.030736	0.398875	-0.510195	0.037662	0.342073	0.582798	-0.543014	0.05474	0.93352	0.7509	0.243622	-0.451189	-0.780934	-0.24092	-0.061883	-0.502888	-0.221744	0.553031	0.113912	0.279921	0.265464	-0.475177	-0.419045	-0.38994	0.655473	0.158859	-0.785109	-0.367422
frg_890	0.767636	0.41034	1.1477	-0.267034	-0.098605	0.279238	-0.4237	0.47492	-0.727275	-0.246754	-1.18712	-0.746046	0.733007	-0.883418	0.461861	-0.378597	-1.45799	-1.53644	0.182748	-0.520437	-1.13605	-0.603295	-0.91731	-0.311745	0.627722	-0.575676	-0.311468	0.949894	0.077271	-0.059699	0.679916	-0.093881	-0.378603	-1.19217	0.645343	0.596505	-1.04687	0.77998	0.414684	-1.21845	-0.643686	-0.256845	0.011269	0.098097	0.753514	0.220566	-0.94165	0.185837	-0.279216
frg_348	0.380066	0.842948	-0.46746	0.263303	-0.087547	-0.163285	0.008305	0.77849	0.11045	-0.241246	-0.702593	-0.741559	-0.633941	-0.353016	0.268287	-0.488389	0.014272	0.524422	0.206648	-0.732787	-0.110666	-0.330881	0.038296	0.242393	-0.16073	0.821414	-0.432198	0.387749	-0.311662	-0.436391	0.863087	-0.076262	0.254074	-1.3067	0.025853	-0.336728	-0.68752	0.143846	0.709139	-0.303764	0.110423	-0.206136	0.087438	0.351472	0.348085	0.023696	-0.606036	-0.208728	0.231893
frg_182	0.596745	0.448234	0.07044	0.014144	-0.073175	0.326661	-0.449467	-0.707471	0.050102	-0.082444	0.092015	-0.122841	0.151782	0.993354	0.393061	-0.339196	-0.735219	-0.484967	-0.512586	-0.143049	-0.679982	0.02533	-0.641973	-0.402905	-0.160952	-0.127751	0.476399	-0.671021	-0.713537	0.249242	0.394297	0.290349	0.202027	0.107006	-0.328714	0.428914	-0.708376	0.603984	0.055271	0.066808	-0.153765	0.057569	0.319315	-0.004672	-0.504345	0.260504	-0.22874	-0.646693	0.328844
frg_310	-0.29585	0.088947	-0.066675	-0.26269	0.717768	0.144676	0.182404	-0.124549	0.430459	0.144626	0.421228	-1.45343	0.0004	0.588443	-0.333013	0.789864	-0.798592	-0.00577	-0.295691	-0.90511	-0.711857	0.161034	-0.345536	0.20572	0.393186	-0.49524	0.568803	0.36196	0.006969	0.209088	-0.385911	0.484822	0.586996	-0.076926	-0.094448	0.270097	-0.245503	0.979447	0.359627	-0.03531	0.222939	0.567021	0.292096	-0.257017	-0.623884	0.421551	0.654759	-0.742441	0.266821
frg_229	-0.1347	0.45285	0.284089	-0.369483	0.196382	-0.22082	-0.144396	0.000972	-0.016535	-0.290792	-0.284908	0.124478	-0.559738	-0.81756	-0.17747	-0.698976	0.327032	0.03559	0.087758	-0.087459	-0.816234	-0.39454	0.193939	-0.868251	-0.326338	0.932711	0.327887	0.699413	-0.401062	0.679113	0.641026	0.217601	-0.10456	-1.303	-0.188342	-0.487566	-0.289955	0.075739	0.024814	-0.112497	0.039837	0.025171	-0.031141	0.390386	0.008887	0.149857	-0.733743	0.457897	0.042032
frg_336	0.555878	0.308477	-0.677892	-0.060635	0.000188	-0.925093	-0.067197	0.270902	-0.221046	0.309547	-0.557281	0.348696	0.418894	-0.127594	0.164275	-0.265745	0.632156	0.236277	-0.531977	0.287186	-0.779691	0.106836	0.111492	-0.574249	-0.620549	-0.187272	0.032844	0.29163	-0.371517	0.609019	0.288736	-0.020843	0.10745	-0.331275	-0.787331	-0.073787	-0.618595	-0.737404	-0.493354	0.079088	0.178441	0.18323	-0.13673	0.352376	0.065837	-0.349506	0.121409	0.082605	0.906197
frg_161	0.789824	-0.327124	0.28345	0.055753	0.231719	-0.207441	-1.0266	-0.117288	0.182527	-0.13945	-0.375527	0.156208	1.04122	-0.704014	0.583742	-0.050789	-0.457975	-0.573787	-0.191397	0.701974	-0.563296	-0.369588	-0.245891	-0.298636	0.191195	-0.267984	0.096722	0.192114	-0.495666	0.789656	-0.057578	-0.363871	0.089059	-0.194023	0.29832	-0.302652	-0.79116	0.475813	-0.145758	-0.086836	-0.266361	0.235203	-0.160519	0.074235	-0.15804	-0.408369	-0.472513	-0.348451	0.062529
frg_479	0.765404	-0.196956	1.3759	-0.151955	-0.035564	0.996083	-1.17932	-0.311851	0.28444	-0.578803	0.079598	0.753019	0.468984	-0.349673	0.312577	-0.447416	-1.17421	-0.625242	-0.416905	0.235483	-0.65786	-1.02319	0.114678	-0.062443	0.521046	0.451377	-0.760271	-1.0229	0.132351	0.764621	0.551472	0.009821	-0.833892	-0.344244	0.294722	-0.986834	-0.309754	-0.024875	-0.284181	-0.167269	0.52562	0.818362	-0.305442	0.169935	0.808435	-0.003017	-0.176736	0.372409	0.010422
frg_897	-0.080603	0.226126	1.46811	-0.427208	-0.877339	0.218076	-0.293533	-1.29096	0.195876	-0.29809	-0.247582	0.590934	0.516182	-0.633878	-0.418763	-0.380304	-0.471495	-0.374829	0.594271	0.495532	-0.105105	0.025484	0.905153	-0.690923	-0.554255	-0.18565	0.735038	-0.272634	-0.784681	0.710461	0.602677	0.566605	-0.098816	0.056524	0.093498	-0.902693	-0.356633	-0.190818	-0.673365	0.503411	-0.368826	0.53392	-0.219115	0.015417	-0.378918	-0.000982	-0.736869	-0.595628	0.196197
frg_743	0.87795	0.678377	0.022118	-0.354834	0.199839	-0.451769	-0.448282	0.276046	0.434633	0.323658	-0.317076	0.406748	-0.264602	-0.587643	0.3975	-0.698829	0.336256	-0.509212	-0.152621	0.510399	-1.16145	-0.219731	-0.218696	-0.001239	-0.527222	0.077717	-0.258623	0.684174	-0.808066	0.113107	0.523069	0.063502	-0.311204	-0.474924	-0.326252	-0.373486	-0.032071	-0.528775	-0.13373	-0.78511	0.349614	-0.003899	-0.820397	0.006446	0.262431	-0.553666	-0.509894	0.613411	0.940067
frg_369	0.437729	0.448497	0.094008	-0.065052	-0.767767	0.029986	-0.150209	0.19011	0.676025	-0.200758	-0.037972	0.098676	0.004307	-0.165817	-0.049199	0.129317	0.28221	0.027179	-0.769221	-0.370134	-0.332449	-0.270833	0.516655	0.071931	0.167545	0.157965	-0.297763	0.032678	0.035087	0.630855	-0.369729	-0.318787	0.788157	-0.373936	-0.302881	-0.152981	-0.618936	-0.068167	-0.208063	-0.182863	0.385823	0.687813	-0.504587	0.415703	-0.359258	-0.064392	-0.065364	-0.00181	0.19751
frg_401	0.606019	0.884837	0.122454	-0.502545	0.220187	0.735964	-0.083929	-0.155881	0.042142	0.210994	-0.441415	-0.058173	-0.412145	-0.419731	-0.516008	0.375513	-0.090444	-0.017793	-0.111265	-0.387937	-0.459799	0.21655	-0.467001	-0.052884	-0.276003	0.33223	-0.229549	0.556863	-0.44121	0.239553	-0.324746	-0.466469	-0.293594	-1.15994	-0.628803	-0.882273	-0.522205	0.546611	-0.005347	-0.020867	-0.286336	-0.014463	0.426982	0.371653	-0.667001	0.489315	-0.247529	0.317546	-0.530373
frg_252	0.039033	0.137164	0.245214	-0.53869	-0.07416	-0.272217	0.09027	0.484285	-0.060535	-0.325917	-0.13609	-0.499014	0.143342	0.696169	-0.313402	-0.168783	-0.478176	-0.177165	-0.236803	-0.411006	0.234047	0.068382	0.441214	0.025133	0.257222	0.136462	0.372031	0.559889	-0.087482	-0.276612	-0.074825	-0.62239	0.940366	-0.1389	0.057354	-0.429085	-0.364115	0.1927	0.062463	-0.049246	-0.108219	-0.10916	-0.095724	-0.041789	-0.149549	0.06306	-0.612779	-0.91059	0.051124
frg_575	1.23221	0.384441	-0.042555	0.406126	-0.356965	-0.437676	-0.335701	0.049588	0.166931	-0.124568	-0.994875	-0.479521	0.018025	-0.524411	-0.105616	0.550226	-0.543079	-0.652328	-0.516044	0.17171	-0.263475	0.459366	-0.525528	-1.02439	0.529126	-0.569504	-0.713899	1.03527	-1.2002	0.577402	0.837721	0.177234	0.463836	-0.582118	-0.400391	0.279762	-1.21473	0.280221	0.950312	-0.520139	-0.610898	0.599129	0.112075	-0.551432	0.236488	-0.5068	-0.649432	0.136335	-0.959451
frg_742	0.644794	-0.318944	0.435367	0.119979	-0.686901	0.404715	-0.590671	0.236289	-0.097083	0.312115	-1.14274	0.766401	0.122303	-0.404296	0.199135	-0.41144	-0.057912	-0.216286	-0.811652	-0.611247	-0.775595	-0.619738	-0.093225	-0.040899	0.413578	-0.272379	-0.951719	-0.49138	0.766952	0.81224	0.361896	-0.235641	-0.124309	-0.074989	0.396326	-0.004237	-1.55252	-1.16622	-0.220645	0.657449	-0.792431	-0.375699	0.121912	0.619606	1.25515	-0.217134	0.387034	1.02542	0.02939
frg_752	0.085308	-0.091988	-0.035773	0.009061	0.322949	0.348437	-0.313421	-0.146794	0.498674	-0.115809	-0.202565	-0.403479	-0.372315	0.646096	0.606327	0.102931	-0.28312	-0.67759	-0.454159	-0.124402	-0.583171	-0.372361	-0.485064	0.222772	-0.178965	-0.901692	-0.366141	0.284482	0.381943	-0.233391	-0.410766	-0.245107	0.836666	0.293427	0.040364	0.308725	-0.571241	-0.092668	0.109374	-0.316971	0.061843	-0.429183	0.12251	-0.130682	0.388443	0.291176	0.84366	-0.287045	-0.355611
frg_499	-0.142195	0.12848	0.770123	-0.467349	0.004349	-0.906598	-0.522033	-0.928495	0.403012	-0.199646	0.157172	-0.27124	0.484212	-0.216486	0.373463	-0.407923	-0.323021	-0.037919	-0.053224	-0.13659	-0.613114	-0.17043	1.09382	-0.761339	0.04574	0.24726	1.09686	-0.509645	-0.651059	1.21866	0.56735	0.364679	0.333053	0.203098	0.359324	-0.809728	-0.081405	0.382624	-0.307829	0.098385	-0.091524	0.616932	-0.325853	-0.250778	-0.214188	-0.377724	-0.526266	-0.212018	0.386582
frg_318	-0.080358	0.066277	-0.180337	-0.429764	0.00317	0.377444	-0.634282	-0.367132	-0.293984	-0.149393	-0.444547	-0.141704	-0.638058	-0.619208	0.169427	-0.713447	0.320657	-0.080032	-0.039208	-0.019651	0.457571	-0.488168	-0.093443	-0.173481	-0.312826	0.819322	0.080013	0.287202	-0.467505	-0.278828	-0.389704	-0.493154	-0.575428	-0.788342	-0.33086	-0.322546	-0.601038	0.045677	0.273157	-0.279108	-0.128385	-0.519185	0.182761	0.398297	0.370462	0.572322	-0.302001	0.455822	0.049968
frg_520	0.694251	0.325336	0.503429	-0.497583	0.147148	-0.021647	-0.422315	0.754955	-0.796797	0.342088	-0.518406	-0.323517	-0.4908	-0.945336	0.402556	-0.566797	-0.468529	-0.153599	0.257522	-0.13747	-0.078896	-0.175285	-0.49656	-0.620575	-0.135182	0.680937	0.221208	0.097021	-0.413266	0.470937	0.98874	0.222455	-0.468218	-0.81624	-0.372	-0.965844	0.487416	0.395418	0.786748	-0.121918	-0.561108	-0.408258	-0.476339	0.481984	-0.326234	0.204353	-0.737035	-0.023798	-0.14832
frg_480	0.709748	-0.127025	1.18163	0.214406	-0.150649	0.698782	0.0375	-0.18125	-0.562759	0.066556	0.55097	0.287685	-0.283129	0.442366	0.349836	-0.920925	-0.838588	-1.15307	-0.090745	0.325799	-0.724847	-0.852981	-0.185052	0.466505	0.807683	0.310958	-0.619242	-0.736564	0.132311	0.492051	0.5587	0.763064	0.005764	-1.01672	0.286408	0.480814	0.213418	0.499195	0.175485	-0.576821	0.823772	-0.421295	0.342342	0.248706	0.893449	0.398342	0.197044	0.519377	-0.145004
frg_386	0.335392	0.817653	-0.267657	-0.608242	0.175035	0.149406	0.196281	0.359621	-0.610827	0.039899	-0.541144	-0.694498	0.134185	1.05625	0.119448	-0.322051	0.383433	-0.549316	-0.387796	-0.056609	0.372322	0.473636	0.235462	-0.396484	-0.143841	-0.191045	-0.153982	0.528628	-0.238972	-0.496362	0.121485	0.110816	0.01291	0.013687	0.225504	-0.347548	-0.049188	0.310436	0.111758	-0.127425	-0.212085	-0.762714	-0.378209	0.114987	0.409225	0.54577	0.483557	-0.637164	0.152137
frg_1243	-0.101185	-0.015053	0.142066	-0.089754	-0.241187	0.12825	-0.73603	0.875126	-0.0306	0.446961	-0.43417	0.07741	-0.513024	0.066344	0.424538	-0.181527	-0.172493	-0.360413	0.442539	-0.405187	-0.387318	0.316261	0.423152	-0.39427	-0.057238	0.35276	-0.877157	0.260433	-0.031673	-0.121142	0.569232	-0.293018	0.013784	-1.34455	-0.503852	-0.57027	-0.482265	0.89981	0.161511	-0.076323	0.293438	-0.032782	0.374023	0.077826	-0.259589	-0.807801	-0.523584	0.405638	-0.192084
frg_593	0.26509	0.147352	1.53028	-0.411749	0.088487	-0.15339	-0.437074	-0.31298	0.567632	0.53274	-0.701195	1.4785	0.134253	-1.14019	1.01991	-1.43029	0.344676	-2.23763	-0.443474	-0.56344	-0.704306	-0.954789	-0.153217	0.059814	0.39226	-0.250881	-1.87432	-0.543758	0.17213	0.70697	0.307898	-0.058706	-0.057339	-0.586189	0.740919	-0.766069	-0.637034	-0.189964	-1.17478	-0.215718	-0.553182	-0.660023	-0.185932	0.913236	-0.046291	-0.604892	-0.833274	-0.723231	-0.02391
frg_521	0.437574	1.01944	0.509057	-0.25003	0.123802	0.08506	-0.61116	0.422862	-0.956902	0.290662	-0.424768	-0.673913	-0.841781	-0.90922	0.694699	-0.76083	-0.632559	0.128262	0.311538	0.196977	0.063691	-0.380334	-0.579683	-1.13647	-0.31312	0.967118	0.346506	0.326981	-0.121753	0.657368	1.19967	0.341098	-0.15037	-1.06732	0.021525	-0.180335	-0.019363	0.281326	0.807835	-0.083696	-0.355936	-0.560482	-0.597381	0.501468	-0.263142	-0.062782	-0.545095	0.408072	-0.279102
frg_267	0.170615	0.421281	0.115962	-0.271817	-0.501222	-0.456068	-0.150817	-0.695033	0.289809	0.275527	-0.17715	0.355321	1.30345	0.060228	0.194182	-0.47757	0.304948	-0.228974	-0.186681	-0.547129	-0.170779	-0.705993	0.120937	-0.522941	-0.045377	-0.245828	0.235735	0.004586	-0.37314	0.218917	-0.336625	-0.152165	0.260234	-0.532903	-0.074809	-0.220542	-0.791792	-0.501173	-0.412988	0.058743	0.145581	0.216805	-0.203269	0.296334	0.522617	0.144695	-0.254644	-0.423665	-0.310068
frg_1142	0.528647	-0.19751	0.784745	-0.506162	-0.235393	0.246538	-0.928519	0.356705	-0.119343	-0.262386	0.021858	0.288134	0.802744	-0.573162	-1.12212	-0.20499	0.46896	-1.5425	-0.664052	0.47281	-0.286276	0.095435	-0.296398	-0.002313	0.843656	-0.390908	-0.683671	-0.689959	0.084932	0.675894	0.358231	-0.499646	0.712579	-0.3505	-0.276387	-1.35847	0.226868	0.2609	-0.782704	0.0537	-0.442592	0.385854	0.174972	0.036303	0.09529	-0.199786	0.135186	-0.13382	0.546165
frg_576	0.240157	1.00483	0.304004	-0.142523	0.05025	0.591914	-0.478656	0.392221	-0.372522	0.42098	1.00697	0.05172	0.32454	-0.095179	-0.698028	-0.314484	-0.364858	-0.989552	-0.514324	-0.734742	-0.663813	0.073942	-0.44407	-0.020119	0.529865	-0.588189	-0.716448	-0.121737	0.434758	0.667532	0.176674	-0.527773	0.838016	-0.53758	0.567138	0.121061	-0.347295	-0.051761	-0.416861	0.05698	0.386126	0.257886	-0.563628	0.672032	0.150591	0.023004	0.018877	0.357461	0.341069
frg_469	0.385099	0.700323	-0.687977	-0.668009	-0.373952	0.711532	-0.003777	-0.171305	0.25577	-0.425664	-0.065526	-0.092928	0.451253	0.396858	-0.044621	0.321862	-0.64456	0.719493	-1.02741	-0.188277	0.966369	-0.176306	-0.678431	0.11742	1.17359	0.198396	-0.956379	0.575396	-0.333056	0.813646	0.064037	0.309693	0.327606	0.092424	0.379757	0.064135	-0.647821	-0.256278	-1.02044	0.15949	-0.380306	0.019609	0.287522	0.669171	0.194145	-0.272282	0.362433	0.498295	-0.15298
frg_483	0.190444	0.612011	-0.463909	-0.66113	0.131366	0.284399	0.265262	0.354803	-0.142909	-0.434883	-0.360284	-0.409082	0.016543	-0.577528	-0.164326	-0.351629	0.186348	0.172293	-0.174703	-0.104682	0.361525	-0.2214	0.141151	-0.43075	-0.329668	0.091708	0.176374	0.649422	-0.486214	0.548542	0.702052	0.044751	-0.066856	-0.733376	-0.440915	-0.5252	0.128363	0.475602	-0.663334	0.082303	-0.656524	0.191902	0.01585	0.503525	-0.072147	0.637857	-0.725457	0.086583	-0.628363
frg_1220	0.256066	1.25861	0.82489	-0.426896	-0.288956	0.535094	-0.347236	-0.309064	-0.669589	0.435578	-0.639357	-0.497142	-0.844183	-0.429047	0.291066	-0.280311	-0.74617	0.125921	0.506375	-0.175878	-0.026594	0.219098	-0.799404	-0.892482	-0.204075	0.665411	0.415779	0.191778	-0.440796	0.450482	0.866162	0.318054	-0.205303	-0.710004	-0.469877	-0.333294	-0.252045	0.182488	0.844434	-0.542203	-0.479658	0.048035	-0.420515	0.235452	-0.335595	-0.013366	-0.241713	-0.380808	-0.225965
frg_86	0.364366	0.132737	0.347508	0.033535	-0.616947	0.004606	-0.413992	-0.05479	0.330762	-0.101619	-0.086403	-0.173575	0.393744	0.428122	0.401819	-0.336356	-0.255405	-0.427055	-0.062189	-0.620108	-0.558604	-0.280057	1.12108	-0.525119	-0.095954	0.140536	-0.638103	-0.229485	-0.414753	0.880952	0.198987	-0.362191	0.173427	-0.338008	-0.009718	-0.432213	-0.643457	-0.027266	-0.011405	-0.143957	-0.103505	-0.021087	0.240809	0.239107	-0.336261	-0.392339	-0.6911	0.042328	0.152515
frg_307	0.631011	0.904087	-0.238692	-0.686278	0.35357	0.18294	0.168404	0.212785	0.039002	0.025399	-0.228054	-0.962425	0.452585	0.732623	0.478731	-0.054639	0.003588	0.037556	-0.275939	-0.171647	-0.032637	-0.193941	0.133144	0.335336	0.308058	-0.077363	-0.250382	0.634666	-0.0288	-0.473323	-0.520498	0.076504	-0.083243	-0.260028	0.006284	-0.067888	0.192037	0.626877	0.047744	-0.54499	0.017147	-0.244705	-0.716903	0.469218	0.217328	0.956306	0.290652	-0.583076	0.173412
frg_347	0.12955	0.659698	-0.058994	-0.146039	0.596718	0.351713	-0.331191	0.414764	-0.2531	-0.215327	-0.597647	-1.15737	-0.663158	-0.408537	-0.345824	0.347317	-0.016451	0.4828	0.047686	-0.531264	0.037055	0.370607	-0.096628	-0.538956	-0.017426	0.323897	-0.674981	-0.468925	-0.586561	-1.08263	1.30133	0.040338	0.003301	-1.44283	0.114294	-0.422729	-1.03125	0.820958	0.909572	-0.605841	-0.06945	0.136793	0.317217	-0.249664	-0.384895	-0.634497	-0.327443	-0.101307	0.320854
frg_746	0.212266	-1.00677	-0.171397	0.835	0.550554	0.453415	-0.968744	0.335123	0.298277	-0.5948	1.07139	0.134769	0.388236	0.441382	0.124579	-0.648811	-0.311112	-1.23882	-0.636739	0.398877	-0.911723	-1.48023	0.146027	0.06295	0.654511	-0.585256	-0.734659	-0.507647	-0.445482	-0.670796	0.326921	0.167082	0.131673	-0.640071	0.398979	0.607587	-0.532782	0.82088	-0.450082	0.187838	0.105602	-0.574698	0.894642	-0.250037	0.012548	0.142784	-0.286508	0.789328	0.035902
frg_737	0.104671	0.122154	0.717117	0.091744	0.041189	-0.058385	-0.562662	0.189777	-0.057287	-0.130387	0.518816	-0.507576	0.19577	0.561978	0.139896	-0.574612	-1.1329	-0.597006	-0.005653	-0.35879	-0.770518	-0.491231	0.000988	-0.846209	-0.050948	-0.230217	0.116844	-0.264947	-0.357466	0.201714	0.988142	0.801139	0.147278	0.307675	-0.616873	0.121966	0.076424	0.404367	0.654113	-0.915274	0.146812	-0.621833	-0.364189	0.447767	0.213828	0.215159	-0.488221	0.080844	-0.257888
frg_230	0.323765	0.210078	-0.409809	-0.22781	0.11963	-0.711637	-0.222165	-0.621741	0.026238	-0.367979	-0.552883	-0.008755	-0.078126	-0.297467	-0.241854	-0.553322	0.874672	0.423312	-0.037074	-0.288417	-0.071838	-0.076542	0.137777	-0.999528	-0.335261	0.253234	0.721752	0.671312	0.320956	0.59108	0.673841	0.0298	0.295384	-0.862984	-0.666358	-0.443933	-0.832554	-0.302936	-0.046005	-0.232242	-0.172064	-0.220412	-0.218056	0.061519	-0.363125	0.428952	-0.32793	0.145031	-0.011345
frg_136	0.16677	0.614358	-0.059057	-1.12462	0.294531	-0.083051	-0.183423	0.220148	0.473082	-0.018087	-0.408508	-0.44523	0.058279	0.325092	-0.545977	0.01672	0.339611	0.568705	-0.486821	-0.967456	-0.35279	-0.327394	-0.039806	0.104774	0.283727	-0.239106	-0.045374	0.519081	0.391956	-0.347097	-0.493688	-0.090514	0.33482	0.108469	-0.039881	-0.223986	-0.732978	0.268018	-0.108746	-0.361103	0.080998	0.103857	-0.431855	-0.194507	0.681585	0.372103	0.08772	-0.727143	0.052823
frg_455	0.444064	0.583642	-0.080622	0.030705	0.055739	-0.208487	-0.434967	0.090056	0.032931	-0.07862	-0.685324	-0.179474	-0.315923	-1.11731	0.503549	-0.350006	0.324182	0.064169	0.43016	-0.221196	0.527911	-0.059372	0.23228	-1.32369	-0.022754	0.499706	-0.083327	0.099522	-0.547986	0.576522	0.811001	0.057601	-0.031093	-0.783426	-0.818491	0.054528	-0.849374	0.587862	0.504125	-0.417117	-0.542686	-0.300562	0.541841	0.488492	-0.292435	0.120992	-0.834415	0.367841	-0.343405
frg_1417	0.264116	0.749086	0.504734	-0.272466	-0.123199	0.243783	-0.408191	0.598714	-0.712961	0.068396	-0.220534	-0.205308	-0.407363	-0.729118	-0.20143	-0.946143	-0.571117	-0.116301	0.264502	0.209183	-0.281256	-0.343356	-0.518305	-1.08639	-0.13356	0.434873	0.044373	0.39057	-0.289788	0.526482	1.30087	0.155909	-0.325577	-1.46506	-0.3639	-0.349325	0.316326	0.084373	0.726747	-0.332285	-0.281743	-0.283462	-0.026556	0.236218	-0.058605	-0.083096	-0.721212	0.424964	-0.318905
frg_1200	0.141681	0.82144	0.533592	-0.167431	0.281413	0.914909	-0.509955	0.68865	0.392069	0.422988	0.704032	-1.06737	0.205515	0.408887	-0.151387	-0.01462	-0.679502	-0.207547	0.564392	-0.292435	-0.55681	0.485023	-0.289511	-0.406421	0.470819	-0.048338	-0.167074	0.035284	-0.754319	-0.230067	0.154302	-0.399356	0.405229	0.413998	0.041874	0.67862	-0.104813	0.130884	0.066058	0.229563	0.361053	0.422893	-0.699696	0.47624	-0.148935	-0.134344	-0.276572	-0.493798	0.548498
frg_704	0.648335	0.960636	-0.043364	0.331473	-0.341512	0.047839	-0.415832	-0.255278	-0.082239	0.039849	-1.15628	-0.202505	-0.01432	-0.639884	0.104188	-0.442411	0.473066	-0.087985	0.27686	-0.336317	0.347403	-0.246974	-0.208271	-1.43239	-0.045571	0.151661	-0.325927	0.231802	-0.628084	0.4927	1.07277	-0.211243	0.074145	-1.25906	-1.18073	-0.183015	-0.795039	0.227293	0.203568	-0.444637	-0.180774	-0.329394	0.772841	0.24899	-0.112636	0.405786	-0.435796	0.058865	-0.572906
frg_202	0.972573	1.09509	-0.155438	-0.502132	0.658602	0.486306	0.541202	0.284696	-0.231464	0.70886	-0.236105	-0.6687	-0.976524	0.823298	-0.094378	-0.174789	-0.03013	0.153185	-0.710508	0.024334	0.547445	-0.076067	-0.041807	0.192655	0.633221	0.461457	-0.84317	0.195221	-0.349819	-0.248999	-0.142447	0.348287	0.014075	-0.612181	-0.031289	1.17882	-0.768932	0.385745	1.18055	-0.735744	0.840218	0.070961	-0.933813	-0.123221	0.392057	0.106828	0.78652	-1.06493	-0.151986
frg_485	0.382018	0.030355	-0.049001	-0.036534	0.081776	-0.165988	-0.339001	-0.066068	-0.039879	0.000808	-0.295185	-0.936835	0.501386	0.252798	-0.495236	0.067469	-0.669497	0.384866	0.251295	-0.273377	0.062011	-0.17129	0.172496	-0.359319	-0.070389	-0.236383	0.855436	0.586981	-0.627782	-0.16517	-0.108393	0.040728	0.160923	-0.256623	-0.328229	-0.407759	-0.855217	0.553723	-0.25322	-0.068728	0.098349	0.065591	-0.523742	-0.506251	0.001862	0.453832	-0.538257	-0.572663	0.208079
frg_341	0.107408	-0.383992	0.028218	-0.405018	-0.803714	-0.048652	-0.179542	-0.258218	-0.432939	-0.182133	-0.068477	0.226624	0.467919	0.275119	-0.444761	-0.201294	0.312576	0.469865	-0.472803	-0.156754	-0.501611	-0.334998	0.705865	-0.079067	-0.242509	0.018106	0.145611	0.08324	-0.709078	0.65509	0.333946	0.289696	0.331447	-1.10264	0.3104	-0.203116	-0.685114	-0.111207	-0.535963	0.30926	-0.355044	0.338656	0.615053	-0.225408	0.386649	0.12098	-0.896107	-0.075979	0.560178
frg_895	0.499061	-0.455503	0.265687	-0.136229	0.702974	0.77301	-0.771065	-0.127975	0.717815	-0.800695	0.097889	-0.433737	-0.151772	0.841296	0.550447	0.267954	-0.558508	-0.784247	-0.352354	-0.226707	-0.526685	-0.806458	-0.697776	-0.180128	0.759039	-0.627447	-0.266	0.767054	0.45574	0.122251	-0.359084	-0.612065	0.495954	0.883766	0.153216	0.383951	-0.356352	0.000866	-0.60268	-0.478568	0.088412	-0.798777	-0.290321	0.905539	0.551585	0.598959	0.581746	-0.192798	-0.191929
frg_224	0.442235	0.633367	0.518998	0.241981	-0.765842	-0.033839	0.000948	-0.401278	0.517788	-0.083352	-0.050643	-0.304263	0.557408	-0.371661	0.331002	-0.741214	0.162606	-0.590717	0.255034	-0.495592	-0.176956	-0.290168	1.03183	-0.856836	0.08702	0.361615	-0.348563	-0.180944	-0.527814	0.762311	0.200362	-0.265584	-0.035	-0.30956	-0.143096	-0.672961	-0.979352	-0.159736	0.0791	-0.061749	-0.180785	0.198272	0.013394	-0.06702	-0.362513	-0.377174	-0.593944	-0.186646	0.26745
frg_322	0.449766	0.373174	1.08341	-0.316497	-0.651279	-0.191278	-0.266024	-0.413773	0.565158	-0.028587	-0.055208	0.057091	0.681926	-0.282247	-0.010924	-0.60388	0.179928	-1.33199	-0.131913	-0.311	-1.36781	0.111306	0.109621	-0.423264	-0.030068	-0.055533	0.536258	-0.146585	0.654047	1.49508	0.693163	-0.040112	0.697868	-0.113744	0.159332	-0.48368	-1.0363	-0.462859	0.271817	-0.086562	-0.130188	0.589718	-0.006613	0.42367	-0.324971	-0.140202	0.17086	0.174798	0.352514
frg_851	0.888322	-0.476661	0.237961	0.174523	0.316318	-0.095295	-0.69281	0.180811	0.083029	-0.271339	0.332881	0.013646	0.632986	-0.755105	-0.393321	-0.519771	0.037663	-0.698101	-0.97636	-0.048809	-1.02693	-0.477794	-0.162725	-0.299423	0.40455	-0.395591	-0.147274	-0.24104	-0.459125	1.35464	0.266061	-0.445566	0.343205	-0.40033	-0.076183	-0.542563	0.244281	0.434143	-0.813337	0.077675	0.526182	0.052729	-0.150942	0.218397	0.335944	-0.28954	-0.37503	0.868998	0.663027
frg_371	0.852449	0.184489	0.027122	-0.361148	-0.110872	0.488712	0.794116	-0.536703	-0.785975	-0.170632	0.036077	-0.178401	0.395162	-0.108791	-0.721559	0.239483	0.1831	0.074601	-0.364402	0.335966	0.16203	-0.611933	0.169394	-0.028354	-0.174253	-0.510498	0.480847	-0.344615	-1.38073	0.302516	0.139448	0.722104	0.053345	-0.952766	0.357243	0.492138	-0.436089	-0.202765	0.631982	0.643913	-0.841525	0.076136	-0.212451	0.097325	0.208107	0.386532	-0.17389	-0.030782	-0.106127
frg_440	0.420891	-0.84363	0.823475	-0.201696	-0.098574	1.02804	-1.02216	0.132915	0.307895	-1.04885	-0.918708	0.483347	-0.079461	0.063863	-0.257501	0.236072	-0.756318	-0.200484	-0.810676	0.002157	-0.531378	-0.736995	-0.111198	0.246696	0.183719	-0.218141	-0.234396	-1.44958	-0.208599	0.690163	0.41219	0.554711	-0.367626	-0.481474	0.160406	-0.518637	-0.984069	-0.593343	-0.109792	-0.266358	0.080513	0.760267	0.116441	0.160539	0.63723	-0.139014	-0.010048	0.32067	0.427162
frg_1729	0.801038	0.185036	0.352779	0.895673	0.214148	0.355407	0.117314	0.616719	-0.318259	-0.273735	0.193003	-0.294806	0.339895	0.908268	0.104479	-1.19285	-0.264125	-1.00177	-0.549078	0.050303	-1.21813	0.311764	-0.144887	0.369948	0.41188	-0.116903	-0.216878	-0.486957	0.208603	-0.484913	0.427444	-0.363056	0.145847	0.280774	0.013976	-0.321929	-0.104868	0.827037	0.042177	-0.088496	-0.567975	-0.459198	0.830161	-0.232723	0.38704	0.371665	0.362359	-0.148588	-0.360967
frg_414	1.03897	0.914497	1.59079	0.303277	-0.883584	0.431493	-0.833164	0.024267	0.205444	-0.558311	0.406271	0.531829	0.483928	-0.188806	0.133542	-0.919547	-0.715724	-1.52585	0.163176	-0.140036	-1.08495	-0.896404	-0.056506	0.475788	0.384842	0.548442	-0.572386	-0.747685	0.436703	0.227077	0.959961	0.044891	-0.18498	-0.157351	-0.079007	0.211942	-0.573532	0.281414	0.39446	-0.274776	0.826845	0.650526	-0.181477	-0.704458	-0.073549	0.16112	-0.339661	0.067182	0.450686
frg_353	0.602519	-0.11296	0.134773	-0.122884	-1.03292	0.311001	-0.55645	-0.876864	0.14714	-0.316119	-0.283175	0.528176	0.341371	0.091843	0.260988	-0.997738	-0.578969	-0.2393	-0.150964	0.214943	-0.668667	-0.462682	0.686548	-0.469348	-0.913004	0.438566	0.015772	-0.364507	-1.17884	0.935079	0.559612	0.117123	-0.561945	-0.052784	0.349948	-0.163477	-0.735153	-0.629024	-0.397773	0.417233	0.354164	0.121629	-0.226302	-0.454261	0.183997	-0.052718	-0.071802	-0.153279	-0.241046
frg_1739	0.757381	0.159377	0.51943	0.354692	0.714582	-0.603461	-0.266946	0.486541	-0.121072	-0.045658	0.304212	-0.10408	0.849092	1.11123	-0.064726	-1.0921	-0.430968	-0.911267	-0.042731	0.323242	-1.06879	0.140372	-0.278143	-0.061353	-0.018054	0.143327	-0.13259	-0.493456	0.318042	-0.135572	1.02095	-0.128905	-0.105557	0.619403	-0.142152	-0.471812	-0.247466	0.692299	0.156422	0.514985	-0.612609	-0.230581	0.376639	0.015316	0.196538	0.220963	0.185181	-0.430617	-0.299052
frg_382	0.491701	-0.091556	0.484835	-0.081062	-0.693974	-0.113541	-0.073898	-0.709723	0.016237	-0.076995	0.191955	-0.392355	0.420501	-0.779237	0.433719	-0.390329	0.361726	-0.708661	-0.899366	-0.493425	-0.474085	-0.152442	0.852645	-0.167367	-0.086057	0.281966	0.018229	-0.064042	0.041703	1.4981	0.316538	-0.217447	0.31229	0.05527	0.12345	0.219142	-0.748526	0.277671	0.229467	0.188773	-0.125564	0.665653	0.112291	0.49923	-0.673369	0.243906	0.079966	0.202379	0.734838
frg_900	-0.340233	0.850224	-0.456724	-0.585488	-0.129026	0.232862	-0.419434	0.662007	0.543086	-0.151793	-0.198772	0.129981	-0.482796	-0.425078	0.721428	-0.17943	-0.184201	0.297846	-0.222636	-0.206909	-0.164175	-0.134013	0.0806	-0.729398	-0.438008	0.664241	-0.273162	0.703691	0.410296	-0.226198	-0.707217	-0.666342	0.003542	-0.92974	0.20097	-0.57162	-0.673854	0.132282	-0.213396	-0.336803	0.445892	-0.543954	0.140283	0.933622	-0.094954	-0.254919	-0.309781	-0.113134	-0.096666
frg_773	0.017883	-0.39292	0.46656	0.154138	0.281881	-0.024174	-0.670147	0.502645	0.316621	-0.85464	0.43074	-0.934143	0.556334	0.126916	-0.296205	-1.05617	-0.128792	-0.482125	0.235995	-0.353937	-0.752577	-1.21354	-0.160698	0.245279	1.18667	-0.207069	-0.259975	-0.444224	-0.449164	-0.525482	0.411745	-0.155999	-0.270224	-0.964041	-0.072448	-0.128265	-0.717043	0.525909	-0.118887	0.287944	-0.122942	0.162967	-0.338537	-0.288451	0.322554	0.244778	-1.0596	0.410726	0.024809
frg_427	0.533104	-0.105368	0.590379	0.141979	0.874795	0.411787	0.009362	0.717903	0.463773	-0.19449	0.783709	-0.643269	0.003624	0.352622	0.020971	-0.642205	-0.519959	-0.546366	0.332944	0.312634	-0.419163	-0.286382	-0.36551	0.414682	0.443544	-0.364364	0.363868	-0.338139	-1.17599	-0.319285	0.477334	0.070546	-0.143614	-0.605329	-0.156264	0.639991	-0.663878	0.791171	0.295037	0.104655	-0.39422	-0.426235	-0.096672	-0.114377	0.180456	-0.33856	-0.608348	0.333817	-0.269031
frg_366	0.407029	0.588358	-0.617825	-0.076418	0.318617	-0.779471	-0.354518	0.280488	-0.412185	-0.077185	-0.459069	-0.078618	-0.177282	-0.471687	0.546187	-0.507646	0.330162	0.466395	-0.159944	0.190193	-0.019999	-0.307133	-0.194966	-0.739278	-0.242364	1.29295	-0.174962	1.09254	-0.556469	0.468652	0.518238	0.215683	0.122061	-1.23644	-0.732699	-0.25839	-0.761317	-0.445298	0.154197	-0.338563	-0.12955	-1.08621	0.115623	0.078578	0.445731	0.04015	-1.07077	0.67663	0.503586
frg_236	0.405742	0.663497	-0.113735	-0.337573	-0.325564	0.239795	0.044684	-1.01255	-0.842019	0.047214	-0.02832	0.518437	-0.33401	-0.912849	-0.592683	0.338909	-0.376549	0.069241	-0.27551	-0.27438	0.487029	-0.062735	-0.484977	-0.98739	-0.344062	-0.043527	0.018564	-0.26422	-0.596917	0.631111	-0.22141	0.246251	-0.000713	-1.13436	-0.40415	0.055587	-1.25366	-0.260684	-0.43373	-0.01597	0.388974	-0.510347	0.203251	0.16702	-0.518407	-0.027471	-0.075176	0.310472	-0.286278
frg_1216	0.56665	0.067612	0.722911	-0.887395	0.104968	0.63254	-0.693932	-0.05532	0.041624	-0.379646	-0.479642	0.378656	-0.009118	-0.138698	-0.743294	-0.095539	0.190647	-0.405245	-0.2324	-0.245018	-0.556799	-0.60294	-0.03091	-0.069151	-0.198157	-0.050796	-0.115091	-0.120531	0.303089	-0.15644	0.632545	0.078135	-0.250544	-0.028302	0.140809	-1.13632	-0.015665	-0.145703	0.490481	-0.682954	-0.346564	0.215874	-0.565842	0.498975	-0.169594	0.139708	-0.256771	-0.212734	0.22102
frg_146	0.976763	0.276898	0.438147	0.283314	-0.841598	-0.539167	-0.35045	0.269535	0.027176	-0.654056	-0.305074	-0.244187	1.53551	-0.523764	-0.314111	-0.228614	0.381231	-0.626315	-0.032413	0.116589	-0.927114	0.583856	0.205187	-0.12087	0.011586	-0.214991	0.051584	-0.073234	-0.574172	1.18794	0.015686	0.005458	0.888202	0.054721	-0.438861	-0.634549	-0.107205	0.748036	0.297019	0.036384	-0.220995	0.04543	0.14641	-0.125545	0.379243	-0.11849	0.076464	-0.031361	0.532217
frg_512	0.060413	0.115275	-0.74746	0.130745	0.736337	-0.292267	0.219477	-0.295511	-0.479875	-0.04085	-0.595892	-0.446685	0.417778	-0.058577	-0.304835	-0.061156	0.185879	-0.269058	-0.373477	-0.48678	0.364893	0.269564	-0.04603	-0.772585	-0.283656	0.206674	-0.354592	0.447925	-0.489866	-0.211562	0.512392	-0.485238	-0.329426	-1.81079	0.003866	0.06316	-1.12263	0.407992	0.165791	-0.052901	-0.25973	-0.64815	0.681779	0.731291	0.267109	0.560342	-0.567265	0.993218	0.149411
frg_350	0.19119	-0.362691	0.700633	-0.152792	0.863851	0.280436	-0.738413	0.288044	0.645047	0.986435	-0.184671	-0.11814	-0.442056	-0.183639	1.24863	0.291251	-0.934303	-0.313399	-0.789448	0.015651	-0.822393	-0.659905	0.171164	0.325482	0.043336	-1.05977	0.947637	0.515616	-0.17627	0.147321	-0.751098	-0.617762	0.428967	0.839884	0.303085	0.04107	-0.162634	0.208913	0.241226	-0.194577	-0.306497	-0.375817	-0.203977	0.379652	-0.063055	-0.140295	0.976052	0.528965	0.37367
frg_726	-0.478343	-0.376163	0.308884	-0.581994	-0.252974	0.217549	-0.993392	0.762321	-0.34828	0.053143	0.521945	-0.357851	-0.712898	-0.115164	0.522425	-1.1213	-0.118979	-1.05493	0.315266	0.520222	-0.417706	-1.60028	0.797543	-0.146392	0.290449	-1.06532	-0.068929	0.729473	-0.596293	-0.453021	0.639034	0.27757	-0.277427	-0.009223	-0.525741	-0.342118	0.06769	-0.436514	0.297426	0.128887	0.195602	-0.715293	-0.952905	0.239682	0.593756	-0.035809	-0.668289	0.535112	0.781422
frg_879	0.791664	-0.311151	0.459406	0.217503	0.271692	0.273607	0.211103	-0.402713	-0.237614	-1.04573	0.965295	0.236225	0.240311	0.432631	0.519346	-0.526568	-0.095009	-0.91373	-0.319739	1.03247	-0.732197	-1.37332	-0.672769	-0.489	0.435081	-0.759027	0.430903	-0.704327	-0.799486	-0.269074	0.162209	0.413883	-0.21022	-1.00576	0.236918	0.809613	-0.334865	0.454538	-0.562891	0.480689	-0.246935	-0.291686	0.283012	0.068011	0.123486	0.085189	-0.848869	0.771128	-0.196289
frg_495	0.577294	0.595749	0.690575	0.133421	0.144002	-0.53777	-0.158134	0.089043	-0.005509	0.419047	-0.236013	0.426099	1.00878	0.509174	-0.128648	-0.891914	-0.156477	0.090689	0.089107	-0.355709	-0.97473	-0.143445	0.013639	-0.875624	-0.063205	0.126924	0.502882	0.078411	-0.50338	0.100039	0.482732	-0.876757	0.457053	-0.71434	-0.476685	-0.244142	-0.950699	-0.219521	0.128966	0.145099	-0.542915	0.39868	0.335845	-0.339001	-0.096371	-0.492998	-0.658695	-0.015523	-0.016062
frg_1215	0.069645	-0.206442	0.138155	-0.214392	0.176676	-0.332063	-0.608069	-0.561127	0.655535	0.653694	-0.36248	0.207952	0.601309	0.493583	-0.088601	-0.514897	0.174682	-0.102726	-0.374594	-0.018764	-0.773083	-0.816375	-0.076919	-0.092074	-0.473807	-0.468581	1.19595	0.234142	-0.139303	-0.157443	-0.293196	-0.968148	0.650483	0.287634	0.398036	-0.195797	-0.279864	0.268063	-0.14576	-0.169096	-0.199906	-0.139184	-0.050785	-0.301908	0.694581	0.444618	-0.023059	0.224566	0.119628
frg_435	1.51956	-0.167396	0.980572	0.097234	0.413675	0.492265	-0.196158	0.323952	0.727212	-0.441701	-0.170812	1.01378	0.911746	-0.046283	0.756497	-1.11368	-0.11623	-1.60357	-0.302352	0.278116	-0.566762	-0.370269	1.50018	-0.323064	0.172074	0.414829	-1.29244	-0.636997	-0.066521	-0.11518	1.49889	-0.303234	0.460394	-0.457403	0.046441	-1.08393	-0.310804	-0.25304	-0.370979	-0.630317	-0.533883	-0.93406	-0.21146	0.105385	0.898455	-0.855898	-0.541745	0.777604	-0.471089
frg_1293	0.574288	0.540349	-0.039555	0.422702	0.341617	-0.981794	-0.158047	0.7644	-0.281252	0.354562	-0.14074	0.191321	0.652165	-0.210962	0.500898	0.022933	-0.369109	-0.628546	0.099407	0.326395	-0.618303	-0.340741	0.012704	-0.856758	-0.293579	-0.219169	-0.042751	0.035958	-0.704014	0.637385	0.205584	0.095325	0.315508	0.003023	-0.826237	0.744316	-0.768747	-0.40327	0.288321	-0.163473	-0.076989	-0.717847	-0.218791	0.560158	0.751923	-0.486682	-0.179534	0.540007	-0.960744
frg_1586	0.920865	0.644122	-0.138516	0.051147	-0.109047	-0.068941	-0.391952	-0.29921	0.87925	-0.075552	-0.085	0.314	0.175825	-0.137144	1.04906	0.060245	0.010185	-0.325516	-0.226806	-0.588037	-1.01764	-0.577204	-0.402098	0.281285	0.269446	-0.505837	-0.763036	0.024957	-0.042187	0.215273	-0.344032	-1.0657	1.72195	1.24381	-0.071355	0.391014	-0.210355	0.100419	-0.490863	-0.611118	0.360898	-0.225257	-0.278666	0.462257	0.558909	0.361447	0.342258	-0.660754	-0.432049
frg_451	-0.055106	0.90325	-0.338583	-0.633134	0.003643	0.216552	-0.600587	0.054682	0.392065	-0.023912	-0.266889	0.436293	-0.90613	-0.62538	0.448854	-0.456197	0.372768	0.099538	-0.252951	-0.468875	-0.500173	-0.856676	0.407318	-0.887816	-0.780438	0.632955	-0.409224	0.075348	-0.284409	0.025915	0.625005	-0.120949	0.362595	-1.57037	-0.022643	-0.696644	-0.688229	-0.169679	0.210563	-0.16246	0.162566	-0.33263	0.281548	0.293491	0.054657	0.084903	-0.282806	0.450501	-0.258096
frg_501	0.307498	0.049785	0.851046	0.069205	-0.506064	-0.187648	-0.204888	-0.194067	-0.097618	0.748309	-0.710665	1.23804	0.41498	-0.463762	0.299076	-0.740555	0.173633	-1.2342	-0.62986	-0.613143	-0.309057	-0.773845	0.18311	-0.530458	0.273155	-0.159518	-0.575663	-0.263922	-0.19413	0.962316	0.34961	-0.206895	0.112719	-0.84332	-0.300083	-0.592803	-0.726184	-0.186236	-0.466864	0.008817	-0.527925	0.002972	-0.539122	0.726114	0.463433	-0.282251	-0.253331	0.29469	0.278164
frg_342	0.772033	-0.241425	0.620637	0.379222	-0.246633	0.99157	-1.15922	0.094222	0.382892	-0.502854	0.064712	0.760784	-0.476889	-0.117282	-0.459389	-0.262561	-0.879679	-0.618215	-0.74616	0.250639	-0.804281	-1.16091	-0.102824	0.143759	0.418628	-0.5508	-0.117944	-1.84784	-0.07595	0.917861	0.497136	0.567473	0.000937	-0.481378	-0.113162	-0.314456	-0.539606	-0.696084	0.238467	-0.650003	0.245395	0.776347	-0.004313	0.279756	0.814829	-0.118552	-0.313901	0.68501	0.377606
frg_700	1.18397	-0.5695	-0.099334	-0.06815	1.35428	0.252751	-0.958035	-0.039551	0.71416	-0.655154	0.285644	-0.762655	0.472229	-0.325031	-0.34081	-0.990966	-0.107479	-0.895485	-0.128957	-0.188843	-0.386176	-0.533554	-0.79645	-0.271165	0.536837	-0.463181	-0.218991	-0.738752	-0.899536	-0.175177	0.957533	0.233198	-0.256023	-2.72782	0.29744	0.329927	-1.14662	1.28864	-0.253409	-0.442761	-0.553354	-0.257063	0.328264	0.104317	0.350037	-0.12189	-1.41176	1.65318	-0.257524
frg_346	0.828621	0.282842	0.12988	0.030363	-0.254848	0.119321	-0.596881	-0.084775	0.720629	-0.20816	-0.789604	-0.045258	0.197794	-0.766924	0.190227	-0.736035	0.295107	0.136928	0.288721	-0.402847	0.291902	-0.018633	-0.014414	-0.622034	0.094103	0.336684	-0.377761	0.189088	-0.444459	0.184478	0.667231	-0.092273	-0.172655	-0.959413	-0.908673	-0.39573	-0.764314	0.018266	-0.382137	-0.492658	-0.30903	-0.094363	0.402638	0.236016	-0.090897	0.424472	-0.575649	-0.038303	-0.399773
frg_330	0.370939	0.724346	0.949925	0.307372	0.338682	0.126601	-0.55482	1.77136	0.173579	1.03427	0.036718	-0.89305	-0.242517	0.478508	1.13222	-0.104266	-0.284877	-0.471215	0.609796	0.727887	-1.23772	-0.232994	0.04381	0.284998	-0.559531	-0.693717	-0.169465	0.021744	0.127566	-0.135939	-0.19693	-0.219298	-0.394294	-0.010066	0.105333	0.688246	0.104467	0.976997	0.754725	0.027398	0.276362	-0.279993	-0.772879	0.70134	0.264433	-0.087501	0.502228	-0.491835	-0.144123
frg_1185	0.524614	0.790561	0.199507	-0.400202	-0.25433	0.699092	0.299484	0.913364	0.349904	-0.488307	-0.219049	-0.576817	0.177212	1.01029	-0.413956	-0.474441	-0.144836	-0.389173	0.60662	-0.356753	-0.357085	0.221559	0.055388	0.0198	0.842432	-0.11305	-0.314538	0.884408	-0.171932	-0.552613	0.218718	-0.019347	0.417661	-0.390262	0.288903	-0.011439	-0.381078	0.040863	-0.234204	-0.304716	-0.065206	-0.211347	-0.435204	0.606151	0.048727	0.690382	0.205264	-0.645161	-0.238477
frg_1588	0.439532	-0.015472	0.299182	0.145241	0.491273	0.0938	-0.427248	0.695126	0.278779	-0.822519	0.695533	-0.349028	0.182346	-0.418042	-0.421267	-0.067975	0.059403	-0.448662	-0.945654	-0.046498	-1.15186	-0.462422	-0.501185	-0.446228	0.918885	-0.210719	-0.822259	-0.046508	-0.189364	0.841419	0.112869	-0.730497	0.70686	0.133585	-0.652226	0.043862	-0.244929	0.629639	-0.841629	-0.344291	0.339156	-0.173973	-0.270141	-0.074114	0.240455	0.161138	0.225963	0.734155	0.457038
frg_444	-0.057248	0.445131	-0.373188	-0.348864	0.292575	-0.004076	-0.572991	0.456019	-0.171952	0.617454	0.192042	-0.837209	-0.114537	1.27166	0.323404	0.485476	-0.17123	0.070463	-0.506817	-0.002299	-0.08476	-0.316221	0.375688	0.290383	-0.25028	-0.518857	-0.003316	0.355103	-0.413918	-0.474628	-0.511553	0.543239	0.548152	-0.236135	0.344796	0.377648	-0.034549	0.256293	0.278177	-0.338649	-0.097456	0.006779	-0.529839	0.37755	0.307406	0.768054	0.79996	-0.564692	0.459372
frg_792	0.326425	0.570107	-0.337815	-0.606318	0.459404	0.573429	-0.505367	-0.101058	0.032095	0.144413	-0.566943	-0.309636	-0.325029	-0.244968	-0.564012	0.205627	-0.29111	0.102779	0.081818	-0.56906	0.039125	0.424522	-0.454934	-0.116202	-0.391388	0.216984	0.090065	0.523441	-0.420177	0.004553	-0.065532	-0.471334	-0.030425	-1.39322	-0.423678	-0.698493	-0.77217	0.22023	0.301504	0.278382	-0.379542	-0.294749	0.645386	0.113815	-0.171113	0.551481	-0.188405	0.283572	-0.428422
frg_759	0.555674	-1.11685	0.314525	0.970436	-0.335344	-0.194856	-1.19433	0.391953	0.112334	-0.561507	0.823233	0.475398	0.435021	0.232793	-0.612351	-0.211507	-0.30424	-1.0004	-0.839966	0.29162	-1.1641	-0.573806	1.30593	-0.115937	0.177103	-0.559226	-1.17984	-0.6423	-0.984862	1.51307	0.604088	-0.262692	0.841969	-1.01598	0.177941	-0.105324	-0.354783	0.562737	-0.337446	-0.239313	0.438886	0.189631	0.494568	-0.46101	0.288917	-0.645144	-0.546239	1.15756	0.217647
frg_1273	1.28904	-1.20008	0.717657	0.177883	0.62825	1.05245	-1.09091	0.06559	1.10436	-0.226786	0.512259	0.991004	0.654134	-1.1562	0.063355	-0.292795	0.354543	-0.881179	-0.259268	-0.077269	0.195601	-1.18107	-0.528628	-0.100533	0.782892	-0.903276	-0.561533	-0.881743	-0.914916	0.266457	0.646261	0.017724	-0.223954	-1.25673	-0.070939	0.355586	-1.30608	0.556684	-0.574396	0.688872	-0.28507	0.302906	0.205569	0.182448	0.35674	-0.193587	0.069232	1.08498	0.010934
frg_374	0.887982	0.34205	0.991316	-0.016909	-0.478049	0.212067	-1.05872	1.37561	-0.733823	0.247609	0.047936	0.33596	0.836419	-0.379988	-0.417139	-1.04432	0.325585	-1.44003	0.328643	0.152644	-0.768172	-0.801962	1.13122	0.286369	0.309976	-0.789853	-0.74039	-0.333862	-0.521118	-0.390811	0.936953	0.003816	-0.382548	-0.264494	-0.161387	-0.00759	-0.205828	-0.341995	-0.027537	-0.437079	-0.500096	0.205324	-0.917435	-0.087255	0.603807	0.274343	-1.02309	0.114493	0.059238
frg_312	-0.191106	0.498685	-1.05793	-0.504696	-0.150901	0.182348	-0.089185	0.340507	0.175025	-0.112703	-0.759708	0.247561	-0.425938	-0.632884	0.377218	-0.281916	0.926272	-0.163529	-0.44893	-0.441676	0.053288	-0.626503	-0.140602	-0.512944	-0.250158	0.607436	-0.791847	0.026748	-0.625288	0.149821	0.197481	-0.293097	0.126708	-1.17004	-0.468468	-0.787856	-0.336422	0.38224	-0.079936	-0.846337	0.204884	-0.815979	0.384397	0.287428	-0.3832	0.124306	-0.425668	-0.026322	0.374785
frg_511	0.359581	0.140731	-0.003995	-0.572501	0.370998	0.012836	-0.207621	0.256862	-0.577802	-0.222738	-1.06522	-0.355876	0.168222	-0.271556	-1.11821	-0.807321	0.195381	0.435761	0.526185	-0.132494	-0.306611	0.086229	-0.234575	-0.79884	0.144578	0.103249	0.012483	0.141594	-0.937369	0.152173	1.29811	0.038257	-0.161846	-1.66254	-0.495722	-0.183505	-0.966031	0.2876	-0.1045	0.051075	-0.204697	-0.039923	0.571037	-0.244686	-0.314918	0.263829	-0.850164	0.425515	-0.076903
frg_471	0.650192	-0.080139	-0.191432	-0.107434	-0.052534	0.818331	-0.945904	0.19257	0.178864	-0.08724	-0.411888	0.253604	-0.198279	-0.923465	0.193568	-0.62721	-0.152894	-0.58827	0.273426	-1.06173	-0.39705	-0.408154	-0.246797	-0.249427	-0.221565	0.178589	-0.605874	0.246814	-0.629645	-0.383781	0.945141	-0.412518	-0.599719	-1.20638	0.185748	0.029288	-0.406728	0.239257	-0.149523	-0.035395	0.049156	0.221851	-0.303789	0.029135	-0.233234	0.06748	-1.09558	0.629516	-0.455674
frg_117	0.334472	-0.384033	0.273756	-0.50845	0.347885	0.063111	-0.501502	0.109898	-0.086078	-0.440907	-0.229155	-0.24779	0.016531	-0.150237	-0.287035	0.160112	-0.38436	0.550446	0.343051	-0.278423	-0.158508	-0.278596	0.258149	-0.683287	0.257138	-0.284596	0.638956	0.475287	-0.211377	0.122712	-0.109218	-0.22327	0.239199	-0.643221	-0.255913	-0.412015	-0.413627	0.85027	-0.444001	-0.048912	0.363716	0.083843	-0.201536	-0.473165	-0.628547	0.648705	-0.696687	-0.723691	-0.006008
frg_1184	0.531712	0.868515	0.219374	0.071112	-0.028973	0.269976	-0.134409	0.997467	-0.166277	0.410028	0.11401	-0.706296	0.402846	1.25695	0.619926	-0.191264	-0.209792	0.132377	0.371726	0.618707	-0.194114	0.255692	0.338264	0.106439	-0.168285	-0.136181	-0.466438	0.70202	-0.435061	-0.598002	-0.218295	-0.229217	-0.394416	0.142107	0.347518	0.321891	0.812921	0.971579	0.176572	-0.063103	0.12047	-0.06632	-0.500126	0.466811	0.886279	0.287053	0.060463	-0.290082	-0.08352
frg_517	-0.191075	-0.11392	0.026907	-0.092615	-0.782275	-1.04838	-0.238905	-0.691432	-0.170174	-0.793782	0.005377	-0.899425	-0.640646	-0.400372	0.876942	-0.168659	-0.745204	-0.349816	-0.912432	-0.17111	-1.45373	-1.31974	0.693936	-0.478418	-0.469799	-1.1142	0.745171	0.038063	0.62251	1.00505	0.492932	0.259849	0.87675	0.251212	0.668294	0.208442	-0.474752	-0.564227	0.05716	0.475461	0.028197	-0.041531	-0.165574	0.931266	0.565347	0.078015	0.651294	-0.191857	0.957653
frg_718	0.162365	0.123299	-0.426338	0.242268	0.702666	-0.172823	-0.87356	-0.132095	-0.155148	0.09313	-0.526547	0.312798	0.576148	0.066387	0.276681	-0.495952	-0.311553	-0.259686	-0.356071	-0.226116	-0.924182	-1.28374	-0.118222	-0.08092	0.209013	-0.044374	-0.293229	-0.394444	-0.598066	-0.633671	0.121958	-0.180172	-0.032111	-1.11738	-0.07072	-0.217989	-0.613496	0.176427	-0.189647	-0.029338	0.246658	-0.609352	-0.650343	-0.869216	0.715689	0.015925	-0.304339	-0.425084	0.900292
frg_872	0.929853	0.285516	1.55624	0.003171	0.145905	-0.164097	-0.374778	0.58189	-0.229658	-0.079808	-0.11833	-0.774578	-0.066629	-1.19223	1.16499	-0.253008	-0.353349	-0.8497	0.959693	0.062335	-0.60145	-0.788334	-0.054239	-0.539634	0.755846	-0.440748	-0.794932	0.474119	0.375543	0.062077	0.472517	0.708583	-1.13763	-1.14719	0.117572	0.828721	-0.374076	0.208387	0.749907	-1.43678	0.111351	-0.49097	0.123217	0.489095	0.598851	0.284666	-1.11172	0.678434	-0.477863
frg_908	1.02055	0.61682	1.49801	-0.061545	0.173809	-0.045272	-0.060581	0.199797	-0.094307	-0.056468	-0.181716	-0.88067	0.025879	-0.97767	0.599251	-0.797907	-0.390202	-1.32929	0.965452	-0.114698	-1.00416	-0.598088	0.044025	-0.044926	0.563689	-0.226453	-1.00959	0.993236	0.36637	-0.031349	1.14088	0.473563	-0.938725	-1.56279	0.539459	0.997518	-0.790611	0.499737	0.973517	-1.45663	-0.551734	-0.38018	0.468848	0.643081	0.53841	0.427036	-1.35372	0.788531	-0.75834
frg_658	1.21904	-0.176308	-0.470677	0.55038	0.752365	0.240174	0.190955	-1.07846	-1.28653	-0.217469	-0.417449	-0.177251	0.764466	0.382598	-0.407391	0.542685	0.364673	-0.256618	-0.426408	-0.20502	0.248472	-0.521981	0.11154	-0.771389	0.302401	-0.217019	-0.241267	0.713003	-1.60669	0.702939	0.386697	0.310189	-0.18826	-1.28495	-0.097652	1.25128	-0.942412	-0.022721	0.370337	-0.499589	0.048835	0.201075	0.417106	0.222919	1.03336	0.232999	-0.176359	0.60515	-0.556071
frg_387	0.424807	0.69115	0.202351	-0.540097	0.206535	0.550585	0.14651	0.414226	-0.416892	0.134544	-0.259994	-0.608279	0.699369	0.58297	0.278376	-0.645059	0.116842	-0.456326	0.110835	-0.224838	0.169014	0.157413	0.028014	0.419105	0.127421	0.161655	-0.327433	0.286633	-1.03787	-0.443324	0.491181	0.107322	-0.072052	-0.735213	0.355032	-0.012642	0.243166	0.191457	0.106888	-0.117207	-0.29677	-0.333657	-0.908782	0.503961	0.301345	0.290154	-0.115478	-0.485258	0.461235
frg_724	0.644658	0.44237	-0.526663	-0.498568	0.150227	1.25883	-0.337199	0.568882	-0.370132	-0.86321	-0.005626	-0.723543	-0.076755	0.725979	-0.319451	0.083986	-0.330888	-0.154475	-0.250845	-0.767613	-0.180456	-0.239953	-0.485409	0.526237	1.66258	-0.35366	-1.2568	0.619314	-0.306503	-0.584093	-0.386916	-0.122778	0.18494	-0.01523	0.056594	0.47724	-0.402735	0.479668	-0.717298	-0.743766	-0.126394	-0.135232	-0.229143	0.436876	1.11844	0.978288	0.401815	-0.197122	-0.129633
frg_1341	1.43572	-0.356819	0.356434	0.864601	0.092617	-0.410212	0.513217	-0.126061	-0.278537	-0.165986	-0.066787	-0.340947	0.540058	-0.042576	-0.112932	0.019618	-1.26533	-1.20156	-0.659109	0.128089	-0.646884	0.056759	-0.198425	-0.567451	1.24127	-0.923699	-1.093	0.36882	-0.909533	1.19021	0.734455	0.512765	-0.096921	-1.25482	-0.653546	0.231329	-0.916979	0.909448	0.46381	-0.37437	-0.401955	-0.514135	0.410017	0.263893	0.18999	0.014962	-0.4221	0.305489	-0.71775
frg_1318	1.04336	0.155256	0.033405	-0.387391	-0.425322	0.896066	-0.579903	0.241679	-0.122997	-0.644436	-0.541795	-0.466956	0.911667	-0.484344	-0.033471	0.262962	-0.363582	0.227506	0.16219	-0.150948	0.494012	0.092244	-0.721019	0.2455	0.495744	-0.269744	-0.468788	-0.431808	-0.706568	0.069617	0.292524	0.441853	-0.180149	0.199455	-0.50099	0.708785	-1.25737	0.305797	-0.716841	0.243957	-0.29718	0.408316	-0.312602	0.203282	0.700665	0.124812	0.129312	0.090657	-0.705025
frg_1177	1.04028	-0.146593	1.11291	0.401682	-0.006139	-0.596429	-0.125634	0.184715	-0.218337	-0.090884	-0.02263	-0.202476	1.19	-0.175332	-0.007317	-0.466386	-1.08952	-0.983252	-0.367979	-0.074576	-0.905987	-0.410181	0.615015	-1.16041	0.410375	-0.269263	-1.32677	0.432532	-0.285594	0.87173	0.626026	0.692551	-0.348889	-1.11932	-0.27259	-0.05958	-0.676254	0.792042	0.721561	0.140686	-0.460203	-0.812106	0.229038	0.032573	-0.286979	-0.00189	-0.890635	0.185045	-0.338666
frg_459	0.992046	0.213561	1.09952	0.299511	-0.200888	0.394542	-0.386418	0.881446	0.221807	0.226721	0.187232	-0.158472	0.667073	-0.485027	0.586854	-0.675243	-0.103624	-1.40254	0.755729	0.240456	-0.945879	-0.776623	0.879855	0.088121	0.154169	-0.886222	-1.11653	-0.47967	-0.626124	-0.420651	0.98635	0.067502	-0.085015	-1.07597	-0.662644	-0.629108	0.223442	0.296029	0.094507	-0.982819	-0.214589	-0.04736	-0.41178	0.123862	0.428531	0.03124	-0.766658	0.379775	-0.325176
frg_295	0.381755	0.668949	0.115309	-0.785589	-0.517433	0.419133	-0.483137	-0.901196	0.514359	-0.12518	-0.543399	0.413979	0.338036	0.133743	-0.023454	-0.686025	-0.622292	-0.123066	-0.364166	0.022504	-0.780332	-0.337584	0.081991	-0.249204	-0.840756	0.347363	0.09095	-0.711183	-0.643004	0.541042	0.408596	0.263884	0.164587	-0.205203	-0.076905	-0.379908	-0.629246	-0.244523	-0.203993	-0.00281	0.319943	0.043264	-0.299503	-0.439487	-0.073441	0.198205	-0.296332	-1.10329	-0.035653
frg_1751	0.935522	0.063824	0.225532	-0.030302	0.578414	0.202506	-0.569852	0.661282	-0.016713	-0.716941	-0.157879	0.322256	1.04357	0.53428	0.446529	-0.986111	-0.827267	-0.983782	-0.433353	0.242521	-1.20542	-0.305077	-0.237335	-0.205689	-0.459162	-0.124256	-0.239421	-0.328783	0.171141	-1.17916	0.429495	-0.131776	-0.22726	0.515985	0.529598	-0.225492	-0.142974	0.399083	-0.514875	0.188931	-0.563002	-0.527327	-0.362416	-0.17868	0.39751	-0.299827	0.048154	-0.069203	-0.793656
frg_84	0.409492	-0.122881	0.372565	0.112892	-0.597111	0.024837	-0.378992	-0.219622	0.176701	-0.077917	-0.291238	0.246796	0.24596	0.024101	0.300203	-0.074424	-0.78662	-0.022381	-0.637074	-1.06856	-0.859281	-0.681196	1.1624	-0.338611	-0.085757	0.149227	-0.720563	-0.059026	-0.406321	0.653541	0.720601	-0.460738	0.000401	-0.717856	0.254986	-1.00962	-0.526001	-0.307904	-0.377388	-0.19444	0.401446	-0.205053	0.336722	0.592162	0.191285	-0.176544	-0.790773	0.629083	0.056184
frg_578	1.01027	-0.323789	0.900909	-0.766407	0.806479	0.41632	-0.916647	0.19483	0.302425	-0.433634	0.310407	-0.178283	-0.710147	0.20785	-0.566534	-0.194717	-0.619272	-0.277395	-0.196009	-0.804357	-0.528443	-1.04493	0.239215	0.042894	0.112767	-0.422896	0.128644	-0.459981	0.375711	-0.023537	0.874994	0.887314	0.147791	0.128393	0.761807	0.355219	-0.336779	-0.365096	0.447663	-0.877327	-0.157658	-0.284938	-0.293843	0.967832	0.064926	0.091604	0.488073	0.41212	0.151729
frg_1317	0.63262	0.035334	1.17942	-0.049866	0.557716	0.407091	0.237763	1.63062	-0.142791	0.275411	-0.156686	-0.739969	-0.892092	-0.048281	1.18671	-0.724407	-0.394016	-0.229989	0.598177	0.101358	-0.735251	-0.123547	0.186688	0.54212	-0.272644	-0.673683	-0.380742	1.02188	0.286356	-0.33106	-0.282375	-0.040742	-0.21818	0.134929	0.454236	-0.023278	0.997236	0.70124	0.707057	0.530069	-0.335024	-0.515062	-0.130652	0.678847	0.099729	0.051712	0.701434	-0.267823	0.194684
frg_395	0.012693	0.255869	-0.613472	-0.838455	-0.44518	1.09787	-0.672104	-0.11839	0.302548	-0.580378	-0.777839	-0.780523	0.177122	-0.06196	0.141127	-0.279759	-0.204599	0.207	0.038053	-0.275752	1.15304	-0.213497	-0.251401	0.251124	1.17729	0.579312	-0.228253	0.712766	-0.163856	0.316437	-0.134212	0.367209	0.372636	-0.591529	-0.248664	-0.628223	-0.742105	-0.282955	-0.533727	-0.386877	-0.501286	-0.489963	0.549063	0.755219	0.26378	0.010581	-0.70615	0.024302	-0.477612
frg_1349	0.629439	-0.652081	-0.16976	0.380882	0.420488	-0.807984	0.431945	0.011312	-0.402557	0.217028	-0.678114	-1.04327	0.834255	-0.348067	-0.126566	0.132886	-0.51639	-1.01935	0.06789	0.328486	0.10509	0.544551	-0.374789	-0.765553	0.644533	0.342689	-0.754438	0.445459	-0.681402	0.714319	1.2204	0.224051	-0.06841	-0.842376	-0.44669	0.284975	-1.73707	1.08488	0.323197	-0.17173	-0.595745	0.232925	0.657162	1.01649	0.476803	0.200885	-0.680325	1.34357	-0.506353
frg_615	0.8708	-0.345898	0.810415	-0.286909	-1.24275	0.698152	-1.18455	0.137528	0.178429	0.168909	-0.47344	0.404122	0.197032	-0.803353	-0.501371	0.348365	-0.235259	-1.32685	-0.172846	-0.545721	-0.599878	-0.965384	0.369027	0.108757	0.764926	-0.236112	-0.837036	-0.660106	-0.799587	0.577526	0.666707	0.122572	-0.041674	-0.12166	0.069466	0.107953	-1.71295	-0.942936	-0.059399	-0.0744	-0.199466	0.324184	-0.47387	-0.278841	0.626934	-0.125521	-0.64269	0.807899	0.227636
frg_363	0.183535	0.695064	-0.636408	-0.369214	-0.646137	-0.046335	0.065651	0.168653	0.614808	-0.354324	-0.207406	-0.055393	0.085647	0.381637	0.02368	-0.221881	0.515697	0.983197	-0.465296	-0.803896	-0.271517	-0.439789	0.580691	-0.158548	0.237568	0.077231	0.312261	0.40377	-0.346493	0.445632	-0.195844	-0.502433	0.722863	-0.677884	-0.234453	-0.263208	-0.466945	0.074404	-0.255143	-0.091023	0.077972	0.778334	-0.276542	-0.009178	-0.00092	0.373261	-0.367288	-0.350509	0.418305
frg_1201	0.280851	0.181047	-0.323027	0.180477	0.426989	0.552608	0.106367	0.498692	-0.558323	0.081051	-0.816491	-0.481387	-0.221081	-0.341715	0.342576	-0.529088	0.071569	-0.44195	0.213258	-0.626465	-0.298409	0.36205	0.267282	-0.565572	0.07061	-0.190463	-0.357625	0.912553	-0.759502	0.410371	0.854233	-0.671708	-0.911321	-1.27809	-0.665305	-0.162023	-0.401628	0.940595	0.320533	0.012002	-0.985742	-0.220357	-0.173316	0.283906	0.07275	-0.031237	-0.892922	0.817129	-0.594914
frg_434	0.56866	0.616363	0.143524	0.152423	0.477298	-0.362764	-0.064788	-1.11569	-0.39564	0.123961	-0.138451	0.410075	0.404974	0.29708	0.053201	-0.336284	0.030286	-0.631285	-1.37769	-0.550705	-0.727582	-0.470244	0.151229	-0.171387	-0.589406	0.194501	0.426223	-0.041408	-0.542906	1.45114	1.1894	-0.768478	0.678147	-0.450659	0.03257	-0.496623	-0.905944	-0.728615	-0.13705	0.4035	0.623268	0.400825	-0.019093	0.573988	0.081519	-0.05808	0.003044	0.967225	1.36471
frg_1594	0.357658	0.099848	1.2863	0.142144	-0.5604	1.04931	-0.27413	0.472029	0.585462	0.476683	0.087211	-0.001698	0.502533	1.02922	-0.431253	-0.94722	-0.471786	-1.21373	-0.143228	-1.02299	-1.5298	-0.833476	0.151891	0.222151	-0.24487	-0.885652	0.229364	0.234671	-0.5038	0.200161	0.908576	-0.661922	1.0503	0.577041	0.833279	0.917424	-0.333755	-0.487634	0.201822	0.208693	-0.656382	-0.667194	0.04331	0.70072	0.747785	1.18941	-0.419731	0.17151	0.359924
frg_137	0.57898	0.128079	0.199143	-0.111785	-0.093926	0.336445	-0.459543	-0.615827	0.253077	-0.503854	0.348535	0.24645	0.232822	-0.129126	0.307353	0.021822	-0.248577	-0.152713	-0.113775	-0.422072	0.09429	-0.580224	0.337937	-0.253776	-0.424395	0.164407	0.235667	-0.059837	0.046075	0.121379	0.467949	-0.287149	0.142621	-0.238735	-0.005369	-0.094908	-0.714699	-0.164407	0.370116	0.266568	0.119411	0.284243	0.077063	0.05525	-0.240189	0.266866	-0.130332	0.185238	-0.433397
frg_712	0.182283	0.861725	-0.180129	-1.157	-0.056869	0.11065	-0.343333	0.030387	0.173628	-0.794203	-0.194503	-0.218045	-0.969128	-0.728877	0.259451	-0.70414	-0.123735	0.153234	-0.005061	0.120712	-0.321292	-0.600627	0.047232	-1.03715	-0.251029	0.732324	-0.658536	0.336254	-0.718625	0.641179	0.514376	0.428043	-0.073062	-1.28324	-0.158345	-0.804903	-0.195609	0.402911	-0.125742	-0.433624	0.499496	-0.648528	0.191948	0.465197	-0.163209	-0.228574	-0.898576	-0.010787	-0.122908
frg_877	0.36508	0.434684	1.2004	0.581484	-0.468753	0.018146	0.222264	-0.349001	0.580212	0.161284	0.037207	-0.223467	0.29652	0.951181	0.451722	-0.445033	-0.672351	-0.733929	-0.322033	-0.731821	-0.888306	-0.482778	0.769054	-0.219238	0.167844	-0.227766	-0.743525	-0.058525	-0.85201	0.748416	0.439284	0.263524	0.546156	-0.497479	0.391469	0.159813	-0.76392	0.269354	0.1308	-0.354926	-0.10493	-0.20403	0.196528	0.975211	0.421307	0.283227	0.181041	0.012987	0.2487
frg_1183	0.643035	0.139006	-0.356657	-0.739286	0.38592	0.967279	-0.283541	0.54792	0.318957	-0.668208	-0.094699	-0.251695	-0.259214	0.286313	-0.053167	-0.161114	0.165209	0.244848	-0.384815	-0.676366	0.1598	-0.140108	-0.415085	0.251472	1.12928	-0.256462	-0.868008	0.125047	-0.449453	-0.430532	0.206739	-0.006775	0.328612	-0.391596	-0.035903	0.153792	-0.419999	-0.322987	-0.251127	-0.926724	0.08138	-0.308757	-0.624349	0.415194	0.338094	0.469325	0.135564	0.314645	0.46931
frg_176	0.821392	0.212446	-0.591883	-0.238496	-0.05658	0.778406	-0.017811	0.981074	-0.230982	0.372565	-0.6324	-0.202529	0.455469	0.809437	0.678902	0.628609	-1.35574	0.184255	-0.663804	0.272193	0.25384	-0.404156	-0.271826	-0.345837	-0.257357	-0.863861	-0.094029	-0.712702	-0.629553	0.565218	-0.332247	0.570526	-0.513877	-0.531892	-0.377401	-0.027475	0.034053	0.594245	-0.35137	-0.279023	0.772305	-0.079058	0.009911	0.288414	0.190714	-0.336247	-0.317629	0.118697	-0.642583
frg_604	0.306338	0.741204	-0.620368	-0.230287	0.004095	0.695829	-0.730116	0.033489	-0.572922	-0.443996	-0.662845	-0.202741	-0.534046	-0.321799	-0.571018	-0.217941	-0.101457	0.326457	-0.074202	-0.843858	-0.192722	-0.331561	-0.460927	-0.430959	-0.298187	0.407927	-0.033596	0.13573	-0.581968	-0.4213	0.696481	-0.413948	-0.172135	-1.45823	-0.406179	-0.664111	-0.497383	0.522286	0.58467	-0.375461	0.242194	-0.044558	0.248327	0.072815	0.191306	0.030538	-0.18185	0.749158	-0.027591
frg_384	0.67534	0.239384	-0.297623	1.13726	0.143429	-0.811258	-0.344963	-0.036142	-0.0104	-0.36988	0.04206	-0.222954	0.695787	0.006495	0.906812	-0.70948	-0.616983	-0.277146	-0.574369	0.071012	-0.974405	-0.455749	-0.401662	-0.538053	-0.370842	-0.181205	0.781827	0.037627	0.1258	0.327321	0.288208	-0.492441	0.440667	0.743896	-0.054593	0.387663	0.021657	0.040821	-0.508091	0.675939	-0.343446	-0.244645	-0.094701	0.231536	0.506597	0.44189	0.3248	-0.011745	-0.351021
frg_605	0.250188	0.550286	-0.38669	-0.146778	-0.21924	0.507402	-0.128492	0.356677	-0.108451	-0.482505	-0.321345	-0.476809	-0.574159	-0.682457	0.191645	-0.876485	-0.129131	0.048127	0.597502	-0.403251	0.089059	-0.034393	0.187226	0.083448	-0.257519	0.409008	-0.126074	0.881001	-0.494729	-0.428768	0.262322	-0.684699	-0.50552	-1.2783	-0.275211	-0.53586	-0.230244	0.277719	0.264044	-0.032077	-0.210324	-0.135203	-0.084134	0.010403	0.121806	0.457031	-0.786449	0.122024	-0.255782
frg_462	0.583912	0.468535	-0.129755	-0.120458	-0.295824	0.203658	0.358367	-0.531441	-0.711712	-0.048707	-0.476099	0.442785	0.93696	0.463947	-0.751818	-0.581898	0.592485	0.005068	-0.475888	-0.2322	0.197712	-0.504305	0.60351	-0.637894	0.079196	-0.679084	0.194379	0.085789	-1.27434	0.811187	-0.101464	-0.355545	0.051083	-0.757405	-0.277085	-0.147652	-0.836125	-0.437811	0.091574	-0.047021	-0.119326	0.912801	0.324419	-0.410202	0.172464	0.582501	-0.510817	0.045619	0.147351
frg_1127	1.32971	0.036991	0.120074	0.499008	0.954143	-0.162444	0.865289	-0.24712	0.048544	-0.50453	-0.252278	-0.699026	0.338937	-0.076591	0.133316	-0.214477	-1.11087	-0.820238	0.288178	0.423618	-0.196973	0.546552	-0.212545	-0.829684	0.270236	0.070869	-0.664578	0.271356	-1.12437	0.432564	1.48363	0.497531	0.063657	-1.50646	0.325109	0.667892	-1.79499	0.953059	0.08094	-0.717105	-0.886825	-0.208761	0.665973	0.625341	0.055853	-0.442402	-0.190109	1.28129	-0.457569
frg_1457	0.851248	-0.360263	0.185965	-0.081811	-0.054736	0.546607	-0.696682	-0.422881	0.024563	-0.85354	0.323405	0.31588	0.689526	0.368963	-0.543096	-1.70054	-0.067711	-0.455861	0.047263	0.180967	-0.566294	-1.40841	-0.591016	-0.609886	0.450126	-0.844236	0.540814	-0.459605	-0.984035	-0.399361	0.46817	-0.315996	0.059309	-1.43738	0.254419	0.452197	-0.860589	0.240526	-0.497893	-0.050963	-0.225303	0.221029	0.059099	-0.437448	0.359467	0.198934	-0.863465	0.94714	-0.330465
frg_1305	0.756101	0.173948	-0.655985	-0.865843	0.477655	0.631888	-0.248391	0.660827	-0.032534	-0.505761	-0.30148	0.230542	0.127302	-0.51746	-0.370271	-0.650087	0.334965	-0.081528	0.409969	-0.685306	0.388424	0.220094	-0.195287	-0.702817	0.012464	-0.43319	-0.236978	0.244112	-0.779864	-0.121247	0.73718	-0.45161	-0.292245	-1.25373	-0.479823	-0.676906	-0.28686	0.351799	-0.312052	-0.207187	-0.269475	-0.49145	-0.190208	-0.238547	-0.142134	-0.014237	-0.501885	0.706121	0.051677
frg_1258	0.395231	-0.182311	-0.064488	-0.066615	0.69451	-0.035752	-0.57852	0.398082	0.362998	-0.591999	0.135984	0.346387	0.069148	0.492595	0.44333	-1.15588	-0.928412	-1.00443	-0.989884	0.24712	-1.53021	-0.799744	-0.542196	0.054198	-0.25265	-0.535278	0.410387	-0.217223	0.157263	-0.767203	0.297106	-0.322469	0.465578	0.354669	0.154544	0.053624	-0.09991	0.327423	-0.230241	-0.116292	-0.206276	-0.716387	0.153972	0.040501	0.527804	-0.16166	0.387796	-0.17898	-0.755948
frg_1347	0.648098	0.596353	0.607562	-0.077747	0.047491	0.362288	-0.002097	0.574574	-0.395409	0.210615	-0.533449	-0.803771	-1.3045	-0.433961	0.26541	-0.266515	-0.639911	-0.229655	0.25709	-0.317967	-0.239437	0.301834	-0.478932	-0.863467	-0.082563	0.582697	-0.867397	-0.044075	0.250166	0.574697	0.904677	0.20277	-0.440921	-0.85636	0.043969	0.20863	-0.393489	0.551236	1.20658	-0.600762	-0.389106	-0.187353	-0.399154	0.363801	-0.098181	0.333827	-0.069162	-0.10067	-0.469282
frg_85	0.148446	0.175782	0.351297	-0.028533	-0.739891	0.192898	-0.352328	0.023006	0.193878	-0.297008	-0.087435	0.143428	0.312858	0.119592	-0.041561	-0.167035	-0.157813	-0.619395	-0.330741	-0.66953	-0.671721	-0.45994	1.32396	-0.413334	-0.362582	0.164786	-0.678992	-0.278186	-0.362021	0.747132	0.350617	-0.49127	0.368613	-0.611137	0.280206	-0.596335	-0.271024	0.051716	0.041948	-0.113014	0.037807	0.155751	0.565175	0.295423	-0.385244	-0.379277	-0.965091	0.053738	0.264679
frg_653	0.367745	0.18179	1.48172	0.163846	-0.529152	0.009363	-0.143505	-0.618537	0.168409	0.016029	0.231229	-0.082128	1.44718	-0.204378	-1.07714	-0.012444	-0.089529	-1.30867	-0.891641	-0.959289	-0.887934	-0.357891	0.798683	-0.664683	0.254224	-0.358667	-0.190893	-0.482439	-0.189477	1.14739	0.817507	-0.594886	0.65405	-0.334639	0.540268	-0.532102	-1.13537	-0.530817	-0.420142	0.070694	0.485051	0.707368	0.323354	0.551218	-0.037706	-0.095332	-0.769676	0.50165	0.988966
frg_1195	0.630769	0.216864	0.671148	0.103244	-0.020094	0.573532	-0.076857	0.670341	0.263748	-0.132207	-0.036742	-0.374619	1.10214	0.217558	0.418269	-0.437666	-0.122447	-0.161337	-0.335224	-0.165402	-0.504803	0.930925	0.00166	-0.392209	0.878038	0.427897	-0.453766	0.352077	-0.392629	-0.270246	-0.146078	-0.036467	-0.019834	0.419587	0.176335	0.002746	-0.607996	-0.159004	-0.313159	0.009242	0.088526	0.238882	-0.545461	0.00971	-0.203552	-0.021126	0.309036	-1.02474	0.219271
frg_1237	0.321712	0.913704	-0.983019	-0.39256	0.445044	0.463114	0.477913	-0.122847	-0.667219	-0.463516	-0.787911	-0.635736	-0.081845	-0.078691	-0.144852	0.171751	-0.041148	0.214555	-0.164819	-0.30565	0.435295	0.395647	-0.242176	-0.492151	0.008652	0.43643	-0.292041	0.727666	-0.786228	0.179506	-0.061488	-0.331916	-0.48024	-0.950432	-0.540462	-0.270319	-0.352609	0.68986	0.364888	-0.167102	-0.432743	-0.454017	-0.196858	0.341332	0.046758	0.529134	-0.53028	0.106787	0.071924
frg_393	0.478053	-0.140722	-0.157647	0.24528	0.56875	-0.08659	-0.443459	0.322995	0.191627	-0.749846	-0.087883	-0.178176	0.467615	-0.424368	0.634467	-0.331933	-0.11714	-0.293898	-0.527033	0.813661	-0.006297	0.132328	-0.282492	-0.377602	0.195994	0.104389	0.261602	-0.054047	-0.697625	0.558243	0.179188	0.173494	0.457439	-0.394728	-0.079894	-0.200803	-0.63145	0.427924	-0.107338	-0.068621	-0.572186	0.084145	-0.192213	-0.038764	0.061649	-0.6498	-0.275387	-0.220296	0.108287
frg_523	1.34029	0.361115	0.353583	0.227062	-0.15884	0.746815	-1.1454	-0.083964	0.015453	-0.316358	0.590783	-0.249739	0.0928	0.028511	0.424834	-1.39661	-0.817126	-0.737547	-0.026771	0.123845	-0.463474	-1.48181	-0.039141	0.024244	0.565904	0.109116	-0.392911	-0.670723	-0.642323	-0.030498	0.910381	0.714187	0.776721	-0.496683	0.774166	-0.083806	0.220032	0.138045	-0.110233	-0.645864	0.231957	-0.325219	-0.026073	0.132201	1.1632	-0.65777	0.023374	0.732164	0.031254
frg_362	0.689438	-0.326543	0.234727	0.318218	0.587187	-0.089176	-0.568802	-0.102666	-0.313771	0.197962	0.553806	-0.242553	0.07639	0.347383	0.247654	-0.065167	-1.16217	-0.948924	-0.2238	0.089295	-0.668959	-0.824976	-0.38008	-0.006862	0.292244	-0.149566	0.10028	-0.33716	-0.666579	0.513589	0.114759	0.077966	0.015344	0.288181	-0.328916	0.462851	-0.706917	0.094034	0.769019	-0.343839	-0.014755	-0.162226	-0.33418	0.05082	-0.022122	0.49414	0.110121	0.366756	-0.027537
frg_758	0.419838	0.069317	-0.039818	-0.11498	0.327467	-0.678224	0.173632	-0.126219	0.081207	0.043959	0.319664	-0.483738	0.278092	0.250853	0.201489	-0.456195	-0.052125	-0.383595	-0.006497	0.256316	-0.212696	-0.250306	0.438212	-0.255836	0.03047	-0.488296	0.079107	-0.215281	-0.145121	-0.180597	0.531506	-0.157223	0.696724	-0.763899	-0.472987	-0.412469	-0.630995	0.140979	0.438211	-0.022177	-0.713039	-0.176816	0.458128	-0.465267	-0.573082	-0.582105	-0.593359	-0.353914	-0.084887
frg_417	0.933628	-0.023463	-0.559281	-0.898778	0.155309	0.764617	0.620962	-0.379372	-0.806728	-0.54091	0.29265	-1.31806	0.339424	1.18543	-0.003525	0.15009	-0.644171	-0.023816	-0.823746	0.064701	0.781687	0.357918	-0.413952	0.053502	1.0633	0.113309	-0.671775	0.10407	-0.309424	0.95345	0.489111	0.512877	-0.268792	-0.397455	-0.091561	0.598003	-0.162571	-0.015042	-0.839266	-0.00631	-0.360959	-0.348896	-0.437814	0.756073	-0.139781	0.248888	0.490088	0.125148	-0.496018
frg_682	1.27419	-0.296719	0.773386	0.683875	0.089609	-0.648258	0.32796	-0.033443	-0.079071	0.230512	0.037712	-0.625846	0.756483	-0.285672	-0.625217	0.277764	-0.854447	-1.39252	-0.507311	0.188865	-0.751243	0.178199	-0.234658	-0.456699	0.356895	-0.797696	-0.924394	0.586096	-0.564561	0.814573	0.778688	0.671227	0.115869	-1.19422	-0.87909	-0.035144	-0.648871	0.809058	0.617742	-0.417916	-0.404573	-0.159105	0.983661	0.174886	-0.482002	-0.077111	-0.075359	0.464547	-0.493131
frg_1254	1.00227	-0.60987	0.183024	0.061687	0.284249	0.565048	-0.488679	0.73452	-0.212125	-0.666789	-0.772889	-0.465835	0.644908	0.019027	0.923364	0.296666	-0.656566	-0.238215	-0.338152	0.624509	-0.196177	-0.019045	-0.469794	0.28485	0.397082	0.166642	-0.576765	0.229031	-0.642816	-0.01857	0.093954	0.305079	-0.687146	-0.069566	-0.175974	-0.074665	-0.631993	0.782893	-0.044984	0.057263	-0.082391	-0.026991	-0.289677	-0.232155	0.029333	0.318564	-0.124249	-0.434037	-0.042507
frg_337	-0.559435	0.801223	-0.295393	-0.32811	0.129194	0.103242	-0.442469	0.183599	0.054322	-0.231844	-0.275027	-0.169657	-0.548066	-0.55965	0.046392	-0.52661	0.264259	-0.022013	0.287317	-0.745154	-0.036254	-0.268116	0.093376	-0.592133	-0.357305	0.297257	-0.30922	0.237012	-0.272076	-0.749116	0.140084	-0.396356	0.052968	-1.45997	-0.249284	-0.842362	-0.295324	0.243467	-0.108548	-0.222532	0.092123	-0.072395	-0.064567	-0.036033	-0.177058	0.164557	-0.735374	-0.253978	0.023284
frg_478	0.69741	0.25362	0.244374	-0.229988	-0.406639	-1.00284	0.117409	-0.021966	-0.09867	-0.41968	0.207762	-0.435285	0.616261	0.255427	-0.503726	-0.193925	-0.523717	-0.078128	-0.229259	-0.652218	-0.332187	-0.658712	-0.142855	-0.736087	-0.048653	-0.65382	0.512715	-0.180322	-0.965478	0.155984	0.584913	0.647197	0.202814	0.017898	-0.892652	0.005549	-0.859339	-0.504209	1.15301	-0.194477	0.213146	0.286502	-0.090765	-0.481412	0.138454	-0.170625	-0.605025	0.257581	0.325907
frg_793	0.151578	0.021977	-0.194821	-0.218794	0.646754	0.433217	-0.188544	-0.162252	0.294004	-0.625234	-0.216955	-0.083519	-0.235069	-0.202124	-0.431106	-0.418657	-0.010833	0.055916	-0.101276	-0.761825	-0.256461	0.32553	0.430527	-0.543329	-0.295302	-0.049172	0.634485	0.142433	-0.535108	0.302591	0.797177	-0.440272	0.032321	-1.33977	0.230448	-0.517175	-0.466901	-0.154935	0.497041	-0.299347	-0.393285	-0.131671	0.338767	0.311021	0.006861	-0.109665	-0.596903	0.897237	0.176027
frg_1777	0.668528	-0.087212	0.499705	-0.115402	0.085267	0.581529	-0.893349	-0.622289	0.348334	0.933886	-0.314271	1.033	0.31683	-0.523601	0.436148	0.6506	-0.83305	-0.353694	-0.296353	-0.061826	-0.372751	-0.910752	0.204179	-0.334045	-0.821063	-0.92769	0.338926	-0.716876	-0.316078	-0.168157	-0.443742	-0.464544	0.558263	0.673905	0.265895	0.623305	-0.724093	-0.038633	-0.903566	0.327209	0.432222	-0.230567	0.123819	-0.537021	0.415375	-0.392351	0.538054	0.54864	-1.03845
frg_839	0.34878	0.640045	0.222061	-0.040323	-0.587744	0.683394	-0.642567	0.110248	-0.137477	-0.171347	-0.726631	0.042528	-0.291548	-0.533614	0.423809	-1.0941	0.068775	-0.933678	0.587633	-0.793878	-0.459377	0.082865	0.388894	-0.752513	0.097997	0.391109	-0.503528	0.557685	-0.450222	-0.269076	0.677534	-0.745088	-0.540564	-1.04484	-0.151487	-0.471534	-1.09784	0.293636	0.771873	0.05036	-0.369289	-0.014236	-0.150716	0.103748	-0.031706	-0.201328	-0.986768	0.978299	-0.159562
frg_1727	0.435911	-0.422544	0.833653	-0.042191	0.613887	0.149153	-0.246895	0.447819	-0.199386	-0.755209	0.307514	-0.352985	0.154339	0.123699	0.240631	-0.051708	-0.360577	-0.487907	-0.133966	-0.505241	-0.711938	0.161613	-1.13809	-0.263149	0.251654	-0.34844	-0.102524	-0.682598	0.34007	0.431068	0.475121	0.184969	-0.197493	0.077401	-0.209746	-0.063521	-0.071508	0.26795	0.513267	-0.955427	0.093278	-0.713136	-0.124667	0.619006	0.314981	0.327734	0.107108	0.60638	0.584869
frg_379	0.053697	0.416352	-0.274385	-0.324637	-1.04514	-0.296421	-0.327719	-0.443323	0.1005	-0.05128	-0.383076	0.167643	0.041403	-0.143153	0.423702	0.215084	0.121451	0.097949	-0.893072	-0.761279	-0.227851	-0.736251	0.203205	-0.314074	-0.305248	-0.177567	-0.122038	0.072765	-0.038493	0.322329	-0.606506	-0.372339	0.631689	-0.619691	-0.175627	-0.515304	-0.682157	-0.791104	-0.795208	-0.349186	0.32814	0.418748	-0.455525	0.569277	0.309813	-0.195496	-0.249577	-0.507101	0.320291
frg_2031	-0.233965	0.018345	0.062975	-0.08823	0.345607	0.24682	0.044604	-0.407216	0.396385	1.1514	-0.477183	0.990372	-0.315163	-0.007346	0.637187	0.471751	-0.32231	0.080159	-0.228953	-0.181583	-1.27048	-0.627486	1.34812	0.645712	-0.105617	-0.528313	0.762774	0.435288	-0.31955	-0.400133	-0.593572	-0.463278	0.565411	0.486215	0.406558	-0.353101	-0.502262	0.085143	0.486193	-0.147467	-0.083032	-0.559035	-0.213961	0.013582	0.494449	-0.269578	0.48517	0.482247	0.376877
frg_506	0.576676	0.273135	0.088103	-1.2566	-0.541354	0.555542	-0.547246	-1.01965	1.03857	-0.451521	-0.571175	0.786727	0.270172	-0.561575	0.05427	-1.22748	-0.5412	-0.497388	-0.247429	-0.166999	-0.055692	-0.716871	0.182641	-0.036492	-0.757821	0.246938	-0.382162	-0.581541	-0.839748	0.364434	0.590437	0.032017	-0.151873	-0.698006	-0.215315	-1.05834	-0.35591	-0.191789	-0.185323	-0.072942	-0.462942	-0.418253	0.029303	-0.365644	-0.384122	0.42799	-0.578463	-0.928623	-0.174866
frg_753	0.207248	0.384908	0.121773	-0.061074	0.342789	0.630462	0.079927	0.440333	-0.350219	-0.145389	-1.10491	-0.621034	-0.288011	-0.310672	0.018237	0.218661	-0.0245	-0.250629	0.506537	-0.536943	-0.064115	0.445492	0.295264	-0.331126	-0.028544	0.283915	-0.552608	0.707817	-0.318721	-0.744731	0.521897	-0.186071	-0.472052	-1.37208	-0.229083	-0.5897	-0.194885	0.717508	0.400384	-0.422752	-0.157865	-0.33806	0.252245	0.138486	-0.081003	0.017642	-0.189075	0.570427	-0.178146
frg_747	0.26108	-0.348301	0.405006	0.923089	-0.040877	0.404977	-0.693549	0.203824	0.425531	-0.145896	-0.845914	0.398889	-0.266606	0.149891	0.562785	-0.249585	-0.319227	-0.319811	-0.50114	-0.267463	-1.44298	-0.646658	-0.336432	-0.170651	-0.402633	-0.467969	0.265186	0.495848	-0.167255	-0.410936	-1.00597	-0.618722	0.458359	0.333625	0.239499	0.610404	-0.764761	0.245049	-0.210654	-0.022788	-0.063261	-0.51342	0.200436	0.198385	0.283204	0.78076	1.24116	0.03668	-0.386396
frg_889	0.453465	0.465309	0.924495	0.284671	0.420634	-0.095028	-0.509718	0.614071	-0.247932	-0.16523	-0.374238	-0.990731	0.147155	-1.03238	1.01294	0.141217	-0.61939	-1.17652	0.418173	-0.036405	-0.687998	-0.710966	-0.707781	-0.444746	0.579799	-0.31655	-0.384296	0.36512	0.133364	0.015362	0.532518	0.320432	-0.537893	-1.04208	-0.147833	0.932581	-0.348377	0.101563	0.435738	-1.59549	-0.174121	-0.228796	0.109717	0.431078	0.747982	0.188606	-0.393644	0.757084	-0.451635
frg_736	0.574388	0.426735	0.031493	0.109007	0.69981	0.364008	0.583531	0.158371	-0.092645	0.064864	-1.0004	-0.599535	0.012007	-0.189992	-0.492349	-0.247342	0.170811	-0.544965	0.164929	-0.378724	0.260431	0.690501	0.215601	-0.492434	-0.063711	-0.515001	0.293703	0.566862	-0.48174	-0.342461	0.696395	-0.338618	-0.081901	-1.76202	-0.214551	-0.08413	-0.38288	0.683088	0.823048	-0.435776	-0.416054	-0.115825	0.407546	-0.532159	-0.050159	-0.138275	-0.495691	0.461661	-0.387304
frg_460	0.93871	0.172754	1.125	0.232645	-0.24949	0.650859	-1.31517	0.07279	-0.061123	0.072767	0.432508	0.277803	0.185533	0.15046	0.257885	0.118066	-1.01863	-1.35943	-0.319189	0.136818	-1.04072	-0.598323	-0.013296	0.635255	0.407291	-0.159525	-0.865065	-1.07307	0.121725	0.466364	0.584548	-0.00908	-0.147164	-0.21935	-0.416579	0.297989	0.175842	-0.267818	0.092071	-0.357671	1.02444	0.502942	-0.430002	0.069461	0.522396	0.17607	0.000155	-0.202387	-0.496621
frg_754	0.236172	-0.159181	0.421881	-0.853835	0.683446	0.20155	-0.626087	0.063417	0.124792	-0.615621	0.345964	0.009073	0.503857	0.508695	-0.171244	-0.538204	-0.654245	-0.555875	0.498371	0.138348	0.028837	0.040012	-0.097853	-0.39812	0.771994	-0.196541	0.010209	0.091273	-0.157251	-0.306794	0.209615	-0.148183	0.51735	-0.145482	-0.815808	-0.857426	-0.394976	-0.162536	-0.476504	-0.171469	-0.750768	-0.458478	-0.119498	-0.455873	0.024644	-0.550521	-0.604959	-0.588535	-0.445716
frg_1176	0.099577	-0.655086	0.202109	-0.375989	0.340478	-0.087259	-0.090964	-0.602333	0.399613	-1.64384	0.534618	-0.245838	-0.947616	0.044377	0.395298	-1.39512	-0.418869	-0.29568	-1.27044	0.30031	-1.1661	-1.88926	-0.52504	-0.952408	-0.220911	-1.34603	0.938659	-0.773944	-0.285439	-0.910873	0.031265	0.484131	-0.08632	-0.418104	0.063281	0.647772	-0.198648	-0.410243	0.065994	-0.009507	0.412532	-0.77109	-0.104601	0.224496	1.04809	0.725542	0.768758	-0.005224	0.219956
frg_776	-0.006008	-0.093793	0.133173	-0.012616	-0.075128	0.11103	-1.03547	-0.048712	0.96851	0.094489	-0.814964	0.08861	-0.118923	-0.190175	1.70645	0.033228	-0.518504	0.055369	-0.845357	-0.339902	-0.401484	-1.30038	0.132643	-0.239532	-0.181507	-0.920214	0.554207	0.103921	0.003487	-0.28858	-0.495368	-0.313606	1.07582	0.530755	0.054325	-0.256583	-0.387347	-0.42359	-0.12792	-0.790998	0.033137	-0.507732	-0.025325	-0.052066	0.653622	0.412117	1.11949	-0.31804	-0.13322
frg_426	0.048592	0.589039	-0.80476	-0.434238	0.143138	0.879152	-0.578533	-0.308924	-0.204072	-0.334211	-0.29391	-0.503372	0.04599	-0.025417	0.231686	1.08649	-0.914644	0.562963	-1.5974	-0.327523	-0.206601	-0.806751	-0.662673	0.243073	0.801964	0.783229	-1.0774	-0.391941	-0.390042	-0.421672	-0.167509	-0.108768	0.783656	0.262858	0.54762	0.401491	-0.987682	0.321805	-0.232493	-0.180653	0.214174	0.463745	0.000598	-0.57615	0.78486	-0.204292	0.553201	-0.890167	1.01334
frg_1486	0.449256	-0.435898	0.066347	0.407023	0.497174	0.020362	-0.606658	-0.181624	0.519227	-0.641944	-0.320518	-0.655322	0.198936	-1.1797	-0.456285	0.203102	-1.19319	-0.802979	0.62409	-0.700046	-0.669217	0.340133	-1.24617	-0.093719	0.672435	-0.221051	0.095205	0.037225	-0.542836	0.581404	1.14758	-0.060726	0.660314	-2.00155	-0.162554	-0.12539	-1.53006	0.76342	-0.853445	-0.670991	-0.130553	-0.253461	0.690418	0.02753	0.44337	-0.576052	-0.688445	0.871447	-0.345269
frg_924	0.847833	0.342804	-0.024043	-0.551658	0.277954	0.159324	0.29678	-0.518946	-0.437724	-0.436087	-0.181475	-0.115885	0.107627	-0.346391	-0.50995	-0.179275	-0.378575	-0.181458	0.253431	-0.304055	-0.010285	0.315713	0.484797	-0.462409	-0.196958	0.095774	-0.513959	0.128654	-0.992971	0.47349	0.336312	-0.149201	-0.159683	-1.72841	0.406321	-0.325128	-0.850967	-0.011468	-0.127656	0.221329	0.004154	-0.106083	0.671963	-0.187647	-0.162784	-0.097386	-1.01497	0.670974	-0.14015
frg_728	0.543509	0.671921	0.997984	0.413054	0.042893	0.309795	-0.566423	1.70647	0.307004	0.170829	0.219568	-1.0224	0.209728	0.012869	0.205803	-0.17591	-1.23224	-0.486287	0.346358	0.922691	-0.907595	0.489152	-0.528371	0.03926	-0.087818	-0.402861	-0.246338	0.428218	-0.114175	-0.232984	-0.365211	0.095615	-0.462277	0.338877	0.236864	-0.198042	0.162631	0.711353	0.14413	0.095655	-0.205578	-0.112712	-0.280995	0.6186	0.136153	-0.218069	-0.056889	-0.722752	0.245016
frg_498	0.647676	0.110767	1.65159	-0.148322	-0.327114	0.53278	-0.692317	0.50719	-0.227006	-0.367892	0.703648	0.001353	0.079736	0.257533	0.23452	-0.814273	-1.31363	-0.979788	-0.273003	0.150375	-0.931549	-0.745686	0.505636	-0.596106	-0.073745	0.117669	-0.351295	-0.481892	-0.181287	-0.037451	1.19427	0.39344	0.940332	-0.577673	-0.288504	0.502756	0.321004	0.457525	-0.188516	-0.358018	0.012128	-0.217832	-0.0956	0.190813	0.949593	0.191366	0.440689	0.72942	-0.521174
frg_1629	-0.444706	0.347465	-0.029079	-0.639965	0.199484	-0.700529	-0.485794	-0.081652	0.242642	-0.482228	-0.109255	-0.380602	-0.988177	-1.24061	-0.378627	-0.122562	-0.031025	0.367951	-0.244848	-0.368339	-0.460155	-0.308048	0.715725	-0.980785	-1.22527	0.220752	0.381491	0.928933	-0.230282	0.691245	0.413047	-0.208624	0.292157	-1.23409	0.10708	-0.634183	-0.296515	-0.258041	0.248143	-0.211676	-0.260512	-0.45612	-0.895954	0.603267	0.00744	-0.200875	-0.084762	0.08454	0.582814
frg_1496	-0.114491	0.549103	-0.527619	-0.866404	0.575606	0.146337	-0.447074	-0.034571	-0.556205	-0.596077	-0.445929	-0.327534	0.607491	-0.500023	-0.98834	-0.249942	0.048091	-0.183715	-0.073782	-0.25358	0.674321	-0.037345	-0.815949	-0.356368	0.487966	0.29471	0.476635	0.390845	-0.683675	0.085935	0.912212	0.211219	0.243856	-1.21938	-0.502032	-0.610798	-0.227164	-0.160947	-0.583108	-0.304758	-0.333722	-0.231184	0.215562	0.024138	0.283992	0.10605	-0.622102	-0.122866	-0.019983
frg_607	-0.024535	0.486303	0.07105	-0.24922	-0.016286	0.094888	-0.333869	-0.437621	-0.832773	0.845134	-0.259832	-0.483132	0.354429	-0.53149	-0.086994	1.0817	0.173706	-0.465612	-0.518841	-0.448319	0.083262	-0.161577	-0.453962	-0.36563	-0.029054	-0.385026	-0.343608	-0.790888	-1.18994	0.104889	0.581776	-0.128374	0.420622	-0.215982	-0.017498	0.529853	-1.4432	-0.346428	0.5024	-0.063636	0.160049	0.933989	-0.457837	0.126231	0.256958	-0.52315	0.447718	-0.361702	-0.028379
frg_518	0.171342	-0.335424	0.958627	0.395513	-0.084299	-0.11533	-0.304308	-0.085905	0.025364	0.45042	-0.577782	0.202507	0.539863	-0.713869	0.924123	-0.780384	0.298377	-1.40066	-0.671709	-0.13063	-0.005749	-0.778488	0.126286	-0.444587	0.131688	-0.333843	-0.664359	-0.169882	0.560926	0.70215	0.753681	-0.338443	0.353402	-0.478482	-0.156028	-0.487498	-0.249274	0.01017	-0.495012	0.282843	-0.308135	0.202719	-0.371305	0.08949	-0.005685	-0.068693	-0.03056	0.204304	-0.144176
frg_1301	0.092674	0.688959	0.247802	0.141554	0.170089	0.416684	-0.043611	-0.171762	-0.685889	-0.021099	-1.16344	-0.102608	-0.069727	0.185317	0.351479	-0.057033	-0.087926	-0.454968	0.497933	-1.04695	-0.033826	0.116796	-0.305273	-0.947973	0.165693	0.232331	-0.474462	0.670781	-1.21464	-0.575426	0.781938	-0.635127	-0.225469	-1.46596	-0.416749	0.028793	-1.22786	0.423343	0.869416	-0.661302	-0.324464	0.153145	-0.086838	0.157887	0.08884	0.035508	-0.881656	1.06218	-0.393536
frg_404	0.373198	-0.47936	0.551007	0.033675	-0.065286	-0.260157	-0.839044	0.074212	0.864496	-0.312185	-0.773766	0.355709	0.41755	-1.23465	0.522148	-0.1322	-0.004025	-1.03706	-0.462879	0.887257	-0.445679	-0.217619	0.161577	0.189415	0.014291	0.311132	-0.549525	-0.086527	-0.483567	0.987327	0.073231	0.140592	-0.089121	0.003282	-0.219803	-0.795411	-0.472345	0.70572	-0.186787	-0.1564	-0.602062	0.263296	0.012452	0.014379	-0.365029	-0.8644	-0.39064	-0.521908	-0.09391
frg_568	0.189752	0.598394	-0.431969	-0.027835	0.002058	-0.129705	-0.442503	-0.204534	0.292804	-0.122296	0.15735	0.303147	0.628358	-0.34806	0.214381	-0.477337	0.179628	-0.073117	-0.670534	-0.316377	0.228921	-0.399313	-0.014588	-0.222598	-0.013182	0.623616	-0.149659	0.036513	-0.6331	0.599976	0.501823	-0.193737	0.108048	-0.136396	-0.172344	-0.252294	-0.779658	-0.614435	0.056426	0.299409	0.067734	0.152667	-0.375668	0.280814	0.349214	-0.29367	-0.421775	0.52572	0.87411
frg_1615	0.496294	0.735628	0.510378	-0.524166	0.488519	0.411168	-0.317233	-0.283693	0.10215	-0.690508	0.061935	-0.291602	0.152645	-0.962633	-0.750344	-0.2477	0.158283	-0.184365	-0.232737	-1.19623	-0.694188	0.298625	0.147422	-0.343368	-0.147339	0.130427	0.535403	0.26493	0.164423	0.908779	0.823326	-0.20164	0.464255	-1.19753	0.673954	-0.69773	-1.27246	-0.099912	0.451964	-0.022053	-0.595364	-0.131907	0.303913	0.335566	-0.195658	0.218011	-0.638897	0.852816	0.69795
frg_1054	0.727203	0.026737	-0.255689	0.367049	0.555234	0.248197	-0.159332	-0.354827	0.663935	-0.758166	-0.088266	-1.00649	0.263705	-1.03344	-0.496874	-0.055226	-1.28308	-0.662625	0.468965	-0.5292	-0.408101	0.465876	-0.773013	-0.382998	0.365759	-0.002364	-0.408908	0.147468	-0.584698	0.583586	1.31856	0.183156	0.319946	-1.74428	0.043373	-0.178745	-1.46136	0.795247	-0.586599	-0.633174	-0.3885	-0.462258	1.05079	0.361631	0.25565	-0.422513	-0.635632	1.03024	-0.385175
frg_1731	1.29587	-0.559371	0.56456	-0.03287	0.743233	-0.730366	-0.50958	0.158246	0.409627	-0.356172	0.402821	0.199181	0.926698	0.150059	0.345675	-0.751956	-0.435805	-0.902026	-0.696707	0.466831	-1.5144	0.053894	0.424234	-0.638247	-0.509783	-0.253446	-0.330053	-0.963658	-0.114293	0.110845	1.11832	-0.277945	0.062405	0.124063	-0.180134	-0.434133	-0.598308	0.573084	0.765966	0.418402	-0.792163	-0.062847	0.28914	-0.815357	0.063316	-0.443185	-0.438122	-0.567893	-0.114402
frg_697	-0.084483	0.460726	0.644135	-0.340106	-0.972014	0.008435	-0.295091	-0.212517	-0.362547	0.229098	-0.042515	-0.698442	0.836785	-0.008762	0.008803	0.133262	-0.249031	-1.2001	0.134974	-0.280866	-0.443351	-0.742069	0.493146	-0.197899	1.28507	0.04354	-0.718261	-0.132161	-0.946677	0.419418	0.78685	0.466344	0.385784	-0.057753	-0.335507	0.111146	-0.383511	-0.559326	-0.404311	-0.048952	0.180796	0.421307	-0.178394	0.124755	0.680844	-0.255977	-0.816189	0.26538	-0.160081
frg_1542	1.1914	0.628997	0.088316	0.433999	0.103909	-1.42249	-0.28614	0.641786	-0.070657	0.816634	0.070757	0.003677	0.907227	-0.335665	0.497528	-0.26526	-0.433338	-0.393317	0.360629	0.312605	-0.136919	-0.314833	0.122361	-1.19031	-0.46837	-0.213156	-0.095684	0.010137	-0.804217	0.134047	0.310387	0.309341	0.34815	0.005495	-0.802109	0.591204	-0.948289	-0.581968	1.18454	-0.017269	-0.323225	-0.820557	-0.047321	0.246443	0.696625	-0.876709	-0.151911	0.717997	-1.00095
frg_781	0.799249	-0.362294	0.060184	0.555625	-0.001993	-0.028846	-0.785064	-0.189348	-0.078326	-0.347866	-0.020358	0.053999	1.22706	-0.094139	-0.962724	-0.411389	0.074047	-0.905544	-1.23251	-0.23609	-1.10974	-0.096727	-0.031067	-0.250497	-0.184359	-0.709368	-0.183238	-0.456097	-1.23024	1.18029	0.344663	-0.571054	0.763019	-0.906338	-0.140183	-0.412412	-0.145931	0.460814	-0.085009	0.154193	0.322961	0.34368	0.030088	-0.699861	0.330549	-0.458902	-0.262172	0.536157	0.589805
frg_470	0.980212	0.263746	-0.087805	-0.531256	0.239393	0.039485	0.136871	-0.041975	0.433242	-0.503034	0.062031	0.191508	0.031721	0.459202	0.442478	-0.138515	0.360422	-0.18508	-0.145697	-0.200651	0.22476	0.238099	0.386103	-0.301232	0.313422	-0.047096	-0.601039	-0.574538	-0.426025	0.051623	0.320243	-0.711865	0.665577	-0.03031	-1.241	-0.22045	-0.85059	0.078045	-0.162302	-0.064451	-0.59836	-0.407068	-0.080105	-0.607675	-0.164298	-0.69363	-0.502359	-0.74708	-0.17196
frg_112	0.726575	0.476032	-0.088071	-0.531772	0.25242	0.467095	-0.380019	-0.126319	-0.133833	-0.54814	-0.5956	-0.003208	-0.380927	-1.03176	0.514883	0.082478	-0.197881	0.567243	0.301098	-0.069193	0.394606	-0.069408	-0.304435	-0.607227	-0.217599	0.529596	-0.600135	0.190459	-0.352905	0.108269	-0.280756	0.125473	-0.574695	-1.15247	-0.318574	-0.528239	-1.12708	0.219826	0.006093	-0.473966	-0.369936	-0.438979	-0.128021	0.26783	0.095869	0.385073	-0.695085	0.280176	-0.258767
frg_385	0.42469	0.345511	0.115002	0.25547	-0.033251	0.387297	-0.372117	-0.095932	-0.150691	-0.401859	-0.107969	-0.492475	0.251202	0.47421	1.37084	-0.624923	-0.851137	-0.078777	-0.979375	-0.459645	-0.973974	-1.01765	-0.212793	-0.074807	0.128269	-0.577963	-0.028364	-0.044574	-0.059345	-0.471003	0.120437	-0.211844	0.760622	-0.169323	0.377051	0.363693	0.217493	0.177352	-0.256862	-0.541848	0.068311	-0.09897	-0.487932	0.354066	0.58085	0.70741	0.118686	-0.688891	-1.03194
frg_602	0.293128	-0.258252	0.714396	0.582774	0.140401	-0.0425	-0.297585	-0.324123	0.200325	0.572758	-0.690146	-0.179309	0.744947	0.240807	0.364171	-0.815431	-0.756824	-1.18645	-0.046143	-0.601052	-0.732463	-0.633222	0.484775	0.271079	0.182925	0.080789	-1.26246	-0.597056	0.088333	-0.427319	0.653404	-0.075596	-0.55663	-1.41317	0.550926	-1.11211	-0.8382	0.408705	0.184511	0.552383	0.059617	-0.290867	-0.300419	-0.982399	0.287985	-0.372673	-0.448558	0.056596	0.484831
frg_364	0.457847	0.176512	-0.038352	-0.13112	0.259958	0.705697	-0.252854	0.342725	-0.530634	-0.859727	0.146889	-0.468529	-0.189799	0.409975	0.316113	0.187976	-0.450599	-0.073673	-0.434236	-0.037772	-0.449049	-0.638055	-0.00263	-0.258352	-0.030691	-0.517217	-0.192763	0.144702	-0.246093	-0.582179	0.498838	0.571634	-0.413523	-0.061307	-0.153753	0.258724	0.326202	-0.452373	0.363101	-0.395703	-0.51877	-0.414235	-0.781014	0.773259	0.607202	0.936442	-0.229918	0.176022	-0.149846
frg_513	0.156769	-0.446437	0.493978	-0.358096	-0.583164	0.112871	-0.430569	-0.484572	0.769477	-0.501781	-0.064367	0.369062	0.466571	-0.343575	-0.751571	-0.212979	-0.347721	-0.907344	-0.473379	-0.225845	-0.371705	-0.0818	1.07319	-0.192938	-0.213987	0.130021	-1.18347	-0.844211	-0.297474	0.924465	0.277812	-0.103009	0.188094	-0.896886	0.400526	-0.984232	-0.142779	0.313175	-0.501726	-0.137237	-0.161241	0.106259	1.20255	0.165281	-0.820024	-0.442285	-1.06606	-0.338376	0.450207
frg_1209	0.785485	-0.098642	0.558019	-0.286398	-0.35735	0.811739	-0.473994	0.410377	0.596907	-0.358782	-0.509807	-0.002239	0.7159	0.504762	-0.464564	-0.367355	-0.217069	-0.140325	-0.288799	0.108783	-0.406052	0.02701	-0.675407	0.587578	1.24486	-0.361112	-0.833817	-0.396796	-0.929879	-0.448479	-0.019879	-0.184859	0.090416	-0.390369	0.137692	0.045215	-0.972125	-0.272366	-0.559603	-0.117067	-0.719459	0.085849	-0.304592	-0.323496	0.319736	-0.138831	-0.249031	-0.155121	0.584699
frg_844	0.114708	-0.079098	0.485377	-0.491563	0.11741	0.827364	-0.791295	-0.470964	0.484767	0.226866	-0.387381	0.090325	0.3781	0.05689	0.129538	-0.60415	0.089378	-1.68941	0.453889	-0.859964	-0.52343	-1.10464	0.564638	0.587386	-0.319584	0.119569	-1.47069	-0.77175	-0.567317	-0.310817	0.458564	-0.284473	-0.126371	-1.37682	0.191649	-0.992728	-0.303745	0.273939	-0.345687	0.076815	-0.911894	-0.374691	-0.265508	-0.213511	0.128628	-0.373329	-1.03236	-0.542964	0.631397
frg_1156	1.1896	0.285561	0.284502	-0.140712	-0.195961	0.008392	-0.117326	-0.460146	0.272918	-0.440188	0.973032	-0.428418	0.599286	-0.011123	-0.0656	-1.00768	-1.36884	-0.08651	-0.054408	0.000965	-0.786265	-0.786448	0.396228	-0.83257	-0.41024	-0.419424	0.497966	-0.304766	-0.552931	0.040366	1.1455	1.28929	0.194624	-0.985689	-0.28734	0.498175	-0.023283	0.073667	1.27681	-0.369586	0.197952	-0.177209	0.468375	-0.289463	0.684175	-1.03703	-0.683392	0.527017	-0.805906
frg_579	1.01533	0.323604	-0.091428	-0.617822	0.122968	0.722335	-0.205247	0.07899	0.04147	-0.524752	-0.407207	-0.384397	-0.582206	-0.668861	-0.218108	-0.646257	-0.05081	-0.093941	0.455903	-0.08955	0.199173	0.254547	-0.338249	-0.736838	0.215826	0.280071	-0.717852	-0.106663	-0.337158	-0.177487	0.634438	0.224756	-0.568743	-1.15939	-0.194134	-0.341228	-0.469892	0.696896	0.353534	-0.720317	-0.384772	-0.261978	0.189085	-0.261211	-0.248249	0.473341	-0.594216	-0.127116	-0.253281
frg_510	0.069448	1.05757	0.588924	-0.333026	0.33309	0.140417	-0.918601	1.10365	-0.168673	0.413782	-0.774148	-0.763571	-0.587406	-1.13423	0.606676	-0.687173	-0.835889	0.296706	0.510885	0.621954	0.18984	-0.250214	-0.640456	-1.39186	-0.402276	0.323574	-0.129905	0.865582	0.141603	0.099949	0.417647	0.596791	-0.121226	-1.0306	0.204239	-0.433206	0.289879	0.369007	0.967996	-0.897932	-0.130202	-0.741153	-0.319624	0.688006	0.264537	-0.261211	-0.070904	0.128886	-0.364779
frg_482	0.930559	0.052079	1.04539	0.035866	-0.18314	0.782755	-0.463774	-0.249808	-0.136162	-0.08439	0.368317	0.026066	-0.085355	0.038792	0.118301	-0.33297	-1.09251	-0.778776	0.215577	0.098739	-0.50938	-1.05292	-0.4363	0.395575	0.741189	0.197257	-0.576276	-0.832072	0.013597	0.016558	0.717858	0.781813	-0.045918	-1.1611	0.418273	0.324626	-0.176898	0.356829	0.280591	-0.545285	0.781008	0.056067	0.2197	0.112267	0.740954	0.145395	0.233949	0.409807	-0.352051
frg_837	0.899343	-0.019915	0.8669	0.387367	-0.416876	-0.520552	-0.415069	-0.025036	0.082022	0.387735	-0.269092	-0.039972	0.969836	0.064895	-0.092293	-0.329658	-1.0253	-1.12553	-0.293368	0.261856	-0.481621	-0.41806	-0.074948	-0.525171	0.446184	-0.195195	-1.41051	0.855128	-0.645808	0.302281	0.643601	0.451607	0.056432	-1.61162	-0.123805	-0.077917	-0.507198	1.06697	0.522258	-0.264198	0.125895	-0.943417	0.322179	-0.270786	-0.328938	-0.060069	-0.27783	0.635463	0.064532
frg_902	-0.807765	-0.500034	0.613716	0.00586	-0.315321	-0.046539	-0.122375	0.169541	0.458422	-0.584741	-0.72761	-0.434459	-0.856772	-0.117936	1.07011	-0.396057	-0.695211	-0.08748	-0.850099	-0.239292	-0.827745	-0.967626	0.105848	-0.539102	0.348792	-0.786733	0.162011	0.038764	0.000535	0.447436	-0.25805	0.233367	0.764675	0.367368	-0.707522	-0.09011	-0.55108	-0.704829	0.256965	-0.441973	0.177424	-0.171247	-0.423955	0.334618	0.817869	0.015566	0.866471	-0.771693	-0.025703
frg_695	0.883899	-0.502914	0.437144	0.465975	0.551001	-0.221618	-0.668569	0.276371	-0.085828	-0.63454	0.330973	-0.129702	0.341987	0.264643	0.298416	-1.05431	0.061879	-1.04272	0.225291	0.781624	-0.180726	-0.52463	0.034944	0.151926	0.339515	-0.67672	0.29459	-0.851867	-0.850743	-0.488875	0.670058	0.322742	0.137251	-1.30366	-0.722356	0.159627	-0.527519	0.662929	-0.562107	-0.236534	-0.68084	-0.52412	0.069501	-0.464058	0.299477	-0.204085	-0.866893	0.964321	-0.285005
frg_1289	0.996632	-0.049431	-0.012964	-0.022302	0.337363	0.563284	0.198291	-0.067128	-0.30582	-0.91404	0.240226	-0.157234	0.270167	0.903918	-0.594589	-1.0961	-0.205872	0.025507	-0.098075	-0.339395	-0.37676	-0.775628	-0.27614	-0.786777	0.005432	-0.754598	0.598081	0.20693	-0.747562	0.046599	0.576462	-0.237118	-0.292007	-0.698425	0.163958	0.358706	-0.674354	-1.05061	0.312483	-0.276949	-0.501022	-0.593601	-0.371299	0.492687	0.62158	0.122865	-0.340391	0.651696	0.081398
frg_853	0.584252	-0.107131	1.08395	0.095826	-0.481056	0.432268	-0.380129	0.618945	0.382827	-0.125132	-0.128938	1.06504	0.433302	-0.648315	1.43948	-1.01943	0.821778	-0.970687	-0.440369	-0.335186	-0.038688	-1.43081	0.391584	-0.302211	0.969682	-0.445269	-1.48902	-0.479079	0.075545	0.857915	0.445962	-0.244202	0.120943	-0.513531	-0.305398	0.2338	-0.619152	0.088072	-1.04062	-0.087889	0.081509	-0.066811	-1.02097	0.132068	0.297843	-0.056661	-0.333076	0.455983	-0.024121
frg_1196	0.071409	0.032171	0.184596	-0.04574	0.750308	0.48272	-0.225133	0.290702	0.681247	-0.720496	0.460191	-0.285025	0.411186	-0.208864	0.359419	-1.10879	0.976238	-0.0923	-0.012367	-0.371068	-0.154607	-0.98405	0.014437	-0.385825	0.81582	-0.657242	-0.139625	-0.530291	-0.604984	0.245914	0.58714	-0.518533	0.28429	-0.989108	-0.366619	0.098198	-0.593741	0.316272	-0.269874	0.222766	-0.126108	-0.105317	-0.013222	0.356641	-0.035653	-0.520513	-0.708058	1.00553	-0.003138
frg_628	0.766103	-0.462662	0.438271	0.851127	-0.224304	-1.08844	0.466422	-0.394175	-0.149768	0.460274	-0.389702	-0.514822	0.673946	-0.583725	-0.165083	0.367302	-0.90346	-1.20847	-0.540258	0.368282	-0.683253	0.140861	0.264318	-0.892851	1.10752	-1.31063	-0.915543	0.307714	-0.614026	1.04301	0.013239	0.441105	0.008489	-1.20913	-0.709794	0.311462	-0.769278	1.185	1.15977	-1.0336	0.128456	-0.069477	0.675561	-0.256732	0.038071	-0.539484	-0.326026	0.806006	-0.789319
frg_765	0.172823	0.568945	-0.334533	-0.326778	0.230087	0.543045	-0.323542	0.211335	-0.232217	0.078185	-0.457619	-0.101038	-0.241591	-0.536299	0.267276	-0.714143	-0.092607	-0.163531	0.422654	-0.498633	-0.208921	-0.376262	0.052931	-0.456646	0.134137	0.387822	-0.707213	0.070509	-1.06187	-0.186409	0.950493	-0.224186	-0.330274	-1.35143	-0.164024	-0.468312	-0.411654	0.501817	0.027322	-0.698632	0.026585	-0.25782	-0.090207	0.067234	-0.180143	0.137918	-0.694097	0.688286	0.174782
frg_915	0.952617	0.327251	1.04732	0.398019	0.044964	0.316872	-0.153877	0.273378	0.202988	-0.412864	0.393485	-0.986981	0.694439	-0.46089	-0.003434	-0.428115	-0.727212	-1.10229	0.454438	-0.284084	-1.20295	-0.344804	0.299364	-0.416822	1.04969	-0.311364	-1.08319	0.442483	-0.576964	-0.087802	1.76793	0.540343	-0.098985	-1.93199	0.678158	0.683407	-0.918716	0.490525	0.318986	-1.03955	-0.713333	-0.412383	-0.12444	0.654062	1.1144	0.123755	-0.944641	1.16168	-0.420397
frg_771	0.682104	0.726296	-0.450481	0.177712	0.321374	-0.584799	0.398606	0.286521	-0.043946	0.203621	-0.567239	-0.214479	0.208014	-0.042246	0.743681	0.310454	-0.842335	-0.017049	-0.028313	0.268591	-0.609066	-0.045626	-0.174719	-0.422599	-0.006129	0.474058	-0.600012	0.283753	-0.69804	0.481126	-0.023331	0.08524	0.528672	-0.251853	-0.006702	0.651862	-0.768075	-0.185341	-0.085928	0.005314	-0.343131	-0.801174	-0.221734	1.03503	1.06392	-0.055198	-0.082933	0.248848	-0.807972
frg_1351	0.400236	-0.575857	0.216927	0.597174	0.450425	-0.400946	0.667669	-0.717714	0.20385	0.027713	-0.641265	-0.436488	0.856377	-0.65926	0.744004	0.51094	-0.109604	-0.767219	0.49124	0.186371	-0.144142	0.786672	-0.001497	-0.864938	0.882123	0.059371	-0.685107	0.578822	-0.692046	0.302241	0.976993	0.353488	0.039379	-1.27601	0.031404	-0.181074	-1.7051	1.46891	0.552154	-0.57117	-0.489279	-0.136556	0.328927	1.33459	0.611758	0.251578	-0.968116	1.77126	-0.474175
frg_1489	0.288877	-0.023496	0.614758	0.369456	-0.576874	-0.667772	-0.035748	-0.35454	0.078091	0.682391	0.148842	-0.176798	0.711548	0.132146	-0.46348	0.445882	-0.603975	-1.24338	-0.083686	0.281292	-0.64136	-0.09075	0.315976	-0.679922	0.706574	-0.194531	-0.797778	0.426165	-0.503554	0.613905	0.780829	0.279705	0.103625	-1.66306	-0.115948	-0.01316	-0.66254	1.06029	0.854459	0.09952	0.04806	-0.329686	0.778493	-0.16649	-0.2049	-0.626796	-0.722697	0.730994	-0.068518
frg_670	-0.025957	-0.267151	0.739712	-0.238573	0.092982	-0.131582	-0.139185	-0.246902	0.111052	0.362402	0.242843	-0.286762	0.570526	-0.215204	-0.50418	0.22816	-0.076454	-0.875736	-0.595865	-1.39127	-0.520428	-0.493317	0.204262	-0.397298	0.570872	-1.01072	-0.474298	-0.558705	-0.024428	0.635906	0.385107	-0.022832	0.169325	-0.393478	0.317985	-0.462361	-0.945924	0.183824	0.042778	-0.493533	0.626214	0.613933	0.739865	0.869647	-0.105996	-0.171789	-0.056116	0.451373	0.305075
frg_761	0.633629	0.994932	0.259755	-0.27545	0.03866	0.310591	0.080011	0.646078	-0.494402	0.119064	0.175422	-0.261642	0.139581	0.63996	-0.189373	-0.747511	-0.064089	-0.24613	0.015464	0.624578	-0.057114	0.042303	0.046594	-0.372068	-0.160523	-0.012487	-0.694388	0.436244	-0.323844	-0.303114	0.077997	0.31367	-0.551181	-0.835469	0.286061	-0.149519	-0.03387	0.009611	0.650082	-0.044663	0.357068	-0.533127	-0.263629	0.336445	0.410988	0.243662	-0.232944	-0.317232	0.09
frg_1300	0.316512	0.44105	0.206587	-0.137624	0.828416	0.528521	0.605426	-0.728597	-0.052947	0.083318	-0.473268	-0.592277	-0.15956	0.111046	0.441886	0.603327	0.105076	0.032129	-0.117941	-0.448247	-0.241672	0.503089	-0.173313	-0.68981	0.462889	0.159161	-0.227807	0.029418	-0.786428	0.235902	-0.307159	-0.419538	0.402489	-0.843907	-0.140374	0.445065	-0.918605	0.279796	0.332371	-0.390833	-0.500455	-0.256286	0.399707	0.689327	0.110989	0.294742	0.213523	-0.027572	-0.619309
frg_1695	0.903761	-0.05855	-0.290278	0.045335	0.572866	0.691089	-0.005438	0.556947	-0.186236	-0.959947	-0.330513	-0.141841	0.691767	0.513534	1.04246	-0.527601	-0.513845	-0.640553	-1.07966	0.128027	-0.781722	-0.650463	-0.310466	-0.170754	-0.022576	-0.093231	-1.10494	-0.21148	-0.499884	-0.824464	0.663695	0.384244	-0.173303	0.252008	0.345915	0.399988	-0.254782	0.568645	-0.514041	0.184163	-0.80415	-0.586519	-0.258378	0.419977	0.540601	0.301237	-0.408148	-0.163535	-0.857223
frg_217	0.988654	-0.146337	0.688657	0.223375	0.046444	0.118925	-0.039428	-0.443439	-0.013686	-0.348762	0.663002	-0.051053	0.282015	-0.479238	-0.014142	-0.206072	-0.426822	-0.586995	-0.299082	-0.493248	-0.629178	-0.553006	0.852697	-0.431149	0.000801	-0.297442	0.20941	-0.264922	-0.12475	1.52942	0.565347	-0.023729	0.261875	-0.671684	0.726648	0.213165	-0.965125	-0.260817	-0.125887	0.085959	-0.27585	0.151804	0.151109	0.927156	-0.484136	-0.358283	-0.022131	1.20309	0.71874
frg_188	0.304833	0.358366	-0.688613	-0.432551	0.264569	0.727166	-0.369541	-0.223846	0.416447	-0.279321	0.248962	-0.150068	0.137221	-0.076284	-0.064818	0.017352	0.239036	0.394175	-0.550951	-0.461135	-0.017738	-0.487824	-0.150629	0.247366	0.832875	0.017221	-0.576965	-0.386441	-0.710146	-0.149449	0.53953	0.049514	0.89151	-0.102572	-0.023581	0.523246	-1.01748	-0.370084	0.006878	0.088468	0.127869	0.413671	-0.440808	-0.218622	0.440589	-0.177544	-0.093374	-0.278541	0.722168
frg_1741	1.14304	0.038054	0.028898	0.425563	0.424457	0.294803	-0.404087	0.747947	0.211598	-0.540126	0.167817	-0.187134	0.20122	1.03377	0.639062	-1.08014	-0.836705	-0.640031	-0.166748	0.581504	-0.86591	-0.462887	0.008999	0.343836	-0.515578	-0.361528	-0.124086	-0.254924	-0.041801	-0.851091	0.698966	0.120357	0.333841	0.294373	-0.175284	0.327802	-0.281522	0.453333	0.059866	-0.070038	-0.915455	-0.767498	0.892417	-0.057969	0.516725	-0.452598	0.367179	-0.576904	-0.139603
frg_313	0.146013	0.654916	-0.90131	-0.593827	-0.063057	0.754842	-0.065485	0.454964	0.253027	-0.415441	-0.570124	0.408504	-0.446697	-0.149718	0.302423	-0.712561	0.41061	-0.175703	0.213414	-0.636836	0.423413	-0.49822	-0.395875	-0.839783	-0.23206	0.162147	-0.944439	0.110856	-0.325529	-0.291475	0.251525	-0.400193	-0.24003	-1.20157	-0.196592	-0.748883	-0.234221	0.660671	0.011447	-0.613893	0.082988	-0.835003	0.584225	0.081309	-0.211926	0.253366	-0.360466	0.424716	0.17175
frg_372	-0.0885	0.484151	-0.86651	-0.210406	0.174022	-0.852773	-0.217008	0.182109	-0.189197	0.058805	-0.341128	-0.07585	0.086899	0.529967	0.283181	-0.340863	-0.429802	0.067428	-0.50685	-0.435581	-0.757861	-0.683532	0.036617	-0.901592	-0.108566	-0.153131	0.151078	-0.318545	-0.798814	0.164743	0.297419	0.124359	-0.195442	-0.532433	-0.61338	-0.146007	-0.843938	-0.365374	0.560714	-0.16385	0.674968	-0.374076	-0.460768	-0.386867	0.520562	0.098096	-0.496805	0.324023	0.776661
frg_1791	1.66372	0.02459	-0.318425	0.229665	-0.094381	0.592757	-0.289978	0.534431	-0.201462	-1.30915	-0.688905	-0.163461	0.10476	-0.548975	0.107177	-0.680059	-1.36807	-0.878564	-1.11217	0.460669	-0.882333	-0.556167	-0.338462	-0.555533	-0.804499	-0.354631	-0.618909	0.082727	-0.040632	-0.38637	1.77494	0.625903	1.16733	-1.11441	0.85758	0.073397	-0.728599	1.12891	0.507863	-0.787509	-1.56898	-1.77972	0.725118	0.574155	1.09262	-0.161646	-0.384523	0.51907	-0.513459
frg_1519	1.51301	-0.213413	-0.133549	0.518102	0.986704	0.204139	0.933517	-0.595468	0.036903	-0.422209	-0.261894	-0.689016	0.526003	-0.498222	0.322559	-0.00681	-0.785833	-0.648789	0.776892	0.023109	0.022994	0.239081	-0.005576	-0.711845	0.532992	-0.223079	-0.509292	0.491189	-0.980233	0.594447	1.29696	-0.01229	0.018444	-1.73081	-0.025203	0.282923	-1.22393	0.857922	-0.380419	-0.827555	-0.659177	-0.495974	0.568906	0.572996	-0.030496	-0.313594	-0.949415	1.31459	-0.768136
frg_381	-0.261436	0.39498	-0.289761	-0.328435	0.349793	0.183712	-0.186755	-0.151545	-0.54227	0.546429	-0.200979	-0.23433	0.37062	-0.129608	-0.08075	0.89936	0.162896	0.170484	-0.596736	-0.781068	0.246938	-0.486344	0.087556	-0.066334	0.117427	-0.004479	-0.634446	-0.667184	-0.70704	0.091882	0.813485	-0.133977	0.39426	-0.954892	-0.21802	0.308321	-1.12366	-0.31466	-0.126621	0.205603	0.330943	0.349818	-0.194887	-0.260945	0.295491	0.037047	-0.004853	0.113081	-0.268644
frg_314	0.631024	-0.432161	0.184825	-0.418462	0.769612	0.565477	-0.333563	0.233066	0.754814	-0.551757	-0.117408	0.094901	-0.844367	0.018414	-0.283495	0.226298	-0.322721	-0.051266	-0.485758	-0.298989	-0.758384	-1.29988	0.171556	-0.317665	0.065927	-0.265373	-0.30683	-0.001613	-0.471013	0.292906	0.044234	0.466433	0.277124	0.113799	0.2506	-0.212607	-0.21782	0.033196	0.428107	-0.60187	-0.279962	-0.137046	-0.206521	0.446118	0.181037	-0.160727	0.088485	0.429438	0.42406
frg_221	-0.075004	-0.133707	0.0591	-0.014818	0.100057	0.017197	-0.442289	-0.327597	-0.375033	0.30049	-0.68221	-0.483722	-0.163727	-0.398043	0.602661	1.23558	-0.240647	-0.05725	-0.479653	-0.600965	0.175187	-0.335545	-0.359993	-0.509038	0.472114	-0.585027	-0.339166	-0.872744	-0.839169	-0.218388	0.347717	-0.207027	0.260936	-0.891788	-0.13478	0.098373	-1.39969	-0.537553	0.017618	-0.276406	0.03091	0.815091	-0.420884	-0.192766	0.188752	-0.243182	0.349154	-0.089586	-0.502441
frg_882	0.154092	-0.180757	-0.196844	-0.84696	-0.198078	0.570896	-0.419588	-0.28156	0.701474	-0.202174	-0.149214	0.08931	0.282372	-0.205393	0.508648	0.097444	-0.077945	-0.384792	-0.595701	-0.463702	0.266776	-0.442983	0.261122	0.446296	0.290506	-0.598377	-0.646362	-0.500932	-0.494034	0.805822	-0.017231	0.155929	0.166985	-0.946938	0.510011	-0.338884	-0.677595	0.315396	-1.21687	0.391398	0.009976	0.413812	0.643084	0.408514	-0.86864	-0.131122	-0.864362	0.079194	0.09782
frg_796	0.72372	0.081253	-0.60276	-0.214626	-0.395592	-0.346772	0.436592	-0.576392	-0.254025	-0.719081	-0.15669	-0.207774	-0.328645	-0.495223	-0.270257	-0.016711	-0.192743	0.353884	0.204865	-0.271228	0.473991	0.588883	-0.021379	-1.00811	-0.264931	0.102357	1.11806	0.45509	-0.006445	0.328055	-0.097777	-0.501104	0.007611	-0.688191	0.351464	-0.056709	-1.1269	-0.446301	0.765505	-0.166339	-0.480319	-0.338576	0.085641	0.040096	-0.198267	5.5e-05	-0.76733	0.515416	-0.188667
frg_481	0.823523	-0.005618	1.24551	-0.078329	-0.053945	0.429999	-0.479166	-0.132295	-0.205623	0.133513	0.292741	0.146915	0.132856	-0.025735	-0.050031	-0.307391	-1.16912	-0.582829	0.15268	-0.042003	-0.582961	-0.950199	-0.298294	0.335116	0.972129	0.392597	-0.604961	-0.78845	-0.048347	0.110607	0.806119	0.831952	-0.122613	-1.28544	0.457954	0.152748	-0.29683	0.386449	0.499003	-0.487622	0.584537	0.055014	0.440424	0.159153	0.665674	0.188869	0.095894	0.359537	-0.459067
frg_613	-0.400746	0.116851	-0.054392	-0.100222	0.100087	-0.111693	-0.444219	-0.661129	-0.172361	0.075226	-0.297979	-0.101277	1.03233	0.681399	-0.627203	-0.836175	-0.235658	0.290085	0.058748	-0.30535	-0.161117	-0.374691	0.583172	-1.02003	-0.388908	-0.158828	0.694016	-0.29084	-1.55137	-0.441463	0.342628	-0.003952	0.358227	-0.588538	0.150475	-0.592629	-1.03834	-0.431779	-0.274235	0.114371	0.081376	-0.064843	0.008509	-0.504542	0.395871	-0.115869	-0.764805	0.075173	0.549725
frg_912	1.12337	-0.285891	-0.139018	-0.185601	0.102176	0.521807	-0.062429	0.78486	0.046437	-0.382815	-0.24099	-0.257982	0.32078	0.222347	0.560167	0.071465	-0.267304	0.142861	-0.282788	-0.378348	0.518013	-0.529561	-0.310582	0.329219	0.462502	-0.651509	-0.853316	-0.23991	-0.524525	-0.005518	0.760154	0.322328	-0.434765	0.013495	-0.227788	0.379403	-0.530146	-0.467658	-0.485203	0.022345	-0.662749	-0.098723	-0.643095	0.680323	0.74504	0.661221	-0.134131	0.331844	-0.230967
frg_807	1.21497	-0.445819	0.558989	-0.382311	0.487327	0.560354	-0.702017	0.276864	0.391908	-0.349527	0.147003	-0.472557	0.368646	0.169308	0.158596	-1.17075	-1.4246	-0.344926	-0.758103	0.189231	-1.05147	-0.333173	0.102727	-0.280563	-0.18361	-0.567344	-0.104957	-0.092153	-0.74012	-0.004619	0.871995	1.13563	0.012841	-0.812322	0.463249	0.069636	0.50518	0.274787	0.970831	-0.574685	0.185367	0.010671	-0.234678	0.334582	0.863151	-0.602216	-0.043907	0.179918	-0.177483
frg_390	0.986809	-0.113087	-0.458605	-0.138745	0.147986	0.114512	0.477875	-0.635237	-0.984845	-0.168293	0.259605	0.101697	0.189834	0.477284	-0.398177	0.581761	-0.111631	0.39943	0.020593	-0.088707	0.102529	0.128914	-0.174791	-0.170924	0.190837	-1.12285	0.174843	-0.099906	-1.31123	0.160501	-0.116635	0.041273	-0.31094	-0.5685	0.348326	-0.016791	-1.18476	0.111977	-0.270833	0.088526	-0.879457	0.208824	0.179582	0.49309	0.203118	0.485914	-0.598485	0.23927	-0.111244
frg_428	0.784211	0.441693	0.152178	-0.312116	0.207699	0.650154	-0.193715	-0.414398	0.006976	0.319368	0.420526	-0.70707	-0.355209	-0.077989	0.459825	-0.577367	-0.270894	0.137304	-0.190356	-0.268775	0.520911	-0.16629	-0.310165	-0.320874	0.485711	0.11847	-0.61959	-0.579125	-0.250706	0.10962	0.24599	0.138473	-0.200216	-0.392302	0.135164	0.335366	-0.291489	-0.201284	-0.069883	-0.08042	1.01658	-0.389453	-0.633075	0.059535	-0.345009	0.138724	0.172604	-0.22055	-0.109043
frg_594	0.350304	-0.414523	0.61709	-0.394807	-0.572348	0.242231	-0.553587	-0.017611	0.223059	0.259977	-0.49944	0.635684	-0.208821	-0.531711	0.499522	0.078231	-0.046771	-0.256171	-0.39569	-0.50522	-0.219664	-0.209753	-0.009417	0.270364	-0.432141	-0.965382	0.132371	-1.21074	-0.215692	0.45623	0.479437	-0.307644	0.0167	0.13854	0.747086	-0.058125	-2.09112	-0.631133	0.013155	0.99286	-0.485766	0.350422	0.240022	0.965078	0.146973	-0.579525	-0.370039	0.660229	0.142001
frg_738	1.09198	0.620801	-0.787022	0.172889	0.09744	0.661736	0.209921	-0.166871	-0.05185	-0.682017	-0.028286	-0.077141	0.575861	0.621983	-0.562651	0.031771	-0.303176	0.20571	-0.741499	-0.445293	-0.373282	-0.437295	-0.258542	0.064644	0.106645	0.161969	0.067865	-0.623386	-1.22255	-0.129216	-0.087597	0.107514	-0.031269	0.027164	0.061398	0.117841	-0.229937	-0.006859	0.190408	-0.015999	0.178682	0.454823	-0.278439	0.156033	0.687055	0.501809	-0.008678	-0.587011	0.806039
frg_1296	0.729174	-0.307901	1.07211	-0.24074	0.301755	-0.392395	-0.158185	-0.593374	0.737247	0.746706	-0.289176	-0.635266	-0.35838	-0.591487	0.891386	-1.00915	-0.718927	-0.232472	0.682009	0.363304	-0.151486	-0.782499	-0.44528	-1.41213	-0.137468	0.148877	-0.240691	0.135898	-0.129292	0.70152	1.27492	0.520404	0.215902	-0.462451	0.57258	0.147473	-0.0955	-0.146527	0.503883	0.315961	0.01921	-0.275881	-0.097774	0.437681	0.487162	-0.490401	-0.199911	0.516668	0.032314
frg_893	1.07414	-0.142955	0.884403	-0.002122	0.432528	0.706766	-0.022005	-0.675724	0.546403	-0.547843	0.15183	0.428829	0.787249	-0.085763	0.80699	-1.20643	-0.540647	-0.828058	-0.405414	0.016616	-0.842233	-0.862967	0.904876	-0.223099	0.544234	0.3784	-1.39881	-0.298257	-0.294778	-0.648858	1.45366	0.157443	0.103497	-1.82016	0.974942	-0.574023	-0.16838	-0.486769	-0.581752	-1.05842	-0.150476	-0.353755	0.660168	-0.032743	0.963946	-0.546535	-0.395014	1.04282	-0.214653
frg_449	0.61632	0.181733	0.836978	-0.026209	-0.189073	0.177693	-1.04546	-0.054118	-0.255484	0.084432	0.510602	0.123596	0.134705	0.079903	0.101343	-0.12727	-1.37878	-1.18003	-0.318997	-0.198501	-0.765335	-0.864167	-0.204749	0.054811	0.318768	-0.045642	-0.524618	-0.788096	0.218607	0.297839	0.575994	0.57643	-0.001421	-0.285888	-0.110423	0.096291	-0.185863	0.329732	0.518558	0.054537	1.17087	0.421073	0.2275	0.111888	0.344194	-0.069166	0.43275	-0.248816	-0.163407
frg_1145	0.29255	0.221676	0.379802	-0.120495	-0.455874	0.470217	-0.951697	-0.03891	-0.331028	0.289909	-0.391428	0.860144	0.576597	0.13095	0.151689	-1.37924	0.416483	-0.876355	-0.378397	-0.679652	-0.059923	-0.791099	-0.17059	-0.234034	0.532796	-0.815079	-0.146545	-0.353671	-1.19167	-0.367198	0.656577	-0.454689	0.013362	-1.40668	-0.057346	0.12777	-1.59719	-0.599743	-0.372616	-0.271427	0.004214	-0.117431	-0.145226	0.306623	0.803291	-0.1337	-0.341778	0.915368	-0.027784
frg_412	1.3839	0.873843	-0.472376	-0.134138	0.394558	0.016766	-0.549408	-0.226683	-0.351898	-0.532931	0.025383	-0.097677	0.794182	-1.0303	0.390557	-0.168745	-0.75684	0.114874	-0.215555	0.173267	0.393176	-0.374203	-0.152365	-1.26164	-0.350361	0.195772	-0.63277	-0.028144	-0.723675	0.086713	0.998511	0.368054	-0.423294	-0.819821	0.449577	-0.430647	-0.248096	0.349607	0.196413	-0.346998	0.079418	-0.811211	-0.235537	0.274425	0.584751	0.120303	-0.758812	0.585534	-0.394404
frg_454	0.439654	0.408696	1.48472	-0.335113	0.132602	0.161229	-0.574559	0.720995	-0.588629	0.288264	-0.322691	-0.970263	-0.39116	-0.434475	0.385475	-0.701656	-0.964797	-0.073294	0.831324	0.270402	-0.635831	-0.313191	-0.292833	-0.971742	-0.011668	0.44617	-0.173425	0.595899	-0.20677	0.293488	1.3642	1.31839	-0.551476	-0.811143	0.265497	-0.418868	0.273317	0.470528	1.47935	-1.02572	-0.24419	0.096806	-0.619168	0.366275	0.590663	0.28406	-0.237272	0.079146	0.055715
frg_1238	0.701175	0.782517	0.863205	-0.318005	-0.215013	0.222313	-0.506348	0.159363	-0.153506	-0.240886	-0.301519	-0.370629	0.135769	-1.21155	0.84338	-0.89019	-0.140981	-1.0563	0.908444	-0.225938	-0.515649	-0.50833	0.137687	-0.140964	0.846757	-0.263505	-0.43158	0.560917	0.063548	-0.152136	0.246951	0.100738	-0.667355	-0.851502	0.014072	0.316845	-0.581946	0.423913	0.577451	-0.989304	-0.391062	-0.022548	0.305272	-0.070309	0.38967	0.251889	-1.09709	1.12445	-0.414031
frg_196	0.061695	-0.35175	0.180347	0.271251	0.676628	0.20105	-1.17915	0.16877	0.518773	-0.046421	0.026939	-0.401884	1.06112	0.499947	-0.313064	0.151132	-1.0074	-0.347598	-1.32911	-0.13615	-0.811334	-0.410067	0.470355	0.196647	0.030275	0.148958	0.368054	-0.358989	-0.163323	0.119752	0.266376	0.060694	-0.052346	-0.747965	0.464885	-0.813864	0.176836	0.272744	-0.62889	0.813623	-0.34465	0.444489	0.146987	-0.159104	0.386949	-0.273366	-0.000479	-0.149542	0.711856
frg_1461	0.634407	0.842722	1.16522	-0.198482	-0.320153	0.106029	-0.614039	-0.115362	-0.80725	-0.10677	-0.565683	-0.925984	0.716427	-0.643935	0.185014	-0.436582	-1.12668	-1.24222	0.446205	-0.708414	-0.996025	-0.581	-0.455407	-0.259469	0.609018	-0.653575	-0.267493	0.290039	-0.753903	-0.125507	0.981221	0.105569	-0.473402	-1.78813	0.274396	0.526568	-1.40968	-0.360491	0.048826	-1.13088	-0.668333	-0.008212	-0.076676	0.4029	1.01884	0.079896	-1.01179	0.693851	-0.251768
frg_1421	0.084126	0.466092	-0.181717	0.094177	-0.444038	0.812165	-0.225246	0.725749	0.122591	-0.516332	-0.80007	0.206958	-0.340378	-0.415648	0.454461	-0.238215	0.417671	0.109268	0.093409	-0.961124	-0.106141	-0.375917	0.102702	-0.359736	0.402379	0.39597	-1.11285	0.273007	-0.166838	0.161947	0.55773	-0.855379	-0.045709	-1.45095	-0.343109	-0.722926	-0.439393	0.70564	-0.004955	-0.551184	-0.310204	-0.166544	-0.241585	0.609911	0.181511	0.084495	-0.784747	0.54571	0.217908
frg_214	0.964586	-0.180554	0.267865	-0.341923	-0.869198	-0.208481	-1.32833	-0.156117	0.199908	0.346254	-0.67871	1.03343	0.858566	-0.576438	0.12406	-0.009648	-0.643557	-0.267193	0.065817	0.175791	0.451196	-0.095915	0.277761	-1.22967	-0.331395	-0.182762	-0.376713	-0.605047	-1.23691	0.259563	0.538095	0.29031	0.139218	0.415074	-0.788887	0.334365	-1.87171	-0.561617	-0.378117	0.02341	0.339141	0.14493	-0.009967	-0.708467	-0.322387	-0.56631	-0.241643	0.272659	-0.726418
frg_1785	1.19929	-0.064335	0.374945	0.246551	0.054117	0.592938	-0.182436	1.00176	0.219566	-0.440069	-0.039878	-0.339552	0.486529	1.24393	-0.024239	-0.801287	-0.506237	-0.921357	-0.642341	0.254983	-0.621484	-0.00363	-0.033442	0.087078	0.32784	-0.464784	-0.930005	-0.294266	-0.261698	-0.46298	0.728158	0.598634	-0.00179	0.375213	0.027808	-0.00445	-0.023878	0.649613	0.341294	-0.171354	-0.271844	-0.547617	0.467222	0.203031	0.541581	0.13255	-0.099187	-0.110771	-0.231584
frg_316	0.812669	-0.783122	0.86134	0.081352	0.112047	0.110216	-0.364416	0.120005	0.335506	-0.158026	-0.27459	-0.006549	0.99865	0.444207	0.686904	-0.631828	-0.887644	-0.567924	-0.186985	-0.266491	-0.80145	-0.915858	0.697838	-0.61993	-0.108251	-0.417176	-0.37403	-0.091768	-0.437509	-0.038913	0.331136	0.654363	-0.553326	-0.554159	0.672604	-0.24004	0.344679	0.102757	-0.150479	0.10487	-0.164935	-0.529156	-0.247897	0.230263	0.274181	0.078115	-0.697361	0.154319	0.044569
frg_804	0.583148	-0.436931	0.923491	-0.551142	0.482207	0.821011	-0.238344	-0.486536	-0.571403	-0.917886	-0.13923	-0.543563	0.752448	0.96226	-0.406271	0.784167	-0.773902	-0.183968	-0.500357	-0.485507	-0.13842	0.59147	-0.527661	0.423561	1.37839	-0.670573	-0.240466	-0.261233	-0.331087	0.071204	-0.118281	0.662148	-0.313051	0.0073	0.319874	0.6019	-0.359495	0.652353	0.029978	0.848395	0.016666	0.101623	-0.320898	0.173816	0.453623	0.924928	-0.0415	-0.47606	-0.29813
frg_845	0.196172	0.469543	0.388871	0.270159	0.121686	-0.318782	-0.259663	-0.59889	-0.551663	0.698126	-0.511933	-0.089009	0.133089	0.519945	-0.178424	-0.520147	0.083552	-0.785942	-0.068379	-0.408764	-0.654094	-0.470458	0.834485	-0.254892	0.04812	-0.281039	-0.207701	-0.16846	-1.02307	-0.460697	0.230281	-0.387711	-0.075009	-1.87567	0.054662	-0.553638	-1.14926	-0.065878	0.696941	0.251468	0.214174	-0.178554	-0.054782	-0.64813	0.77398	-0.247946	-0.417965	0.364203	0.813507
frg_223	1.50304	-0.016504	-0.342264	0.102914	-0.182307	0.520194	-0.303082	0.53113	-0.153284	-1.19466	-0.660447	-0.079153	0.09927	-0.54997	0.116125	-0.77512	-1.27179	-0.83749	-1.03953	0.365453	-0.926711	-0.599683	-0.230968	-0.575173	-0.702378	-0.295116	-0.616797	0.021743	0.032141	-0.315895	1.7578	0.644903	1.23832	-0.891778	1.0006	-0.087344	-0.612603	1.16799	0.5529	-0.740526	-1.53067	-1.69869	0.612104	0.418197	1.00418	-0.203203	-0.379829	0.464268	-0.409961
frg_505	0.436902	-0.152167	0.715032	-0.404408	0.029621	1.19543	-0.73845	-0.858436	0.058279	-0.339694	0.034125	0.879015	-0.040138	-0.00529	-0.090529	-0.373867	-0.398827	-1.11104	-0.097997	-0.187743	-0.399844	-0.873204	0.582842	0.308354	0.624093	-0.098985	-0.563163	-1.66701	-0.403156	0.604655	0.921101	0.282636	0.11074	-0.57936	0.653062	-0.553566	0.144385	-0.12634	-0.571861	-0.285803	0.2027	0.56726	0.084812	0.298891	0.297929	-0.222487	-0.982476	0.097289	0.633984
frg_1330	1.09339	-0.068219	0.227287	0.020294	0.485019	-0.332872	-0.208499	-0.897162	-0.613552	-0.131099	-0.509414	-0.915671	0.13687	-0.106191	0.225872	0.206052	-0.286151	-0.706734	0.627281	-0.554926	-0.204785	0.055566	-1.10364	-0.420118	0.798582	-0.671583	0.21987	-0.180681	-0.570136	-0.191096	1.09737	0.10489	0.16037	-1.98672	-0.086299	0.230761	-1.5815	0.850333	0.276754	-1.22561	-0.040924	0.016964	-0.057439	0.230967	0.041867	-0.298949	-1.15671	1.12859	-0.301092
frg_1460	0.507138	0.12336	0.342083	0.001514	0.692664	0.768265	-0.570003	0.05858	0.063676	0.417299	-1.24899	0.053161	-0.000943	-0.990575	0.299157	0.63171	0.091806	-0.261446	0.304208	-0.491647	0.001177	0.509928	-0.251688	-0.592873	0.270589	0.101388	-0.747101	0.188323	-0.932425	0.004953	0.593931	0.051972	-0.317171	-1.47661	-0.273139	-0.121628	-1.16754	0.089829	0.309695	-0.458887	-0.118466	0.020064	-0.062617	0.087469	0.367654	-0.146454	-0.053947	0.761269	-0.365343
[truncated: 1,007 more rows]
[truncated: 51 more columns]

## Sheet: 3_Atom Fragments Vectors
Vectors for fragments with 3 heavy atoms
Total number of fragments = 10162, Vector Length = 100
[truncated: 10,162 more rows]
[truncated: 51 more columns]

## Sheet: 4_Atom Fragments Vectors
Vectors for fragments with 4 heavy atoms
Total number of fragments = 37013, Vector Length = 100
[truncated: 37,013 more rows]
[truncated: 51 more columns]
